# Supplementary material for: Phosphorylation-driven epichaperome assembly is a regulator of cellular adaptability and proliferation
Source: Nat Commun. 2024 Oct 16;15:8912. doi: 10.1038/s41467-024-53178-5 (PMC11484706; doi:10.1038/s41467-024-53178-5)
Supplement: Supplementary file 4 — Supplementary Data 2 [file 41467_2024_53178_MOESM4_ESM.xlsx]

## Sheet: PU GA XL peptides
PU GA XL		PU XL: O7062106_PU XL, O7062806_PU XL, O7062807 PU XL
		GA XL: O6071510_GA XL, O7062004_GA XL, O7062805_GA XL
m/z	z	ppm	DB Peptide 1	Peptide 1	DB Peptide 2	Peptide 2	Fraction	RT	Score	Score Diff	Expect	Sc 1	Exp 1	Rk 1	Sc 2	Exp 2	Rk 2	L Sc	Acc #	XLink AA 1	Intra 1	Inter 1	Decoy 1	Acc #	XLink AA 2	Intra 2	Inter 2	Decoy 2	Protein MW	Species	Protein Name	Protein MW	Species	Protein Name
952.539	2	-9.7	KKLSELLR	K(+DSS)KLSELLR	MKETQK	M(Oxidation)K(+DSS)ETQK	O7062806_PU	35.903	21.8	4.1	0.072	17.7	0.35	1	3.5	89	69	7.3	P07901	458	1	0	0	P11499	477	1	0	0	84788.6	MOUSE	Heat shock protein HSP 90-alpha	83281.9	MOUSE	Heat shock protein HSP 90-beta
687.865	4	-1.2	FYEAFSKNLK	FYEAFSK(+DSS)NLK	APFDLFENRKK	APFDLFENRK(+DSS)K	O7062806_PU	25.429	26.5	9.2	0.1	17.3	5.1	1	3.7	1671	215	9.2	P11499	435	1	0	0	P07901	357	1	0	0	83281.9	MOUSE	Heat shock protein HSP 90-beta	84788.6	MOUSE	Heat shock protein HSP 90-alpha
687.865	4	-0.22	FYEAFSKNLK	FYEAFSK(+DSS)NLK	APFDLFENRKK	APFDLFENRK(+DSS)K	O7062807_PU	25.237	26.3	4.4	0.14	15.1	19	3	5.8	1068	142	11.2	P11499	435	1	0	0	P07901	357	1	0	0	83281.9	MOUSE	Heat shock protein HSP 90-beta	84788.6	MOUSE	Heat shock protein HSP 90-alpha
635.361	3	-11	KKLSELLR	K(+DSS)KLSELLR	MKETQK	M(Oxidation)K(+DSS)ETQK	O7062807_PU	35.909	18.3	6.4	0.2	11.7	3.2	2	4.5	66	40	9.8	P07901	458	1	0	0	P11499	477	1	0	0	84788.6	MOUSE	Heat shock protein HSP 90-alpha	83281.9	MOUSE	Heat shock protein HSP 90-beta
635.362	3	-9.1	KKLSELLR	K(+DSS)KLSELLR	MKETQK	M(Oxidation)K(+DSS)ETQK	O7062004_GA	40.029	16.7	1.8	0.29	11.7	2.3	3	1.8	144	105	8.2	P07901	458	1	0	0	P11499	477	1	0	0	84788.6	MOUSE	Heat shock protein HSP 90-alpha	83281.9	MOUSE	Heat shock protein HSP 90-beta
952.54	2	-8.1	KKLSELLR	K(+DSS)KLSELLR	MKETQK	M(Oxidation)K(+DSS)ETQK	O7062807_PU	35.858	20.2	0.7	0.31	16	1.3	3	3.6	97	78	9.5	P07901	458	1	0	0	P11499	477	1	0	0	84788.6	MOUSE	Heat shock protein HSP 90-alpha	83281.9	MOUSE	Heat shock protein HSP 90-beta
748.73	3	2	ELISNASDALDKIR	ELISNASDALDK(+DSS)IR	DGDKK	DGDK(+DSS)K	O6071510_GA	35.875	20.6	2.2	0.41	18.4	1	1	-0.4	2027	326	4.4	P11499	53	1	0	0	P07901	275	1	0	0	83281.9	MOUSE	Heat shock protein HSP 90-beta	84788.6	MOUSE	Heat shock protein HSP 90-alpha
1099.94	3	1.8	ELISNASDALDKIR	ELISNASDALDK(+DSS)IR	ADLINNLGTIAKSGTK	ADLINNLGTIAK(+DSS)SGTK	O7062004_GA	31.816	55.1	27.4	2.7e-8	27.7	0.01	1	22.4	0.12	3	27.4	P11499	53	1	0	0	P11499	107	1	1	0	83281.9	MOUSE	Heat shock protein HSP 90-beta	83281.9	MOUSE	Heat shock protein HSP 90-beta
1099.93	3	-0.6	ELISNASDALDKIR	ELISNASDALDK(+DSS)IR	ADLINNLGTIAKSGTK	ADLINNLGTIAK(+DSS)SGTK	O7062806_PU	26.439	56.5	30	3.3e-8	26.5	0.025	1	24.7	0.056	2	30	P11499	53	1	0	0	P11499	107	1	1	0	83281.9	MOUSE	Heat shock protein HSP 90-beta	83281.9	MOUSE	Heat shock protein HSP 90-beta
1099.94	3	3	ADLINNLGTIAKSGTK	ADLINNLGTIAK(+DSS)SGTK	ELISNASDALDKIR	ELISNASDALDK(+DSS)IR	O7062106_PU	25.292	51.3	25.7	1.9e-7	25.6	0.025	1	20.8	0.23	3	27.8	P11499	107	1	1	0	P11499	53	1	0	0	83281.9	MOUSE	Heat shock protein HSP 90-beta	83281.9	MOUSE	Heat shock protein HSP 90-beta
1099.94	3	1.6	ADLINNLGTIAKSGTK	ADLINNLGTIAK(+DSS)SGTK	ELISNASDALDKIR	ELISNASDALDK(+DSS)IR	O6071510_GA	36.068	48.4	26.2	1.5e-6	22.2	0.18	1	20.9	0.31	3	28.3	P11499	107	1	1	0	P11499	53	1	0	0	83281.9	MOUSE	Heat shock protein HSP 90-beta	83281.9	MOUSE	Heat shock protein HSP 90-beta
1099.93	3	-0.51	ELISNASDALDKIR	ELISNASDALDK(+DSS)IR	ADLINNLGTIAKSGTK	ADLINNLGTIAK(+DSS)SGTK	O7062807_PU	26.385	45.1	23.4	2.1e-6	21.7	0.15	1	18	0.87	3	23.4	P11499	53	1	0	0	P11499	107	1	1	0	83281.9	MOUSE	Heat shock protein HSP 90-beta	83281.9	MOUSE	Heat shock protein HSP 90-beta
1099.94	3	0.95	ELISNASDALDKIR	ELISNASDALDK(+DSS)IR	ADLINNLGTIAKSGTK	ADLINNLGTIAK(+DSS)SGTK	O7062805_GA	26.975	41.2	21.4	3.5e-5	19.8	0.53	1	15.5	3.7	6	21.4	P11499	53	1	0	0	P11499	107	1	1	0	83281.9	MOUSE	Heat shock protein HSP 90-beta	83281.9	MOUSE	Heat shock protein HSP 90-beta
745.419	4	-1.7	KHLEINPDHPIVETLR	K(+DSS)HLEINPDHPIVETLR	IMKAQALR	IMK(+DSS)AQALR	O7062806_PU	21.965	52.7	7.4	5.9e-5	45.3	8.6e-4	1	7.9	633	120	13.8	P11499	624	1	0	0	P11499	607	1	1	0	83281.9	MOUSE	Heat shock protein HSP 90-beta	83281.9	MOUSE	Heat shock protein HSP 90-beta
745.419	4	-2.4	KHLEINPDHPIVETLR	K(+DSS)HLEINPDHPIVETLR	IMKAQALR	IMK(+DSS)AQALR	O7062807_PU	21.693	53.9	5.5	1.3e-4	48.4	8.0e-4	1	5	1530	264	10.8	P11499	624	1	0	0	P11499	607	1	1	0	83281.9	MOUSE	Heat shock protein HSP 90-beta	83281.9	MOUSE	Heat shock protein HSP 90-beta
669.024	3	-2.5	VEKVTISNR	VEK(+DSS)VTISNR	MEESKAK	MEESK(+DSS)AK	O7062807_PU	16.347	30.2	11.5	2.7e-4	18.7	0.067	1	9.8	4.8	5	15.7	P11499	577	1	0	0	P11499	557	1	0	0	83281.9	MOUSE	Heat shock protein HSP 90-beta	83281.9	MOUSE	Heat shock protein HSP 90-beta
772.091	3	-1.2	FYEAFSKNLK	FYEAFSK(+DSS)NLK	IMKAQALR	IMK(+DSS)AQALR	O7062807_PU	22.518	28.4	8.8	7.4e-4	12.9	2.5	8	8.6	23	16	16.6	P11499	435	1	0	0	P11499	607	1	1	0	83281.9	MOUSE	Heat shock protein HSP 90-beta	83281.9	MOUSE	Heat shock protein HSP 90-beta
579.321	4	-0.44	FYEAFSKNLK	FYEAFSK(+DSS)NLK	IMKAQALR	IMK(+DSS)AQALR	O6071510_GA	29.851	39.3	16.3	0.0012	23	0.97	1	10.4	169	25	18.4	P11499	435	1	0	0	P11499	607	1	1	0	83281.9	MOUSE	Heat shock protein HSP 90-beta	83281.9	MOUSE	Heat shock protein HSP 90-beta
835.083	3	1.1	DNSTMGYMMAKK	DNSTMGYMMAK(+DSS)K	LMKEILDK	LMK(+DSS)EILDK	O6071510_GA	31.93	28.5	7.9	0.0013	20.6	0.077	1	2	1057	216	7.9	P11499	623	1	0	0	P11499	568	1	0	0	83281.9	MOUSE	Heat shock protein HSP 90-beta	83281.9	MOUSE	Heat shock protein HSP 90-beta
694.132	4	-2.8	YIDQEELNKTKPIWTR	YIDQEELNK(+DSS)TKPIWTR	EVVKK	EVVK(+DSS)K	O7062807_PU	21.186	33.5	3.7	0.0016	29.8	0.0092	1	-2.2	33112	663	5.9	P11499	284	1	1	0	P11499	203	1	0	0	83281.9	MOUSE	Heat shock protein HSP 90-beta	83281.9	MOUSE	Heat shock protein HSP 90-beta
402.229	3	0.52	MKETQK	MK(+DSS)ETQK	KR	K(+DSS)R	O6071510_GA	11.052	18.9	1.6	0.002	17.3	0.0053	1	-2.1	724	177	3.7	P11499	477	1	0	0	P11499	505	1	0	0	83281.9	MOUSE	Heat shock protein HSP 90-beta	83281.9	MOUSE	Heat shock protein HSP 90-beta
825.203	4	0.16	ELISNASDALDKIR	ELISNASDALDK(+DSS)IR	ADLINNLGTIAKSGTK	ADLINNLGTIAK(+DSS)SGTK	O6071510_GA	36.038	39.1	16.5	0.0026	18.6	13	4	13.5	106	23	20.5	P11499	53	1	0	0	P11499	107	1	1	0	83281.9	MOUSE	Heat shock protein HSP 90-beta	83281.9	MOUSE	Heat shock protein HSP 90-beta
579.319	4	-3.4	FYEAFSKNLK	FYEAFSK(+DSS)NLK	IMKAQALR	IMK(+DSS)AQALR	O7062805_GA	22.99	37.6	19.4	0.0032	17.7	7.1	3	9.7	156	32	17.7	P11499	435	1	0	0	P11499	607	1	1	0	83281.9	MOUSE	Heat shock protein HSP 90-beta	83281.9	MOUSE	Heat shock protein HSP 90-beta
553.642	3	-2.6	FYEAFSKNLK	FYEAFSK(+DSS)NLK	KK	K(+DSS)K	O7062807_PU	19.687	21.4	0	0.0035	21.4	0.0035	1	-8	89282	435	0	P11499	435	1	0	0	P11499	266	5	8	1	83281.9	MOUSE	Heat shock protein HSP 90-beta	83281.9	MOUSE	Heat shock protein HSP 90-beta
553.643	3	-0.29	FYEAFSKNLK	FYEAFSK(+DSS)NLK	KK	K(+DSS)K	O6071510_GA	25.211	23.4	0	0.0036	23.4	0.0036	1	-5.9	23430	417	2.1	P11499	435	1	0	0	P11499	266	5	8	1	83281.9	MOUSE	Heat shock protein HSP 90-beta	83281.9	MOUSE	Heat shock protein HSP 90-beta
579.321	4	-0.96	FYEAFSKNLK	FYEAFSK(+DSS)NLK	IMKAQALR	IMK(+DSS)AQALR	O7062807_PU	22.445	32.8	14.6	0.0043	18.2	2.1	1	8.7	119	22	16.7	P11499	435	1	0	0	P11499	607	1	1	0	83281.9	MOUSE	Heat shock protein HSP 90-beta	83281.9	MOUSE	Heat shock protein HSP 90-beta
699.142	4	-1.7	KHLEINPDHPIVETLR	K(+DSS)HLEINPDHPIVETLR	EILDKK	EILDK(+DSS)K	O7062807_PU	21.974	32.5	1.7	0.0048	30.8	0.011	1	0.3	15260	562	7	P11499	624	1	0	0	P11499	573	1	0	0	83281.9	MOUSE	Heat shock protein HSP 90-beta	83281.9	MOUSE	Heat shock protein HSP 90-beta
547.661	3	-2.5	TKPIWTR	TK(+DSS)PIWTR	EVVKK	EVVK(+DSS)K	O7062807_PU	18.58	20.6	5.8	0.0086	14.8	0.18	1	4.2	48	17	10.1	P11499	286	1	1	0	P11499	203	1	0	0	83281.9	MOUSE	Heat shock protein HSP 90-beta	83281.9	MOUSE	Heat shock protein HSP 90-beta
825.202	4	-1.2	ELISNASDALDKIR	ELISNASDALDK(+DSS)IR	ADLINNLGTIAKSGTK	ADLINNLGTIAK(+DSS)SGTK	O7062807_PU	26.341	35.6	12.4	0.0087	16.8	27	5	11.5	260	34	18.8	P11499	53	1	0	0	P11499	107	1	1	0	83281.9	MOUSE	Heat shock protein HSP 90-beta	83281.9	MOUSE	Heat shock protein HSP 90-beta
534.043	4	-2.9	KVEKVTISNR	KVEK(+DSS)VTISNR	MEESKAK	MEESK(+DSS)AK	O7062806_PU	15.575	30.4	9.7	0.0097	19.4	1.2	5	4.6	790	218	11	P11499	577	1	0	0	P11499	557	1	0	0	83281.9	MOUSE	Heat shock protein HSP 90-beta	83281.9	MOUSE	Heat shock protein HSP 90-beta
587.018	3	-4	NNIKLYVR	NNIK(+DSS)LYVR	EVVKK	EVVK(+DSS)K	O7062805_GA	19.559	19.3	2	0.0098	17.3	0.029	1	3.1	66	26	5.3	P11499	354	1	1	0	P11499	203	1	0	0	83281.9	MOUSE	Heat shock protein HSP 90-beta	83281.9	MOUSE	Heat shock protein HSP 90-beta
648.839	4	-1.5	FYEAFSKNLK	FYEAFSK(+DSS)NLK	APFDLFENKK	APFDLFENK(+DSS)K	O6071510_GA	35.585	30.3	12	0.01	17.1	3.6	2	8.3	183	43	13.2	P11499	435	1	0	0	P11499	347	1	0	0	83281.9	MOUSE	Heat shock protein HSP 90-beta	83281.9	MOUSE	Heat shock protein HSP 90-beta
553.641	3	-3.7	FYEAFSKNLK	FYEAFSK(+DSS)NLK	KK	K(+DSS)K	O7062805_GA	20.063	20.1	0	0.012	20.1	0.012	1	-4.8	5545	359	2	P11499	435	1	0	0	P11499	266	5	8	1	83281.9	MOUSE	Heat shock protein HSP 90-beta	83281.9	MOUSE	Heat shock protein HSP 90-beta
553.641	3	-3.2	FYEAFSKNLK	FYEAFSK(+DSS)NLK	KK	K(+DSS)K	O7062806_PU	19.927	22.1	0	0.013	22.1	0.013	1	-8	49384	435	0	P11499	435	1	0	0	P11499	266	5	8	1	83281.9	MOUSE	Heat shock protein HSP 90-beta	83281.9	MOUSE	Heat shock protein HSP 90-beta
534.043	4	-3.1	KVEKVTISNR	KVEK(+DSS)VTISNR	MEESKAK	MEESK(+DSS)AK	O7062807_PU	15.404	29.8	8.4	0.016	21.4	0.43	1	6.2	177	112	10.5	P11499	577	1	0	0	P11499	557	1	0	0	83281.9	MOUSE	Heat shock protein HSP 90-beta	83281.9	MOUSE	Heat shock protein HSP 90-beta
825.201	4	-2.4	ELISNASDALDKIR	ELISNASDALDK(+DSS)IR	ADLINNLGTIAKSGTK	ADLINNLGTIAK(+DSS)SGTK	O7062805_GA	26.896	34.5	12	0.017	14.6	84	22	11.9	268	49	19.9	P11499	53	1	0	0	P11499	107	1	1	0	83281.9	MOUSE	Heat shock protein HSP 90-beta	83281.9	MOUSE	Heat shock protein HSP 90-beta
825.205	4	2.2	ADLINNLGTIAKSGTK	ADLINNLGTIAK(+DSS)SGTK	ELISNASDALDKIR	ELISNASDALDK(+DSS)IR	O7062106_PU	25.222	35.8	13.1	0.017	14.2	98	28	13.5	130	34	21.6	P11499	107	1	1	0	P11499	53	1	0	0	83281.9	MOUSE	Heat shock protein HSP 90-beta	83281.9	MOUSE	Heat shock protein HSP 90-beta
587.019	3	-2.3	NNIKLYVR	NNIK(+DSS)LYVR	EVVKK	EVVK(+DSS)K	O7062806_PU	19.434	18.1	2.1	0.03	16	0.095	1	3.3	99	23	5.4	P11499	354	1	1	0	P11499	203	1	0	0	83281.9	MOUSE	Heat shock protein HSP 90-beta	83281.9	MOUSE	Heat shock protein HSP 90-beta
579.32	4	-2.3	FYEAFSKNLK	FYEAFSK(+DSS)NLK	IMKAQALR	IMK(+DSS)AQALR	O7062806_PU	22.797	26	13.4	0.031	11.4	44	2	8.7	169	12	16.7	P11499	435	1	0	0	P11499	607	1	1	0	83281.9	MOUSE	Heat shock protein HSP 90-beta	83281.9	MOUSE	Heat shock protein HSP 90-beta
502.019	4	-4	VEKVTISNR	VEK(+DSS)VTISNR	MEESKAK	MEESK(+DSS)AK	O7062806_PU	16.513	28.6	9.3	0.038	19.3	2.1	1	3.4	1845	133	11.4	P11499	577	1	0	0	P11499	557	1	0	0	83281.9	MOUSE	Heat shock protein HSP 90-beta	83281.9	MOUSE	Heat shock protein HSP 90-beta
402.228	3	-2.5	MKETQK	MK(+DSS)ETQK	KR	K(+DSS)R	O7062805_GA	10.944	18.6	1.6	0.039	17	0.087	1	1.1	288	51	9	P11499	477	1	0	0	P11499	505	1	0	0	83281.9	MOUSE	Heat shock protein HSP 90-beta	83281.9	MOUSE	Heat shock protein HSP 90-beta
825.203	4	0.044	ELISNASDALDKIR	ELISNASDALDK(+DSS)IR	ADLINNLGTIAKSGTK	ADLINNLGTIAK(+DSS)SGTK	O7062806_PU	26.43	33.8	13.1	0.046	15.9	56	7	10.6	461	62	17.9	P11499	53	1	0	0	P11499	107	1	1	0	83281.9	MOUSE	Heat shock protein HSP 90-beta	83281.9	MOUSE	Heat shock protein HSP 90-beta
587.019	3	-2.8	NNIKLYVR	NNIK(+DSS)LYVR	EVVKK	EVVK(+DSS)K	O7062807_PU	19.195	20.6	2	0.049	18.6	0.12	1	3.1	185	37	5.3	P11499	354	1	1	0	P11499	203	1	0	0	83281.9	MOUSE	Heat shock protein HSP 90-beta	83281.9	MOUSE	Heat shock protein HSP 90-beta
502.019	4	-3.6	VEKVTISNR	VEK(+DSS)VTISNR	MEESKAK	MEESK(+DSS)AK	O7062807_PU	16.316	21.7	4.4	0.052	16.9	0.56	2	1	1495	149	9	P11499	577	1	0	0	P11499	557	1	0	0	83281.9	MOUSE	Heat shock protein HSP 90-beta	83281.9	MOUSE	Heat shock protein HSP 90-beta
547.661	3	-2.3	TKPIWTR	TK(+DSS)PIWTR	EVVKK	EVVK(+DSS)K	O7062806_PU	18.826	19.4	6.6	0.07	12.8	1.7	1	2.9	218	38	10.9	P11499	286	1	1	0	P11499	203	1	0	0	83281.9	MOUSE	Heat shock protein HSP 90-beta	83281.9	MOUSE	Heat shock protein HSP 90-beta
502.019	4	-4	VEKVTISNR	VEK(+DSS)VTISNR	MEESKAK	MEESK(+DSS)AK	O7062805_GA	16.55	20.9	4.8	0.1	16.1	0.89	1	-1.1	2261	256	4.8	P11499	577	1	0	0	P11499	557	1	0	0	83281.9	MOUSE	Heat shock protein HSP 90-beta	83281.9	MOUSE	Heat shock protein HSP 90-beta
602.838	2	-3.1	MKETQK	MK(+DSS)ETQK	KR	K(+DSS)R	O7062807_PU	11.069	19.5	2.3	0.12	17.2	0.32	1	0.7	357	120	6.5	P11499	477	1	0	0	P11499	505	1	0	0	83281.9	MOUSE	Heat shock protein HSP 90-beta	83281.9	MOUSE	Heat shock protein HSP 90-beta
587.021	3	-0.22	NNIKLYVR	NNIK(+DSS)LYVR	EVVKK	EVVK(+DSS)K	O6071510_GA	24.374	18.6	1.9	0.13	16.7	0.33	1	2	423	67	6.1	P11499	354	1	1	0	P11499	203	1	0	0	83281.9	MOUSE	Heat shock protein HSP 90-beta	83281.9	MOUSE	Heat shock protein HSP 90-beta
648.839	4	-2.1	FYEAFSKNLK	FYEAFSK(+DSS)NLK	APFDLFENKK	APFDLFENK(+DSS)K	O7062807_PU	26.289	21.9	8.9	0.33	12.1	33	3	2.9	2530	238	9.8	P11499	435	1	0	0	P11499	347	1	0	0	83281.9	MOUSE	Heat shock protein HSP 90-beta	83281.9	MOUSE	Heat shock protein HSP 90-beta
648.84	4	-0.42	FYEAFSKNLK	FYEAFSK(+DSS)NLK	APFDLFENKK	APFDLFENK(+DSS)K	O7062806_PU	26.489	21	6.2	0.48	10.7	52	14	5.5	553	109	10.3	P11499	435	1	0	0	P11499	347	1	0	0	83281.9	MOUSE	Heat shock protein HSP 90-beta	83281.9	MOUSE	Heat shock protein HSP 90-beta
687.865	4	-0.36	FYEAFSKNLK	FYEAFSK(+DSS)NLK	RAPFDLFENKK	RAPFDLFENK(+DSS)K	O6071510_GA	34.089	23	4.5	0.58	15	18	3	2.8	3552	316	8	P11499	435	1	0	0	P11499	347	1	0	0	83281.9	MOUSE	Heat shock protein HSP 90-beta	83281.9	MOUSE	Heat shock protein HSP 90-beta
440.517	4	-2	NNIKLYVR	NNIK(+DSS)LYVR	EVVKK	EVVK(+DSS)K	O7062807_PU	19.227	16.7	3.1	0.89	13.6	3.6	1	3.4	341	48	6.3	P11499	354	1	1	0	P11499	203	1	0	0	83281.9	MOUSE	Heat shock protein HSP 90-beta	83281.9	MOUSE	Heat shock protein HSP 90-beta
596.538	5	0.36	KHLEINPDHPIVETLR	K(+DSS)HLEINPDHPIVETLR	IMKAQALR	IMK(+DSS)AQALR	O7062004_GA	25.692	22.3	3.8	1.1	17.6	8.4	2	1	11122	417	8	P11499	624	1	0	0	P11499	607	1	1	0	83281.9	MOUSE	Heat shock protein HSP 90-beta	83281.9	MOUSE	Heat shock protein HSP 90-beta
800.656	4	15	QKAEADKNDK	QK(+DSS)AEADKNDK	AQALRDNSTMGYMMAKK	AQALRDNSTMGYMMAK(+DSS)K	O7062807_PU	24.755	19.9	2.7	7.6	7.2	1154	104	6.8	1352	120	12.7	P11499	641	1	1	0	P11499	623	1	0	0	83281.9	MOUSE	Heat shock protein HSP 90-beta	83281.9	MOUSE	Heat shock protein HSP 90-beta
1105.26	3	-1.4	ADLINNLGTIAKSGTK	ADLINNLGTIAK(+DSS)SGTK	ELISNSSDALDKIR	ELISNSSDALDK(+DSS)IR	O7062805_GA	26.171	47.1	26.2	4.8e-8	20.9	0.089	1	20	0.15	4	26.2	P07901	112	1	1	0	P07901	58	1	0	0	84788.6	MOUSE	Heat shock protein HSP 90-alpha	84788.6	MOUSE	Heat shock protein HSP 90-alpha
1105.26	3	-2	ELISNSSDALDKIR	ELISNSSDALDK(+DSS)IR	ADLINNLGTIAKSGTK	ADLINNLGTIAK(+DSS)SGTK	O7062806_PU	25.8	48.7	25.4	5.9e-8	22.8	0.046	2	19.6	0.24	3	25.9	P07901	58	1	0	0	P07901	112	1	1	0	84788.6	MOUSE	Heat shock protein HSP 90-alpha	84788.6	MOUSE	Heat shock protein HSP 90-alpha
1105.27	3	-0.27	ELISNSSDALDKIR	ELISNSSDALDK(+DSS)IR	ADLINNLGTIAKSGTK	ADLINNLGTIAK(+DSS)SGTK	O7062807_PU	25.642	46.8	26	8.5e-8	20.8	0.092	1	19.7	0.17	2	26	P07901	58	1	0	0	P07901	112	1	1	0	84788.6	MOUSE	Heat shock protein HSP 90-alpha	84788.6	MOUSE	Heat shock protein HSP 90-alpha
1105.27	3	1.5	ELISNSSDALDKIR	ELISNSSDALDK(+DSS)IR	ADLINNLGTIAKSGTK	ADLINNLGTIAK(+DSS)SGTK	O6071510_GA	35.013	44	22.8	3.8e-6	19.2	0.53	2	19.1	0.55	3	24.8	P07901	58	1	0	0	P07901	112	1	1	0	84788.6	MOUSE	Heat shock protein HSP 90-alpha	84788.6	MOUSE	Heat shock protein HSP 90-alpha
1105.27	3	-0.45	ADLINNLGTIAKSGTK	ADLINNLGTIAK(+DSS)SGTK	ELISNSSDALDKIR	ELISNSSDALDK(+DSS)IR	O7062004_GA	30.942	38.6	18.7	6.5e-6	19.9	0.13	1	12.9	5.3	4	18.7	P07901	112	1	1	0	P07901	58	1	0	0	84788.6	MOUSE	Heat shock protein HSP 90-alpha	84788.6	MOUSE	Heat shock protein HSP 90-alpha
1105.27	3	2.9	ELISNSSDALDKIR	ELISNSSDALDK(+DSS)IR	ADLINNLGTIAKSGTK	ADLINNLGTIAK(+DSS)SGTK	O7062106_PU	24.582	41	20.6	9.5e-6	20.4	0.19	1	13.9	4.3	3	20.6	P07901	58	1	0	0	P07901	112	1	1	0	84788.6	MOUSE	Heat shock protein HSP 90-alpha	84788.6	MOUSE	Heat shock protein HSP 90-alpha
791.098	3	-2.4	FYEQFSKNIK	FYEQFSK(+DSS)NIK	IMKAQALR	IMK(+DSS)AQALR	O7062807_PU	21.758	32.1	15.2	1.9e-4	16.9	0.61	1	9.3	34	6	17.3	P07901	444	1	0	0	P07901	616	1	1	0	84788.6	MOUSE	Heat shock protein HSP 90-alpha	84788.6	MOUSE	Heat shock protein HSP 90-alpha
514.977	3	-2.4	VEKVVVSNR	VEK(+DSS)VVVSNR	KTK	K(+DSS)TK	O7062807_PU	14.463	25.6	1.1	2.2e-4	21.9	0.0018	2	-0.2	553	133	6.2	P07901	586	1	0	0	P07901	566	1	1	0	84788.6	MOUSE	Heat shock protein HSP 90-alpha	84788.6	MOUSE	Heat shock protein HSP 90-alpha
514.977	3	-2.8	VEKVVVSNR	VEK(+DSS)VVVSNR	KTK	K(+DSS)TK	O7062806_PU	14.606	28.3	1	3.1e-4	24.7	0.0017	2	0.9	162	91	7.3	P07901	586	1	0	0	P07901	566	1	1	0	84788.6	MOUSE	Heat shock protein HSP 90-alpha	84788.6	MOUSE	Heat shock protein HSP 90-alpha
514.977	3	-3	VEKVVVSNR	VEK(+DSS)VVVSNR	KTK	K(+DSS)TK	O7062805_GA	14.636	28.3	2.4	5.0e-4	24.7	0.003	3	-0.2	783	132	6.2	P07901	586	1	0	0	P07901	566	1	1	0	84788.6	MOUSE	Heat shock protein HSP 90-alpha	84788.6	MOUSE	Heat shock protein HSP 90-alpha
494.003	3	-2.9	ILKVIR	ILK(+DSS)VIR	KNLVK	K(+DSS)NLVK	O7062807_PU	19.274	27	12.5	7.0e-4	14.5	0.5	1	10.9	3.4	6	17.8	P07901	411	1	1	0	P07901	415	1	0	0	84788.6	MOUSE	Heat shock protein HSP 90-alpha	84788.6	MOUSE	Heat shock protein HSP 90-alpha
829.202	4	0.73	ELISNSSDALDKIR	ELISNSSDALDK(+DSS)IR	ADLINNLGTIAKSGTK	ADLINNLGTIAK(+DSS)SGTK	O6071510_GA	35.004	42.4	16.6	9.6e-4	23.9	2	2	13.9	128	23	18.5	P07901	58	1	0	0	P07901	112	1	1	0	84788.6	MOUSE	Heat shock protein HSP 90-alpha	84788.6	MOUSE	Heat shock protein HSP 90-alpha
494.004	3	-1.3	ILKVIR	ILK(+DSS)VIR	KNLVK	K(+DSS)NLVK	O6071510_GA	25.191	23.6	8.1	9.7e-4	15.5	0.12	1	7.5	15	13	12.3	P07901	411	1	1	0	P07901	415	1	0	0	84788.6	MOUSE	Heat shock protein HSP 90-alpha	84788.6	MOUSE	Heat shock protein HSP 90-alpha
494.004	3	-0.51	ILKVIR	ILK(+DSS)VIR	KNLVK	K(+DSS)NLVK	O7062106_PU	18.832	26.1	12.5	0.0015	13.6	0.93	1	8.7	12	7	16.7	P07901	411	1	1	0	P07901	415	1	0	0	84788.6	MOUSE	Heat shock protein HSP 90-alpha	84788.6	MOUSE	Heat shock protein HSP 90-alpha
494.003	3	-2.5	ILKVIR	ILK(+DSS)VIR	KNLVK	K(+DSS)NLVK	O7062805_GA	19.699	25.7	8.1	0.0016	17.6	0.097	1	9.6	5.8	6	13.4	P07901	411	1	1	0	P07901	415	1	0	0	84788.6	MOUSE	Heat shock protein HSP 90-alpha	84788.6	MOUSE	Heat shock protein HSP 90-alpha
494.004	3	0.1	ILKVIR	ILK(+DSS)VIR	KNLVK	K(+DSS)NLVK	O7062004_GA	22.359	23.6	11.3	0.0019	12.3	1.1	1	7.5	16	10	15.5	P07901	411	1	1	0	P07901	415	1	0	0	84788.6	MOUSE	Heat shock protein HSP 90-alpha	84788.6	MOUSE	Heat shock protein HSP 90-alpha
593.575	4	-2.6	FYEQFSKNIK	FYEQFSK(+DSS)NIK	IMKAQALR	IMK(+DSS)AQALR	O7062805_GA	22.226	32.8	15.3	0.0022	17.5	2.5	1	12.6	24	5	18.5	P07901	444	1	0	0	P07901	616	1	1	0	84788.6	MOUSE	Heat shock protein HSP 90-alpha	84788.6	MOUSE	Heat shock protein HSP 90-alpha
370.755	4	0.59	ILKVIR	ILK(+DSS)VIR	KNLVK	K(+DSS)NLVK	O7062004_GA	22.76	34.8	15.6	0.0042	19.2	1.9	1	13.9	15	7	21.9	P07901	411	1	1	0	P07901	415	1	0	0	84788.6	MOUSE	Heat shock protein HSP 90-alpha	84788.6	MOUSE	Heat shock protein HSP 90-alpha
370.756	4	1.4	ILKVIR	ILK(+DSS)VIR	KNLVK	K(+DSS)NLVK	O7062106_PU	18.475	31.7	11.1	0.0046	20.6	0.53	1	12.6	16	8	17.4	P07901	411	1	1	0	P07901	415	1	0	0	84788.6	MOUSE	Heat shock protein HSP 90-alpha	84788.6	MOUSE	Heat shock protein HSP 90-alpha
557.675	3	-3.3	KVEKVVVSNR	K(+DSS)VEKVVVSNR	KTK	K(+DSS)TK	O7062807_PU	13.468	22	3.1	0.0047	18.9	0.026	1	-2.3	3045	266	3.6	P07901	583	1	0	0	P07901	566	1	1	0	84788.6	MOUSE	Heat shock protein HSP 90-alpha	84788.6	MOUSE	Heat shock protein HSP 90-alpha
494.003	3	-3.3	ILKVIR	ILK(+DSS)VIR	KNLVK	K(+DSS)NLVK	O7062806_PU	19.902	23.6	11.3	0.0072	12.3	2.5	1	7.5	30	15	15.5	P07901	411	1	1	0	P07901	415	1	0	0	84788.6	MOUSE	Heat shock protein HSP 90-alpha	84788.6	MOUSE	Heat shock protein HSP 90-alpha
829.2	4	-1.9	ELISNSSDALDKIR	ELISNSSDALDK(+DSS)IR	ADLINNLGTIAKSGTK	ADLINNLGTIAK(+DSS)SGTK	O7062806_PU	25.791	37.9	17.6	0.0089	16	68	13	15.3	90	18	21.9	P07901	58	1	0	0	P07901	112	1	1	0	84788.6	MOUSE	Heat shock protein HSP 90-alpha	84788.6	MOUSE	Heat shock protein HSP 90-alpha
593.576	4	-1	FYEQFSKNIK	FYEQFSK(+DSS)NIK	IMKAQALR	IMK(+DSS)AQALR	O6071510_GA	28.721	30.2	10.8	0.01	19.4	1.4	1	5.9	632	75	14	P07901	444	1	0	0	P07901	616	1	1	0	84788.6	MOUSE	Heat shock protein HSP 90-alpha	84788.6	MOUSE	Heat shock protein HSP 90-alpha
829.2	4	-2.3	ELISNSSDALDKIR	ELISNSSDALDK(+DSS)IR	ADLINNLGTIAKSGTK	ADLINNLGTIAK(+DSS)SGTK	O7062805_GA	26.124	37.6	14.7	0.011	18.7	16	3	11.3	286	50	18.9	P07901	58	1	0	0	P07901	112	1	1	0	84788.6	MOUSE	Heat shock protein HSP 90-alpha	84788.6	MOUSE	Heat shock protein HSP 90-alpha
493.794	4	1.3	EMLQQSKILK	EM(Oxidation)LQQSK(+DSS)ILK	NLVKK	NLVK(+DSS)K	O7062004_GA	21.855	28.2	3.9	0.012	24.3	0.074	1	2.6	2073	172	8.1	P07901	408	1	1	0	P07901	419	1	0	0	84788.6	MOUSE	Heat shock protein HSP 90-alpha	84788.6	MOUSE	Heat shock protein HSP 90-alpha
494.004	3	-0.51	ILKVIR	ILK(+DSS)VIR	KNLVK	K(+DSS)NLVK	O6071510_GA	24.602	21.1	6.6	0.014	14.5	0.4	1	5	51	29	11.9	P07901	411	1	1	0	P07901	415	1	0	0	84788.6	MOUSE	Heat shock protein HSP 90-alpha	84788.6	MOUSE	Heat shock protein HSP 90-alpha
493.793	4	-0.48	EMLQQSKILK	EM(Oxidation)LQQSK(+DSS)ILK	KNLVK	K(+DSS)NLVK	O7062106_PU	18.173	28.3	3.4	0.015	24.9	0.067	1	4	733	116	9.7	P07901	408	1	1	0	P07901	415	1	0	0	84788.6	MOUSE	Heat shock protein HSP 90-alpha	84788.6	MOUSE	Heat shock protein HSP 90-alpha
829.204	4	2.3	ELISNSSDALDKIR	ELISNSSDALDK(+DSS)IR	ADLINNLGTIAKSGTK	ADLINNLGTIAK(+DSS)SGTK	O7062106_PU	24.535	34.6	11.1	0.016	17.9	20	7	11.6	290	44	16.7	P07901	58	1	0	0	P07901	112	1	1	0	84788.6	MOUSE	Heat shock protein HSP 90-alpha	84788.6	MOUSE	Heat shock protein HSP 90-alpha
386.485	4	-2.1	VEKVVVSNR	VEK(+DSS)VVVSNR	KTK	K(+DSS)TK	O7062806_PU	14.634	27.4	3.4	0.017	24	0.075	1	-0.3	2540	210	7.6	P07901	586	1	0	0	P07901	566	1	1	0	84788.6	MOUSE	Heat shock protein HSP 90-alpha	84788.6	MOUSE	Heat shock protein HSP 90-alpha
652.724	3	1.1	EMLQQSKILK	EMLQQSK(+DSS)ILK	KNLVK	K(+DSS)NLVK	O6071510_GA	25.418	22.6	5.9	0.018	16.7	0.31	1	1.9	406	131	5.9	P07901	408	1	1	0	P07901	415	1	0	0	84788.6	MOUSE	Heat shock protein HSP 90-alpha	84788.6	MOUSE	Heat shock protein HSP 90-alpha
494.004	3	-0.91	ILKVIR	ILK(+DSS)VIR	KNLVK	K(+DSS)NLVK	O7062004_GA	22.874	20.8	8.5	0.019	12.3	1.4	1	4.7	66	19	12.7	P07901	411	1	1	0	P07901	415	1	0	0	84788.6	MOUSE	Heat shock protein HSP 90-alpha	84788.6	MOUSE	Heat shock protein HSP 90-alpha
400.007	4	-0.33	KLSELLR	K(+DSS)LSELLR	NLVKK	NLVK(+DSS)K	O6071510_GA	26.586	24.3	6.8	0.022	17.5	0.49	1	7.1	54	8	12.1	P07901	459	1	0	0	P07901	419	1	0	0	84788.6	MOUSE	Heat shock protein HSP 90-alpha	84788.6	MOUSE	Heat shock protein HSP 90-alpha
593.575	4	-2.1	FYEQFSKNIK	FYEQFSK(+DSS)NIK	IMKAQALR	IMK(+DSS)AQALR	O7062806_PU	22.001	28.3	10.3	0.024	14.6	11	9	6.8	359	51	14.8	P07901	444	1	0	0	P07901	616	1	1	0	84788.6	MOUSE	Heat shock protein HSP 90-alpha	84788.6	MOUSE	Heat shock protein HSP 90-alpha
370.754	4	-2.4	ILKVIR	ILK(+DSS)VIR	KNLVK	K(+DSS)NLVK	O7062806_PU	19.998	29.3	11.1	0.025	18.2	2.6	1	8.4	152	24	14.3	P07901	411	1	1	0	P07901	415	1	0	0	84788.6	MOUSE	Heat shock protein HSP 90-alpha	84788.6	MOUSE	Heat shock protein HSP 90-alpha
593.575	4	-2.4	FYEQFSKNIK	FYEQFSK(+DSS)NIK	IMKAQALR	IMK(+DSS)AQALR	O7062807_PU	21.716	31.2	11	0.027	15.9	13	7	10.4	115	21	16.4	P07901	444	1	0	0	P07901	616	1	1	0	84788.6	MOUSE	Heat shock protein HSP 90-alpha	84788.6	MOUSE	Heat shock protein HSP 90-alpha
652.723	3	-0.74	EMLQQSKILK	EMLQQSK(+DSS)ILK	KNLVK	K(+DSS)NLVK	O7062106_PU	19.099	21.6	4.1	0.027	17.5	0.19	1	-0.3	954	212	4.1	P07901	408	1	1	0	P07901	415	1	0	0	84788.6	MOUSE	Heat shock protein HSP 90-alpha	84788.6	MOUSE	Heat shock protein HSP 90-alpha
370.755	4	-0.49	ILKVIR	ILK(+DSS)VIR	KNLVK	K(+DSS)NLVK	O6071510_GA	25.168	24.4	11.4	0.028	12.1	6.2	3	7.5	47	12	14.4	P07901	411	1	1	0	P07901	415	1	0	0	84788.6	MOUSE	Heat shock protein HSP 90-alpha	84788.6	MOUSE	Heat shock protein HSP 90-alpha
370.754	4	-2.4	ILKVIR	ILK(+DSS)VIR	KNLVK	K(+DSS)NLVK	O7062807_PU	19.771	24.9	8.6	0.028	16.3	1.3	1	8	50	13	12.8	P07901	411	1	1	0	P07901	415	1	0	0	84788.6	MOUSE	Heat shock protein HSP 90-alpha	84788.6	MOUSE	Heat shock protein HSP 90-alpha
493.794	4	2.4	EMLQQSKILK	EM(Oxidation)LQQSK(+DSS)ILK	NLVKK	NLVK(+DSS)K	O7062806_PU	19.203	23.6	4.6	0.033	19	0.35	1	-2.1	17701	410	4.6	P07901	408	1	1	0	P07901	419	1	0	0	84788.6	MOUSE	Heat shock protein HSP 90-alpha	84788.6	MOUSE	Heat shock protein HSP 90-alpha
370.754	4	-2.4	ILKVIR	ILK(+DSS)VIR	KNLVK	K(+DSS)NLVK	O7062807_PU	19.251	27.1	11.9	0.048	12.9	16	4	8.4	100	31	16.3	P07901	411	1	1	0	P07901	415	1	0	0	84788.6	MOUSE	Heat shock protein HSP 90-alpha	84788.6	MOUSE	Heat shock protein HSP 90-alpha
533.006	3	-0.22	KLSELLR	K(+DSS)LSELLR	NLVKK	NLVK(+DSS)K	O6071510_GA	26.575	16.4	8	0.05	8.3	6.8	3	2.6	215	45	10.2	P07901	459	1	0	0	P07901	419	1	0	0	84788.6	MOUSE	Heat shock protein HSP 90-alpha	84788.6	MOUSE	Heat shock protein HSP 90-alpha
652.724	3	0.95	EMLQQSKILK	EMLQQSK(+DSS)ILK	KNLVK	K(+DSS)NLVK	O7062004_GA	22.827	20.6	5.8	0.052	14.8	0.8	1	1.9	355	113	6.9	P07901	408	1	1	0	P07901	415	1	0	0	84788.6	MOUSE	Heat shock protein HSP 90-alpha	84788.6	MOUSE	Heat shock protein HSP 90-alpha
652.722	3	-2.1	EMLQQSKILK	EMLQQSK(+DSS)ILK	KNLVK	K(+DSS)NLVK	O7062807_PU	19.656	19.3	5.7	0.053	13.6	0.85	1	1.4	327	117	6.8	P07901	408	1	1	0	P07901	415	1	0	0	84788.6	MOUSE	Heat shock protein HSP 90-alpha	84788.6	MOUSE	Heat shock protein HSP 90-alpha
370.755	4	0.32	ILKVIR	ILK(+DSS)VIR	KNLVK	K(+DSS)NLVK	O6071510_GA	24.576	25.5	11.1	0.054	14.4	6.5	1	10.5	35	5	15.3	P07901	411	1	1	0	P07901	415	1	0	0	84788.6	MOUSE	Heat shock protein HSP 90-alpha	84788.6	MOUSE	Heat shock protein HSP 90-alpha
343.553	3	-2.1	KNNIK	K(+DSS)NNIK	KK	K(+DSS)K	O7062806_PU	10.982	16.7	0	0.057	16.7	0.057	1	3.5	79	34	4.2	P07901	359	1	14	0	P07901	276	15	10	2	84788.6	MOUSE	Heat shock protein HSP 90-alpha	84788.6	MOUSE	Heat shock protein HSP 90-alpha
652.722	3	-2.9	EMLQQSKILK	EMLQQSK(+DSS)ILK	KNLVK	K(+DSS)NLVK	O7062805_GA	20.361	18.8	5.7	0.07	13.1	1.2	1	0.3	710	176	5.7	P07901	408	1	1	0	P07901	415	1	0	0	84788.6	MOUSE	Heat shock protein HSP 90-alpha	84788.6	MOUSE	Heat shock protein HSP 90-alpha
652.722	3	-1.8	EMLQQSKILK	EMLQQSK(+DSS)ILK	KNLVK	K(+DSS)NLVK	O7062806_PU	19.911	18.2	5.6	0.097	12.5	1.7	3	1.3	473	130	7.8	P07901	408	1	1	0	P07901	415	1	0	0	84788.6	MOUSE	Heat shock protein HSP 90-alpha	84788.6	MOUSE	Heat shock protein HSP 90-alpha
370.754	4	-2.1	ILKVIR	ILK(+DSS)VIR	KNLVK	K(+DSS)NLVK	O7062805_GA	19.689	26.2	9.8	0.12	15.1	9.3	2	6.3	297	57	13.2	P07901	411	1	1	0	P07901	415	1	0	0	84788.6	MOUSE	Heat shock protein HSP 90-alpha	84788.6	MOUSE	Heat shock protein HSP 90-alpha
504.316	4	0.33	NNIKLYVR	NNIK(+DSS)LYVR	IKEIVKK	IKEIVK(+DSS)K	O7062004_GA	22.4	19.5	4	0.13	15.5	0.98	1	1.1	1516	113	5.1	P07901	363	1	1	0	P07901	208	1	0	0	84788.6	MOUSE	Heat shock protein HSP 90-alpha	84788.6	MOUSE	Heat shock protein HSP 90-alpha
343.553	3	-2.6	KNNIK	K(+DSS)NNIK	KK	K(+DSS)K	O7062807_PU	10.966	15.4	0	0.16	15.4	0.16	1	2.2	263	40	4.2	P07901	359	1	14	0	P07901	276	15	10	2	84788.6	MOUSE	Heat shock protein HSP 90-alpha	84788.6	MOUSE	Heat shock protein HSP 90-alpha
652.724	3	0.79	EMLQQSKILK	EMLQQSK(+DSS)ILK	KNLVK	K(+DSS)NLVK	O6071510_GA	25.986	17	5	0.17	11.2	3.1	5	0.8	575	133	5.8	P07901	408	1	1	0	P07901	415	1	0	0	84788.6	MOUSE	Heat shock protein HSP 90-alpha	84788.6	MOUSE	Heat shock protein HSP 90-alpha
370.755	4	-1.6	ILKVIR	ILK(+DSS)VIR	KNLVK	K(+DSS)NLVK	O7062806_PU	19.482	19.2	8.1	0.18	9.1	20	5	4.2	192	37	12.2	P07901	411	1	1	0	P07901	415	1	0	0	84788.6	MOUSE	Heat shock protein HSP 90-alpha	84788.6	MOUSE	Heat shock protein HSP 90-alpha
370.755	4	0.59	ILKVIR	ILK(+DSS)VIR	KNLVK	K(+DSS)NLVK	O7062004_GA	22.251	23.3	10.4	0.24	12.9	17	1	2.4	1230	93	10.4	P07901	411	1	1	0	P07901	415	1	0	0	84788.6	MOUSE	Heat shock protein HSP 90-alpha	84788.6	MOUSE	Heat shock protein HSP 90-alpha
597.336	5	-0.95	KHLEINPDHSIIETLR	K(+DSS)HLEINPDHSIIETLR	IMKAQALR	IMK(+DSS)AQALR	O7062807_PU	22.486	29.5	5.1	0.27	22.1	4.9	5	4.9	3990	327	10.6	P07901	633	1	0	0	P07901	616	1	1	0	84788.6	MOUSE	Heat shock protein HSP 90-alpha	84788.6	MOUSE	Heat shock protein HSP 90-alpha
829.201	4	-0.59	ELISNSSDALDKIR	ELISNSSDALDK(+DSS)IR	ADLINNLGTIAKSGTK	ADLINNLGTIAK(+DSS)SGTK	O7062807_PU	25.681	28.8	9.6	0.3	12	186	28	9.2	543	73	16.8	P07901	58	1	0	0	P07901	112	1	1	0	84788.6	MOUSE	Heat shock protein HSP 90-alpha	84788.6	MOUSE	Heat shock protein HSP 90-alpha
441.798	4	-8.1	ILKVIR	ILK(+DSS)VIR	RIKEIVK	RIK(+DSS)EIVK	O7062806_PU	21.832	20.4	5.5	0.89	10.2	97	19	5.4	882	116	13.4	P07901	411	1	1	0	P07901	204	1	0	0	84788.6	MOUSE	Heat shock protein HSP 90-alpha	84788.6	MOUSE	Heat shock protein HSP 90-alpha
840.078	3	-8.2	DKEVSDDEAEEKEEK	DKEVSDDEAEEK(+DSS)EEK	KNLVK	K(+DSS)NLVK	O7062807_PU	36.948	17.7	2.8	0.92	14.9	2.9	1	1.7	619	249	8.1	P07901	238	1	0	0	P07901	415	1	0	0	84788.6	MOUSE	Heat shock protein HSP 90-alpha	84788.6	MOUSE	Heat shock protein HSP 90-alpha
402.779	4	-0.055	ILKVIR	ILK(+DSS)VIR	KNLVKK	K(+DSS)NLVKK	O6071510_GA	22.444	21.6	7.9	1.2	11	115	4	4.7	1714	93	12.7	P07901	411	1	1	0	P07901	415	1	0	0	84788.6	MOUSE	Heat shock protein HSP 90-alpha	84788.6	MOUSE	Heat shock protein HSP 90-alpha
402.779	4	-0.8	ILKVIR	ILK(+DSS)VIR	KNLVKK	K(+DSS)NLVKK	O6071510_GA	21.831	19.1	6.1	1.2	9.4	124	12	3.8	1768	97	11.8	P07901	411	1	1	0	P07901	415	1	0	0	84788.6	MOUSE	Heat shock protein HSP 90-alpha	84788.6	MOUSE	Heat shock protein HSP 90-alpha
441.798	4	-7	ILKVIR	ILK(+DSS)VIR	RIKEIVK	RIK(+DSS)EIVK	O6071510_GA	28.942	16.3	2.9	1.2	8.1	54	17	4.5	286	62	8.2	P07901	411	1	1	0	P07901	204	1	0	0	84788.6	MOUSE	Heat shock protein HSP 90-alpha	84788.6	MOUSE	Heat shock protein HSP 90-alpha
444.02	4	11	NNIKLYVR	NNIK(+DSS)LYVR	KNNIK	K(+DSS)NNIK	O7062805_GA	20.227	17.7	5.4	1.3	12.3	13	1	2.9	799	96	7.6	P07901	363	1	2	0	P07901	359	1	2	0	84788.6	MOUSE	Heat shock protein HSP 90-alpha	84788.6	MOUSE	Heat shock protein HSP 90-alpha
489.795	4	0.6	EMLQQSKILK	EMLQQSK(+DSS)ILK	NLVKK	NLVK(+DSS)K	O7062004_GA	22.792	18.9	0.1	1.3	14.9	6.5	6	0.3	2288	351	4	P07901	408	1	1	0	P07901	419	1	0	0	84788.6	MOUSE	Heat shock protein HSP 90-alpha	84788.6	MOUSE	Heat shock protein HSP 90-alpha
560.835	4	-9.5	EMLQQSKILK	EMLQQSK(+DSS)ILK	RIKEIVK	RIK(+DSS)EIVK	O7062807_PU	21.92	17.9	4.6	2.5	11.9	31	13	-1	6782	412	6	P07901	408	1	1	0	P07901	204	1	0	0	84788.6	MOUSE	Heat shock protein HSP 90-alpha	84788.6	MOUSE	Heat shock protein HSP 90-alpha
441.798	4	-8.1	ILKVIR	ILK(+DSS)VIR	RIKEIVK	RIK(+DSS)EIVK	O7062807_PU	21.594	16.4	0.4	2.8	9.1	82	12	1.4	2909	185	9.4	P07901	411	1	1	0	P07901	204	1	0	0	84788.6	MOUSE	Heat shock protein HSP 90-alpha	84788.6	MOUSE	Heat shock protein HSP 90-alpha
489.794	4	-0.63	EMLQQSKILK	EMLQQSK(+DSS)ILK	KNLVK	K(+DSS)NLVK	O6071510_GA	25.486	16.8	1.1	2.9	12.2	20	11	0	3327	312	4.6	P07901	408	1	1	0	P07901	415	1	0	0	84788.6	MOUSE	Heat shock protein HSP 90-alpha	84788.6	MOUSE	Heat shock protein HSP 90-alpha
441.798	4	-7	ILKVIR	ILK(+DSS)VIR	RIKEIVK	RIK(+DSS)EIVK	O7062004_GA	25.776	17.3	3.5	3.4	11.3	52	4	3.3	1985	156	6	P07901	411	1	1	0	P07901	204	1	0	0	84788.6	MOUSE	Heat shock protein HSP 90-alpha	84788.6	MOUSE	Heat shock protein HSP 90-alpha
489.794	4	-1.9	EMLQQSKILK	EMLQQSK(+DSS)ILK	NLVKK	NLVK(+DSS)K	O7062806_PU	20.157	15.4	0.2	4.9	9.2	69	26	0.6	2681	270	6.2	P07901	408	1	1	0	P07901	419	1	0	0	84788.6	MOUSE	Heat shock protein HSP 90-alpha	84788.6	MOUSE	Heat shock protein HSP 90-alpha
689.354	3	-8.4	YESLTDPSKLDSGK	YESLTDPSK(+DSS)LDSGK	TLR	(+DSS)-TLR	O7062805_GA	22.247	24.5	1.5	0.01	23	0.02	1	-4.4	5596	581	3.6	P11499	64	1	1	0	decoy	0	1	0	0	83281.9	MOUSE	Heat shock protein HSP 90-beta	83281.9	MOUSE	Heat shock protein HSP 90-beta
689.356	3	-5.1	YESLTDPSKLDSGK	YESLTDPSK(+DSS)LDSGK	TLR	(+DSS)-TLR	O6071510_GA	29.132	23.1	1.5	0.026	21.6	0.05	1	-4.4	3741	576	3.6	P11499	64	1	1	0	decoy	0	1	0	0	83281.9	MOUSE	Heat shock protein HSP 90-beta	83281.9	MOUSE	Heat shock protein HSP 90-beta
689.357	3	-4.5	YESLTDPSKLDSGK	YESLTDPSK(+DSS)LDSGK	TLR	(+DSS)-TLR	O7062004_GA	25.711	22.2	1.5	0.047	20.7	0.089	1	-4.4	3719	514	3.6	P11499	64	1	1	0	decoy	0	1	0	0	83281.9	MOUSE	Heat shock protein HSP 90-beta	83281.9	MOUSE	Heat shock protein HSP 90-beta
515.318	2	-2.3	KVEK	K(+DSS)VEK	TLR	(+DSS)-TLR	O7062806_PU	22.95	18	5.4	0.22	10.2	3.9	5	9	6.1	9	12.1	P11499	574	1	1	0	decoy	0	1	0	0	83281.9	MOUSE	Heat shock protein HSP 90-beta	83281.9	MOUSE	Heat shock protein HSP 90-beta
515.317	2	-2.5	KVEK	K(+DSS)VEK	TLR	(+DSS)-TLR	O7062807_PU	22.677	17.2	3.4	0.29	9.5	5.3	6	5.9	21	14	8.8	P11499	574	1	1	0	decoy	0	1	0	0	83281.9	MOUSE	Heat shock protein HSP 90-beta	83281.9	MOUSE	Heat shock protein HSP 90-beta
515.318	2	-1.3	TLR	(+DSS)-TLR	KVEK	K(+DSS)VEK	O7062805_GA	23.201	15.6	1.8	0.37	8.8	5.9	5	7.5	10	7	11	decoy	0	1	0	0	P11499	574	1	1	0	83281.9	MOUSE	Heat shock protein HSP 90-beta	83281.9	MOUSE	Heat shock protein HSP 90-beta
515.319	2	0.63	KVEK	K(+DSS)VEK	TLR	(+DSS)-TLR	O7062106_PU	21.816	15.6	2.8	0.45	7.9	7.8	6	7.1	11	8	9.9	P11499	574	1	1	0	decoy	0	1	0	0	83281.9	MOUSE	Heat shock protein HSP 90-beta	83281.9	MOUSE	Heat shock protein HSP 90-beta
1203.59	3	13	GEKEEEDKEDEEKPK	GEK(+DSS)EEEDKEDEEKPK	KVPSFEQNGKSEFR	K(+DSS)VPSFEQNGKSEFR	O7062106_PU	33.786	18.6	1.7	0.61	9.5	46	12	4	632	136	11.2	P11499	237	1	0	0	decoy	55	1	0	0	83281.9	MOUSE	Heat shock protein HSP 90-beta	83281.9	MOUSE	Heat shock protein HSP 90-beta
401.728	4	3.8	KMEESKAK	KMEESK(+DSS)AK	NVKR	NVK(+DSS)R	O7062807_PU	17.868	17.7	5.3	0.94	11.3	20	2	5.8	288	55	11.7	P11499	557	1	0	0	decoy	212	1	0	0	83281.9	MOUSE	Heat shock protein HSP 90-beta	83281.9	MOUSE	Heat shock protein HSP 90-beta
770.749	3	-15	QKAEADKNDKAVK	Q(Gln->pyro-Glu)K(+DSS)AEADKNDKAVK	KLNKDK	(+DSS)-KLNKDK	O6071510_GA	32.585	18	7.1	0.2	10.9	6.3	1	-0.2	1336	277	7.3	P11499	641	1	0	0	decoy	0	1	0	0	83281.9	MOUSE	Heat shock protein HSP 90-beta	84788.6	MOUSE	Heat shock protein HSP 90-alpha
873.169	3	-13	LVIGFDLIELEMAVKK	LVIGFDLIELEM(Oxidation)AVK(+DSS)K	DKKKK	DKK(+DSS)KK	O7062106_PU	36.372	15.5	3.7	1.4	10.8	13	2	2.6	698	161	9	decoy	328	1	0	0	P11499	266	1	0	0	84788.6	MOUSE	Heat shock protein HSP 90-alpha	83281.9	MOUSE	Heat shock protein HSP 90-beta
594.336	2	1.1	QEEKK	QEEK(+DSS)K	TLR	(+DSS)-TLR	O7062004_GA	21.891	16.7	5.2	0.97	9	14	2	0.1	295	75	7.7	P07901	565	1	0	0	decoy	0	1	0	0	84788.6	MOUSE	Heat shock protein HSP 90-alpha	83281.9	MOUSE	Heat shock protein HSP 90-beta
812.654	4	7.1	KHYLNTRENQDELVAMMK	K(+DSS)HYLNTRENQDELVAMMK	AEADKNDK	AEADK(+DSS)NDK	O7062806_PU	35.134	16.3	0	28	8.5	850	66	2.9	9809	381	11	decoy	588	1	0	0	P07901	655	1	1	0	84788.6	MOUSE	Heat shock protein HSP 90-alpha	84788.6	MOUSE	Heat shock protein HSP 90-alpha
514.825	2	-4	KNLK	K(+DSS)NLK	TLR	(+DSS)-TLR	O7062807_PU	11.005	18.2	0.8	0.11	12.3	2.1	5	4.6	96	47	10.1	decoy	547	1	0	0	decoy	0	1	0	0	83281.9	MOUSE	Heat shock protein HSP 90-beta	83281.9	MOUSE	Heat shock protein HSP 90-beta
1108.2	3	4.3	QNDKFQSELGDMGGEMVDGAR	Q(Gln->pyro-Glu)NDK(+DSS)FQSELGDMGGEMVDGAR	ARSSEKLK	ARSSEK(+DSS)LK	O7062004_GA	40.014	17.7	5.1	0.29	12.6	4.4	1	-1.8	9996	691	6.1	decoy	97	1	0	0	decoy	27	1	0	0	83281.9	MOUSE	Heat shock protein HSP 90-beta	83281.9	MOUSE	Heat shock protein HSP 90-beta
1088.07	2	6.9	AIMPKEAGTK	AIMPK(+DSS)EAGTK	QVADMKER	QVADM(Oxidation)K(+DSS)ER	O7062106_PU	31.789	16.1	2.1	0.36	14	0.86	1	3.1	81	45	8.5	decoy	339	1	0	0	decoy	17	1	0	0	83281.9	MOUSE	Heat shock protein HSP 90-beta	83281.9	MOUSE	Heat shock protein HSP 90-beta
509.974	3	3.7	KIVKDWGR	K(+DSS)IVKDWGR	TLR	(+DSS)-TLR	O7062806_PU	31.977	18	2.4	0.41	15.6	1	1	5	66	21	8.3	decoy	283	1	0	0	decoy	0	1	0	0	83281.9	MOUSE	Heat shock protein HSP 90-beta	83281.9	MOUSE	Heat shock protein HSP 90-beta
1088.07	2	5.3	AIMPKEAGTK	AIMPK(+DSS)EAGTK	QVADMKER	QVADM(Oxidation)K(+DSS)ER	O7062806_PU	33.374	15.1	1.3	0.47	13.8	0.82	1	2.4	98	45	7.7	decoy	339	1	0	0	decoy	17	1	0	0	83281.9	MOUSE	Heat shock protein HSP 90-beta	83281.9	MOUSE	Heat shock protein HSP 90-beta
1088.07	2	4.4	AIMPKEAGTK	AIMPK(+DSS)EAGTK	QVADMKER	QVADM(Oxidation)K(+DSS)ER	O7062807_PU	33.313	15.1	1.2	0.81	13.9	1.3	1	2.5	101	58	7.6	decoy	339	1	0	0	decoy	17	1	0	0	83281.9	MOUSE	Heat shock protein HSP 90-beta	83281.9	MOUSE	Heat shock protein HSP 90-beta
1070.53	3	11	TLRGTFESESKQVADMKER	TLRGTFESESK(+DSS)QVADMKER	QDDKEDK	Q(Gln->pyro-Glu)DDK(+DSS)EDK	O7062807_PU	31.764	15	1.7	2.3	13.3	5.3	1	-0.9	6778	466	6.9	decoy	11	1	0	0	decoy	78	1	0	0	83281.9	MOUSE	Heat shock protein HSP 90-beta	84788.6	MOUSE	Heat shock protein HSP 90-alpha
845.928	2	-12	MANEGEKK	MANEGEK(+DSS)K	GISDKK	GISDK(+DSS)K	O6071510_GA	27.411	16	1.1	2.5	7.1	40	38	4.1	102	70	8.9	decoy	498	1	0	0	decoy	723	1	0	0	83281.9	MOUSE	Heat shock protein HSP 90-beta	84788.6	MOUSE	Heat shock protein HSP 90-alpha
711.884	4	6.3	VMFEMLNITYVQKK	VMFEMLNITYVQK(+DSS)K	KTVMVEEK	K(+DSS)TVMVEEK	O7062106_PU	35.75	20.7	4.8	3.4	15.9	21	1	-0.1	9369	530	8	decoy	232	1	0	0	decoy	666	1	0	0	84788.6	MOUSE	Heat shock protein HSP 90-alpha	83281.9	MOUSE	Heat shock protein HSP 90-beta
987.845	3	-10	QDDKEDKGKMELLGLIYTK	Q(Gln->pyro-Glu)DDK(+DSS)EDKGKMELLGLIYTK	LNKDK	LNK(+DSS)DK	O7062106_PU	26.15	15.5	2.1	2.7	10.8	24	8	-1.8	8756	727	4.7	decoy	78	1	0	0	decoy	4	1	0	0	84788.6	MOUSE	Heat shock protein HSP 90-alpha	84788.6	MOUSE	Heat shock protein HSP 90-alpha

## Sheet: MS Sample log
Project	Set #	Run #
PU-H71 and GA-bound XL	PU-H71	O7062806
		O7062806
		O7062807
	GA	O6071510
		O7062004
		O7062805

## Sheet: PU-GA XL% quantitation 
Cross-linking (XL) percentage calculation of Hsp90 from PH-H71 or GA pull-down
Hsp90 alpha
								alpha-C distance (angstron)
XL Lys1	XL Lys2	PU XL%	STDEV		GA XL%	STDEV		closed	open
58	112	85.5	5.7		66.9	10.5		15.79	25.14
293	363	26.1	2.8		12	2.3		16.5	21.67
295	363	9.77035	0.906522		7.10301	1.72466		15.14	16.5
408	415	22.3	2.3		16.5	1		11.3	10.93
408	419	26.9	2.9		23.9	2.5		17.3	17.3
411	415	29.5	1.1		24	1		6.4	6.3
411	419	16.2	0.9		13.7	2.7		12.4	12.7
444	616	14.2	3.9		3.5	0.1		20.7	39.5
459	415	5.3	1.4		6	2.3		13.3	13.4
586	566	40.5	19.8		40.1	21.1		14	13.9
616	633	15.1	2.5		10.8	1.1		16.2	17.9
Hsp90 beta
53	107	86.9	6.7		66	7.7		15.7	25.14
399	410	28.9	2.5		25.8	1.8		17.2	17.3
399	406	23.1	2.5		17.1	1.2		11.2	10.99
402	406	22.8	1.2		20	1.1		6.4	6.3
402	410	20.4	1		19.1	2.9		12.4	12.7
435	347	28.1	8		14.4	3.6		17.8	15.96
435	607	9	0.4		3.9	2.8		20.3	43.5
577	557	50	15.5		50.6	4.9		13.9	16.1
624	607	36.8	2.7		31.4	7.4		16.1	18.4
623	568	29.7	9.5		25.3	4.2		14	15

## Sheet: XL Ion Intensity
hsp90a
								PU-H71				GA
AA 1	AA 2	m/z	z	ppm	RT			O7062106	O7062807	O7062806		O6071510	O7062004	O7062805
58	112	829.206	4	4.7	31.848			6580000	18000000	10500000		2290000	2000000	1840000
		829.456						9850000	32000000	17200000		4340000	3780000	3270000
		829.706						9420000	28900000	15200000		4110000	3600000	3160000
		829.956						6210000	18600000	10200000		2660000	2340000	1950000
58	112	1105.27	3	5.1	31.894			3790000	9510000	4430000		1990000	966000	697000
		1105.61						6140000	15800000	8230000		3020000	1490000	1290000
		1105.94						5260000	15600000	7460000		2870000	1720000	1270000
		1106.27						3570000	10500000	5140000		1780000	1100000	757000
	58	858.96	2	6	30.203			1940000	2400000	1310000		1680000	1990000	771000
		859.46						1840000	1990000	1340000		1460000	1920000	618000
		859.96						970000	1090000	727000		754000	1200000	354000
	112	886.498	2	5	32.467			3620000	4610000	3080000		2660000	3410000	1130000
		886.998						3510000	4700000	2970000		2880000	3240000	1020000
		887.498						1690000	2380000	1490000		1210000	1750000	491000
	58free	646.30-646.34	2		27			44200000	32700000	20000000		34200000	33800000	9550000
		520.92-520.96	3		34.3			33300000	14700000	7580000		9590000	29100000	3530000
				% Mod				2.44209	4.81928	4.53444		3.69474	3.06673	5.56639
								1.29808	3.93194	1.29808		4.10929	1.30037
					XL sum			50820000	148910000	78360000		23060000	16996000	14234000
					All Sum			64390000	166080000	89277000		33704000	30506000	18618000
					%			78.9253	89.6616	87.7718		68.4192	55.7136	76.4529
								85.4529	5.73149			66.8619	10.457
AA 1	AA 2	m/z	z	ppm	RT			O7062106	O7062807	O7062806 heat		O6071510	O7062004	O7062805
293	363	638.953	5					287000	758000	243000		110000	151000	61300
		639.153						511000	1140000	672000		308000	349000	82600
		639.353						344000	1050000	724000		230000	363000	70900
		639.553						329000	852000	319000		125000	211000	56900
293	363	798.441	4	5.2	25.482			523000	1080000	531000		219000	321000	94100
		798.691						736000	2130000	966000		442000	548000	123000
		798.941						878000	2060000	880000		417000	640000	115000
		799.191						414000	1380000	543000		216000	252000	88500
293	DSS1@9=14	730.723	3	4.4	26.296			1670000	3190000	2280000		1700000	2270000	797000
		731.056						1840000	4100000	2300000		1970000	2390000	744000
		731.389						1520000	2190000	1670000		1540000	1760000	517000
	363	588.346	2	5.1	27.767			2580000	5530000	3500000		4300000	5110000	1880000
		588.846						1700000	3890000	2080000		2870000	2730000	1190000
		589.346						667000	1010000	703000		1270000	972000	495000
						XL sum		4022000	10450000	4878000		2067000	2835000	692300
						All Sum		13999000	30360000	17411000		15717000	18067000	6315300
						%		28.7306	34.4203	28.0168		13.1514	15.6916	10.9623
								30.3892	3.5092			13.2684	2.36683
					All %			25.1895	29.257	23.8347		12.1134	14.1281	9.62945
								26.0937	2.82198			11.957	2.25339
AA 1	AA 2	m/z	z	ppm	RT			O7062106	O7062807	O7062806 heat		O6071510	O7062004	O7062805
363	295	515.304	4	3.7	24.192			305000	991000	654000		203000	408000	180000
		515.554						481000	1280000	679000		246000	495000	184000
		515.804						408000	845000	423000		202000	310000	150000
		516.054						185000	306000	202000		82800	127000	63100
363	295	686.738	3					240000	557000	332000		207000	285000	105000
		687.072						237000	884000	497000		257000	310000	124000
		687.405						112000	495000	268000		149000	64400	68000
363		588.346	2	5.1	27.767			2580000	5530000	3500000		4300000	5110000	1880000
		588.846						1700000	3890000	2080000		2870000	2730000	1190000
		589.346						667000	1010000	703000		1270000	972000	495000
	295	529.307	2	2.7	27.148			6490000	15400000	8710000		8070000	6350000	3070000
		529.807						3980000	8190000	4890000		4690000	3890000	1800000
		530.307						1140000	2680000	1620000		1700000	1250000	611000
					XL sum			1968000	5358000	3055000		1346800	1999400	874100
					All sum			18525000	42058000	24558000		24246800	22301400	9920100
					%			10.6235	12.7396	12.4399		5.55455	8.96536	8.8114
								11.9343	1.14506			7.7771	1.92633
					All %			8.72843	10.2042	10.3784		5.11823	7.9542	8.23659
								9.77035	0.906522			7.10301	1.72466
AA 1	AA 2	m/z	z	ppm	RT			O7062106	O7062807	O7062806 heat		O6071510	O7062004	O7062805
408	419	489.796	4	2.8	23.933			9890000	12000000	6190000		5120000	6490000	1410000
second peak		490.046						10800000	13400000	6640000		5100000	7260000	1680000
		490.296						6790000	8120000	3870000		3150000	4260000	988000
		490.546						2790000	3220000	1670000		1380000	1820000	361000
408	419	652.728	3	3.7	21.532			3650000	5420000	2720000		2960000	2550000	525000
		653.061						3880000	5870000	3010000		3250000	247000	694000
		653.394						2690000	3860000	1650000		1990000	1700000	365000
		653.728						1040000	1290000	894000		876000	799000	143000
408		687.391	2	3.4	27.705			10500000	10800000	7330000		7470000	9640000	2110000
		687.891						8770000	7710000	5430000		6030000	7290000	1650000
		688.391						3730000	3540000	2150000		2510000	3560000	4520000
	419	379.245	2	1.7	20.835			14300000	8810000	5530000		9430000	9190000	820000
		379.745						5330000	3240000	2040000		3620000	3720000	321000
		380.245						989000	808000	398000		835000	843000	80100
				XL sum				41530000	53180000	26644000		23826000	25126000	6166000
				All sum				85149000	88088000	49522000		53721000	59369000	15667100
				%				48.7733	60.3714	53.8024		44.3514	42.3218	39.3564
								54.3157	5.81608			42.0098	2.51207
				All %				25.6893	30.1857	28.0927		26.99	23.3256	24.5152
								27.9892	2.25001			24.9436	1.86936
AA 1	AA 2	m/z	z	ppm	RT			O7062106	O7062807	O7062806 heat		O6071510	O7062004	O7062805
408	415	489.796	4	2.8	23.933			6360000	9430000	4540000		3140000	3850000	969000
first peak		490.046						7940000	10300000	4840000		3420000	4200000	894000
		490.296						4690000	5340000	3180000		1850000	2750000	630000
		490.546						1810000	2440000	1270000		925000	1210000	269000
408	415	652.728	3	3.7	21.532			2760000	4620000	2230000		1080000	1390000	460000
		653.061						2970000	5290000	2550000		1130000	1600000	398000
		653.394						1860000	2680000	1400000		850000	1160000	292000
		653.728						1100000	1270000	852000		447000	396000	136000
408		687.391	2	3.4	27.705			10500000	10800000	7330000		7470000	9640000	2110000
		687.891						8770000	7710000	5430000		6030000	7290000	1650000
		688.391						3730000	3540000	2150000		2510000	3560000	4520000
	415	379.245	2	1.7	20.835			7970000	5520000	3680000		7600000	5360000	747000
fist peak		379.745						2930000	2230000	1560000		2890000	2110000	274000
		380.245						636689	484579	338988		627997	458503	59540.2
				XL sum				29490000	41370000	20862000		12842000	16556000	4048000
				All sum				64026689	71654579	41350988		39969997	44974503	1.34085e+07
				%				46.0589	57.7353	50.451		32.1291	36.812	30.1897
								51.4151	5.8976			33.0436	3.40452
				All %				19.9097	24.3986	22.7386		15.4839	17.5507	16.5738
								22.349	2.26967			16.5361	1.03395
AA 1	AA 2	m/z	z	ppm	RT			O7062106	O7062807	O7062806 heat		O6071510	O7062004	O7062805
408	419	493.794	4	2.2	22.576			2490000	2070000	1230000		910000	1470000	280000
seocond peak		494.044						2500000	2360000	1290000		536000	1660000	323000
		494.294						1770000	1050000	723000		770000	1070000	174000
		494.544						687000	512000	277000		164000	498000	88900
408	419	658.059	3	4.8	23.653			789000	791000	400000		401000	494000	167000
		658.392						914000	900000	569000		673000	563000	153000
		658.726						530000	459000	326000		243000	391000	126000
		659.059						288000	258000	188000		120000	163000	52900
408	oxi	695.387	2	0.19	30.144			2280000	1690000	1250000		634000	2110000	402000
		695.887						1780000	1450000	896000		563000	1190000	309000
		696.387						739000	447000	416000		2480000	520000	275000
	419	379.246	2	3.3	21.33			14300000	8810000	5530000		9430000	9190000	820000
second peak		379.746						5330000	3240000	2040000		3620000	3720000	321000
		380.246						989000	808000	398000		835000	843000	80100
				XL sum				9968000	8400000	5003000		3817000	6309000	1364800
				All sum				35386000	24845000	15533000		21379000	23882000	3571900
				%				28.1693	33.8096	32.2088		17.854	26.4174	38.2094
								31.3959	2.90669			27.4936	10.2203
				All %				8.46295	7.18403	7.97466		6.05251	8.38247	9.83413
								7.87388	0.645388			8.0897	1.90773
				+oxi %				29.6927	33.02	31.1011		29.4947	27.28	27.7284
								31.2713	1.67018			28.1677	1.17086
XLink AA 1	XLink AA 2	m/z	z	ppm	RT			O7062106	O7062807	O7062806		O6071510	O7062004	O7062805
408	415	493.792	4	-2.1	21.154			1490000	1520000	983000		447000	707000	237000
first peak		494.042						1860000	1880000	1130000		487000	932000	276000
oxi		494.292						1050000	981000	573000		242000	655000	162000
		494.542						661000	585000	358000		177000	300000	61800
408	415	658.056	3					668000	686000	394000		102000	388000	104000
		658.39						713000	557000	558000		194000	387000	96400
		658.723						356000	410000	269000		52500	225000	57800
		659.056						177000	111000	85200		66200	98200	26500
408	oxi	695.387	2	0.19	30.144			2280000	1690000	1250000		634000	2110000	402000
		695.887						1780000	1450000	896000		563000	1190000	309000
		696.387						739000	447000	416000		2480000	520000	275000
	415	379.245	2	0.14	22.471			7970000	5520000	3680000		7590000	5320000	747000
		379.745						2930000	2230000	1560000		2890000	2110000	274000
		380.245						7450000	4310000	2990000		655000	2050000	92500
				XL sum				6975000	6730000	4350200		1767700	3692200	1021500
				All sum				30124000	22377000	15142200		16579700	16992200	3121000
				%				23.1543	30.0755	28.729		10.6618	21.7288	32.7299
								27.3196	3.66955			21.7068	11.034
				All %				8.50405	7.12215	8.76752		4.93757	7.8396	9.95381
								8.13124	0.883775			7.57699	2.51841
				+oxi %				22.3869	26.4947	25.3868		16.1555	19.3834	18.9337
								24.7561	2.12529			18.1575	1.74838
AA 1	AA 2	m/z	z	ppm	RT			O7062106	O7062807	O7062806 heat		O6071510	O7062004	O7062805
411	415	370.756	4	3.3	24.05			8320000	8270000	4190000		5000000	4770000	742000
first peak		371.006						8130000	7000000	3880000		4290000	4350000	710000
		371.256						3570000	3640000	1750000		1870000	1890000	256000
		371.506						1070000	1140000	634000		507000	767000	115000
411	415	494.006	3	2.9	23.62			5260000	5360000	2550000		1550000	2360000	453000
		494.339						3760000	4100000	1940000		1460000	2240000	342000
		494.672						1820000	1860000	883000		678000	955000	198000
		495.006						494000	477000	328000		214000	287000	59100
411		449.312	2	4	27.575			12100000	11400000	7290000		12500000	9310000	1870000
		449.812						6590000	6350000	3420000		6470000	4670000	914000
		450.312						1660000	1720000	898000		1710000	1440000	267000
	415	379.246	2	3.3	21.33			7970000	5520000	3680000		7600000	5360000	747000
first peak		379.746						2930000	2230000	1560000		2890000	2110000	274000
		380.246						636689	484579	338988		627997	458503	59540.2
				XL sum				32424000	31847000	16155000		15569000	17619000	2875100
				All sum				64310689	59551579	33341988		47366997	40967503	7.00664e+06
				%				50.4177	53.478	48.4524		32.8689	43.0073	41.0339
								50.7827	2.5326			38.97	5.37508
				All %				29.9276	30.4466	28.2686		23.2262	25.1182	23.7613
								29.5476	1.13763			24.0352	0.975298
AA 1	AA 2	m/z	z	ppm	RT			O7062106	O7062807	O7062806 heat		O6071510	O7062004	O7062805
411	419	370.756	4	3.3	24.05			9410000	8270000	4190000		5000000	6390000	859000
second peak		371.006						8030000	7200000	4170000		3940000	5900000	786000
		371.256						3590000	3450000	1690000		1800000	2250000	342000
		371.506						977000	1160000	553000		555000	909000	113000
411	419	494.006	3	2.9	23.62			4940000	5360000	2370000		2160000	3240000	432000
		494.339						4090000	4290000	2110000		1690000	2470000	329000
		494.672						2250000	1800000	906000		718000	1010000	189000
		495.006						606000	641000	220000		229000	395000	68800
411		449.312	2	4	27.575			12100000	11400000	7290000		12500000	9310000	1870000
		449.812						6590000	6350000	3420000		6470000	4670000	914000
		450.312						1660000	1720000	898000		1710000	1440000	267000
	419	379.246	2	3.3	21.33			14300000	8810000	5530000		9430000	9190000	820000
second peak		379.746						5330000	3240000	2040000		3620000	3720000	321000
		380.246						989000	808000	398000		835000	843000	80100
				XL sum				33893000	32171000	16209000		16092000	22564000	3118800
				All sum				74862000	64499000	35785000		50657000	51737000	7390900
				%				45.274	49.8783	45.2955		31.7666	43.6129	42.1978
								46.8159	2.65211			39.1924	6.46978
				All %				16.7453	16.6833	15.2247		13.0022	16.7099	11.4251
								16.2178	0.860558			13.7124	2.71304
AA 1	AA 2	m/z	z	ppm	RT			O7062106	O7062807	O7062806 heat		O6071510	O7062004
444	616	593.579	4	4.5	26.498			1930000	5150000	2560000		547000	660000
		593.829						3040000	7440000	3480000		723000	885000
		594.079						2410000	5950000	2800000		541000	344000
		594.329						1360445	3358775	1580600		305394	194188
444	616	791.106	3	4.9	23.507			829000	2410000	1080000		178000	307000
		791.439						1260000	3340000	1510000		249000	239000
		791.772						873000	2470000	1130000		151000	151000
		792.106						308000	1360000	544000		128000	103000
444		730.38	2	4.5	29.001			42900000	44500000	23200000		27600000	27000000
		730.88						35900000	36200000	18600000		23600000	21800000
		731.38						15300000	16700000	8780000		11000000	10200000
	616	543.822	2	2.7	24.924			6900000	21200000	10700000		8190000	9190000
		544.322						4730000	12500000	6570000		4760000	5370000
		544.822						1360000	4220000	2160000		1450000	1740000
				XL sum				12010445	31478775	14684600		2.82239e+06	2883188
				All sum				119100445	166798775	84694600		7.94224e+07	78183188
				%				10.0843	18.8723	17.3383		3.55365	3.68773
									1.08471			3.62069	0.0948112
				All %				9.73862	16.9354	15.8789		3.42296	3.49729
								14.1843	3.88615			3.46012	0.0525582
AA 1	AA 2	m/z	z	ppm	RT			O7062106	O7062807	O7062806 heat		O6071510	O7062004	O7062805
459	415	400.008	4	3.9	22.018			709000	1360000	715000		338000	702000	151000
		400.258						730979	1430000	807000		345000	805000	344000
		400.508						290000	593000	298000		171000	258000	63200
		400.758						142825	242000	144000		50300	87600	90800
459	415	533.008	3	3.2	22.03			558000	1070000	641000		384000	535000	130000
		533.341						518940	919000	352000		301000	375000	114000
		533.675						213000	533000	290000		216000	158000	60000
459		507.813	2	-1.4	31.388			1430000	2580000	1510000		1440000	2020000	757000
		508.313						707000	1530000	885000		837000	1070000	398000
		508.813						346000	429000	245000		244000	307000	120000
	415	379.246	2	3.3	21.33			7970000	5520000	3680000		7600000	5360000	747000
		379.746						2930000	2230000	1560000		2890000	2110000	274000
		380.246						636689	484579	338988		627997	458503	59540.2
				XL sum				3162744	6147000	3247000		1805300	2920600	953000
				All sum				17182433	18920579	11465988		15444297	14246103	3.30854e+06
				%				18.4068	32.4884	28.3185		11.6891	20.501	28.8042
								26.4046	7.23327			20.3315	8.55883
				All %				3.67456	6.21741	6.14576		3.957	5.60433	8.46875
								5.34591	1.44788			6.01002	2.28307
AA 1	AA 2	m/z	z	ppm	RT			O7062106	O7062807	O7062806 heat		O6071510	O7062004	O7062805
586	566	514.979	3	1.5	16.321			364000	2720000	1140000		287000	287000	491000
		515.314						278000	1980000	982000		271000	290000	439000
		515.649						136000	914000	524000		118000	210000	300000
586	566	386.488	4	4.7	15.065			466000	2630000	1160000		326000	494000	577000
		386.735						380955	2150000	948300		266505	403845	471698
		386.986						186000	949000	467000		105000	180000	215000
586		593.347	2	3.2	23.165			472000	2060000	7780000		417000	476000	595000
		593.849						310340	1354450	5115350		274178	312970	391212
		594.354						157653	688061	2.5986e+06		139282	158989	198736
	566 (KTK)	532.326			24.4			1790000	2220000	1550000		4400000	1200000	389000
		533.33						465000	602000	286000		1090000	375000	98000
				XL sum				1810955	11343000	5221300		1373505	1864845	2.4937e+06
				All sum				5.00595e+06	1.82675e+07	2.25512e+07		7.69396e+06	4.3878e+06	4.16565e+06
				%				36.1761	62.0938	23.153		17.8517	42.5006	59.8634
								40.4743	19.823			40.0719	21.1109
				All %
AA 1	AA 2	m/z	z	ppm	RT			O7062106	O7062807	O7062806 heat		O6071510	O7062004	O7062805
633	616	597.34	5	4.6	24.355			118240	2800000	1110000		104462	119242	311000
		597.54						734000	3730000	1680000		647000	906000	369000
		597.74						920000	3290000	1220000		608000	967000	360000
		597.94						698000	1870000	763000		343000	466000	214000
		598.14						239000	1040000	330000		151000	187000	97000
633	616	746.429	4	12	24.326			221340	1140800	465000		230020	239320	130820
		746.679						357000	1840000	750000		371000	386000	211000
		746.929						450000	1720000	675000		293000	549000	260000
		747.179						250000	1070000	473000		147000	214000	107000
		747.429						240000	576000	318000		138000	224000	0
633		517.534	4	-3.5	22.782			2560000	3790000	2020000		1880000	2450000	543000
		517.784						2630000	4260000	2230000		2130000	3160000	598000
		518.034						1550000	2270000	1700000		1260000	2020000	393000
		518.284						749000	1410000	1220000		562000	566000	220000
633		689.713	3					1320000	1930000	1290000		1570000	1300000	414000
		690.046						1480000	2120000	1520000		1910000	1330000	428000
		690.379						1150000	1520000	853000		1110000	871000	285000
		690.713						690000	736000	563000		588000	509000	134000
	616	543.822	2	2.7	24.924			7530000	21200000	10700000		8190000	9190000	5190000
		544.322						4150000	12500000	6570000		4760000	5370000	2960000
		544.822						1360000	4220000	2160000		1450000	1740000	989000
				XL sum				4.22758e+06	19076800	7784000		3.03248e+06	4.25756e+06	2059820
				All sum				2.93966e+07	75032800	38610000		2.84425e+07	3.27636e+07	14213820
				%				14.3812	25.4246	20.1606		10.6618	12.9948	14.4917
								19.9888	5.52371			12.7161	1.93009
				All %				10.2098	17.9105	14.6056		9.69932	11.9438	14.4917
								14.242	3.86322			12.0449	2.39777
hsp90b
												GA
XLink AA 1	XLink AA 2	m/z	z	ppm	RT			O7062106	O7062807	O7062806		O6071510	O7062004	O7062805
53	107	825.206	4	3.8	32.797			5970000	22800000	11500000		2380000	1960000	1380000
		825.456						9190000	36600000	20700000		3780000	3230000	2280000
		825.706						8810000	33600000	18400000		3660000	3320000	2260000
		825.956						5930000	24400000	11900000		2310000	2300000	1250000
		826.206						3080000	12300000	6430000		1280000	1020000	732000
53	107	1099.94	3	4.9	32.807			3160000	11600000	6040000		1960000	924000	767000
		1100.27						5370000	22200000	10800000		3370000	1570000	1190000
		1100.61						5040000	18900000	9760000		3140000	1570000	1130000
		1100.94						3410000	13300000	6370000		2090000	1130000	842000
53		850.96	2	3.9	31.936			1770000	2530000	1790000		2510000	1420000	700000
		851.46						1620000	2370000	1550000		2250000	1440000	593000
		851.96						818000	1090000	686000		1020000	831000	269000
	107	886.498	2	5	32.467			3626000	4610000	3080000		2660000	3410000	1130000
		886.998						3510000	4700000	2970000		2880000	3240000	1020000
		887.498						1690000	2380000	1490000		1210000	1750000	491000
				XL sum				49960000	195700000	101900000		23970000	17024000	11831000
				All sum				62994000	213380000	113466000		36500000	29115000	16034000
				%				79.3091	91.7143	89.8066		65.6712	58.4716	73.787
								86.9434	6.67988			65.9766	7.66225
AA 1	AA 2	m/z	z	ppm	RT			O7062106	O7062807	O7062806 heat		O6071510	O7062004	O7062805
399	410	489.796	4	2.8	23.933			9890000	12000000	6190000		5120000	6490000	1410000
second peak		490.046						10800000	13400000	6640000		5100000	7260000	1680000
		490.296						6790000	8120000	3870000		3150000	4260000	988000
		490.546						2790000	3220000	1670000		1380000	1820000	361000
399	410	652.728	3	3.7	21.532			3650000	5420000	2720000		2960000	2550000	525000
		653.061						3880000	5870000	3010000		3250000	247000	694000
		653.394						2690000	3860000	1650000		1990000	1700000	365000
		653.728						1040000	1290000	894000		876000	799000	143000
399		687.391	2	3.4	27.705			10500000	10800000	7330000		7470000	9640000	2110000
		687.891						8770000	7710000	5430000		6030000	7290000	1650000
		688.391						3730000	3540000	2150000		2510000	3560000	4520000
	410	379.245	2	1.7	20.835			14300000	8810000	5530000		9430000	9190000	820000
		379.745						5330000	3240000	2040000		3620000	3720000	321000
		380.245						989000	808000	398000		835000	843000	80100
				XL sum				41530000	53180000	26644000		23826000	25126000	6166000
				All sum				85149000	88088000	49522000		53721000	59369000	15667100
				%				48.7733	60.3714	53.8024		44.3514	42.3218	39.3564
								54.3157	5.81608			42.0098	2.51207
				All %				26.2019	31.277	29.0886		27.5534	23.9756	25.7367
								28.8558	2.54556			25.7553	1.78896
AA 1	AA 2	m/z	z	ppm	RT			O7062106	O7062807	O7062806 heat		O6071510	O7062004	O7062805
399	406	489.796	4	2.8	23.933			6360000	9430000	4540000		3140000	3850000	969000
first peak		490.046						7940000	10300000	4840000		3420000	4200000	894000
		490.296						4690000	5340000	3180000		1850000	2750000	630000
		490.546						1810000	2440000	1270000		925000	1210000	269000
399	406	652.728	3	3.7	21.532			2760000	4620000	2230000		1080000	1390000	460000
		653.061						2970000	5290000	2550000		1130000	1600000	398000
		653.394						1860000	2680000	1400000		850000	1160000	292000
		653.728						1100000	1270000	852000		447000	396000	136000
399		687.391	2	3.4	27.705			10500000	10800000	7330000		7470000	9640000	2110000
		687.891						8770000	7710000	5430000		6030000	7290000	1650000
		688.391						3730000	3540000	2150000		2510000	3560000	4520000
	406	379.245	2	1.7	20.835			7970000	5520000	3680000		7600000	5360000	747000
fist peak		379.745						2930000	2230000	1560000		2890000	2110000	274000
		380.245						636689	484579	338988		627997	458503	59540.2
				XL sum				29490000	41370000	20862000		12842000	16556000	4048000
				All sum				64026689	71654579	41350988		39969997	44974503	1.34085e+07
				%				46.0589	57.7353	50.451		32.1291	36.812	30.1897
								51.4151	5.8976			33.0436	3.40452
				All %				20.3441	25.3164	23.5728		15.8284	18.1115	17.2467
								23.0778	2.52284			17.0622	1.15267
XLink AA 1	XLink AA 2	m/z	z	ppm	RT			O7062106	O7062807	O7062806		O6071510	O7062004	O7062805
399	406	493.792	4	-2.1	21.154			1490000	1520000	983000		447000	707000	237000
first peak		494.042						1860000	1880000	1130000		487000	932000	276000
oxi		494.292						1050000	981000	573000		242000	655000	162000
		494.542						661000	585000	358000		177000	300000	61800
399	406	658.056	3					668000	686000	394000		102000	388000	104000
		658.39						713000	557000	558000		194000	387000	96400
		658.723						356000	410000	269000		52500	225000	57800
		659.056						177000	111000	85200		66200	98200	26500
399	oxi	695.387	2	0.19	30.144			2280000	1690000	1250000		634000	2110000	402000
		695.887						1780000	1450000	896000		563000	1190000	309000
		696.387						739000	447000	416000		2480000	520000	275000
	406	379.245	2	0.14	22.471			7970000	5520000	3680000		7590000	5320000	747000
		379.745						2930000	2230000	1560000		2890000	2110000	274000
		380.245						7450000	4310000	2990000		655000	2050000	92500
				XL sum				6975000	6730000	4350200		1767700	3692200	1021500
				All sum				30124000	22377000	15142200		16579700	16992200	3121000
				%				23.1543	30.0755	28.729		10.6618	21.7288	32.7299
								27.3196	3.66955			21.7068	11.034
				All %				6.83783	6.47153	7.61027		3.62176	6.42388	9.14651
								6.97321	0.581319			6.39738	2.76247
				#NAME?				22.8302	27.4233	26.2449		16.4845	19.941	19.8173
								25.4994	2.38554			18.7476	1.96084
XLink AA 1	XLink AA 2	m/z	z	ppm	RT			O7062106	O7062807	O7062806		O6071510	O7062004	O7062805
399	410	493.793	4	-0.27	21.542			2490000	2070000	1230000		910000	1470000	280000
second peak		494.043						2500000	2360000	1290000		536000	1660000	323000
oxi		494.293						1770000	1050000	723000		770000	1070000	174000
		494.543						687000	512000	277000		164000	498000	88900
399	410	658.057	3					789000	791000	400000		401000	494000	104000
		658.391						914000	900000	569000		673000	563000	96400
		658.724						530000	459000	326000		243000	391000	57800
		659.057						288000	258000	188000		120000	163000	0
399	oxi	695.387	2	0.19	30.144			2280000	1690000	1250000		634000	2110000	402000
		695.887						1780000	1450000	896000		563000	1190000	309000
		696.387						739000	447000	416000		2480000	520000	275000
	410	379.245	2	1.7	20.835			14300000	8810000	5530000		9600000	9190000	893000
		379.745						5330000	3240000	2040000		3620000	3720000	321000
		380.245						989000	808000	398000		835000	843000	80100
				XL sum				9968000	8400000	5003000		3817000	6309000	1124100
				All sum				35386000	24845000	15533000		21549000	23882000	3404200
				%				28.1693	33.8096	32.2088		17.7131	26.4174	33.021
								31.3959	2.90669			25.7172	7.67791
				All %				8.46295	7.18403	7.97466		6.03624	8.38247	8.19883
								7.87388	0.645388			7.53918	1.30482
				#NAME?				30.2442	34.1455	32.1263		30.074	27.9894	28.0761
								32.172	1.95104			28.7132	1.17928
XLink AA 1	XLink AA 2	m/z	z	ppm	RT			O7062106	O7062807	O7062806		O6071510	O7062004	O7062805
402	406	370.756	4	3.3	24.05			8320000	8270000	4190000		5000000	4770000	742000
first peak		371.006						8130000	7000000	3880000		4290000	4350000	710000
		371.256						3570000	3640000	1750000		1870000	1890000	256000
		371.506						1070000	1140000	634000		507000	767000	115000
402	406	494.006	3	2.9	23.62			5260000	5360000	2550000		1550000	2360000	453000
		494.339						3760000	4100000	1940000		1460000	2240000	342000
		494.672						1820000	1860000	883000		678000	955000	198000
		495.006						494000	477000	328000		214000	287000	59100
402		449.312	2	4	27.575			12100000	11400000	7290000		12500000	9310000	1870000
		449.812						6590000	6350000	3420000		6470000	4670000	914000
		450.312						1660000	1720000	898000		1710000	1440000	267000
	406	379.246	2	3.3	21.33			7970000	5520000	3680000		7600000	5360000	747000
first peak		379.746						2930000	2230000	1560000		2890000	2110000	274000
		380.246						636689	484579	338988		627997	458503	59540.2
				XL sum				32424000	31847000	16155000		15569000	17619000	2875100
				All sum				64310689	59551579	33341988		47366997	40967503	7.00664e+06
				%				50.4177	53.478	48.4524		32.8689	43.0073	41.0339
								50.7827	2.5326			38.97	5.37508
				All %				24.0769	22.7767	21.6082		19.9427	21.0302	18.9214
								22.8206	1.2349			19.9648	1.05453
XLink AA 1	XLink AA 2	m/z	z	ppm	RT			O7062106	O7062807	O7062806		O6071510	O7062004	O7062805
402	410	494.005	3	0.51	22.241			9410000	8270000	4190000		5000000	6390000	859000
second peak		494.338						8030000	7200000	4170000		3940000	5900000	786000
		494.671						3590000	3450000	1690000		1800000	2250000	342000
		495.005						977000	1160000	553000		555000	909000	113000
402	410	370.755	4	-0.49	22.182			4940000	5360000	2370000		2160000	3240000	432000
		371.005						4090000	4290000	2110000		1690000	2470000	329000
		371.255						2250000	1800000	906000		718000	1010000	189000
		371.505						606000	641000	220000		229000	395000	68800
402		449.31	2	-0.27	29.843			12100000	11400000	7290000		12500000	9310000	1870000
		449.81						6590000	6350000	3420000		6470000	4670000	914000
		450.31						1660000	1720000	898000		1710000	1440000	267000
	410	379.245	2	1.7	20.835			14300000	8810000	5530000		9430000	9190000	820000
		379.745						5330000	3240000	2040000		3620000	3720000	321000
		380.245						989000	808000	398000		835000	843000	80100
				XL sum				33893000	32171000	16209000		16092000	22564000	3118800
				All sum				74862000	64499000	35785000		50657000	51737000	7390900
				%				45.274	49.8783	45.2955		31.7666	43.6129	42.1978
								46.8159	2.65211			39.1924	6.46978
				All %				21.3453	20.3709	19.3918		17.143	22.3869	17.7648
								20.3694	0.97679			19.0982	2.86499
XLink AA 1	XLink AA 2	m/z	z	ppm	RT			O7062106	O7062807	O7062806		O6071510	O7062004	O7062805
435	347	550.495	5					316000	698000	342000		55600	158000	47100
		550.695						570000	1240000	450000		67300	272000	97400
		550.895						371000	906000	401000		78800	304000	74900
		551.095						194000	580000	363000		0	112000	50700
435	347	687.868	4	4.2	31.129			680000	2800000	1250000		623000	721000	112000
		688.118						1330000	4700000	2210000		1040000	1040000	292000
		688.368						926000	4100000	1960000		785000	821000	233000
		688.618						827000	2130000	890000		422000	603000	151000
435	347	916.824	3	6.5	31.129			591000	1260000	698000		257000	231000	63300
		917.157						775000	1720000	965000		473000	352000	119000
435		701.869	2	3.4	30.046			21600000	27400000	15100000		23400000	18500000	4780000
		702.369						17200000	23200000	13400000		18500000	16200000	3670000
		702.869						6930000	10000000	5190000		8630000	7240000	1590000
	347	507.61	3	4.3	33.56			1570000	1900000	1510000		1220000	1430000	412000
		507.941						1550000	1510000	1260000		919000	1190000	346000
		508.275						611000	822000	339000		465000	517000	172000
				XL sum				6580000	20134000	9529000		3801700	4614000	1240400
				All sum				56041000	84966000	46328000		56935700	49691000	12210400
				%				11.7414	23.6965	20.5686		6.67718	9.28538	10.1586
								18.6688	6.19984			8.70704	1.81131
435	347	648.842	4	2.5	32.437			1000000	3530000	1740000		427000	548000	247000
		649.092						1850000	4740000	3160000		703000	1240000	354000
		649.342						1230000	3710000	1590000		634000	809000	250000
		649.592						709000	2060000	1210000		289000	535000	110000
435	347	864.789	3					437000	2340000	1120000		288000	330000	161000
		865.122						605000	3380000	1650000		389000	435000	230000
		865.456						459000	2200000	1140000		269000	478000	150000
		865.789						0	1070000	571000		0	33.5	121000
435		701.869	2	3.4	30.046			21600000	27400000	15100000		23400000	18500000	4780000
		702.369						17200000	23200000	13400000		18500000	16200000	3670000
		702.869						6930000	10000000	5190000		8630000	7240000	1590000
	347	682.861	2	4.3	33.56			1160000	1400000	661000		1190000	862000	275000
		683.361						640000	1290000	565000		800000	661000	229000
		683.861						425000	428000	381000		356000	261000	80400
				XL sum				6290000	23030000	12181000		2999000	4.37503e+06	1623000
				All sum				54245000	86748000	47478000		55875000	4.8099e+07	12247400
				%				11.5955	26.5482	25.6561		5.36734	9.09589	13.2518
								21.2666	8.38725			9.23834	3.94416
					%			72.2654	76.9817	76.4157		69.5324	71.2522	71.9736
				All %				18.9738	33.6493	31.7268		10.3198	15.4681	17.3689
								28.1166	7.97606			14.3856	3.64709
AA 1	AA 2	m/z	z	ppm	RT			O7062106	O7062807	O7062806 heat		O6071510	O7062004	O7062805
435	607	579.324	4	4.2	27.496			595000	2790000	1480000		496000	390000	320000
		579.574						697000	3640000	2160000		622000	429000	465000
		579.824						575000	2880000	1360000		514000	438000	315000
		580.074						217000	1300000	668000		215000	101000	175000
435	607	772.096	3	4.2	24.387			343000	1550000	771000		401000	287000	205000
		772.429						421410	1.90433e+06	947251		492669	352608	251863
		772.762						242000	1760000	526000		499000	151000	191000
		773.096						183920	1337600	399760		379240	114760	145160
435		701.869	2	3.4	30.046			21600000	27400000	15100000		23400000	18500000	4780000
		702.369						17200000	23200000	13400000		18500000	16200000	3670000
		702.869						6930000	10000000	5190000		8630000	7240000	1590000
	607	543.822	2	2.7	24.924			7530000	21200000	10700000		8190000	9190000	5190000
		544.322						4150000	12500000	6570000		4760000	5370000	2960000
		544.822						1360000	4220000	2160000		1450000	1740000	989000
				XL sum				3.27433e+06	17161930	8.31201e+06		3.61891e+06	2.26337e+06	2068023
				All sum				6.20443e+07	115681930	6.1432e+07		6.85489e+07	6.05034e+07	21247023
				%				5.2774	14.8354	13.5304		5.27931	3.7409	9.73324
								11.2144	5.18285			6.25115	3.11214
				All %				3.81778	9.43796	8.72176		4.28333	2.7988	7.62915
								7.32584	3.0591			4.90376	2.47422
AA 1	AA 2	m/z	z	ppm	RT			O7062106	O7062807	O7062806 heat		O6071510	O7062004	O7062805
577	557	502.022	4	2.4	17.314			440000	2250000	1270000		657000	383000	473000
		502.272						543000	2340000	1300000		603000	388000	514000
		502.522						237000	1660000	644000		412000	208000	278000
		502.772						83700	586000	368000		139000	155000	152000
577	557	669.03	3					899000	1130000	480000		301000	463000	175000
		669.363						726000	1190000	323000		269000	644000	144000
		669.697						457000	785000	243000		163000	340000	84200
		670.03						325000	282000	124000		76700	101000	31100
577		601.345	2	2.5	21.297			1260000	2350000	1370000		1120000	958000	655000
		601.845						720000	1470000	1030000		627000	576000	389000
		602.345						189000	600000	309000		199000	212000	158000
	557	489.742	2	-4.2	14.932			7930000	12300000	450000		723000	339000	164000
		490.242						1480000	3720000	205000		325000	243000	95800
		490.742						569000	1080000	0		58500	385000	0
				XL sum				3710700	10223000	4752000		2620700	2682000	1851300
				All sum				15858700	31743000	8116000		5673200	5395000	3313100
				%				23.3985	32.2055	58.551		46.1944	49.7127	55.8782
								38.0517	18.2909			50.5951	4.90183
AA 1	AA 2	m/z	z	ppm	RT			O7062106	O7062807	O7062806 heat		O6071510	O7062004	O7062805
624	607	596.54	5					1080000	5050000	2380000		963000	768000	356000
		596.74						1790000	7910000	3400000		1400000	1400000	694000
		596.94						1740000	7790000	3030000		1390000	1200000	559000
		597.14						1000000	4600000	2070000		713000	765000	405000
624	607	745.425	4	6.4	23.398			532000	2400000	1100000		411000	459000	237000
		745.675						1060000	3680000	1680000		593000	694000	387000
		745.925						687000	3670000	1620000		648000	475000	313000
		746.175						452000	2380000	861000		495000	376000	173000
624		517.534	4	-3.5	22.782			2560000	3790000	2020000		1880000	2450000	543000
		517.784						2530000	4260000	2230000		2130000	3160000	598000
		518.034						1550000	2270000	1700000		1260000	2020000	393000
		518.284						691966	1.0134e+06	758931		562502	901789	175447
		689.713	3					1320000	1930000	1290000		1570000	1300000	414000
		690.046						1480000	2120000	1520000		1910000	1330000	428000
		690.379						1150000	1520000	853000		1110000	871000	285000
		690.713						690000	736000	563000		588000	509000	134000
	607	543.823	2	4.2	22.218			7530000	21200000	10700000		8190000	9190000	5190000
		544.323						4150000	12500000	6570000		4760000	5370000	2960000
		544.823						1360000	4220000	2160000		1450000	1740000	989000
				XL sum				1.0851e+07	2.29934e+07	12159931		9.1385e+06	1.13768e+07	2.99645e+06
				All sum				2.7211e+07	6.52894e+07	34525931		2.71465e+07	3.03868e+07	1.29824e+07
				%				39.8772	35.2177	35.2197		33.6636	37.4399	23.0808
								36.7715	2.68959			31.3948	7.4436
AA 1	AA 2	m/z	z	ppm	RT			O7062106	O7062807	O7062806 heat		O6071510	O7062004	O7062805
623	568	626.562	4					126000	466000	184000		124000	133000	44400
		626.812						124000	523000	335000		199000	148000	55700
		627.062						120000	290000	164000		138000	94400	75400
		627.312						59736	144362	81639.2		68700	46992.3	37534.1
623	568	835.083	3	1.1	31.93			167000	1030000	380000		342000	252000	127000
		835.416						355000	1260000	180000		464000	216000	73300
		835.75						267000	846000	113000		284000	233000	124000
		836.083						163000	713000	71100		206000	83100	75900
623		766.843	2	-0.28	31.341			671000	1400000	917000		1310000	788000	289000
		767.343						484000	1460000	538000		1100000	506000	183000
		767.843						312000	600000	328000		664000	329000	95000
	568	573.327	2	-0.5	28.54			1440000	2330000	1430000		1150000	1250000	523000
		573.827						1300000	1470000	801000		717000	1160000	272000
		574.327						566000	491000	276000		227000	558000	137000
				XL sum				1381736	5272362	1.50874e+06		1825700	1.20649e+06	613234
				All sum				6154736	13023362	5.79874e+06		6993700	5.79749e+06	2.11223e+06
				%				22.45	40.4839	26.0184		26.1049	20.8106	29.0325
								29.6507	9.54992			25.316	4.16734
