# Supplementary material for: Phosphorylation-driven epichaperome assembly is a regulator of cellular adaptability and proliferation
Source: Nat Commun. 2024 Oct 16;15:8912. doi: 10.1038/s41467-024-53178-5 (PMC11484706; doi:10.1038/s41467-024-53178-5)
Supplement: Supplementary file 5 — Supplementary Data 3 [file 41467_2024_53178_MOESM5_ESM.xlsx]

## Sheet: PU Hsp90 band_Phospho
Search Name:	O5041002 PU Hsp90 band
						O5041002_ES PU_phosAcety
	Acc #	Modification	AA	Site	SLIP	Num Unique	% Cov	Best Disc Score	Best Expect Val	m/z	z	ppm	DB Peptide	Variable Mods	Fraction	RT	Score	Expect	# in DB	Protein MW	Species	Protein Name
[1]	P07901	Oxidation	M	98	-	86	77.8	7.68	7.9e-14	683.368	2	-0.2	TLTIVDTGIGMTK	Oxidation@11	O5041002_ES PU_ITMSms2cid	20.609	47.9	1.5e-10	2	84788.6	MOUSE	Heat shock protein HSP 90-alpha
[1]	P07901	Oxidation	M	119	-	86	77.8	7.68	7.9e-14	1106.2	3	2.7	AFMEALQAGADISMIGQFGVGFYSAYLVAEK	Oxidation@3;Oxidation@14	O5041002_ES PU_ITMSms2cid	35.649	33	3.8e-07	2	84788.6	MOUSE	Heat shock protein HSP 90-alpha
[1]	P07901	Oxidation	M	130	-	86	77.8	7.68	7.9e-14	1106.2	3	2.7	AFMEALQAGADISMIGQFGVGFYSAYLVAEK	Oxidation@3;Oxidation@14	O5041002_ES PU_ITMSms2cid	35.649	33	3.8e-07	2	84788.6	MOUSE	Heat shock protein HSP 90-alpha
[1]	P07901	Oxidation	M	180	-	86	77.8	7.68	7.9e-14	490.21	2	-1.6	TDTGEPMGR	Oxidation@7	O5041002_ES PU_ITMSms2cid	7.861	24.9	8.9e-07	1	84788.6	MOUSE	Heat shock protein HSP 90-alpha
[1]	P07901	Oxidation	M	372	-	86	77.8	7.68	7.9e-14	1216.09	2	2	VFIMDNCEELIPEYLNFIR	Oxidation@4	O5041002_ES PU_ITMSms2cid	36.492	35.9	8.1e-09	1	84788.6	MOUSE	Heat shock protein HSP 90-alpha
[1]	P07901	Oxidation	M	403	-	86	77.8	7.68	7.9e-14	440.216	2	1.7	EMLQQSK	Oxidation@2	O5041002_ES PU_ITMSms2cid	41.759	17.9	0.0002	2	84788.6	MOUSE	Heat shock protein HSP 90-alpha
[1]	P07901	Oxidation	M	475	-	86	77.8	7.68	7.9e-14	1131.49	2	0.62	YYTSASGDEMVSLKDYCTR	Oxidation@10	O5041002_ES PU_ITMSms2cid	17.432	37.1	2.7e-11	1	84788.6	MOUSE	Heat shock protein HSP 90-alpha
[1]	P07901	Oxidation	M	522	-	86	77.8	7.68	7.9e-14	1297.14	2	1.1	HGLEVIYMIEPIDEYCVQQLK	Oxidation@8	O5041002_ES PU_ITMSms2cid	28.517	46.8	2.9e-11	1	84788.6	MOUSE	Heat shock protein HSP 90-alpha
[1]	P07901	Oxidation	M	576	-	86	77.8	7.68	7.9e-14	503.286	2	-0.97	IMKDILEK	Oxidation@2	O5041002_ES PU_ITMSms2cid	10.927	25.5	0.00015	1	84788.6	MOUSE	Heat shock protein HSP 90-alpha
[1]	P07901	Oxidation	M	611	-	86	77.8	7.68	7.9e-14	1231.56	2	0.42	LVTSPCCIVTSTYGWTANMER	Oxidation@19	O5041002_ES PU_ITMSms2cid	25.467	38.7	2.3e-10	1	84788.6	MOUSE	Heat shock protein HSP 90-alpha
[1]	P07901	Oxidation	M	626	-	86	77.8	7.68	7.9e-14	610.75	2	0.27	DNSTMGYMAAK	Oxidation@5;Oxidation@8	O5041002_ES PU_ITMSms2cid	9.191	34	1.6e-07	1	84788.6	MOUSE	Heat shock protein HSP 90-alpha
[1]	P07901	Oxidation	M	629	-	86	77.8	7.68	7.9e-14	610.75	2	0.27	DNSTMGYMAAK	Oxidation@5;Oxidation@8	O5041002_ES PU_ITMSms2cid	9.191	34	1.6e-07	1	84788.6	MOUSE	Heat shock protein HSP 90-alpha
[1]	P07901	Oxidation	M	717	-	86	77.8	7.68	7.9e-14	1197.86	3	1.1	LGLGIDEDDPTVDDTSAAVTEEMPPLEGDDDTSR	Oxidation@23	O5041002_ES PU_ITMSms2cid	24.46	35.7	5.9e-09	1	84788.6	MOUSE	Heat shock protein HSP 90-alpha
[1]	P07901	Phospho	S	231	-	86	77.8	7.68	7.9e-14	737.285	2	-0.36	DKEVSDDEAEEK	Phospho@5	O5041002_ES PU_ITMSms2cid	8.102	31.2	3.7e-07	1	84788.6	MOUSE	Heat shock protein HSP 90-alpha
[1]	P07901	Phospho	S	263	35	86	77.8	7.68	7.9e-14	839.34	3	-0.91	ESDDKPEIEDVGSDEEEEEKK	Phospho@13=35	O5041002_ES PU_ITMSms2cid	13.469	27.9	1.6e-06	1	84788.6	MOUSE	Heat shock protein HSP 90-alpha
[1-1]	P11499	Oxidation	M	93	-	84	77.5	7.68	7.9e-14	683.368	2	-0.2	TLTLVDTGIGMTK	Oxidation@11	O5041002_ES PU_ITMSms2cid	20.609	47.9	1.5e-10	2	83281.9	MOUSE	Heat shock protein HSP 90-beta
[1-1]	P11499	Oxidation	M	114	-	84	77.5	7.68	7.9e-14	1106.2	3	2.7	AFMEALQAGADISMIGQFGVGFYSAYLVAEK	Oxidation@3;Oxidation@14	O5041002_ES PU_ITMSms2cid	35.649	33	3.8e-07	2	83281.9	MOUSE	Heat shock protein HSP 90-beta
[1-1]	P11499	Oxidation	M	125	-	84	77.5	7.68	7.9e-14	1106.2	3	2.7	AFMEALQAGADISMIGQFGVGFYSAYLVAEK	Oxidation@3;Oxidation@14	O5041002_ES PU_ITMSms2cid	35.649	33	3.8e-07	2	83281.9	MOUSE	Heat shock protein HSP 90-beta
[1-1]	P11499	Oxidation	M	363	-	84	77.5	7.68	7.9e-14	1195.57	2	-0.65	VFIMDSCDELIPEYLNFIR	Oxidation@4	O5041002_ES PU_ITMSms2cid	35.089	36.6	2.8e-08	1	83281.9	MOUSE	Heat shock protein HSP 90-beta
[1-1]	P11499	Oxidation	M	394	-	84	77.5	7.68	7.9e-14	440.216	2	1.7	EMLQQSK	Oxidation@2	O5041002_ES PU_ITMSms2cid	41.759	17.9	0.0002	2	83281.9	MOUSE	Heat shock protein HSP 90-beta
[1-1]	P11499	Oxidation	M	466	-	84	77.5	7.68	7.9e-14	1096.97	2	0.48	YHTSQSGDEMTSLSEYVSR	Oxidation@10	O5041002_ES PU_ITMSms2cid	17.504	50.6	3.8e-13	1	83281.9	MOUSE	Heat shock protein HSP 90-beta
[1-1]	P11499	Oxidation	M	513	-	84	77.5	7.68	7.9e-14	1232.57	2	-2.7	GFEVVYMTEPIDEYCVQQLK	Oxidation@7	O5041002_ES PU_ITMSms2cid	27.113	42.6	7.2e-11	1	83281.9	MOUSE	Heat shock protein HSP 90-beta
[1-1]	P11499	Oxidation	M	602	-	84	77.5	7.68	7.9e-14	1224.56	2	1.5	LVSSPCCIVTSTYGWTANMER	Oxidation@19	O5041002_ES PU_ITMSms2cid	25.342	41.9	1.1e-10	1	83281.9	MOUSE	Heat shock protein HSP 90-beta
[1-1]	P11499	Oxidation	M	617	9	84	77.5	7.68	7.9e-14	640.752	2	0.43	DNSTMGYMMAK	Oxidation@5=9;Oxidation@8|9	O5041002_ES PU_ITMSms2cid	11.328	30.5	5.5e-07	1	83281.9	MOUSE	Heat shock protein HSP 90-beta
[1-1]	P11499	Oxidation	M	620	27	84	77.5	7.68	7.9e-14	640.752	2	0.74	DNSTMGYMMAK	Oxidation@8=27;Oxidation@9=32	O5041002_ES PU_ITMSms2cid	10.293	37.3	8.7e-08	1	83281.9	MOUSE	Heat shock protein HSP 90-beta
[1-1]	P11499	Oxidation	M	621	32	84	77.5	7.68	7.9e-14	640.752	2	0.74	DNSTMGYMMAK	Oxidation@8=27;Oxidation@9=32	O5041002_ES PU_ITMSms2cid	10.293	37.3	8.7e-08	1	83281.9	MOUSE	Heat shock protein HSP 90-beta
[1-1]	P11499	Phospho	S	226	-	84	77.5	7.68	7.9e-14	815.823	2	1.5	EKEISDDEAEEEK	Phospho@5	O5041002_ES PU_ITMSms2cid	9.234	36.6	2.3e-08	1	83281.9	MOUSE	Heat shock protein HSP 90-beta
[1-1]	P11499	Phospho	S	255	55	84	77.5	7.68	7.9e-14	909.351	2	-0.18	IEDVGSDEEDDSGKDK	Phospho@6=55	O5041002_ES PU_ITMSms2cid	9.324	36.1	3.2e-10	1	83281.9	MOUSE	Heat shock protein HSP 90-beta
[2]	P70168	Oxidation	M	181	-	59	64.3	8.44	5.5e-14	731.39	2	0.37	SNEILTAIIQGMR	Oxidation@12	O5041002_ES PU_ITMSms2cid	27.973	39.3	2.3e-08	1	97185	MOUSE	Importin subunit beta-1
[2]	P70168	Oxidation	M	219	-	59	64.3	8.44	5.5e-14	1054.47	2	0.82	HFIMQVVCEATQCPDTR	Oxidation@4	O5041002_ES PU_ITMSms2cid	20.142	48.3	5.7e-11	1	97185	MOUSE	Importin subunit beta-1
[2]	P70168	Oxidation	M	291	-	59	64.3	8.44	5.5e-14	1205.55	4	2.7	SDIDEVALQGIEFWSNVCDEEMDLAIEASEAAEQGRPPEHTSK	Oxidation@22	O5041002_ES PU_ITMSms2cid	36.079	32.1	2.4e-06	1	97185	MOUSE	Importin subunit beta-1
[2]	P70168	Oxidation	M	353	-	59	64.3	8.44	5.5e-14	992.157	3	0.35	AAGVCLMLLSTCCEDDIVPHVLPFIK	Oxidation@7	O5041002_ES PU_ITMSms2cid	34.769	43.4	2e-10	1	97185	MOUSE	Importin subunit beta-1
[2]	P70168	Oxidation	M	388	67	59	64.3	8.44	5.5e-14	1138.11	4	2.8	DAAVMAFGSILEGPEPNQLKPLVIQAMPTLIELMKDPSVVVR	Oxidation@5=67;Oxidation@27|34	O5041002_ES PU_ITMSms2cid	35.931	34.3	4.8e-07	1	97185	MOUSE	Importin subunit beta-1
[2]	P70168	Oxidation	M	410	51	59	64.3	8.44	5.5e-14	1138.11	4	4.7	DAAVMAFGSILEGPEPNQLKPLVIQAMPTLIELMKDPSVVVR	Oxidation@27=51;Oxidation@34=58	O5041002_ES PU_ITMSms2cid	35.366	37.6	2.9e-07	1	97185	MOUSE	Importin subunit beta-1
[2]	P70168	Oxidation	M	417	58	59	64.3	8.44	5.5e-14	1138.11	4	4.7	DAAVMAFGSILEGPEPNQLKPLVIQAMPTLIELMKDPSVVVR	Oxidation@27=51;Oxidation@34=58	O5041002_ES PU_ITMSms2cid	35.366	37.6	2.9e-07	1	97185	MOUSE	Importin subunit beta-1
[2]	P70168	Oxidation	M	533	-	59	64.3	8.44	5.5e-14	686.837	2	0.63	SSAYESLMEIVK	Oxidation@8	O5041002_ES PU_ITMSms2cid	23.55	40.4	3.2e-07	1	97185	MOUSE	Importin subunit beta-1
[2]	P70168	Oxidation	M	555	-	59	64.3	8.44	5.5e-14	489.768	2	-0.94	TTLVIMER	Oxidation@6	O5041002_ES PU_ITMSms2cid	13.967	28.7	4.3e-06	1	97185	MOUSE	Importin subunit beta-1
[2]	P70168	Oxidation	M	564	-	59	64.3	8.44	5.5e-14	1008.5	2	0.72	LQQVLQMESHIQSTSDR	Oxidation@7	O5041002_ES PU_ITMSms2cid	14.683	46.6	7e-11	1	97185	MOUSE	Importin subunit beta-1
[2]	P70168	Oxidation	M	608	-	59	64.3	8.44	5.5e-14	756.41	3	-1.1	KVQHQDALQISDVVMASLLR	Oxidation@15	O5041002_ES PU_ITMSms2cid	27.338	40.1	1.2e-08	1	97185	MOUSE	Importin subunit beta-1
[2]	P70168	Oxidation	M	647	-	59	64.3	8.44	5.5e-14	815.439	2	0.0065	YMEAFKPFLGIGLK	Oxidation@2	O5041002_ES PU_ITMSms2cid	27.672	38.7	3.5e-10	1	97185	MOUSE	Importin subunit beta-1
[2]	P70168	Oxidation	M	693	-	59	64.3	8.44	5.5e-14	1094.88	3	0.36	ALQSNILPFCDEVMQLLLENLGNENVHR	Oxidation@14	O5041002_ES PU_ITMSms2cid	35.912	23.4	1.7e-05	1	97185	MOUSE	Importin subunit beta-1
[2]	P70168	Oxidation	M	754	-	59	64.3	8.44	5.5e-14	1254.28	3	-0.56	YLEVVLNTLQQASQAQVDKSDFDMVDYLNELR	Oxidation@24	O5041002_ES PU_ITMSms2cid	34.375	39	3.2e-09	1	97185	MOUSE	Importin subunit beta-1
[2]	P70168	Oxidation	M	788	-	59	64.3	8.44	5.5e-14	925.447	2	0.65	GDQENVHPDVMLVQPR	Oxidation@11	O5041002_ES PU_ITMSms2cid	16.914	37.9	2.4e-09	1	97185	MOUSE	Importin subunit beta-1
[2]	P70168	Oxidation	M	842	-	59	64.3	8.44	5.5e-14	627.34	3	-0.37	LVEARPMIHELLTEGR	Oxidation@7	O5041002_ES PU_ITMSms2cid	19.646	30.3	3.4e-07	1	97185	MOUSE	Importin subunit beta-1
[3]	Q01853	Gln->pyro-Glu	Q	568	-	65	70.6	7.69	3.4e-13	953.966	2	0.1	QAAPCVLFFDELDSIAK	Gln->pyro-Glu@1	O5041002_ES PU_ITMSms2cid	36.564	43.9	2e-09	1	89322.6	MOUSE	Transitional endoplasmic reticulum ATPase
[3]	Q01853	Met-loss+Acetyl	M	1	16	65	70.6	7.69	3.4e-13	845.928	2	0.082	MASGADSKGDDLSTAILK	Met-loss+Acetyl@1=16	O5041002_ES PU_ITMSms2cid	19.871	47.1	1.6e-07	1	89322.6	MOUSE	Transitional endoplasmic reticulum ATPase
[3]	Q01853	Oxidation	M	46	-	65	70.6	7.69	3.4e-13	534.263	2	-1	MDELQLFR	Oxidation@1	O5041002_ES PU_ITMSms2cid	21.802	33.2	1.1e-06	1	89322.6	MOUSE	Transitional endoplasmic reticulum ATPase
[3]	Q01853	Oxidation	M	219	-	65	70.6	7.69	3.4e-13	424.737	4	0.41	EMVELPLRHPALFK	Oxidation@2	O5041002_ES PU_ITMSms2cid	21.593	22.8	0.00023	1	89322.6	MOUSE	Transitional endoplasmic reticulum ATPase
[3]	Q01853	Oxidation	M	275	-	65	70.6	7.69	3.4e-13	1136.57	2	-1.9	AVANETGAFFFLINGPEIMSK	Oxidation@19	O5041002_ES PU_ITMSms2cid	34.427	43.1	5e-10	1	89322.6	MOUSE	Transitional endoplasmic reticulum ATPase
[3]	Q01853	Oxidation	M	332	-	65	70.6	7.69	3.4e-13	723.916	2	0.76	IVSQLLTLMDGLK	Oxidation@9	O5041002_ES PU_ITMSms2cid	26.649	41.2	4.5e-09	1	89322.6	MOUSE	Transitional endoplasmic reticulum ATPase
[3]	Q01853	Oxidation	M	344	-	65	70.6	7.69	3.4e-13	721.388	3	0.35	AHVIVMAATNRPNSIDPALR	Oxidation@6	O5041002_ES PU_ITMSms2cid	16.777	31.9	1.1e-07	1	89322.6	MOUSE	Transitional endoplasmic reticulum ATPase
[3]	Q01853	Oxidation	M	550	-	65	70.6	7.69	3.4e-13	976.466	2	1.6	GPELLTMWFGESEANVR	Oxidation@7	O5041002_ES PU_ITMSms2cid	32.734	47.2	3.1e-09	1	89322.6	MOUSE	Transitional endoplasmic reticulum ATPase
[3]	Q01853	Oxidation	M	608	-	65	70.6	7.69	3.4e-13	856.416	2	0.37	VINQILTEMDGMSTK	Oxidation@9;Oxidation@12	O5041002_ES PU_ITMSms2cid	17.182	42.4	3.1e-09	1	89322.6	MOUSE	Transitional endoplasmic reticulum ATPase
[3]	Q01853	Oxidation	M	611	-	65	70.6	7.69	3.4e-13	856.416	2	0.37	VINQILTEMDGMSTK	Oxidation@9;Oxidation@12	O5041002_ES PU_ITMSms2cid	17.182	42.4	3.1e-09	1	89322.6	MOUSE	Transitional endoplasmic reticulum ATPase
[3]	Q01853	Oxidation	M	678	-	65	70.6	7.69	3.4e-13	908.404	2	0.83	MTNGFSGADLTEICQR	Oxidation@1	O5041002_ES PU_ITMSms2cid	21.051	44.6	9.7e-11	1	89322.6	MOUSE	Transitional endoplasmic reticulum ATPase
[3]	Q01853	Oxidation	M	720	-	65	70.6	7.69	3.4e-13	1086.49	2	1.9	QTNPSAMEVEEDDPVPEIR	Oxidation@7	O5041002_ES PU_ITMSms2cid	20.017	38.8	1.3e-09	1	89322.6	MOUSE	Transitional endoplasmic reticulum ATPase
[3]	Q01853	Oxidation	M	740	-	65	70.6	7.69	3.4e-13	525.718	2	-1.1	DHFEEAMR	Oxidation@7	O5041002_ES PU_ITMSms2cid	8.9	27.6	1.4e-06	1	89322.6	MOUSE	Transitional endoplasmic reticulum ATPase
[3]	Q01853	Oxidation	M	757	-	65	70.6	7.69	3.4e-13	823.404	2	0.28	KYEMFAQTLQQSR	Oxidation@4	O5041002_ES PU_ITMSms2cid	16.305	38.4	1.5e-09	1	89322.6	MOUSE	Transitional endoplasmic reticulum ATPase
[4]	Q8BFY9	Acetyl	K	14	-	43	51.8	7.03	6e-12	1274.14	2	-0.33	MEYEWKPDEQGLQQILQLLK	Oxidation@1;Acetyl@6	O5041002_ES PU_ITMSms2cid	36.156	17.4	0.0002	1	102358	MOUSE	Transportin-1
[4]	Q8BFY9	Gln->pyro-Glu	Q	693	-	43	51.8	7.03	6e-12	631.835	2	-0.77	QSSFALLGDLTK	Gln->pyro-Glu@1	O5041002_ES PU_ITMSms2cid	31.774	36.8	1.8e-06	2	102358	MOUSE	Transportin-1
[4]	Q8BFY9	Oxidation	M	9	-	43	51.8	7.03	6e-12	1274.14	2	-0.33	MEYEWKPDEQGLQQILQLLK	Oxidation@1;Acetyl@6	O5041002_ES PU_ITMSms2cid	36.156	17.4	0.0002	1	102358	MOUSE	Transportin-1
[4]	Q8BFY9	Oxidation	M	183	-	43	51.8	7.03	6e-12	924.798	3	-0.094	ICEDSAEILDSDVLDRPLNIMIPK	Oxidation@21	O5041002_ES PU_ITMSms2cid	30.415	35.7	1.1e-07	1	102358	MOUSE	Transportin-1
[4]	Q8BFY9	Oxidation	M	249	-	43	51.8	7.03	6e-12	530.315	2	-0.33	ALVMLLEVR	Oxidation@4	O5041002_ES PU_ITMSms2cid	25.698	33.2	2.1e-06	2	102358	MOUSE	Transportin-1
[4]	Q8BFY9	Oxidation	M	262	-	43	51.8	7.03	6e-12	642.661	3	-1.6	LLPHMHNIVEYMLQR	Oxidation@5;Oxidation@12	O5041002_ES PU_ITMSms2cid	18.173	28.9	7.6e-06	1	102358	MOUSE	Transportin-1
[4]	Q8BFY9	Oxidation	M	269	-	43	51.8	7.03	6e-12	642.661	3	-1.6	LLPHMHNIVEYMLQR	Oxidation@5;Oxidation@12	O5041002_ES PU_ITMSms2cid	18.173	28.9	7.6e-06	1	102358	MOUSE	Transportin-1
[4]	Q8BFY9	Oxidation	M	316	-	43	51.8	7.03	6e-12	550.33	2	-1.3	LIPVLVNGMK	Oxidation@9	O5041002_ES PU_ITMSms2cid	20.233	30.3	8.8e-07	1	102358	MOUSE	Transportin-1
[4]	Q8BFY9	Oxidation	M	490	-	43	51.8	7.03	6e-12	687.114	4	0.049	YAHWVVSQPPDTYLKPLMTELLK	Oxidation@18	O5041002_ES PU_ITMSms2cid	29.284	30.7	0.00011	1	102358	MOUSE	Transportin-1
[4]	Q8BFY9	Oxidation	M	684	48	43	51.8	7.03	6e-12	880.905	2	0.76	SNILTLMYQCMQDK	Oxidation@11=48	O5041002_ES PU_ITMSms2cid	27.372	47.9	1.2e-09	1	102358	MOUSE	Transportin-1
[4]	Q8BFY9	Oxidation	M	688	29	43	51.8	7.03	6e-12	797.038	3	-1.3	SNILTLMYQCMQDKMPEVR	Oxidation@11=24;Oxidation@15=29	O5041002_ES PU_ITMSms2cid	26.848	30.4	3.5e-07	1	102358	MOUSE	Transportin-1
[4]	Q8BFY9	Oxidation	M	797	-	43	51.8	7.03	6e-12	1022.51	3	1.3	LGYVCPQEVAPMLQQFIRPWCTSLR	Oxidation@12	O5041002_ES PU_ITMSms2cid	34.295	28.5	9.7e-07	2	102358	MOUSE	Transportin-1
[4]	Q8BFY9	Oxidation	M	860	-	43	51.8	7.03	6e-12	608.259	2	-1.6	DDLRDMFCK	Oxidation@6	O5041002_ES PU_ITMSms2cid	14.771	17.5	0.00022	1	102358	MOUSE	Transportin-1
[4-1]	Q99LG2	Gln->pyro-Glu	Q	682	-	28	34.7	5.36	1.6e-09	631.835	2	-0.77	QSSFALLGDLTK	Gln->pyro-Glu@1	O5041002_ES PU_ITMSms2cid	31.774	36.8	1.8e-06	2	100457	MOUSE	Transportin-2
[4-1]	Q99LG2	Oxidation	M	239	-	28	34.7	5.36	1.6e-09	530.315	2	-0.33	ALVMLLEVR	Oxidation@4	O5041002_ES PU_ITMSms2cid	25.698	33.2	2.1e-06	2	100457	MOUSE	Transportin-2
[4-1]	Q99LG2	Oxidation	M	306	-	28	34.7	5.36	1.6e-09	697.406	3	-0.51	EVLASHLVQLIPILVNGMK	Oxidation@18	O5041002_ES PU_ITMSms2cid	35.482	30.8	1.1e-06	1	100457	MOUSE	Transportin-2
[4-1]	Q99LG2	Oxidation	M	786	-	28	34.7	5.36	1.6e-09	1022.51	3	1.3	LGYVCPQEVAPMLQQFIRPWCTSLR	Oxidation@12	O5041002_ES PU_ITMSms2cid	34.295	28.5	9.7e-07	2	100457	MOUSE	Transportin-2
[5]	Q9WUA3	Met-loss+Acetyl	M	1	-	30	43.4	7.97	3e-12	693.307	2	-0.7	MSDLDSSSSSAYPK	Met-loss+Acetyl@1	O5041002_ES PU_ITMSms2cid	13.99	27.2	8.5e-07	1	85455.8	MOUSE	ATP-dependent 6-phosphofructokinase, platelet type
[5]	Q9WUA3	Oxidation	M	38	-	30	43.4	7.97	3e-12	902.454	2	-0.14	AIGVLTSGGDAQGMNAAVR	Oxidation@14	O5041002_ES PU_ITMSms2cid	16.663	58.6	2.2e-11	1	85455.8	MOUSE	ATP-dependent 6-phosphofructokinase, platelet type
[5]	Q9WUA3	Oxidation	M	182	32	30	43.4	7.97	3e-12	1175.53	3	0.5	YSYLNVVGMVGSIDNDFCGTDMTIGTDSALHR	Oxidation@22=32	O5041002_ES PU_ITMSms2cid	33.998	37	5.8e-09	1	85455.8	MOUSE	ATP-dependent 6-phosphofructokinase, platelet type
[5]	Q9WUA3	Oxidation	M	201	-	30	43.4	7.97	3e-12	643.338	3	4.4	IIEVVDAIMTTAQSHQR	Oxidation@9	O5041002_ES PU_ITMSms2cid	22.967	18	0.00054	1	85455.8	MOUSE	ATP-dependent 6-phosphofructokinase, platelet type
[5]	Q9WUA3	Oxidation	M	216	-	30	43.4	7.97	3e-12	534.28	2	-1.8	TFVLEVMGR	Oxidation@7	O5041002_ES PU_ITMSms2cid	20.069	33.4	2.8e-07	1	85455.8	MOUSE	ATP-dependent 6-phosphofructokinase, platelet type
[5]	Q9WUA3	Oxidation	M	277	-	30	43.4	7.97	3e-12	810.436	3	-0.52	LNIIIVSEGAIDMQNKPITSEK	Oxidation@13	O5041002_ES PU_ITMSms2cid	26.11	34.8	3.8e-07	1	85455.8	MOUSE	ATP-dependent 6-phosphofructokinase, platelet type
[5]	Q9WUA3	Oxidation	M	442	-	30	43.4	7.97	3e-12	962.453	2	2	MFAIYDGFEGFANGQIK	Oxidation@1	O5041002_ES PU_ITMSms2cid	29.842	54.1	5.1e-12	1	85455.8	MOUSE	ATP-dependent 6-phosphofructokinase, platelet type
[5]	Q9WUA3	Oxidation	M	769	-	30	43.4	7.97	3e-12	646.784	4	-0.71	YEASYDMSDSGKLESLQHHEEL	Oxidation@7	O5041002_ES PU_ITMSms2cid	18.485	31.4	1.2e-06	1	85455.8	MOUSE	ATP-dependent 6-phosphofructokinase, platelet type
[6]	Q3U0V1	Oxidation	M	146	-	40	51.3	5.69	1.6e-10	752.699	3	-7.9	TSMTEEYRVPDGMVGLIIGR	Oxidation@3;Oxidation@13	O5041002_ES PU_ITMSms2cid	23.955	34	2.6e-07	1	76776.1	MOUSE	Far upstream element-binding protein 2
[6]	Q3U0V1	Oxidation	M	156	-	40	51.3	5.69	1.6e-10	752.699	3	-7.9	TSMTEEYRVPDGMVGLIIGR	Oxidation@3;Oxidation@13	O5041002_ES PU_ITMSms2cid	23.955	34	2.6e-07	1	76776.1	MOUSE	Far upstream element-binding protein 2
[6]	Q3U0V1	Oxidation	M	207	-	40	51.3	5.69	1.6e-10	556.258	2	-3	MMLDDIVSR	Oxidation@1;Oxidation@2	O5041002_ES PU_ITMSms2cid	15.869	30.5	1.4e-06	1	76776.1	MOUSE	Far upstream element-binding protein 2
[6]	Q3U0V1	Oxidation	M	208	-	40	51.3	5.69	1.6e-10	556.258	2	-3	MMLDDIVSR	Oxidation@1;Oxidation@2	O5041002_ES PU_ITMSms2cid	15.869	30.5	1.4e-06	1	76776.1	MOUSE	Far upstream element-binding protein 2
[6]	Q3U0V1	Oxidation	M	240	-	40	51.3	5.69	1.6e-10	936.446	3	2.2	GGPPGQFHDNANGGQNGTVQEIMIPAGK	Oxidation@23	O5041002_ES PU_ITMSms2cid	19.363	31.4	9.1e-07	1	76776.1	MOUSE	Far upstream element-binding protein 2
[6]	Q3U0V1	Oxidation	M	268	-	40	51.3	5.69	1.6e-10	686.693	3	-0.47	MILIQDGSQNTNVDKPLR	Oxidation@1	O5041002_ES PU_ITMSms2cid	16.996	18.9	0.001	1	76776.1	MOUSE	Far upstream element-binding protein 2
[6]	Q3U0V1	Oxidation	M	299	-	40	51.3	5.69	1.6e-10	812.877	2	-1.5	VQQACEMVMDILR	Oxidation@7;Oxidation@9	O5041002_ES PU_ITMSms2cid	20.435	44	3.2e-07	1	76776.1	MOUSE	Far upstream element-binding protein 2
[6]	Q3U0V1	Oxidation	M	301	-	40	51.3	5.69	1.6e-10	812.877	2	-1.5	VQQACEMVMDILR	Oxidation@7;Oxidation@9	O5041002_ES PU_ITMSms2cid	20.435	44	3.2e-07	1	76776.1	MOUSE	Far upstream element-binding protein 2
[6]	Q3U0V1	Oxidation	M	345	-	40	51.3	5.69	1.6e-10	404.716	2	1.2	SGEMIKK	Oxidation@4	O5041002_ES PU_ITMSms2cid	7.753	16.8	0.001	1	76776.1	MOUSE	Far upstream element-binding protein 2
[6]	Q3U0V1	Oxidation	M	374	-	40	51.3	5.69	1.6e-10	561.789	2	-1.2	IAHIMGPPDR	Oxidation@5	O5041002_ES PU_ITMSms2cid	11.136	30.2	5.5e-06	1	76776.1	MOUSE	Far upstream element-binding protein 2
[7]	Q62167	Oxidation	M	330	-	27	47.1	6.9	8.3e-12	463.21	2	1.7	LVDMMER	Oxidation@4;Oxidation@5	O5041002_ES PU_ITMSms2cid	8.692	19.6	0.001	1	73102	MOUSE	ATP-dependent RNA helicase DDX3X
[7]	Q62167	Oxidation	M	331	-	27	47.1	6.9	8.3e-12	463.21	2	1.7	LVDMMER	Oxidation@4;Oxidation@5	O5041002_ES PU_ITMSms2cid	8.692	19.6	0.001	1	73102	MOUSE	ATP-dependent RNA helicase DDX3X
[7]	Q62167	Oxidation	M	352	-	27	47.1	6.9	8.3e-12	684.818	2	0.066	MLDMGFEPQIR	Oxidation@1;Oxidation@4	O5041002_ES PU_ITMSms2cid	18.943	33.4	2.2e-07	3	73102	MOUSE	ATP-dependent RNA helicase DDX3X
[7]	Q62167	Oxidation	M	355	-	27	47.1	6.9	8.3e-12	684.818	2	0.066	MLDMGFEPQIR	Oxidation@1;Oxidation@4	O5041002_ES PU_ITMSms2cid	18.943	33.4	2.2e-07	3	73102	MOUSE	ATP-dependent RNA helicase DDX3X
[7]	Q62167	Oxidation	M	370	-	27	47.1	6.9	8.3e-12	587.294	2	-1.4	IVEQDTMPPK	Oxidation@7	O5041002_ES PU_ITMSms2cid	9.808	20.9	0.00029	1	73102	MOUSE	ATP-dependent RNA helicase DDX3X
[7]	Q62167	Oxidation	M	379	-	27	47.1	6.9	8.3e-12	665.3	2	-2.5	HTMMFSATFPK	Oxidation@3;Oxidation@4	O5041002_ES PU_ITMSms2cid	16.261	15.9	0.0011	1	73102	MOUSE	ATP-dependent RNA helicase DDX3X
[7]	Q62167	Oxidation	M	380	-	27	47.1	6.9	8.3e-12	665.3	2	-2.5	HTMMFSATFPK	Oxidation@3;Oxidation@4	O5041002_ES PU_ITMSms2cid	16.261	15.9	0.0011	1	73102	MOUSE	ATP-dependent RNA helicase DDX3X
[7]	Q62167	Oxidation	M	391	-	27	47.1	6.9	8.3e-12	438.734	2	0.64	EIQMLAR	Oxidation@4	O5041002_ES PU_ITMSms2cid	10.684	21.9	0.0011	1	73102	MOUSE	ATP-dependent RNA helicase DDX3X
[7-1]	Q61656	Oxidation	M	253	-	4	8.3	4.08	5.2e-08	684.818	2	0.066	MLDMGFEPQIR	Oxidation@1;Oxidation@4	O5041002_ES PU_ITMSms2cid	18.943	33.4	2.2e-07	3	69290.8	MOUSE	Probable ATP-dependent RNA helicase DDX5
[7-1]	Q61656	Oxidation	M	256	-	4	8.3	4.08	5.2e-08	684.818	2	0.066	MLDMGFEPQIR	Oxidation@1;Oxidation@4	O5041002_ES PU_ITMSms2cid	18.943	33.4	2.2e-07	3	69290.8	MOUSE	Probable ATP-dependent RNA helicase DDX5
[7-2]	Q501J6	Oxidation	M	251	-	2	3.5	4.08	5.2e-08	684.818	2	0.066	MLDMGFEPQIR	Oxidation@1;Oxidation@4	O5041002_ES PU_ITMSms2cid	18.943	33.4	2.2e-07	3	72400.1	MOUSE	Probable ATP-dependent RNA helicase DDX17
[7-2]	Q501J6	Oxidation	M	254	-	2	3.5	4.08	5.2e-08	684.818	2	0.066	MLDMGFEPQIR	Oxidation@1;Oxidation@4	O5041002_ES PU_ITMSms2cid	18.943	33.4	2.2e-07	3	72400.1	MOUSE	Probable ATP-dependent RNA helicase DDX17
[8]	P05213	Oxidation	M	302	-	19	57.6	6.55	3.1e-11	922.766	3	-0.77	AYHEQLSVAEITNACFEPANQMVK	Oxidation@22	O5041002_ES PU_ITMSms2cid	24.297	40.4	3.3e-08	3	50152.1	MOUSE	Tubulin alpha-1B chain
[8]	P05213	Oxidation	M	313	-	19	57.6	6.55	3.1e-11	633.278	2	0.46	YMACCLLYR	Oxidation@2	O5041002_ES PU_ITMSms2cid	19.028	30.6	4.3e-07	3	50152.1	MOUSE	Tubulin alpha-1B chain
[8]	P05213	Oxidation	M	377	-	19	57.6	6.55	3.1e-11	940.955	2	1.3	AVCMLSNTTAIAEAWAR	Oxidation@4	O5041002_ES PU_ITMSms2cid	25.844	53	2e-10	5	50152.1	MOUSE	Tubulin alpha-1B chain
[8]	P05213	Oxidation	M	398	-	19	57.6	6.55	3.1e-11	466.235	3	-2	LDHKFDLMYAK	Oxidation@8	O5041002_ES PU_ITMSms2cid	16.08	22.2	0.00019	5	50152.1	MOUSE	Tubulin alpha-1B chain
[8]	P05213	Oxidation	M	413	-	19	57.6	6.55	3.1e-11	782.676	3	0.24	AFVHWYVGEGMEEGEFSEAR	Oxidation@11	O5041002_ES PU_ITMSms2cid	23.829	46.1	2.3e-10	5	50152.1	MOUSE	Tubulin alpha-1B chain
[8-1]	P68369	Oxidation	M	302	-	19	57.6	6.55	3.1e-11	922.766	3	-0.77	AYHEQLSVAEITNACFEPANQMVK	Oxidation@22	O5041002_ES PU_ITMSms2cid	24.297	40.4	3.3e-08	3	50136.1	MOUSE	Tubulin alpha-1A chain
[8-1]	P68369	Oxidation	M	313	-	19	57.6	6.55	3.1e-11	633.278	2	0.46	YMACCLLYR	Oxidation@2	O5041002_ES PU_ITMSms2cid	19.028	30.6	4.3e-07	3	50136.1	MOUSE	Tubulin alpha-1A chain
[8-1]	P68369	Oxidation	M	377	-	19	57.6	6.55	3.1e-11	940.955	2	1.3	AVCMLSNTTAIAEAWAR	Oxidation@4	O5041002_ES PU_ITMSms2cid	25.844	53	2e-10	5	50136.1	MOUSE	Tubulin alpha-1A chain
[8-1]	P68369	Oxidation	M	398	-	19	57.6	6.55	3.1e-11	466.235	3	-2	LDHKFDLMYAK	Oxidation@8	O5041002_ES PU_ITMSms2cid	16.08	22.2	0.00019	5	50136.1	MOUSE	Tubulin alpha-1A chain
[8-1]	P68369	Oxidation	M	413	-	19	57.6	6.55	3.1e-11	782.676	3	0.24	AFVHWYVGEGMEEGEFSEAR	Oxidation@11	O5041002_ES PU_ITMSms2cid	23.829	46.1	2.3e-10	5	50136.1	MOUSE	Tubulin alpha-1A chain
[8-2]	P68373	Oxidation	M	313	-	18	52.6	6.55	3.1e-11	633.278	2	0.46	YMACCLLYR	Oxidation@2	O5041002_ES PU_ITMSms2cid	19.028	30.6	4.3e-07	3	49909.8	MOUSE	Tubulin alpha-1C chain
[8-2]	P68373	Oxidation	M	377	-	18	52.6	6.55	3.1e-11	940.955	2	1.3	AVCMLSNTTAIAEAWAR	Oxidation@4	O5041002_ES PU_ITMSms2cid	25.844	53	2e-10	5	49909.8	MOUSE	Tubulin alpha-1C chain
[8-2]	P68373	Oxidation	M	398	-	18	52.6	6.55	3.1e-11	466.235	3	-2	LDHKFDLMYAK	Oxidation@8	O5041002_ES PU_ITMSms2cid	16.08	22.2	0.00019	5	49909.8	MOUSE	Tubulin alpha-1C chain
[8-2]	P68373	Oxidation	M	413	-	18	52.6	6.55	3.1e-11	782.676	3	0.24	AFVHWYVGEGMEEGEFSEAR	Oxidation@11	O5041002_ES PU_ITMSms2cid	23.829	46.1	2.3e-10	5	49909.8	MOUSE	Tubulin alpha-1C chain
[8-3]	P05214	Oxidation	M	302	-	16	50.4	6.55	3.1e-11	922.766	3	-0.77	AYHEQLSVAEITNACFEPANQMVK	Oxidation@22	O5041002_ES PU_ITMSms2cid	24.297	40.4	3.3e-08	3	49960	MOUSE	Tubulin alpha-3 chain
[8-3]	P05214	Oxidation	M	377	-	16	50.4	6.55	3.1e-11	940.955	2	1.3	AVCMLSNTTAIAEAWAR	Oxidation@4	O5041002_ES PU_ITMSms2cid	25.844	53	2e-10	5	49960	MOUSE	Tubulin alpha-3 chain
[8-3]	P05214	Oxidation	M	398	-	16	50.4	6.55	3.1e-11	466.235	3	-2	LDHKFDLMYAK	Oxidation@8	O5041002_ES PU_ITMSms2cid	16.08	22.2	0.00019	5	49960	MOUSE	Tubulin alpha-3 chain
[8-3]	P05214	Oxidation	M	413	-	16	50.4	6.55	3.1e-11	782.676	3	0.24	AFVHWYVGEGMEEGEFSEAR	Oxidation@11	O5041002_ES PU_ITMSms2cid	23.829	46.1	2.3e-10	5	49960	MOUSE	Tubulin alpha-3 chain
[8-4]	Q9JJZ2	Oxidation	M	377	-	11	33.2	6.55	3.1e-11	940.955	2	1.3	AVCMLSNTTAIAEAWAR	Oxidation@4	O5041002_ES PU_ITMSms2cid	25.844	53	2e-10	5	50052	MOUSE	Tubulin alpha-8 chain
[8-4]	Q9JJZ2	Oxidation	M	398	-	11	33.2	6.55	3.1e-11	466.235	3	-2	LDHKFDLMYAK	Oxidation@8	O5041002_ES PU_ITMSms2cid	16.08	22.2	0.00019	5	50052	MOUSE	Tubulin alpha-8 chain
[8-4]	Q9JJZ2	Oxidation	M	413	-	11	33.2	6.55	3.1e-11	782.676	3	0.24	AFVHWYVGEGMEEGEFSEAR	Oxidation@11	O5041002_ES PU_ITMSms2cid	23.829	46.1	2.3e-10	5	50052	MOUSE	Tubulin alpha-8 chain
[9]	O54692	Met-loss+Acetyl	M	1	84	19	36.6	6.75	1.8e-11	796.739	3	-0.71	MASFVTEVLAHSGSLEKEDLGTR	Met-loss+Acetyl@1=84	O5041002_ES PU_ITMSms2cid	34.884	38.2	2.4e-09	1	88063.6	MOUSE	Centromere/kinetochore protein zw10 homolog
[9]	O54692	Oxidation	M	415	-	19	36.6	6.75	1.8e-11	468.238	3	0.61	NLMTSEIHNTVK	Oxidation@3	O5041002_ES PU_ITMSms2cid	11.736	15.9	0.00072	1	88063.6	MOUSE	Centromere/kinetochore protein zw10 homolog
[9]	O54692	Oxidation	M	613	-	19	36.6	6.75	1.8e-11	897.86	2	0.24	SFANMDDEENYSAASK	Oxidation@5	O5041002_ES PU_ITMSms2cid	12.897	42.3	1.8e-11	1	88063.6	MOUSE	Centromere/kinetochore protein zw10 homolog
[10]	P09405	Oxidation	M	627	-	21	29.4	5.69	3.4e-10	591.286	4	-0.23	EAMEDGEIDGNKVTLDWAKPK	Oxidation@3	O5041002_ES PU_ITMSms2cid	20.106	16.2	0.0038	1	76723.7	MOUSE	Nucleolin
[11]	Q8R146	Oxidation	M	670	-	20	42.1	5.22	1.9e-09	694.366	2	-0.038	TPVLLMLGQEDR	Oxidation@6	O5041002_ES PU_ITMSms2cid	22.677	42.6	3e-09	1	81581.6	MOUSE	Acylamino-acid-releasing enzyme
[11]	Q8R146	Oxidation	M	720	-	20	42.1	5.22	1.9e-09	786.375	4	-0.39	STHALSEVEVESDSFMNTVLWLHTHLGS	Oxidation@16	O5041002_ES PU_ITMSms2cid	34.267	40.6	5.8e-06	1	81581.6	MOUSE	Acylamino-acid-releasing enzyme
[12]	Q61881	Oxidation	M	131	-	18	33.5	5.88	4.4e-10	746.846	2	-0.12	NPQNQYPSELMR	Oxidation@11	O5041002_ES PU_ITMSms2cid	14.103	24.4	5.1e-06	1	81211.5	MOUSE	DNA replication licensing factor MCM7
[12]	Q61881	Oxidation	M	288	-	18	33.5	5.88	4.4e-10	889.447	3	-1.1	TGFQQMAQGLLSETYLEAHWIVK	Oxidation@6	O5041002_ES PU_ITMSms2cid	33.643	34.4	2.5e-08	1	81211.5	MOUSE	DNA replication licensing factor MCM7
[12]	Q61881	Oxidation	M	462	-	18	33.5	5.88	4.4e-10	605.648	3	-1.6	TAIHEVMEQQTISIAK	Oxidation@7	O5041002_ES PU_ITMSms2cid	16.196	32.5	1.8e-06	1	81211.5	MOUSE	DNA replication licensing factor MCM7
[12]	Q61881	Oxidation	M	588	-	18	33.5	5.88	4.4e-10	757.37	3	-2.4	QPTVPESLADYITAAYVEMR	Oxidation@19	O5041002_ES PU_ITMSms2cid	34.93	19.5	0.00015	1	81211.5	MOUSE	DNA replication licensing factor MCM7
[12]	Q61881	Oxidation	M	621	-	18	33.5	5.88	4.4e-10	592.634	3	1.6	MVDIVEKEDVNEAIR	Oxidation@1	O5041002_ES PU_ITMSms2cid	17.581	28.4	8.4e-06	1	81211.5	MOUSE	DNA replication licensing factor MCM7
[13]	Q9D662	Met-loss+Acetyl	M	1	-	14	29.2	6.26	2.5e-10	841.904	2	-0.19	MATYLEFIQQNEER	Met-loss+Acetyl@1	O5041002_ES PU_ITMSms2cid	31.295	40.1	3e-08	1	86437.9	MOUSE	Protein transport protein Sec23B
[13]	Q9D662	Oxidation	M	34	-	14	29.2	6.26	2.5e-10	735.924	2	-1.3	MVVPLACLLTPLK	Oxidation@1	O5041002_ES PU_ITMSms2cid	32.924	44.1	2.4e-09	1	86437.9	MOUSE	Protein transport protein Sec23B
[13]	Q9D662	Oxidation	M	172	-	14	29.2	6.26	2.5e-10	544.927	3	-4	MVQVHELSCEGISK	Oxidation@1	O5041002_ES PU_ITMSms2cid	14.79	24	3.6e-06	1	86437.9	MOUSE	Protein transport protein Sec23B
[13]	Q9D662	Oxidation	M	240	-	14	29.2	6.26	2.5e-10	823.924	2	-0.17	IDMNLTDLLGELQR	Oxidation@3	O5041002_ES PU_ITMSms2cid	32.323	38.2	1.3e-06	2	86437.9	MOUSE	Protein transport protein Sec23B
[13]	Q9D662	Oxidation	M	583	-	14	29.2	6.26	2.5e-10	668.66	3	-0.72	LSDSFSLYPQFMFHLR	Oxidation@12	O5041002_ES PU_ITMSms2cid	30.531	30.1	1.3e-06	1	86437.9	MOUSE	Protein transport protein Sec23B
[13]	Q9D662	Oxidation	M	755	-	14	29.2	6.26	2.5e-10	1014.5	4	1.9	VNPSQTHNNLYAWGQETGAPILTDDVSLQVFMDHLK	Oxidation@32	O5041002_ES PU_ITMSms2cid	32.592	33.9	4e-05	1	86437.9	MOUSE	Protein transport protein Sec23B
[13-1]	Q01405	Oxidation	M	34	-	4	7.2	6.26	2.5e-10	701.412	2	-0.93	MVVPVAALFTPLK	Oxidation@1	O5041002_ES PU_ITMSms2cid	31.861	34.2	3.8e-08	1	86162.6	MOUSE	Protein transport protein Sec23A
[13-1]	Q01405	Oxidation	M	238	-	4	7.2	6.26	2.5e-10	823.924	2	-0.17	IDMNLTDLLGELQR	Oxidation@3	O5041002_ES PU_ITMSms2cid	32.323	38.2	1.3e-06	2	86162.6	MOUSE	Protein transport protein Sec23A
[14]	Q8CHW4	Met-loss+Acetyl	M	1	-	12	22.5	5.97	1.4e-09	563.304	2	-0.15	MAATAAVPGAAAGR	Met-loss+Acetyl@1	O5041002_ES PU_ITMSms2cid	14.855	36.2	1.5e-08	1	80087.1	MOUSE	Translation initiation factor eIF-2B subunit epsilon
[14]	Q8CHW4	Oxidation	M	274	-	12	22.5	5.97	1.4e-09	573.304	4	-0.81	GILMNEEVLGNQIHLHVTTR	Oxidation@4	O5041002_ES PU_ITMSms2cid	24.308	30.2	3.2e-05	1	80087.1	MOUSE	Translation initiation factor eIF-2B subunit epsilon
[14]	Q8CHW4	Oxidation	M	514	-	12	22.5	5.97	1.4e-09	546.299	2	-1.7	QSLWGLMIK	Oxidation@7	O5041002_ES PU_ITMSms2cid	25.678	21.4	0.00011	1	80087.1	MOUSE	Translation initiation factor eIF-2B subunit epsilon
[14]	Q8CHW4	Phospho	S	540	-	12	22.5	5.97	1.4e-09	576.259	2	1.3	AGSPQLDDIR	Phospho@3	O5041002_ES PU_ITMSms2cid	15.76	24.1	9.3e-06	1	80087.1	MOUSE	Translation initiation factor eIF-2B subunit epsilon
[15]	P70698	Oxidation	M	126	-	10	18.3	7.09	1.9e-11	713.373	3	-0.86	TVQVVPHITDAIQEWVMR	Oxidation@17	O5041002_ES PU_ITMSms2cid	30.891	38.4	4.1e-09	1	66683	MOUSE	CTP synthase 1
[16]	P80318	Acetyl+Oxidation	M	1	-	15	31	4.91	7.9e-09	595.643	3	-0.58	MMGHRPVLVLSQNTK	Acetyl+Oxidation@1;Oxidation@2	O5041002_ES PU_ITMSms2cid	16.596	23.2	3.9e-06	1	60630.6	MOUSE	T-complex protein 1 subunit gamma
[16]	P80318	Oxidation	M	2	-	15	31	4.91	7.9e-09	595.643	3	-0.58	MMGHRPVLVLSQNTK	Acetyl+Oxidation@1;Oxidation@2	O5041002_ES PU_ITMSms2cid	16.596	23.2	3.9e-06	1	60630.6	MOUSE	T-complex protein 1 subunit gamma
[16]	P80318	Oxidation	M	80	-	15	31	4.91	7.9e-09	426.217	2	-2.6	SMIEISR	Oxidation@2	O5041002_ES PU_ITMSms2cid	11.3	21	0.00013	1	60630.6	MOUSE	T-complex protein 1 subunit gamma
[16]	P80318	Oxidation	M	305	-	15	31	4.91	7.9e-09	473.906	3	-0.82	GISDLAQHYLMR	Oxidation@11	O5041002_ES PU_ITMSms2cid	23.22	16.6	0.0013	1	60630.6	MOUSE	T-complex protein 1 subunit gamma
[16]	P80318	Oxidation	M	416	-	15	31	4.91	7.9e-09	878.458	3	0.12	NVLLDPQLVPGGGASEMAVAHALTEK	Oxidation@17	O5041002_ES PU_ITMSms2cid	29.065	19.2	0.00013	1	60630.6	MOUSE	T-complex protein 1 subunit gamma
[17]	P49718	Oxidation	M	240	-	14	28	4.91	3.7e-09	568.951	3	0.097	LQELPDAVPHGEMPR	Oxidation@13	O5041002_ES PU_ITMSms2cid	16.95	26.6	4.4e-06	1	82343.6	MOUSE	DNA replication licensing factor MCM5
[17]	P49718	Oxidation	M	670	-	14	28	4.91	3.7e-09	1153.89	3	0.0078	LFQVSTLDAALSGNLSGVEGFTTQEDQEMLSR	Oxidation@29	O5041002_ES PU_ITMSms2cid	33.689	35.3	2.8e-08	1	82343.6	MOUSE	DNA replication licensing factor MCM5
[18]	P11983	Oxidation	M	295	-	11	27.5	6.33	2.3e-11	1098.09	2	3.7	ILATGANVILTTGGIDDMYLK	Oxidation@18	O5041002_ES PU_ITMSms2cid	28.364	41.6	4.9e-10	1	60449.2	MOUSE	T-complex protein 1 subunit alpha
[18]	P11983	Oxidation	M	306	-	11	27.5	6.33	2.3e-11	615.302	2	-1.8	YFVEAGAMAVR	Oxidation@8	O5041002_ES PU_ITMSms2cid	16.483	31.3	1.4e-05	1	60449.2	MOUSE	T-complex protein 1 subunit alpha
[19]	Q8BJ71	Oxidation	M	753	-	13	23.3	4.96	6.5e-10	772.391	3	3.9	HNLSEVLLATMNILFTQFK	Phospho@4=12;Oxidation@11	O5041002_ES PU_ITMSms2cid	11.69	18.9	0.00089	1	93281.9	MOUSE	Nuclear pore complex protein Nup93
[19]	Q8BJ71	Phospho	S	746	12	13	23.3	4.96	6.5e-10	772.391	3	3.9	HNLSEVLLATMNILFTQFK	Phospho@4=12;Oxidation@11	O5041002_ES PU_ITMSms2cid	11.69	18.9	0.00089	1	93281.9	MOUSE	Nuclear pore complex protein Nup93
[20]	P42932	Met-loss+Acetyl	M	1	-	11	23.2	4.93	1.9e-09	353.716	2	-0.44	MALHVPK	Met-loss+Acetyl@1	O5041002_ES PU_ITMSms2cid	13.749	20.2	0.00056	1	59556	MOUSE	T-complex protein 1 subunit theta
[21]	B9EJR8	Oxidation	M	296	-	11	13	5.33	7e-10	982.508	2	2.2	LTPLLLSSFSDEMPEIR	Oxidation@13	O5041002_ES PU_ITMSms2cid	30.394	44.1	3.5e-09	1	93851.5	MOUSE	Dynein assembly factor 5, axonemal
[21]	B9EJR8	Oxidation	M	759	-	11	13	5.33	7e-10	646.357	2	-1.2	MAAASALLTWLK	Oxidation@1	O5041002_ES PU_ITMSms2cid	31.33	43.4	1.1e-07	1	93851.5	MOUSE	Dynein assembly factor 5, axonemal
[23]	P80317	Oxidation	M	46	-	11	22	5.13	3.7e-09	503.765	2	-1.4	MLVSGAGDIK	Oxidation@1	O5041002_ES PU_ITMSms2cid	12.349	21.6	0.00017	1	58004.8	MOUSE	T-complex protein 1 subunit zeta
[24]	Q8BWY9	Met-loss	M	1	-	12	13.7	5.44	8.3e-11	482.515	4	8.6	MDSTACLKSLLLSISQYK	Met-loss@1	O5041002_ES PU_ITMSms2cid	17.658	17.4	0.015	1	102044	MOUSE	Protein CIP2A
[26]	P46061	Oxidation	M	256	-	8	16.1	4.78	8.1e-09	496.758	2	0.62	GGVAMAETLK	Oxidation@5	O5041002_ES PU_ITMSms2cid	10.749	25.6	1.7e-06	1	63531.5	MOUSE	Ran GTPase-activating protein 1
[30]	P80316	Met-loss+Acetyl	M	1	-	5	15.5	5.56	1.2e-09	1070.08	2	0.49	MASVGTLAFDEYGRPFLIIK	Met-loss+Acetyl@1	O5041002_ES PU_ITMSms2cid	34.788	37.7	3.1e-08	1	59624.6	MOUSE	T-complex protein 1 subunit epsilon
[30]	P80316	Oxidation	M	29	-	5	15.5	5.56	1.2e-09	445.754	2	-1.2	LMGLEALK	Oxidation@2	O5041002_ES PU_ITMSms2cid	17.723	21.6	0.0002	1	59624.6	MOUSE	T-complex protein 1 subunit epsilon
[32]	P42227	Oxidation	M	660	-	5	11.7	5.2	1.1e-09	1018.2	3	-0.82	IMDATNILVSPLVYLYPDIPKEEAFGK	Oxidation@2	O5041002_ES PU_ITMSms2cid	35.318	35.2	2.4e-08	1	88054.6	MOUSE	Signal transducer and activator of transcription 3
[33]	P80313	Oxidation	M	394	-	7	16.5	3.96	3.5e-09	390.882	3	0.76	SLHDAIMIVR	Oxidation@7	O5041002_ES PU_ITMSms2cid	17.272	21.7	7.7e-05	1	59652.7	MOUSE	T-complex protein 1 subunit eta
[35]	P27641	Oxidation	M	84	-	6	8.5	3.29	4.3e-07	629.317	3	-0.78	HLMLPDFDLLEDIGNK	Oxidation@3	O5041002_ES PU_ITMSms2cid	32.642	36.3	4.3e-07	1	83057.7	MOUSE	X-ray repair cross-complementing protein 5
[38]	P50247	Oxidation	M	127	-	4	12.5	5	1.9e-10	756.711	3	0.22	DGPLNMILDDGGDLTNLIHTK	Oxidation@6	O5041002_ES PU_ITMSms2cid	33.281	20.3	9.7e-05	1	47688.6	MOUSE	Adenosylhomocysteinase
[40]	Q8VDM4	Acetyl	K	431	-	5	9.5	2.76	2.3e-06	1058.51	4	-10	DHGMLSAAASLGMILLWDVDGGLTQIDKYLYSSEDYIK	Acetyl@28	O5041002_ES PU_ITMSms2cid	29.192	16.2	0.011	1	100204	MOUSE	26S proteasome non-ATPase regulatory subunit 2
[42]	O09012	Oxidation	M	599	-	4	13.1	3.36	3.3e-08	812.373	2	-2.4	GEGGAMSENIWSTLR	Oxidation@6	O5041002_ES PU_ITMSms2cid	22.76	29.3	3.3e-08	1	70756.1	MOUSE	Peroxisomal targeting signal 1 receptor
[42]	O09012	Oxidation	M	634	-	4	13.1	3.36	3.3e-08	696.367	2	1.6	DLSALLAMFGLPQ	Oxidation@8	O5041002_ES PU_ITMSms2cid	36.772	28.2	3.8e-06	1	70756.1	MOUSE	Peroxisomal targeting signal 1 receptor
[45]	Q8BKC5	Oxidation	M	535	-	3	4.1	3.19	3.6e-07	818.41	2	-0.0035	FVPYYDLFMPSLK	Oxidation@9	O5041002_ES PU_ITMSms2cid	31.309	27.1	1.1e-06	1	123592	MOUSE	Importin-5
[52]	Q8BML9	Acetyl	K	673	-	3	5.4	3.08	2.5e-07	684.599	4	-7.9	ADAGEKPKAFIHWVSQPLVCEIR	Acetyl@6;Acetyl@8	O5041002_ES PU_ITMSms2cid	26.928	17.4	0.016	1	87677.3	MOUSE	Glutamine--tRNA ligase
[52]	Q8BML9	Acetyl	K	675	-	3	5.4	3.08	2.5e-07	684.599	4	-7.9	ADAGEKPKAFIHWVSQPLVCEIR	Acetyl@6;Acetyl@8	O5041002_ES PU_ITMSms2cid	26.928	17.4	0.016	1	87677.3	MOUSE	Glutamine--tRNA ligase
[54]	Q99LE6	Oxidation	M	211	-	3	6.5	2.21	1.4e-05	479.229	3	-1.2	LEELDADKAEMR	Oxidation@11	O5041002_ES PU_ITMSms2cid	11.797	20.9	6.5e-05	1	71782.4	MOUSE	ATP-binding cassette sub-family F member 2
[54]	Q99LE6	Oxidation	M	458	-	3	6.5	2.21	1.4e-05	772.92	2	-1.3	LLTGELLPTDGMIR	Oxidation@12	O5041002_ES PU_ITMSms2cid	24.966	21.2	0.00011	1	71782.4	MOUSE	ATP-binding cassette sub-family F member 2
[59]	P10126	Oxidation	M	276	-	3	9.5	2.1	1.4e-06	844.462	3	-2.5	VETGVLKPGMVVTFAPVNVTTEVK	Oxidation@10	O5041002_ES PU_ITMSms2cid	26.183	22.9	7.5e-06	1	50114.3	MOUSE	Elongation factor 1-alpha 1
[65]	O35286	Oxidation	M	273	-	1	1.5	4.4	1.1e-07	645.87	2	-0.8	TLATDILMGVLK	Oxidation@8	O5041002_ES PU_ITMSms2cid	33.077	45.1	1.1e-07	1	91007.7	MOUSE	Pre-mRNA-splicing factor ATP-dependent RNA helicase DHX15
[69]	Q9D4H8	Oxidation	M	406	-	1	2.6	3.81	5.7e-09	735.361	3	-4.2	GMTENEVEDKLTSFITVFK	Oxidation@2	O5041002_ES PU_ITMSms2cid	33.814	34.4	5.7e-09	1	86877.8	MOUSE	Cullin-2
[89]	Q7TQK0	Oxidation	M	431	18	1	2.8	1	0.0001	543.54	4	14	HHGPIPATPGMLPQKMSLDK	Oxidation@16=18	O5041002_ES PU_ITMSms2cid	19.573	22.4	0.0001	1	80252.3	MOUSE	Cyclin-T2

## Sheet: Lysate Hsp90 band_Phospho
Search Name:	O5072503 Lysate Hsp90 band
						O5072503_ES lysate mod search Misc 3
	Acc #	Modification	AA	Site	SLIP	Num Unique	% Cov	Best Disc Score	Best Expect Val	m/z	z	ppm	DB Peptide	Variable Mods	Fraction	RT	Score	Expect	# in DB	Protein MW	Species	Protein Name
[1]	P11499	Gln->pyro-Glu	Q	640	-	107	89.8	7.75	6.7e-14	565.275	2	-5.4	QKAEADKNDK	Gln->pyro-Glu@1	O5072503	8.055	35.6	2e-08	2	83281.9	MOUSE	Heat shock protein HSP 90-beta
[1]	P11499	Met-loss	M	1	-	107	89.8	7.75	6.7e-14	1017.49	4	-2.5	MPEEVHHGEEEVETFAFQAEIAQLMSLIINTFYSNK	Met-loss@1;Oxidation@25	O5072503	36.022	25.8	9.8e-05	1	83281.9	MOUSE	Heat shock protein HSP 90-beta
[1]	P11499	Oxidation	M	25	-	107	89.8	7.75	6.7e-14	1017.49	4	-2.5	MPEEVHHGEEEVETFAFQAEIAQLMSLIINTFYSNK	Met-loss@1;Oxidation@25	O5072503	36.022	25.8	9.8e-05	1	83281.9	MOUSE	Heat shock protein HSP 90-beta
[1]	P11499	Oxidation	M	93	-	107	89.8	7.75	6.7e-14	863.807	3	-4.2	TLTLVDTGIGMTKADLINNLGTIAK	Oxidation@11	O5072503	28.932	41.2	3.9e-10	2	83281.9	MOUSE	Heat shock protein HSP 90-beta
[1]	P11499	Oxidation	M	114	-	107	89.8	7.75	6.7e-14	1106.2	3	-5.3	AFMEALQAGADISMIGQFGVGFYSAYLVAEK	Oxidation@3;Oxidation@14	O5072503	35.088	20.6	6e-05	2	83281.9	MOUSE	Heat shock protein HSP 90-beta
[1]	P11499	Oxidation	M	125	-	107	89.8	7.75	6.7e-14	1106.2	3	-5.3	AFMEALQAGADISMIGQFGVGFYSAYLVAEK	Oxidation@3;Oxidation@14	O5072503	35.088	20.6	6e-05	2	83281.9	MOUSE	Heat shock protein HSP 90-beta
[1]	P11499	Oxidation	M	363	-	107	89.8	7.75	6.7e-14	1195.57	2	-5.8	VFIMDSCDELIPEYLNFIR	Oxidation@4	O5072503	33.973	34.5	2.6e-07	1	83281.9	MOUSE	Heat shock protein HSP 90-beta
[1]	P11499	Oxidation	M	394	-	107	89.8	7.75	6.7e-14	440.214	2	-4.9	EMLQQSK	Oxidation@2	O5072503	8.643	20.4	0.0004	2	83281.9	MOUSE	Heat shock protein HSP 90-beta
[1]	P11499	Oxidation	M	466	-	107	89.8	7.75	6.7e-14	1096.97	2	-3.9	YHTSQSGDEMTSLSEYVSR	Oxidation@10	O5072503	18.202	51.3	6.7e-14	1	83281.9	MOUSE	Heat shock protein HSP 90-beta
[1]	P11499	Oxidation	M	513	-	107	89.8	7.75	6.7e-14	1232.57	2	-5.5	GFEVVYMTEPIDEYCVQQLK	Oxidation@7	O5072503	26.848	49.5	7.2e-12	1	83281.9	MOUSE	Heat shock protein HSP 90-beta
[1]	P11499	Oxidation	M	553	-	107	89.8	7.75	6.7e-14	1147.04	2	-4.5	EGLELPEDEEEKKKMEESK	Oxidation@15	O5072503	14.584	23.3	6.7e-06	1	83281.9	MOUSE	Heat shock protein HSP 90-beta
[1]	P11499	Oxidation	M	602	-	107	89.8	7.75	6.7e-14	1224.55	2	-5.5	LVSSPCCIVTSTYGWTANMER	Oxidation@19	O5072503	25.548	40.1	1.2e-10	1	83281.9	MOUSE	Heat shock protein HSP 90-beta
[1]	P11499	Oxidation	M	617	25	107	89.8	7.75	6.7e-14	640.748	2	-5	DNSTMGYMMAK	Oxidation@5=25;Oxidation@8|9	O5072503	13.1	33.9	3.6e-08	1	83281.9	MOUSE	Heat shock protein HSP 90-beta
[1]	P11499	Oxidation	M	620	23	107	89.8	7.75	6.7e-14	640.749	2	-3.5	DNSTMGYMMAK	Oxidation@8=23;Oxidation@9=29	O5072503	12.599	32.6	6.3e-07	1	83281.9	MOUSE	Heat shock protein HSP 90-beta
[1]	P11499	Oxidation	M	621	29	107	89.8	7.75	6.7e-14	640.749	2	-3.5	DNSTMGYMMAK	Oxidation@8=23;Oxidation@9=29	O5072503	12.599	32.6	6.3e-07	1	83281.9	MOUSE	Heat shock protein HSP 90-beta
[1]	P11499	Phospho	S	226	-	107	89.8	7.75	6.7e-14	815.818	2	-5.3	EKEISDDEAEEEK	Phospho@5	O5072503	11.374	36.4	2e-08	1	83281.9	MOUSE	Heat shock protein HSP 90-beta
[1]	P11499	Phospho	S	255	48	107	89.8	7.75	6.7e-14	909.348	2	-3.7	IEDVGSDEEDDSGKDK	Phospho@6=48	O5072503	11.711	33.6	1.3e-08	1	83281.9	MOUSE	Heat shock protein HSP 90-beta
[1-1]	P07901	Gln->pyro-Glu	Q	649	-	105	86.5	6.63	9.4e-12	565.275	2	-5.4	QKAEADKNDK	Gln->pyro-Glu@1	O5072503	8.055	35.6	2e-08	2	84788.6	MOUSE	Heat shock protein HSP 90-alpha
[1-1]	P07901	Oxidation	M	98	-	105	86.5	6.63	9.4e-12	863.807	3	-4.2	TLTIVDTGIGMTKADLINNLGTIAK	Oxidation@11	O5072503	28.932	41.2	3.9e-10	2	84788.6	MOUSE	Heat shock protein HSP 90-alpha
[1-1]	P07901	Oxidation	M	119	-	105	86.5	6.63	9.4e-12	1106.2	3	-5.3	AFMEALQAGADISMIGQFGVGFYSAYLVAEK	Oxidation@3;Oxidation@14	O5072503	35.088	20.6	6e-05	2	84788.6	MOUSE	Heat shock protein HSP 90-alpha
[1-1]	P07901	Oxidation	M	130	-	105	86.5	6.63	9.4e-12	1106.2	3	-5.3	AFMEALQAGADISMIGQFGVGFYSAYLVAEK	Oxidation@3;Oxidation@14	O5072503	35.088	20.6	6e-05	2	84788.6	MOUSE	Heat shock protein HSP 90-alpha
[1-1]	P07901	Oxidation	M	180	-	105	86.5	6.63	9.4e-12	490.208	2	-6.5	TDTGEPMGR	Oxidation@7	O5072503	8.516	30	2.5e-07	1	84788.6	MOUSE	Heat shock protein HSP 90-alpha
[1-1]	P07901	Oxidation	M	372	-	105	86.5	6.63	9.4e-12	1216.08	2	-6	VFIMDNCEELIPEYLNFIR	Oxidation@4	O5072503	33.827	39.8	8.6e-10	1	84788.6	MOUSE	Heat shock protein HSP 90-alpha
[1-1]	P07901	Oxidation	M	403	-	105	86.5	6.63	9.4e-12	440.214	2	-4.9	EMLQQSK	Oxidation@2	O5072503	8.643	20.4	0.0004	2	84788.6	MOUSE	Heat shock protein HSP 90-alpha
[1-1]	P07901	Oxidation	M	475	-	105	86.5	6.63	9.4e-12	1131.48	2	-4.1	YYTSASGDEMVSLKDYCTR	Oxidation@10	O5072503	18.517	35.3	1.1e-10	1	84788.6	MOUSE	Heat shock protein HSP 90-alpha
[1-1]	P07901	Oxidation	M	522	-	105	86.5	6.63	9.4e-12	1297.13	2	-4.5	HGLEVIYMIEPIDEYCVQQLK	Oxidation@8	O5072503	27.869	46.1	3.2e-10	1	84788.6	MOUSE	Heat shock protein HSP 90-alpha
[1-1]	P07901	Oxidation	M	576	-	105	86.5	6.63	9.4e-12	503.283	2	-5.3	IMKDILEK	Oxidation@2	O5072503	13.586	24.4	0.00054	1	84788.6	MOUSE	Heat shock protein HSP 90-alpha
[1-1]	P07901	Oxidation	M	611	-	105	86.5	6.63	9.4e-12	1231.56	2	-4.1	LVTSPCCIVTSTYGWTANMER	Oxidation@19	O5072503	26.241	39.2	3.7e-10	1	84788.6	MOUSE	Heat shock protein HSP 90-alpha
[1-1]	P07901	Oxidation	M	626	-	105	86.5	6.63	9.4e-12	610.746	2	-5.5	DNSTMGYMAAK	Oxidation@5;Oxidation@8	O5072503	10.262	33.6	6.9e-07	1	84788.6	MOUSE	Heat shock protein HSP 90-alpha
[1-1]	P07901	Oxidation	M	629	-	105	86.5	6.63	9.4e-12	610.746	2	-5.5	DNSTMGYMAAK	Oxidation@5;Oxidation@8	O5072503	10.262	33.6	6.9e-07	1	84788.6	MOUSE	Heat shock protein HSP 90-alpha
[1-1]	P07901	Oxidation	M	717	-	105	86.5	6.63	9.4e-12	1796.28	2	-3.7	LGLGIDEDDPTVDDTSAAVTEEMPPLEGDDDTSR	Oxidation@23	O5072503	25.465	37.9	2.4e-11	1	84788.6	MOUSE	Heat shock protein HSP 90-alpha
[1-1]	P07901	Phospho	S	231	-	105	86.5	6.63	9.4e-12	620.582	3	-6.4	DKEVSDDEAEEKEEK	Phospho@5	O5072503	9.786	27.3	1.1e-06	1	84788.6	MOUSE	Heat shock protein HSP 90-alpha
[1-1]	P07901	Phospho	S	263	54	105	86.5	6.63	9.4e-12	796.639	3	-4.8	ESDDKPEIEDVGSDEEEEEK	Phospho@13=54	O5072503	16.405	38.7	3.4e-10	1	84788.6	MOUSE	Heat shock protein HSP 90-alpha
[1-2]	Q58FG1	Acetyl	K	289	-	8	18.2	5.82	1.3e-10	1212.03	2	-10	NQSLRTSAKSTYGWTANMER	Acetyl@9;Phospho@3|6|7	O5072503	31.703	21.8	1.8e-06	1	47712.3	HUMAN	Putative heat shock protein HSP 90-alpha A4
[1-2]	Q58FG1	Oxidation	M	38	-	8	18.2	5.82	1.3e-10	683.365	2	-5	TLTIVDTGIGMTK	Oxidation@11	O5072503	22.687	48.3	4.6e-10	3	47712.3	HUMAN	Putative heat shock protein HSP 90-alpha A4
[1-2]	Q58FG1	Oxidation	M	175	-	8	18.2	5.82	1.3e-10	1207.08	2	2	DLIMDNCEELIPEYLNFIR	Oxidation@4	O5072503	34.899	25.6	1.4e-06	1	47712.3	HUMAN	Putative heat shock protein HSP 90-alpha A4
[2]	P49718	Gln->pyro-Glu	Q	91	-	70	73.6	6.41	3.3e-11	780.403	2	-4.5	QPAEHLQLLEEAAK	Gln->pyro-Glu@1	O5072503	24.846	33.7	5.1e-06	1	82407.5	MOUSE	DNA replication licensing factor MCM5
[2]	P49718	Gln->pyro-Glu	Q	701	-	70	73.6	6.41	3.3e-11	375.531	3	-5.6	QKYPEHAIR	Gln->pyro-Glu@1	O5072503	12.865	20.3	5.2e-05	1	82407.5	MOUSE	DNA replication licensing factor MCM5
[2]	P49718	Met-loss+Acetyl	M	1	-	70	73.6	6.41	3.3e-11	907.38	3	-4.8	MSGFDDPGIFYSDSFGGDPGAEEGQAR	Met-loss+Acetyl@1	O5072503	29.99	16.4	3.5e-05	1	82407.5	MOUSE	DNA replication licensing factor MCM5
[2]	P49718	Oxidation	M	127	-	70	73.6	6.41	3.3e-11	710.367	4	-6.6	EVADEVTRPRPAGDELLQDIQVMLK	Oxidation@23	O5072503	26.73	28.1	0.00047	1	82407.5	MOUSE	DNA replication licensing factor MCM5
[2]	P49718	Oxidation	M	144	-	70	73.6	6.41	3.3e-11	540.243	2	-6	SDMMSHLVK	Oxidation@3;Oxidation@4	O5072503	9.692	27.6	1.6e-06	1	82407.5	MOUSE	DNA replication licensing factor MCM5
[2]	P49718	Oxidation	M	145	-	70	73.6	6.41	3.3e-11	540.243	2	-6	SDMMSHLVK	Oxidation@3;Oxidation@4	O5072503	9.692	27.6	1.6e-06	1	82407.5	MOUSE	DNA replication licensing factor MCM5
[2]	P49718	Oxidation	M	184	-	70	73.6	6.41	3.3e-11	622.558	4	-5.4	SCHNTLTNIAMRPGLEGYALPR	Oxidation@11	O5072503	21.8	43.5	7.4e-08	1	82407.5	MOUSE	DNA replication licensing factor MCM5
[2]	P49718	Oxidation	M	241	-	70	73.6	6.41	3.3e-11	852.919	2	-3.6	LQELPDAVPHGEMPR	Oxidation@13	O5072503	18.02	43.8	3e-09	1	82407.5	MOUSE	DNA replication licensing factor MCM5
[2]	P49718	Oxidation	M	245	-	70	73.6	6.41	3.3e-11	569.739	2	-5	HMQLYCDR	Oxidation@2	O5072503	11.145	24.1	6.8e-06	1	82407.5	MOUSE	DNA replication licensing factor MCM5
[2]	P49718	Oxidation	M	266	-	70	73.6	6.41	3.3e-11	570.817	2	-5.6	VTIMGIYSIK	Oxidation@4	O5072503	22.951	36.1	1.1e-06	1	82407.5	MOUSE	DNA replication licensing factor MCM5
[2]	P49718	Oxidation	M	347	-	70	73.6	6.41	3.3e-11	701.319	2	-5.1	SISPSIFGGMDMK	Oxidation@10;Oxidation@12	O5072503	21.484	34.3	8.8e-08	1	82407.5	MOUSE	DNA replication licensing factor MCM5
[2]	P49718	Oxidation	M	349	-	70	73.6	6.41	3.3e-11	701.319	2	-5.1	SISPSIFGGMDMK	Oxidation@10;Oxidation@12	O5072503	21.484	34.3	8.8e-08	1	82407.5	MOUSE	DNA replication licensing factor MCM5
[2]	P49718	Oxidation	M	379	-	70	73.6	6.41	3.3e-11	843.942	2	-4.7	RGDINLLMLGDPGTAK	Oxidation@8	O5072503	23.349	33.5	9.1e-08	1	82407.5	MOUSE	DNA replication licensing factor MCM5
[2]	P49718	Oxidation	M	462	-	70	73.6	6.41	3.3e-11	892.961	2	-4	VAIHEAMEQQTISIAK	Oxidation@7	O5072503	17.016	35.9	2.1e-08	1	82407.5	MOUSE	DNA replication licensing factor MCM5
[2]	P49718	Oxidation	M	507	-	70	73.6	6.41	3.3e-11	812.384	2	-5.2	GEDNIDFMPTILSR	Oxidation@8	O5072503	24.915	40.2	8.1e-07	1	82407.5	MOUSE	DNA replication licensing factor MCM5
[2]	P49718	Oxidation	M	531	13	70	73.6	6.41	3.3e-11	362.67	2	-5.4	DMMLAK	Oxidation@3=13	O5072503	13.279	18.4	0.00047	1	82407.5	MOUSE	DNA replication licensing factor MCM5
[2]	P49718	Oxidation	M	537	-	70	73.6	6.41	3.3e-11	869.783	3	-3.5	HVMTLHVSALTQTQAVEGEIDLAK	Oxidation@3	O5072503	23.302	38.4	5.1e-08	1	82407.5	MOUSE	DNA replication licensing factor MCM5
[2]	P49718	Oxidation	M	589	-	70	73.6	6.41	3.3e-11	356.195	2	-4.3	YIIMR	Oxidation@4	O5072503	14.394	17.3	0.0039	1	82407.5	MOUSE	DNA replication licensing factor MCM5
[2]	P49718	Oxidation	M	626	-	70	73.6	6.41	3.3e-11	655.328	3	-5.2	MKLQPFATEADVEEALR	Oxidation@1	O5072503	24.767	41.7	1.5e-08	1	82407.5	MOUSE	DNA replication licensing factor MCM5
[2]	P49718	Oxidation	M	671	-	70	73.6	6.41	3.3e-11	1153.89	3	-4.8	LFQVSTLDAALSGNLSGVEGFTTQEDQEMLSR	Oxidation@29	O5072503	32.372	23.9	6e-06	1	82407.5	MOUSE	DNA replication licensing factor MCM5
[2]	P49718	Oxidation	M	715	-	70	73.6	6.41	3.3e-11	444.768	2	-4.5	VLQLMLR	Oxidation@5	O5072503	21.727	29	7.1e-05	1	82407.5	MOUSE	DNA replication licensing factor MCM5
[3]	Q61881	Met-loss+Acetyl	M	1	8	52	68.6	6.83	1.4e-11	546.797	2	-5.7	MALKDYAIEK	Met-loss+Acetyl@1=8	O5072503	19.861	29.1	3.7e-05	1	81211.5	MOUSE	DNA replication licensing factor MCM7
[3]	Q61881	Oxidation	M	108	-	52	68.6	6.83	1.4e-11	420.189	2	-5.6	LMMEQR	Oxidation@2;Oxidation@3	O5072503	8.567	21.9	8.8e-05	1	81211.5	MOUSE	DNA replication licensing factor MCM7
[3]	Q61881	Oxidation	M	109	-	52	68.6	6.83	1.4e-11	420.189	2	-5.6	LMMEQR	Oxidation@2;Oxidation@3	O5072503	8.567	21.9	8.8e-05	1	81211.5	MOUSE	DNA replication licensing factor MCM7
[3]	Q61881	Oxidation	M	131	-	52	68.6	6.83	1.4e-11	746.842	2	-4.8	NPQNQYPSELMR	Oxidation@11	O5072503	15.855	30	7.2e-08	1	81211.5	MOUSE	DNA replication licensing factor MCM7
[3]	Q61881	Oxidation	M	288	-	52	68.6	6.83	1.4e-11	889.442	3	-5.9	TGFQQMAQGLLSETYLEAHWIVK	Oxidation@6	O5072503	31.6	31.3	4.8e-08	1	81211.5	MOUSE	DNA replication licensing factor MCM7
[3]	Q61881	Oxidation	M	369	-	52	68.6	6.83	1.4e-11	928.017	2	-4.9	ALLLLLVGGVDQSPQGMK	Oxidation@17	O5072503	31.655	50.7	9.6e-11	1	81211.5	MOUSE	DNA replication licensing factor MCM7
[3]	Q61881	Oxidation	M	462	-	52	68.6	6.83	1.4e-11	907.966	2	-3.7	TAIHEVMEQQTISIAK	Oxidation@7	O5072503	17.529	39.4	3.9e-09	1	81211.5	MOUSE	DNA replication licensing factor MCM7
[3]	Q61881	Oxidation	M	565	-	52	68.6	6.83	1.4e-11	548.236	2	-6.7	YIAMCHER	Oxidation@4	O5072503	9.519	29.1	2.1e-06	1	81211.5	MOUSE	DNA replication licensing factor MCM7
[3]	Q61881	Oxidation	M	588	-	52	68.6	6.83	1.4e-11	1135.55	2	-4.7	QPTVPESLADYITAAYVEMR	Oxidation@19	O5072503	32.683	37.9	4.2e-10	1	81211.5	MOUSE	DNA replication licensing factor MCM7
[3]	Q61881	Oxidation	M	621	-	52	68.6	6.83	1.4e-11	592.63	3	-5.7	MVDIVEKEDVNEAIR	Oxidation@1	O5072503	18.654	29.8	1.4e-06	1	81211.5	MOUSE	DNA replication licensing factor MCM7
[4]	P70168	Oxidation	M	181	-	43	56.6	7.75	2.7e-12	731.386	2	-5.4	SNEILTAIIQGMR	Oxidation@12	O5072503	27.55	42.5	5.2e-08	1	97185	MOUSE	Importin subunit beta-1
[4]	P70168	Oxidation	M	353	-	43	56.6	7.75	2.7e-12	992.151	3	-5.7	AAGVCLMLLSTCCEDDIVPHVLPFIK	Oxidation@7	O5072503	32.809	29.7	1.1e-07	1	97185	MOUSE	Importin subunit beta-1
[4]	P70168	Oxidation	M	533	-	43	56.6	7.75	2.7e-12	686.832	2	-6.5	SSAYESLMEIVK	Oxidation@8	O5072503	24.267	39.6	1.6e-07	1	97185	MOUSE	Importin subunit beta-1
[4]	P70168	Oxidation	M	555	-	43	56.6	7.75	2.7e-12	489.766	2	-3.8	TTLVIMER	Oxidation@6	O5072503	16.953	32.8	2.5e-06	1	97185	MOUSE	Importin subunit beta-1
[4]	P70168	Oxidation	M	564	-	43	56.6	7.75	2.7e-12	1008.49	2	-3.6	LQQVLQMESHIQSTSDR	Oxidation@7	O5072503	16.293	48.2	4.5e-11	1	97185	MOUSE	Importin subunit beta-1
[4]	P70168	Oxidation	M	647	-	43	56.6	7.75	2.7e-12	815.435	2	-4.5	YMEAFKPFLGIGLK	Oxidation@2	O5072503	27.38	38.6	1.7e-10	1	97185	MOUSE	Importin subunit beta-1
[4]	P70168	Oxidation	M	754	-	43	56.6	7.75	2.7e-12	816.86	2	-5.4	SDFDMVDYLNELR	Oxidation@5	O5072503	26.366	44.7	2e-08	1	97185	MOUSE	Importin subunit beta-1
[4]	P70168	Oxidation	M	788	-	43	56.6	7.75	2.7e-12	925.442	2	-5	GDQENVHPDVMLVQPR	Oxidation@11	O5072503	18.16	35.1	1e-07	1	97185	MOUSE	Importin subunit beta-1
[4]	P70168	Oxidation	M	842	-	43	56.6	7.75	2.7e-12	627.337	3	-4.8	LVEARPMIHELLTEGR	Oxidation@7	O5072503	20.13	28.5	2.4e-06	1	97185	MOUSE	Importin subunit beta-1
[5]	O35286	Oxidation	M	68	-	49	50.8	5.75	2.7e-10	800.44	2	-3.2	ASTNAMLISAGLPPLK	Oxidation@6	O5072503	24.6	37.2	3.4e-08	1	91007.7	MOUSE	Pre-mRNA-splicing factor ATP-dependent RNA helicase DHX15
[5]	O35286	Oxidation	M	178	-	49	50.8	5.75	2.7e-10	864.394	2	-4.6	TTQIPQWCVEYMR	Oxidation@12	O5072503	22.979	37.2	1.3e-07	1	91007.7	MOUSE	Pre-mRNA-splicing factor ATP-dependent RNA helicase DHX15
[5]	O35286	Oxidation	M	199	-	49	50.8	5.75	2.7e-10	474.747	2	-5.9	VAAMSVAQR	Oxidation@4	O5072503	10.158	32.5	1.3e-05	1	91007.7	MOUSE	Pre-mRNA-splicing factor ATP-dependent RNA helicase DHX15
[5]	O35286	Oxidation	M	209	32	49	50.8	5.75	2.7e-10	1014.47	2	-4.4	VADEMDVMLGQEVGYSIR	Oxidation@5=32	O5072503	24.78	44.9	4.5e-10	1	91007.7	MOUSE	Pre-mRNA-splicing factor ATP-dependent RNA helicase DHX15
[5]	O35286	Oxidation	M	236	-	49	50.8	5.75	2.7e-10	566.259	2	-5.6	YMTDGMLLR	Oxidation@2;Oxidation@6	O5072503	17.332	25.5	2.2e-05	1	91007.7	MOUSE	Pre-mRNA-splicing factor ATP-dependent RNA helicase DHX15
[5]	O35286	Oxidation	M	240	-	49	50.8	5.75	2.7e-10	566.259	2	-5.6	YMTDGMLLR	Oxidation@2;Oxidation@6	O5072503	17.332	25.5	2.2e-05	1	91007.7	MOUSE	Pre-mRNA-splicing factor ATP-dependent RNA helicase DHX15
[5]	O35286	Oxidation	M	246	-	49	50.8	5.75	2.7e-10	602.284	2	-5.4	EAMNDPLLER	Oxidation@3	O5072503	17.592	27.1	7.8e-06	1	91007.7	MOUSE	Pre-mRNA-splicing factor ATP-dependent RNA helicase DHX15
[5]	O35286	Oxidation	M	273	-	49	50.8	5.75	2.7e-10	645.866	2	-6.2	TLATDILMGVLK	Oxidation@8	O5072503	32.225	48.1	8.9e-08	1	91007.7	MOUSE	Pre-mRNA-splicing factor ATP-dependent RNA helicase DHX15
[5]	O35286	Oxidation	M	291	-	49	50.8	5.75	2.7e-10	610.828	2	-5.2	VIVMSATLDAGK	Oxidation@4	O5072503	16.927	37.7	1.1e-07	1	91007.7	MOUSE	Pre-mRNA-splicing factor ATP-dependent RNA helicase DHX15
[5]	O35286	Oxidation	M	494	-	49	50.8	5.75	2.7e-10	813.374	2	-4.2	TEMQDNTYPEILR	Oxidation@3	O5072503	20.973	41.6	3.7e-08	1	91007.7	MOUSE	Pre-mRNA-splicing factor ATP-dependent RNA helicase DHX15
[5]	O35286	Oxidation	M	528	-	49	50.8	5.75	2.7e-10	854.401	3	-6.7	LGIDDLVHFDFMDPPAPETLMR	Oxidation@12;Oxidation@21	O5072503	31.32	35.2	1.2e-07	1	91007.7	MOUSE	Pre-mRNA-splicing factor ATP-dependent RNA helicase DHX15
[5]	O35286	Oxidation	M	537	-	49	50.8	5.75	2.7e-10	854.401	3	-6.7	LGIDDLVHFDFMDPPAPETLMR	Oxidation@12;Oxidation@21	O5072503	31.32	35.2	1.2e-07	1	91007.7	MOUSE	Pre-mRNA-splicing factor ATP-dependent RNA helicase DHX15
[5]	O35286	Oxidation	M	655	-	49	50.8	5.75	2.7e-10	504.739	2	-6.9	SLMSADNVR	Oxidation@3	O5072503	11.755	26.9	1.7e-05	1	91007.7	MOUSE	Pre-mRNA-splicing factor ATP-dependent RNA helicase DHX15
[6]	Q8BJ71	Oxidation	M	133	-	47	57.9	6.2	1.3e-11	697.334	2	-4.5	ESMLVEWEQVK	Oxidation@3	O5072503	22.392	33.5	1.8e-07	1	93281.9	MOUSE	Nuclear pore complex protein Nup93
[6]	Q8BJ71	Oxidation	M	230	-	47	57.9	6.2	1.3e-11	809.918	2	-3.7	QMTDVVLTPATDALK	Oxidation@2	O5072503	21.951	26.6	7.5e-07	1	93281.9	MOUSE	Nuclear pore complex protein Nup93
[6]	Q8BJ71	Oxidation	M	533	-	47	57.9	6.2	1.3e-11	463.26	2	-4.6	LLMLYTR	Oxidation@3	O5072503	21.013	24.1	0.00011	1	93281.9	MOUSE	Nuclear pore complex protein Nup93
[6]	Q8BJ71	Oxidation	M	582	-	47	57.9	6.2	1.3e-11	484.739	2	-4.8	EFDMILGK	Oxidation@4	O5072503	21.058	19.5	4.8e-05	1	93281.9	MOUSE	Nuclear pore complex protein Nup93
[6]	Q8BJ71	Oxidation	M	798	-	47	57.9	6.2	1.3e-11	684.867	2	-5.5	ALITFAGMIPYR	Oxidation@8	O5072503	26.917	36.6	3.5e-08	1	93281.9	MOUSE	Nuclear pore complex protein Nup93
[7]	P35564	Oxidation	M	110	-	43	59.4	5.72	7.6e-11	591.934	3	-6.6	YDGKWEVDEMKETK	Oxidation@10	O5072503	14.378	24.8	2.1e-06	1	67278.5	MOUSE	Calnexin
[7]	P35564	Oxidation	M	124	-	43	59.4	5.72	7.6e-11	396.224	2	-5.1	GLVLMSR	Oxidation@5	O5072503	15.982	25.8	7.4e-05	1	67278.5	MOUSE	Calnexin
[7]	P35564	Oxidation	M	267	-	43	59.4	5.72	7.6e-11	1485.07	3	-5.6	THLYTLILNPDNSFEILVDQSVVNSGNLLNDMTPPVNPSR	Oxidation@32	O5072503	34.884	27	6.5e-07	1	67278.5	MOUSE	Calnexin
[7]	P35564	Oxidation	M	374	-	43	59.4	5.72	7.6e-11	832.366	3	-2.7	CESAPGCGVWQRPMIDNPNYK	Oxidation@14	O5072503	19.755	28.5	1.3e-07	1	67278.5	MOUSE	Calnexin
[7]	P35564	Oxidation	M	388	-	43	59.4	5.72	7.6e-11	564.788	4	-3.8	WKPPMIDNPNYQGIWKPR	Oxidation@5	O5072503	23.197	24.8	0.00034	1	67278.5	MOUSE	Calnexin
[7]	P35564	Oxidation	M	513	-	43	59.4	5.72	7.6e-11	493.712	2	-7.1	QSNAMEYK	Oxidation@5	O5072503	9.044	20	0.00016	1	67278.5	MOUSE	Calnexin
[7]	P35564	Phospho	S	553	38	43	59.4	5.72	7.6e-11	846.992	3	-5.7	QKSDAEEDGVTGSQDEEDSKPK	Phospho@3=38;Phospho@11|13	O5072503	10.959	27.1	2.4e-07	1	67278.5	MOUSE	Calnexin
[7]	P35564	Phospho	S	582	-	43	59.4	5.72	7.6e-11	754.837	2	-4.5	AEEDEILNRSPR	Phospho@10	O5072503	15.951	23.8	2.2e-06	1	67278.5	MOUSE	Calnexin
[8]	Q8BFY9	Acetyl	K	14	-	33	40.1	6.73	1.2e-10	1274.14	2	-5	MEYEWKPDEQGLQQILQLLK	Oxidation@1;Acetyl@6	O5072503	35.458	19.2	8.1e-05	1	102358	MOUSE	Transportin-1
[8]	Q8BFY9	Oxidation	M	9	-	33	40.1	6.73	1.2e-10	1274.14	2	-5	MEYEWKPDEQGLQQILQLLK	Oxidation@1;Acetyl@6	O5072503	35.458	19.2	8.1e-05	1	102358	MOUSE	Transportin-1
[8]	Q8BFY9	Oxidation	M	183	-	33	40.1	6.73	1.2e-10	924.793	3	-5.4	ICEDSAEILDSDVLDRPLNIMIPK	Oxidation@21	O5072503	29.208	34.3	2.3e-08	1	102358	MOUSE	Transportin-1
[8]	Q8BFY9	Oxidation	M	249	-	33	40.1	6.73	1.2e-10	530.311	2	-7.5	ALVMLLEVR	Oxidation@4	O5072503	26.554	31.6	6.4e-06	3	102358	MOUSE	Transportin-1
[8]	Q8BFY9	Oxidation	M	316	-	33	40.1	6.73	1.2e-10	550.327	2	-6.1	LIPVLVNGMK	Oxidation@9	O5072503	22.069	20.7	1.6e-05	1	102358	MOUSE	Transportin-1
[8-1]	Q99LG2	Oxidation	M	239	-	17	19.1	5.16	1.2e-09	530.311	2	-7.5	ALVMLLEVR	Oxidation@4	O5072503	26.554	31.6	6.4e-06	3	100457	MOUSE	Transportin-2
[8-2]	O14787	Oxidation	M	239	-	16	17.5	5.16	1.2e-09	530.311	2	-7.5	ALVMLLEVR	Oxidation@4	O5072503	26.554	31.6	6.4e-06	3	101389	HUMAN	Transportin-2
[9]	Q9Z1F9	Oxidation	M	97	-	30	57.7	7.7	2.6e-13	900.916	4	-4.5	ESVLQFHPQANIEAHHDSIMNPDYNVEFFR	Oxidation@20	O5072503	25.037	28.9	6.1e-05	1	70569.5	MOUSE	SUMO-activating enzyme subunit 2
[9]	Q9Z1F9	Oxidation	M	113	-	30	57.7	7.7	2.6e-13	725.376	2	-5.2	QFILVMNALDNR	Oxidation@6	O5072503	25.326	39	2.5e-07	1	70569.5	MOUSE	SUMO-activating enzyme subunit 2
[9]	Q9Z1F9	Oxidation	M	269	-	30	57.7	7.7	2.6e-13	450.229	2	-3.7	YLLTMDK	Oxidation@5	O5072503	16.346	15.8	0.00082	1	70569.5	MOUSE	SUMO-activating enzyme subunit 2
[9]	Q9Z1F9	Oxidation	M	350	-	30	57.7	7.7	2.6e-13	940.772	3	-4.6	GDGAELIWDKDDPPAMDFVTSAANLR	Oxidation@16	O5072503	27.306	49.2	2.2e-11	1	70569.5	MOUSE	SUMO-activating enzyme subunit 2
[10]	Q99KI0	Oxidation	M	34	-	32	44.2	6.78	1.5e-11	791.369	2	-3.6	VAMSHFEPSEYIR	Oxidation@3	O5072503	19.605	35.7	5.5e-09	1	85464.2	MOUSE	Aconitate hydratase, mitochondrial
[11]	P07742	Gln->pyro-Glu	Q	530	-	34	48.2	6.28	4.5e-11	1095.02	2	-3.9	QIFETIYYGALEASCELAK	Gln->pyro-Glu@1	O5072503	36.563	44.5	1e-10	1	90211.1	MOUSE	Ribonucleoside-diphosphate reductase large subunit
[11]	P07742	Oxidation	M	14	-	34	48.2	6.28	4.5e-11	328.158	2	-4	VMFDK	Oxidation@2	O5072503	12.034	16.3	0.0012	1	90211.1	MOUSE	Ribonucleoside-diphosphate reductase large subunit
[11]	P07742	Oxidation	M	170	-	34	48.2	6.28	4.5e-11	467.233	3	-5.9	VAERPQHMLMR	Oxidation@8;Oxidation@10	O5072503	9.48	19.1	5.9e-05	1	90211.1	MOUSE	Ribonucleoside-diphosphate reductase large subunit
[11]	P07742	Oxidation	M	172	-	34	48.2	6.28	4.5e-11	467.233	3	-5.9	VAERPQHMLMR	Oxidation@8;Oxidation@10	O5072503	9.48	19.1	5.9e-05	1	90211.1	MOUSE	Ribonucleoside-diphosphate reductase large subunit
[11]	P07742	Oxidation	M	405	-	34	48.2	6.28	4.5e-11	917.445	3	-6	AQQLWYAIIESQTETGTPYMLYK	Oxidation@20	O5072503	32.177	22.3	0.00013	1	90211.1	MOUSE	Ribonucleoside-diphosphate reductase large subunit
[11]	P07742	Oxidation	M	570	-	34	48.2	6.28	4.5e-11	902.449	3	-4.3	GILQYDMWNVAPTDLWDWKPLK	Oxidation@7	O5072503	32.994	36.1	1.2e-08	1	90211.1	MOUSE	Ribonucleoside-diphosphate reductase large subunit
[12]	Q8R050	Oxidation	M	306	-	30	48.4	6.86	2.4e-11	1166.61	2	-5.9	SFVPNMIGGASQADLAVLVISAR	Oxidation@6	O5072503	31.667	54.6	4.1e-11	1	68626.1	MOUSE	Eukaryotic peptide chain release factor GTP-binding subunit ERF3A
[12]	Q8R050	Oxidation	M	342	-	30	48.4	6.86	2.4e-11	408.205	2	-5.2	EHAMLAK	Oxidation@4	O5072503	8.601	26.8	1e-05	1	68626.1	MOUSE	Eukaryotic peptide chain release factor GTP-binding subunit ERF3A
[12]	Q8R050	Oxidation	M	359	-	30	48.4	6.86	2.4e-11	740.309	2	-4.6	MDDPTVNWSNER	Oxidation@1	O5072503	17.702	44.1	2.3e-09	1	68626.1	MOUSE	Eukaryotic peptide chain release factor GTP-binding subunit ERF3A
[12]	Q8R050	Oxidation	M	450	-	30	48.4	6.86	2.4e-11	409.551	3	-5.8	YKDMGTVVLGK	Oxidation@4	O5072503	14.238	24.2	8e-06	1	68626.1	MOUSE	Eukaryotic peptide chain release factor GTP-binding subunit ERF3A
[12]	Q8R050	Oxidation	M	471	-	30	48.4	6.86	2.4e-11	589.286	2	-4.3	GQQLVMMPNK	Oxidation@6;Oxidation@7	O5072503	12.562	31	3.1e-07	1	68626.1	MOUSE	Eukaryotic peptide chain release factor GTP-binding subunit ERF3A
[12]	Q8R050	Oxidation	M	472	-	30	48.4	6.86	2.4e-11	589.286	2	-4.3	GQQLVMMPNK	Oxidation@6;Oxidation@7	O5072503	12.562	31	3.1e-07	1	68626.1	MOUSE	Eukaryotic peptide chain release factor GTP-binding subunit ERF3A
[13]	Q91VR5	Oxidation	M	612	-	29	48.4	6.78	3.8e-11	624.844	2	-4.5	MGLAISLVATEK	Oxidation@1	O5072503	23.716	29.2	1.2e-06	1	82500.9	MOUSE	ATP-dependent RNA helicase DDX1
[14]	Q3U0V1	Oxidation	M	146	50	35	42.5	5.87	6.4e-11	747.368	3	-6.5	TSMTEEYRVPDGMVGLIIGR	Oxidation@3=50	O5072503	28.126	42.9	1.8e-08	1	76776.1	MOUSE	Far upstream element-binding protein 2
[14]	Q3U0V1	Oxidation	M	207	-	35	42.5	5.87	6.4e-11	556.256	2	-5.8	MMLDDIVSR	Oxidation@1;Oxidation@2	O5072503	18.125	30.4	6e-07	1	76776.1	MOUSE	Far upstream element-binding protein 2
[14]	Q3U0V1	Oxidation	M	208	-	35	42.5	5.87	6.4e-11	556.256	2	-5.8	MMLDDIVSR	Oxidation@1;Oxidation@2	O5072503	18.125	30.4	6e-07	1	76776.1	MOUSE	Far upstream element-binding protein 2
[14]	Q3U0V1	Oxidation	M	268	-	35	42.5	5.87	6.4e-11	686.69	3	-4.8	MILIQDGSQNTNVDKPLR	Oxidation@1	O5072503	18.448	19.3	0.00057	1	76776.1	MOUSE	Far upstream element-binding protein 2
[14]	Q3U0V1	Oxidation	M	374	-	35	42.5	5.87	6.4e-11	374.86	3	-5.4	IAHIMGPPDR	Oxidation@5	O5072503	13.132	28	9.3e-07	1	76776.1	MOUSE	Far upstream element-binding protein 2
[15]	Q8BGQ7	Oxidation	M	117	-	27	34.6	6.09	4e-11	931.486	2	-3.8	MALELLTQEFGIPVER	Oxidation@1	O5072503	31.383	41.2	1e-07	1	106910	MOUSE	Alanine--tRNA ligase, cytoplasmic
[15]	Q8BGQ7	Oxidation	M	777	-	27	34.6	6.09	4e-11	426.708	2	-4.7	SLSAMEAK	Oxidation@5	O5072503	9.973	26.2	5.5e-05	1	106910	MOUSE	Alanine--tRNA ligase, cytoplasmic
[16]	P49717	Oxidation	M	649	-	24	33.2	5.89	5.4e-11	758.361	3	-9.1	FDLIFLMLDPQDEAYDRR	Oxidation@7	O5072503	31.916	25.2	1.6e-06	1	96737	MOUSE	DNA replication licensing factor MCM4
[16]	P49717	Oxidation	M	725	-	24	33.2	5.89	5.4e-11	448.716	2	-4.8	GMVSAYPR	Oxidation@2	O5072503	12.313	27.5	7e-06	1	96737	MOUSE	DNA replication licensing factor MCM4
[16]	P49717	Oxidation	M	789	-	24	33.2	5.89	5.4e-11	919.976	2	-4.7	TGIVDISILTTGMSATSR	Oxidation@13	O5072503	27.405	43.9	1.5e-09	1	96737	MOUSE	DNA replication licensing factor MCM4
[17]	Q8CAQ8	Oxidation	M	259	-	28	40.3	5.28	2.3e-10	470.555	3	-6.2	TAMDNSEIAGEKK	Oxidation@3	O5072503	9.532	22.8	2.8e-05	1	83900.8	MOUSE	MICOS complex subunit Mic60
[17]	Q8CAQ8	Oxidation	M	586	-	28	40.3	5.28	2.3e-10	973.495	2	-3.3	TSSAEMPTIPLGSAVEAIR	Oxidation@6	O5072503	25.77	33.1	5.5e-08	1	83900.8	MOUSE	MICOS complex subunit Mic60
[18]	Q3URQ0	Oxidation	M	355	-	18	23.4	6.26	1.7e-10	1077.6	2	-0.46	EPLQVMQQVLNVISLLWK	Oxidation@6	O5072503	36.219	35.2	4.4e-09	1	105210	MOUSE	Testis-expressed protein 10
[18]	Q3URQ0	Oxidation	M	491	-	18	23.4	6.26	1.7e-10	508.268	2	-6.7	LIQMQPNR	Oxidation@4	O5072503	10.999	23.4	0.00027	1	105210	MOUSE	Testis-expressed protein 10
[19]	Q91W50	Oxidation	M	771	-	18	23.6	5.92	3.2e-10	324.198	2	-3.7	LMVLR	Oxidation@2	O5072503	15.69	16.6	0.0062	1	88791.3	MOUSE	Cold shock domain-containing protein E1
[19]	Q91W50	Oxidation	M	783	-	18	23.6	5.92	3.2e-10	627.261	2	-5.7	GPDNSMGFGAER	Oxidation@6	O5072503	13.165	33	1.6e-08	1	88791.3	MOUSE	Cold shock domain-containing protein E1
[20]	Q08943	Met-loss+Acetyl	M	1	-	18	31.5	5.99	3e-11	862.917	2	-6.2	MAETLEFNDIFQEVK	Met-loss+Acetyl@1	O5072503	33.529	47.4	1.2e-08	1	80861.1	MOUSE	FACT complex subunit SSRP1
[21]	P27641	Oxidation	M	84	-	17	34.6	6.02	2.2e-11	629.314	3	-5.1	HLMLPDFDLLEDIGNK	Oxidation@3	O5072503	31.084	38.6	7.9e-08	1	83057.7	MOUSE	X-ray repair cross-complementing protein 5
[21]	P27641	Oxidation	M	115	-	17	34.6	6.02	2.2e-11	893.11	3	-6.6	IQPSSQQADFLDALIVCMDLIQR	Oxidation@18	O5072503	33.858	20	0.00084	1	83057.7	MOUSE	X-ray repair cross-complementing protein 5
[21]	P27641	Oxidation	M	212	-	17	34.6	6.02	2.2e-11	1253.08	2	-3.3	VMLSLEGEDGLDEIYSFSESLR	Oxidation@2	O5072503	33.592	45.7	2.2e-11	1	83057.7	MOUSE	X-ray repair cross-complementing protein 5
[21]	P27641	Oxidation	M	389	-	17	34.6	6.02	2.2e-11	685.354	4	-3.3	DDEAAAVALSSLVHALDELNMVAIVR	Oxidation@21	O5072503	36.411	25.2	0.00045	1	83057.7	MOUSE	X-ray repair cross-complementing protein 5
[21]	P27641	Oxidation	M	461	-	17	34.6	6.02	2.2e-11	808.391	3	-3.7	CTPTEAQLSAIDDLIDSMSLVK	Oxidation@18	O5072503	31.938	25.4	7e-06	1	83057.7	MOUSE	X-ray repair cross-complementing protein 5
[22]	Q922U1	Oxidation	M	482	-	16	25.2	5.59	3.9e-10	375.2	2	-5.5	ISNLMR	Oxidation@5	O5072503	11.077	17.1	0.0012	1	77455.5	MOUSE	U4/U6 small nuclear ribonucleoprotein Prp3
[23]	Q9Z2I0	Oxidation	M	656	-	14	28.3	6.99	4.3e-13	821.423	3	-5.7	LGPSQSTPTGESVISITELISAMK	Oxidation@23	O5072503	31.239	16.3	0.0029	1	82989.3	MOUSE	Mitochondrial proton/calcium exchanger protein
[27]	Q8CJG0	Acetyl	K	845	-	11	15.9	6.06	5.4e-12	493.768	4	8	DHQALAKAVQVHQDTLR	Acetyl@7	O5072503	20.193	16.2	0.048	1	97305.1	MOUSE	Protein argonaute-2
[30]	Q12906	Oxidation	M	266	-	10	12.5	5.09	8.2e-09	539.607	3	-5.8	SIGTANRPMGAGEALR	Oxidation@9	O5072503	13.907	15.6	0.00056	1	95339.2	HUMAN	Interleukin enhancer-binding factor 3
[30]	Q12906	Oxidation	M	336	-	10	12.5	5.09	8.2e-09	536.786	2	-5.4	VLGMDPLPSK	Oxidation@4	O5072503	17.447	31.4	9.2e-07	1	95339.2	HUMAN	Interleukin enhancer-binding factor 3
[31]	P47897	Oxidation	M	171	-	12	12.5	4.1	3.1e-08	536.948	3	-7.2	NEVDMQVLHLLGPK	Oxidation@5	O5072503	25.05	15.2	0.00096	1	87799.5	HUMAN	Glutamine--tRNA ligase
[35]	P54731	Oxidation	M	454	-	7	11.4	5.66	1.9e-10	769.915	2	-3.9	TDQFPLFLIIMGK	Oxidation@11	O5072503	34.438	40.2	2.1e-09	1	73863.7	MOUSE	FAS-associated factor 1
[40]	O54692	Met-loss+Acetyl	M	1	-	5	8.1	5.91	5.4e-10	858.939	2	-5	MASFVTEVLAHSGSLEK	Met-loss+Acetyl@1	O5072503	33.732	51.5	5.4e-10	1	88063.6	MOUSE	Centromere/kinetochore protein zw10 homolog
[50]	Q96PZ0	Acetyl	K	498	-	5	7.6	4.38	2.8e-08	652.039	3	1.3	RIEDYGLKPVPGDLVLK	Acetyl@8	O5072503	22.968	17	0.00065	1	75036.1	HUMAN	Pseudouridylate synthase 7 homolog
[61]	P62304	Oxidation	M	14	-	3	39.1	3.76	7.4e-08	673.383	2	-5.1	VMVQPINLIFR	Oxidation@2	O5072503	29.35	36.5	9.1e-08	1	10803.7	HUMAN	Small nuclear ribonucleoprotein E
[73]	P13645	Oxidation	M	271	-	3	6.2	2.64	3.6e-07	747.381	3	-3.9	ADLEMQIESLTEELAYLKK	Oxidation@5	O5072503	34.297	29.5	3.6e-07	1	58827.5	HUMAN	Keratin, type I cytoskeletal 10
[78]	P62318	Oxidation	M	76	-	2	15.1	3.17	3.4e-07	553.317	2	-4.4	FLILPDMLK	Oxidation@7	O5072503	27.521	16.7	0.00089	1	13916.4	HUMAN	Small nuclear ribonucleoprotein Sm D3
[82]	Q8CGC6	Met-loss+Acetyl	M	1	-	2	2.3	2.49	1.3e-05	488.282	2	-5.8	MAGLTLFVGR	Met-loss+Acetyl@1	O5072503	31.418	33.9	1.3e-05	1	84214.8	MOUSE	RNA-binding protein 28
[84]	P62306	Oxidation	M	84	-	1	15.1	3.4	6.8e-08	777.295	2	-4.9	GVEEEEEDGEMRE	Oxidation@11	O5072503	11.884	34.4	6.8e-08	1	9725.3	HUMAN	Small nuclear ribonucleoprotein F
[91]	P63165	Met-loss+Acetyl	M	1	25	1	16.8	1.79	6.1e-06	597.283	3	-5.7	MSDQEAKPSTEDLGDKK	Met-loss+Acetyl@1=25	O5072503	12.389	25.7	6.1e-06	1	11557.1	HUMAN	Small ubiquitin-related modifier 1

## Sheet: GA Hsp90 band_Mod
Search Name:	O8081302_ITMSms2cid/results4 mod search
						O8081302_ITMSms2cid/results4 mod search
	Acc #	Modification	AA	Site	SLIP	Num Unique	% Cov	Best Disc Score	Best Expect Val	m/z	z	ppm	DB Peptide	Variable Mods	Fraction	RT	Score	Expect	# in DB	Protein MW	Species	Protein Name
[1]	P07901	Oxidation	M	98	-	62	55.5	6.83	9.7e-12	683.372	2	4.8	TLTIVDTGIGMTK	Oxidation@11	O8081302_ITMSms2cid	27.325	49.1	5.2e-10	2	84788.6	MOUSE	Heat shock protein HSP 90-alpha
[1]	P07901	Oxidation	M	180	-	62	55.5	6.83	9.7e-12	490.213	2	3.3	TDTGEPMGR	Oxidation@7	O8081302_ITMSms2cid	8.637	22.2	8.3e-06	1	84788.6	MOUSE	Heat shock protein HSP 90-alpha
[1]	P07901	Oxidation	M	403	-	62	55.5	6.83	9.7e-12	440.217	2	3.3	EMLQQSK	Oxidation@2	O8081302_ITMSms2cid	8.789	21.2	8.2e-05	2	84788.6	MOUSE	Heat shock protein HSP 90-alpha
[1]	P07901	Oxidation	M	475	-	62	55.5	6.83	9.7e-12	783.857	2	4.9	YYTSASGDEMVSLK	Oxidation@10	O8081302_ITMSms2cid	19.446	49	2.1e-09	1	84788.6	MOUSE	Heat shock protein HSP 90-alpha
[1]	P07901	Oxidation	M	576	-	62	55.5	6.83	9.7e-12	503.288	2	3.6	IMKDILEK	Oxidation@2	O8081302_ITMSms2cid	14.626	22.1	0.0031	1	84788.6	MOUSE	Heat shock protein HSP 90-alpha
[1]	P07901	Oxidation	M	611	-	62	55.5	6.83	9.7e-12	1231.57	2	4.6	LVTSPCCIVTSTYGWTANMER	Oxidation@19	O8081302_ITMSms2cid	32.078	41.4	9.9e-10	1	84788.6	MOUSE	Heat shock protein HSP 90-alpha
[1]	P07901	Oxidation	M	626	-	62	55.5	6.83	9.7e-12	610.752	2	3.1	DNSTMGYMAAK	Oxidation@5;Oxidation@8	O8081302_ITMSms2cid	10.347	31	3.6e-07	1	84788.6	MOUSE	Heat shock protein HSP 90-alpha
[1]	P07901	Oxidation	M	629	-	62	55.5	6.83	9.7e-12	610.752	2	3.1	DNSTMGYMAAK	Oxidation@5;Oxidation@8	O8081302_ITMSms2cid	10.347	31	3.6e-07	1	84788.6	MOUSE	Heat shock protein HSP 90-alpha
[1-1]	P11499	Oxidation	M	93	-	56	51.9	8.05	2.7e-14	683.372	2	4.8	TLTLVDTGIGMTK	Oxidation@11	O8081302_ITMSms2cid	27.325	49.1	5.2e-10	2	83281.9	MOUSE	Heat shock protein HSP 90-beta
[1-1]	P11499	Oxidation	M	394	-	56	51.9	8.05	2.7e-14	440.217	2	3.3	EMLQQSK	Oxidation@2	O8081302_ITMSms2cid	8.789	21.2	8.2e-05	2	83281.9	MOUSE	Heat shock protein HSP 90-beta
[1-1]	P11499	Oxidation	M	466	-	56	51.9	8.05	2.7e-14	1096.98	2	4.9	YHTSQSGDEMTSLSEYVSR	Oxidation@10	O8081302_ITMSms2cid	21.556	48.6	8.7e-12	1	83281.9	MOUSE	Heat shock protein HSP 90-beta
[1-1]	P11499	Oxidation	M	513	-	56	51.9	8.05	2.7e-14	1232.58	2	3.6	GFEVVYMTEPIDEYCVQQLK	Oxidation@7	O8081302_ITMSms2cid	32.909	39.3	4.7e-10	1	83281.9	MOUSE	Heat shock protein HSP 90-beta
[1-1]	P11499	Oxidation	M	602	-	56	51.9	8.05	2.7e-14	1224.56	2	4.1	LVSSPCCIVTSTYGWTANMER	Oxidation@19	O8081302_ITMSms2cid	31.273	37.1	1.9e-09	1	83281.9	MOUSE	Heat shock protein HSP 90-beta
[1-1]	P11499	Oxidation	M	617	17	56	51.9	8.05	2.7e-14	640.753	2	2.8	DNSTMGYMMAK	Oxidation@5=17;Oxidation@8=6	O8081302_ITMSms2cid	13.711	30.2	1.5e-07	1	83281.9	MOUSE	Heat shock protein HSP 90-beta
[1-1]	P11499	Oxidation	M	620	30	56	51.9	8.05	2.7e-14	640.754	2	4.2	DNSTMGYMMAK	Oxidation@8=30;Oxidation@9=36	O8081302_ITMSms2cid	13.127	38.6	1e-08	1	83281.9	MOUSE	Heat shock protein HSP 90-beta
[1-1]	P11499	Oxidation	M	621	36	56	51.9	8.05	2.7e-14	640.754	2	4.2	DNSTMGYMMAK	Oxidation@8=30;Oxidation@9=36	O8081302_ITMSms2cid	13.127	38.6	1e-08	1	83281.9	MOUSE	Heat shock protein HSP 90-beta
[2]	Q8VIJ6	Gln->pyro-Glu	Q	584	-	27	30.8	5.6	3.4e-10	519.238	2	3.1	QREESYSR	Gln->pyro-Glu@1	O8081302_ITMSms2cid	10.361	24.7	2.4e-05	1	75442.3	MOUSE	Splicing factor, proline- and glutamine-rich
[2]	Q8VIJ6	Oxidation	M	38	-	27	30.8	5.6	3.4e-10	642.314	2	3.3	SPPPGMGLNQNR	Oxidation@6	O8081302_ITMSms2cid	11.889	24.2	5.6e-06	1	75442.3	MOUSE	Splicing factor, proline- and glutamine-rich
[2]	Q8VIJ6	Oxidation	M	349	-	27	30.8	5.6	3.4e-10	532.242	2	4.2	AELDDTPMR	Oxidation@8	O8081302_ITMSms2cid	12.696	31.2	3.7e-06	1	75442.3	MOUSE	Splicing factor, proline- and glutamine-rich
[2]	Q8VIJ6	Oxidation	M	492	-	27	30.8	5.6	3.4e-10	434.193	2	3.1	SLDEMEK	Oxidation@5	O8081302_ITMSms2cid	9.516	23.3	6.4e-05	1	75442.3	MOUSE	Splicing factor, proline- and glutamine-rich
[2]	Q8VIJ6	Oxidation	M	675	-	27	30.8	5.6	3.4e-10	568.764	2	4.9	GMGPGTPAGYGR	Oxidation@2	O8081302_ITMSms2cid	13.188	28.8	7.6e-07	1	75442.3	MOUSE	Splicing factor, proline- and glutamine-rich
[3]	Q3U0V1	Oxidation	M	208	10	26	31.4	5.44	1.9e-09	548.264	2	3.9	MMLDDIVSR	Oxidation@2=10	O8081302_ITMSms2cid	25.403	27.7	5.6e-07	1	76776.1	MOUSE	Far upstream element-binding protein 2
[3]	Q3U0V1	Oxidation	M	268	-	26	31.4	5.44	1.9e-09	686.696	3	3.8	MILIQDGSQNTNVDKPLR	Oxidation@1	O8081302_ITMSms2cid	21.665	23.9	2.6e-05	1	76776.1	MOUSE	Far upstream element-binding protein 2
[3]	Q3U0V1	Oxidation	M	374	-	26	31.4	5.44	1.9e-09	374.864	3	4.2	IAHIMGPPDR	Oxidation@5	O8081302_ITMSms2cid	14.308	24.8	9.3e-06	1	76776.1	MOUSE	Far upstream element-binding protein 2
[5]	P63017	Oxidation	M	61	-	20	35.4	6.3	2.6e-11	833.402	2	4.5	NQVAMNPTNTVFDAK	Oxidation@5	O8081302_ITMSms2cid	21.521	50	2.4e-09	1	70871.6	MOUSE	Heat shock cognate 71 kDa protein
[6]	P58252	Met-loss	M	1	-	18	20.5	5.3	5.8e-09	546.297	2	2.5	MVNFTVDQIR	Met-loss@1	O8081302_ITMSms2cid	24.661	37.5	1.8e-06	1	95314.9	MOUSE	Elongation factor 2
[7]	Q501J6	Oxidation	M	251	-	17	28.9	5.14	4.7e-09	684.821	2	4.7	MLDMGFEPQIR	Oxidation@1;Oxidation@4	O8081302_ITMSms2cid	24.286	33.1	6.5e-07	4	72400.1	MOUSE	Probable ATP-dependent RNA helicase DDX17
[7]	Q501J6	Oxidation	M	254	-	17	28.9	5.14	4.7e-09	684.821	2	4.7	MLDMGFEPQIR	Oxidation@1;Oxidation@4	O8081302_ITMSms2cid	24.286	33.1	6.5e-07	4	72400.1	MOUSE	Probable ATP-dependent RNA helicase DDX17
[7-1]	P16381	Oxidation	M	351	-	8	11.5	3.08	3.6e-07	684.821	2	4.7	MLDMGFEPQIR	Oxidation@1;Oxidation@4	O8081302_ITMSms2cid	24.286	33.1	6.5e-07	4	73141.2	MOUSE	Putative ATP-dependent RNA helicase Pl10
[7-1]	P16381	Oxidation	M	354	-	8	11.5	3.08	3.6e-07	684.821	2	4.7	MLDMGFEPQIR	Oxidation@1;Oxidation@4	O8081302_ITMSms2cid	24.286	33.1	6.5e-07	4	73141.2	MOUSE	Putative ATP-dependent RNA helicase Pl10
[7-2]	Q62095	Oxidation	M	351	-	8	11.6	3.08	3.6e-07	684.821	2	4.7	MLDMGFEPQIR	Oxidation@1;Oxidation@4	O8081302_ITMSms2cid	24.286	33.1	6.5e-07	4	73428.5	MOUSE	ATP-dependent RNA helicase DDX3Y
[7-2]	Q62095	Oxidation	M	354	-	8	11.6	3.08	3.6e-07	684.821	2	4.7	MLDMGFEPQIR	Oxidation@1;Oxidation@4	O8081302_ITMSms2cid	24.286	33.1	6.5e-07	4	73428.5	MOUSE	ATP-dependent RNA helicase DDX3Y
[7-3]	Q62167	Oxidation	M	352	-	8	11.5	3.08	3.6e-07	684.821	2	4.7	MLDMGFEPQIR	Oxidation@1;Oxidation@4	O8081302_ITMSms2cid	24.286	33.1	6.5e-07	4	73102	MOUSE	ATP-dependent RNA helicase DDX3X
[7-3]	Q62167	Oxidation	M	355	-	8	11.5	3.08	3.6e-07	684.821	2	4.7	MLDMGFEPQIR	Oxidation@1;Oxidation@4	O8081302_ITMSms2cid	24.286	33.1	6.5e-07	4	73102	MOUSE	ATP-dependent RNA helicase DDX3X
[12]	Q8VEK3	Oxidation	M	510	-	10	11.9	4.78	2.9e-08	699.853	2	4	YNILGTNTIMDK	Oxidation@10	O8081302_ITMSms2cid	25.181	39.9	5.5e-08	1	87918.4	MOUSE	Heterogeneous nuclear ribonucleoprotein U
[20]	Q8VDM6	Oxidation	M	460	-	6	6.5	6.27	6.8e-10	684.847	2	3.6	YNILGTNAIMDK	Oxidation@10	O8081302_ITMSms2cid	25.691	30.8	6.1e-07	1	96002.7	MOUSE	Heterogeneous nuclear ribonucleoprotein U-like protein 1
[22]	Q64213	Met-loss+Acetyl	M	1	72	7	16.1	4.53	4.9e-08	780.412	2	6.2	MATGANATPLDFPSKK	Met-loss+Acetyl@1=72	O8081302_ITMSms2cid	24.272	29.4	2.5e-06	1	70403.6	MOUSE	Splicing factor 1
[23]	Q61584	Oxidation	M	332	-	9	13.6	3.41	3.6e-08	721.36	2	5.9	EDGMVPFVFVGTK	Oxidation@4	O8081302_ITMSms2cid	31.733	26.1	1.5e-07	1	76222.6	MOUSE	Fragile X mental retardation syndrome-related protein 1
[27]	P02535	Oxidation	M	148	-	6	8.8	4.44	1.8e-08	553.768	2	2.4	VTMQNLNDR	Oxidation@3	O8081302_ITMSms2cid	10.708	32	5.4e-06	3	57770.3	MOUSE	Keratin, type I cytoskeletal 10
[27-1]	Q61781	Oxidation	M	125	-	4	6.4	3.91	1.1e-08	553.768	2	2.4	VTMQNLNDR	Oxidation@3	O8081302_ITMSms2cid	10.708	32	5.4e-06	3	52867.4	MOUSE	Keratin, type I cytoskeletal 14
[27-2]	Q61414	Oxidation	M	102	-	4	5.5	3.01	2.6e-06	553.768	2	2.4	VTMQNLNDR	Oxidation@3	O8081302_ITMSms2cid	10.708	32	5.4e-06	3	49138	MOUSE	Keratin, type I cytoskeletal 15
[29]	Q01853	Met-loss+Acetyl	M	1	20	5	7.6	4.52	1.3e-07	845.933	2	5.8	MASGADSKGDDLSTAILK	Met-loss+Acetyl@1=20	O8081302_ITMSms2cid	25.677	46.6	1.3e-07	1	89322.6	MOUSE	Transitional endoplasmic reticulum ATPase
[36]	P04370	Oxidation	M	153	-	4	17.6	3.95	7.5e-08	676.82	2	4.3	YLATASTMDHAR	Oxidation@8	O8081302_ITMSms2cid	11.742	36	7.5e-08	1	27167.8	MOUSE	Myelin basic protein
[57]	P10853	Oxidation	M	60	-	2	19	4.25	7.7e-09	888.409	2	1.5	AMGIMNSFVNDIFER	Oxidation@2;Oxidation@5	O8081302_ITMSms2cid	34.876	39.3	7.7e-09	1	13936.3	MOUSE	Histone H2B type 1-F/J/L
[57]	P10853	Oxidation	M	63	-	2	19	4.25	7.7e-09	888.409	2	1.5	AMGIMNSFVNDIFER	Oxidation@2;Oxidation@5	O8081302_ITMSms2cid	34.876	39.3	7.7e-09	1	13936.3	MOUSE	Histone H2B type 1-F/J/L

## Sheet: MS sample Log
Samples			Run #
Hsp90 band from PU-H71 pull-down			O5041002
Hsp90 band from cell lysate			O5072503
Hsp90 band from GA pull-down			O8081302
