# Supplementary material for: Phosphorylation-driven epichaperome assembly is a regulator of cellular adaptability and proliferation
Source: Nat Commun. 2024 Oct 16;15:8912. doi: 10.1038/s41467-024-53178-5 (PMC11484706; doi:10.1038/s41467-024-53178-5)
Supplement: Supplementary file 6 — Supplementary Data 4 [file 41467_2024_53178_MOESM6_ESM.xlsx]

## Sheet: Nature 2016 ModSearch
Search Name:	Nature 2016/results2 phospho search
						Nature 2016/results2 phospho search
	Acc #	Modification	AA	Site	SLIP	Num Unique	% Cov	Best Disc Score	Best Expect Val	m/z	z	ppm	DB Peptide	Variable Mods	Fraction	RT	Score	Expect	# in DB	Protein MW	Species	Protein Name
[1]	P07900	Oxidation	M	98	-	71	65.8	8.02	1.3e-14	683.37	2	2.7	TLTIVDTGIGMTK	Oxidation@11	450AB_S2_B6R1_IBL1_ITMSms2cid	91.999	44	2.8e-11	2	84660.4	HUMAN	Heat shock protein HSP 90-alpha
[1]	P07900	Oxidation	M	402	-	71	65.8	8.02	1.3e-14	617.342	2	-8.8	EMLQQSKILK	Oxidation@2	450AB_S2_B6R1_IBL1_ITMSms2cid	30.874	16.3	0.0067	3	84660.4	HUMAN	Heat shock protein HSP 90-alpha
[1]	P07900	Oxidation	M	474	-	71	65.8	8.02	1.3e-14	783.85	2	-4.1	YYTSASGDEMVSLK	Oxidation@10	769AB_S1_B6R2_NCI-H1975_ITMSms2cid	50.226	43.2	8.7e-11	1	84660.4	HUMAN	Heat shock protein HSP 90-alpha
[1]	P07900	Oxidation	M	484	-	71	65.8	8.02	1.3e-14	999.999	2	-2.3	MKENQKHIYYITGETK	Oxidation@1	450AB_S2_B6R1_IBL1_ITMSms2cid	29.48	25.4	6.5e-07	1	84660.4	HUMAN	Heat shock protein HSP 90-alpha
[1]	P07900	Oxidation	M	575	-	71	65.8	8.02	1.3e-14	503.284	2	-3.4	IMKDILEK	Oxidation@2	450AB_S2_B6R1_IBL1_ITMSms2cid	30.234	24.9	0.00019	1	84660.4	HUMAN	Heat shock protein HSP 90-alpha
[1]	P07900	Oxidation	M	614	-	71	65.8	8.02	1.3e-14	473.776	2	-5	IMKAQALR	Oxidation@2	769AB_S1_B6R2_NCI-H1975_ITMSms2cid	21.573	20.8	2.1e-05	2	84660.4	HUMAN	Heat shock protein HSP 90-alpha
[1]	P07900	Oxidation	M	625	-	71	65.8	8.02	1.3e-14	587.274	3	-2.2	AQALRDNSTMGYMAAK	Oxidation@10;Oxidation@13	769AB_S1_D6R1_MRC5_ITMSms2cid	24.883	35.4	1.6e-08	1	84660.4	HUMAN	Heat shock protein HSP 90-alpha
[1]	P07900	Oxidation	M	628	-	71	65.8	8.02	1.3e-14	587.274	3	-2.2	AQALRDNSTMGYMAAK	Oxidation@10;Oxidation@13	769AB_S1_D6R1_MRC5_ITMSms2cid	24.883	35.4	1.6e-08	1	84660.4	HUMAN	Heat shock protein HSP 90-alpha
[1]	P07900	Oxidation	M	716	-	71	65.8	8.02	1.3e-14	1782.27	2	0.5	LGLGIDEDDPTADDTSAAVTEEMPPLEGDDDTSR	Oxidation@23	450AB_1_A7R1_Daudi_ITMSms2cid	42.355	43.6	5.1e-13	1	84660.4	HUMAN	Heat shock protein HSP 90-alpha
[1]	P07900	Oxidation	M	728	-	71	65.8	8.02	1.3e-14	1394.93	3	4.4	LGLGIDEDDPTADDTSAAVTEEMPPLEGDDDTSRMEEVD	Oxidation@23;Oxidation@35	450AB_1_A7R1_Daudi_ITMSms2cid	57.319	23.2	2.6e-07	1	84660.4	HUMAN	Heat shock protein HSP 90-alpha
[1]	P07900	Phospho	S	231	-	71	65.8	8.02	1.3e-14	590.99	4	-4.9	DKEVSDDEAEEKEDKEEEK	Phospho@5	769AB_S1_B6R2_NCI-H1975_ITMSms2cid	23.989	18.3	0.00087	1	84660.4	HUMAN	Heat shock protein HSP 90-alpha
[1]	P07900	Phospho	S	263	50	71	65.8	8.02	1.3e-14	800.996	3	-3.2	ESEDKPEIEDVGSDEEEEKK	Phospho@13=50	769AB_S1_B6R2_NCI-H1975_ITMSms2cid	29.896	24.8	9.9e-07	1	84660.4	HUMAN	Heat shock protein HSP 90-alpha
[1-1]	P08238	Oxidation	M	93	-	68	66.3	8.4	1.2e-15	683.37	2	2.7	TLTLVDTGIGMTK	Oxidation@11	450AB_S2_B6R1_IBL1_ITMSms2cid	91.999	44	2.8e-11	2	83264.9	HUMAN	Heat shock protein HSP 90-beta
[1-1]	P08238	Oxidation	M	394	-	68	66.3	8.4	1.2e-15	617.342	2	-8.8	EMLQQSKILK	Oxidation@2	450AB_S2_B6R1_IBL1_ITMSms2cid	30.874	16.3	0.0067	3	83264.9	HUMAN	Heat shock protein HSP 90-beta
[1-1]	P08238	Oxidation	M	466	-	68	66.3	8.4	1.2e-15	1096.97	2	-2.6	YHTSQSGDEMTSLSEYVSR	Oxidation@10	809AB_S1_C6R1_MDA-Mb-468_ITMSms2cid	33.382	50.2	1.2e-15	1	83264.9	HUMAN	Heat shock protein HSP 90-beta
[1-1]	P08238	Oxidation	M	553	-	68	66.3	8.4	1.2e-15	1147.04	2	-3.2	EGLELPEDEEEKKKMEESK	Oxidation@15	769AB_S1_B6R2_NCI-H1975_ITMSms2cid	28.555	24.3	7.4e-07	2	83264.9	HUMAN	Heat shock protein HSP 90-beta
[1-1]	P08238	Oxidation	M	567	-	68	66.3	8.4	1.2e-15	503.285	2	-2	LMKEILDK	Oxidation@2	809AB_S1_C6R1_MDA-Mb-468_ITMSms2cid	25.261	25.1	0.00016	2	83264.9	HUMAN	Heat shock protein HSP 90-beta
[1-1]	P08238	Oxidation	M	606	-	68	66.3	8.4	1.2e-15	473.776	2	-5	IMKAQALR	Oxidation@2	769AB_S1_B6R2_NCI-H1975_ITMSms2cid	21.573	20.8	2.1e-05	2	83264.9	HUMAN	Heat shock protein HSP 90-beta
[1-1]	P08238	Oxidation	M	617	18	68	66.3	8.4	1.2e-15	640.75	2	-1.8	DNSTMGYMMAK	Oxidation@5=18;Oxidation@8|9	769AB_S1_D6R1_MRC5_ITMSms2cid	27.351	39.9	3.3e-08	2	83264.9	HUMAN	Heat shock protein HSP 90-beta
[1-1]	P08238	Oxidation	M	620	28	68	66.3	8.4	1.2e-15	640.75	2	-2.1	DNSTMGYMMAK	Oxidation@8=28;Oxidation@9=33	809AB_S1_C6R1_MDA-Mb-468_ITMSms2cid	26.507	36.9	4.9e-08	2	83264.9	HUMAN	Heat shock protein HSP 90-beta
[1-1]	P08238	Oxidation	M	621	33	68	66.3	8.4	1.2e-15	640.75	2	-2.1	DNSTMGYMMAK	Oxidation@8=28;Oxidation@9=33	809AB_S1_C6R1_MDA-Mb-468_ITMSms2cid	26.507	36.9	4.9e-08	2	83264.9	HUMAN	Heat shock protein HSP 90-beta
[1-1]	P08238	Oxidation	M	720	-	68	66.3	8.4	1.2e-15	1384.61	3	-7.4	LGLGIDEDEVAAEEPNAAVPDEIPPLEGDEDASRMEEVD	Oxidation@35	450AB_1_A7R1_Daudi_ITMSms2cid	60.357	27.4	1.3e-07	1	83264.9	HUMAN	Heat shock protein HSP 90-beta
[1-1]	P08238	Phospho	S	226	-	68	66.3	8.4	1.2e-15	790.576	4	-2.8	EISDDEAEEEKGEKEEEDKDDEEKPK	Phospho@3	769AB_S1_B6R2_NCI-H1975_ITMSms2cid	27.276	28.6	8.6e-06	2	83264.9	HUMAN	Heat shock protein HSP 90-beta
[1-1]	P08238	Phospho	S	255	50	68	66.3	8.4	1.2e-15	909.35	2	-2.1	IEDVGSDEEDDSGKDK	Phospho@6=50	450AB_S2_B6R1_IBL1_ITMSms2cid	29.875	28.8	6.2e-09	1	83264.9	HUMAN	Heat shock protein HSP 90-beta
[1-2]	Q58FF7	Oxidation	M	336	-	38	33.8	6.89	1.2e-11	617.342	2	-8.8	EMLQQSKILK	Oxidation@2	450AB_S2_B6R1_IBL1_ITMSms2cid	30.874	16.3	0.0067	3	68325.4	HUMAN	Putative heat shock protein HSP 90-beta-3
[1-2]	Q58FF7	Oxidation	M	426	-	38	33.8	6.89	1.2e-11	1147.04	2	-3.2	EGLELPEDEEEKKKMEESK	Oxidation@15	769AB_S1_B6R2_NCI-H1975_ITMSms2cid	28.555	24.3	7.4e-07	2	68325.4	HUMAN	Putative heat shock protein HSP 90-beta-3
[1-2]	Q58FF7	Oxidation	M	440	-	38	33.8	6.89	1.2e-11	503.285	2	-2	LMKEILDK	Oxidation@2	809AB_S1_C6R1_MDA-Mb-468_ITMSms2cid	25.261	25.1	0.00016	2	68325.4	HUMAN	Putative heat shock protein HSP 90-beta-3
[1-2]	Q58FF7	Oxidation	M	490	18	38	33.8	6.89	1.2e-11	640.75	2	-1.8	DNSTMGYMMAK	Oxidation@5=18;Oxidation@8|9	769AB_S1_D6R1_MRC5_ITMSms2cid	27.351	39.9	3.3e-08	2	68325.4	HUMAN	Putative heat shock protein HSP 90-beta-3
[1-2]	Q58FF7	Oxidation	M	493	28	38	33.8	6.89	1.2e-11	640.75	2	-2.1	DNSTMGYMMAK	Oxidation@8=28;Oxidation@9=33	809AB_S1_C6R1_MDA-Mb-468_ITMSms2cid	26.507	36.9	4.9e-08	2	68325.4	HUMAN	Putative heat shock protein HSP 90-beta-3
[1-2]	Q58FF7	Oxidation	M	494	33	38	33.8	6.89	1.2e-11	640.75	2	-2.1	DNSTMGYMMAK	Oxidation@8=28;Oxidation@9=33	809AB_S1_C6R1_MDA-Mb-468_ITMSms2cid	26.507	36.9	4.9e-08	2	68325.4	HUMAN	Putative heat shock protein HSP 90-beta-3
[1-2]	Q58FF7	Phospho	S	205	-	38	33.8	6.89	1.2e-11	790.576	4	-2.8	EISDDEAEEEKGEKEEEDKDDEEKPK	Phospho@3	769AB_S1_B6R2_NCI-H1975_ITMSms2cid	27.276	28.6	8.6e-06	2	68325.4	HUMAN	Putative heat shock protein HSP 90-beta-3
[2]	Q15149	Oxidation	M	308	-	73	18.4	6.4	1.8e-11	534.761	2	1	MVEGYQGLR	Oxidation@1	769AB_S2_E8R1_HMEC_ITMSms2cid	29.741	22.2	1.7e-05	1	531795	HUMAN	Plectin
[2]	Q15149	Oxidation	M	399	-	73	18.4	6.4	1.8e-11	866.433	2	-1.7	SIITYVSSLYDAMPR	Oxidation@13	769AB_S2_E8R1_HMEC_ITMSms2cid	45.518	39.8	1.2e-09	1	531795	HUMAN	Plectin
[2]	Q15149	Oxidation	M	464	-	73	18.4	6.4	1.8e-11	554.788	2	-2.3	FKEMELPAK	Oxidation@4	769AB_S2_E8R1_HMEC_ITMSms2cid	26.061	20.3	8.5e-05	1	531795	HUMAN	Plectin
[2]	Q15149	Oxidation	M	2976	-	73	18.4	6.4	1.8e-11	588.733	2	-3.1	GYFDEEMNR	Oxidation@7	769AB_S2_E8R1_HMEC_ITMSms2cid	31.837	19.8	2.1e-06	1	531795	HUMAN	Plectin
[2]	Q15149	Oxidation	M	3190	-	73	18.4	6.4	1.8e-11	983.837	3	-0.94	DLLPSDMAVALLEAQAGTGHIIDPATSAR	Oxidation@7	769AB_S2_E8R1_HMEC_ITMSms2cid	44.926	31.8	7e-08	1	531795	HUMAN	Plectin
[2]	Q15149	Oxidation	M	3588	-	73	18.4	6.4	1.8e-11	894.92	2	-7.8	DPYSGSTISLFQAMQK	Oxidation@14	769AB_S2_E8R1_HMEC_ITMSms2cid	39.713	46	4.2e-11	1	531795	HUMAN	Plectin
[2]	Q15149	Phospho	T	4444	13	73	18.4	6.4	1.8e-11	1071.51	4	8.7	VSITEAMHRNLVDNITGQRLLEAQACTGGIIDPSTGER	Phospho@16=13;Phospho@27|34|35	809AB_S1_C6R1_MDA-Mb-468_ITMSms2cid	71.233	17.3	0.0075	1	531795	HUMAN	Plectin
[3]	P12814	Gln->pyro-Glu	Q	419	-	56	53.4	6.72	7.5e-12	754.876	2	-2.1	QKDYETATLSEIK	Gln->pyro-Glu@1	769AB_S2_E8R1_HMEC_ITMSms2cid	35.924	35.3	1.6e-08	1	103058	HUMAN	Alpha-actinin-1
[3]	P12814	Gln->pyro-Glu	Q	634	-	56	53.4	6.72	7.5e-12	870.955	2	-2.6	QFGAQANVIGPWIQTK	Gln->pyro-Glu@1	769AB_S2_E8R1_HMEC_ITMSms2cid	46.469	36.5	9.7e-08	1	103058	HUMAN	Alpha-actinin-1
[3]	P12814	Oxidation	M	122	-	56	53.4	6.72	7.5e-12	740.405	2	-2.1	MTLGMIWTIILR	Oxidation@1;Oxidation@5	769AB_S2_E8R1_HMEC_ITMSms2cid	48.069	37.4	6.2e-07	2	103058	HUMAN	Alpha-actinin-1
[3]	P12814	Oxidation	M	126	-	56	53.4	6.72	7.5e-12	740.405	2	-2.1	MTLGMIWTIILR	Oxidation@1;Oxidation@5	769AB_S2_E8R1_HMEC_ITMSms2cid	48.069	37.4	6.2e-07	2	103058	HUMAN	Alpha-actinin-1
[3]	P12814	Oxidation	M	221	-	56	53.4	6.72	7.5e-12	888.426	2	-2.4	MLDAEDIVGTARPDEK	Oxidation@1	769AB_S2_E8R1_HMEC_ITMSms2cid	34.609	41.2	2.7e-10	1	103058	HUMAN	Alpha-actinin-1
[3]	P12814	Oxidation	M	239	-	56	53.4	6.72	7.5e-12	1012.48	2	-4.4	AIMTYVSSFYHAFSGAQK	Oxidation@3	769AB_S2_E8R1_HMEC_ITMSms2cid	42.334	39.9	1.4e-11	2	103058	HUMAN	Alpha-actinin-1
[3]	P12814	Oxidation	M	276	-	56	53.4	6.72	7.5e-12	1034.48	2	-2.8	VLAVNQENEQLMEDYEK	Oxidation@12	769AB_S1_B6R2_NCI-H1975_ITMSms2cid	35.511	44.3	1.6e-11	1	103058	HUMAN	Alpha-actinin-1
[3]	P12814	Oxidation	M	309	33	56	53.4	6.72	7.5e-12	477.222	3	-3.6	VPENTMHAMQQK	Oxidation@9=33	769AB_S2_E8R1_HMEC_ITMSms2cid	20.799	20.7	1.3e-05	1	103058	HUMAN	Alpha-actinin-1
[3]	P12814	Oxidation	M	354	-	56	53.4	6.72	7.5e-12	493.245	3	-1.8	LSNRPAFMPSEGR	Oxidation@8	769AB_S1_D6R1_MRC5_ITMSms2cid	27.155	30.2	6.4e-07	1	103058	HUMAN	Alpha-actinin-1
[3]	P12814	Oxidation	M	660	-	56	53.4	6.72	7.5e-12	499.503	4	-2.5	ISIEMHGTLEDQLSHLR	Oxidation@5	769AB_S2_E8R1_HMEC_ITMSms2cid	37.039	33.2	3.6e-06	1	103058	HUMAN	Alpha-actinin-1
[3]	P12814	Oxidation	M	710	-	56	53.4	6.72	7.5e-12	439.87	3	-2.7	HTNYTMEHIR	Oxidation@6	769AB_S2_E8R1_HMEC_ITMSms2cid	23.071	23.5	4.3e-06	2	103058	HUMAN	Alpha-actinin-1
[3]	P12814	Oxidation	M	748	-	56	53.4	6.72	7.5e-12	677.804	2	-2.9	GISQEQMNEFR	Oxidation@7	769AB_S2_E8R1_HMEC_ITMSms2cid	30.245	27.8	1.9e-07	1	103058	HUMAN	Alpha-actinin-1
[3]	P12814	Oxidation	M	796	-	56	53.4	6.72	7.5e-12	530.775	2	-3	IMSIVDPNR	Oxidation@2	769AB_S2_E8R1_HMEC_ITMSms2cid	29.813	25.7	1.9e-06	1	103058	HUMAN	Alpha-actinin-1
[3]	P12814	Oxidation	M	830	-	56	53.4	6.72	7.5e-12	873.373	2	-8	ETADTDTADQVMASFK	Oxidation@12	769AB_S1_D6R1_MRC5_ITMSms2cid	33.565	50.5	7.5e-12	1	103058	HUMAN	Alpha-actinin-1
[3]	P12814	Oxidation	M	845	-	56	53.4	6.72	7.5e-12	884.452	2	0.77	ILAGDKNYITMDELR	Oxidation@11	769AB_S2_E8R1_HMEC_ITMSms2cid	34.193	41.8	2e-09	1	103058	HUMAN	Alpha-actinin-1
[3-1]	O43707	Gln->pyro-Glu	Q	653	-	50	56.6	5.91	1.4e-11	878.955	2	0.36	QFASQANVVGPWIQTK	Gln->pyro-Glu@1	769AB_S2_E8R1_HMEC_ITMSms2cid	44.707	37.7	1e-07	1	104855	HUMAN	Alpha-actinin-4
[3-1]	O43707	Oxidation	M	141	-	50	56.6	5.91	1.4e-11	740.405	2	-2.1	MTLGMIWTIILR	Oxidation@1;Oxidation@5	769AB_S2_E8R1_HMEC_ITMSms2cid	48.069	37.4	6.2e-07	2	104855	HUMAN	Alpha-actinin-4
[3-1]	O43707	Oxidation	M	145	-	50	56.6	5.91	1.4e-11	740.405	2	-2.1	MTLGMIWTIILR	Oxidation@1;Oxidation@5	769AB_S2_E8R1_HMEC_ITMSms2cid	48.069	37.4	6.2e-07	2	104855	HUMAN	Alpha-actinin-4
[3-1]	O43707	Oxidation	M	240	-	50	56.6	5.91	1.4e-11	916.936	2	-2.2	MLDAEDIVNTARPDEK	Oxidation@1	769AB_S1_D6R1_MRC5_ITMSms2cid	35.137	42	7e-10	1	104855	HUMAN	Alpha-actinin-4
[3-1]	O43707	Oxidation	M	258	-	50	56.6	5.91	1.4e-11	1012.48	2	-4.4	AIMTYVSSFYHAFSGAQK	Oxidation@3	769AB_S2_E8R1_HMEC_ITMSms2cid	42.334	39.9	1.4e-11	2	104855	HUMAN	Alpha-actinin-4
[3-1]	O43707	Oxidation	M	295	-	50	56.6	5.91	1.4e-11	1038.98	2	-0.16	VLAVNQENEHLMEDYEK	Oxidation@12	769AB_S2_E8R1_HMEC_ITMSms2cid	31.73	36.4	2.5e-10	1	104855	HUMAN	Alpha-actinin-4
[3-1]	O43707	Oxidation	M	373	-	50	56.6	5.91	1.4e-11	725.36	2	-2.3	LSNRPAFMPSEGK	Oxidation@8	769AB_S2_E8R1_HMEC_ITMSms2cid	26.595	30.2	2.2e-07	1	104855	HUMAN	Alpha-actinin-4
[3-1]	O43707	Oxidation	M	729	-	50	56.6	5.91	1.4e-11	439.87	3	-2.7	HTNYTMEHIR	Oxidation@6	769AB_S2_E8R1_HMEC_ITMSms2cid	23.071	23.5	4.3e-06	2	104855	HUMAN	Alpha-actinin-4
[3-1]	O43707	Oxidation	M	767	-	50	56.6	5.91	1.4e-11	684.812	2	-2.9	GISQEQMQEFR	Oxidation@7	769AB_S2_E8R1_HMEC_ITMSms2cid	30.033	34.6	6.6e-08	1	104855	HUMAN	Alpha-actinin-4
[3-1]	O43707	Oxidation	M	883	-	50	56.6	5.91	1.4e-11	904.928	2	-1.8	MAPYQGPDAVPGALDYK	Oxidation@1	769AB_S2_E8R1_HMEC_ITMSms2cid	36.193	45.4	5.8e-11	1	104855	HUMAN	Alpha-actinin-4
[3-1]	O43707	Phospho	Y	878	13	50	56.6	5.91	1.4e-11	893.657	4	-9.4	RELPPDQAEYCIARMAPYQGPDAVPGALDYK	Phospho@10=13	809AB_S1_C6R1_MDA-Mb-468_ITMSms2cid	57.057	15.8	0.015	1	104855	HUMAN	Alpha-actinin-4
[4]	P55072	Gln->pyro-Glu	Q	714	-	50	45.5	7.1	1.8e-12	1077.97	2	-4.7	QTNPSAMEVEEDDPVPEIR	Gln->pyro-Glu@1;Oxidation@7	450AB_S2_B6R1_IBL1_ITMSms2cid	46.054	31.4	5.6e-08	1	89322.6	HUMAN	Transitional endoplasmic reticulum ATPase
[4]	P55072	Met-loss+Acetyl	M	1	-	50	45.5	7.1	1.8e-12	845.921	2	-8.9	MASGADSKGDDLSTAILK	Met-loss+Acetyl@1	769AB_S1_B6R2_NCI-H1975_ITMSms2cid	37.605	43.2	1.3e-08	1	89322.6	HUMAN	Transitional endoplasmic reticulum ATPase
[4]	P55072	Oxidation	M	46	-	50	45.5	7.1	1.8e-12	534.261	2	-4.4	MDELQLFR	Oxidation@1	450AB_S2_B6R1_IBL1_ITMSms2cid	77.722	27.2	2.7e-07	1	89322.6	HUMAN	Transitional endoplasmic reticulum ATPase
[4]	P55072	Oxidation	M	219	-	50	45.5	7.1	1.8e-12	501.766	2	-4.3	EMVELPLR	Oxidation@2	769AB_S1_B6R2_NCI-H1975_ITMSms2cid	35.69	21.8	5.7e-06	1	89322.6	HUMAN	Transitional endoplasmic reticulum ATPase
[4]	P55072	Oxidation	M	275	-	50	45.5	7.1	1.8e-12	1136.57	2	-1.7	AVANETGAFFFLINGPEIMSK	Oxidation@19	450AB_S2_B6R1_IBL1_ITMSms2cid	54.868	51.3	2.6e-11	1	89322.6	HUMAN	Transitional endoplasmic reticulum ATPase
[4]	P55072	Oxidation	M	332	-	50	45.5	7.1	1.8e-12	801.964	2	-2	RIVSQLLTLMDGLK	Oxidation@10	450AB_S2_B6R1_IBL1_ITMSms2cid	44.527	22	2.3e-06	1	89322.6	HUMAN	Transitional endoplasmic reticulum ATPase
[4]	P55072	Oxidation	M	344	-	50	45.5	7.1	1.8e-12	1081.58	2	-2	AHVIVMAATNRPNSIDPALR	Oxidation@6	450AB_S2_B6R1_IBL1_ITMSms2cid	34.859	26.7	6.4e-08	1	89322.6	HUMAN	Transitional endoplasmic reticulum ATPase
[4]	P55072	Oxidation	M	550	-	50	45.5	7.1	1.8e-12	976.464	2	-0.37	GPELLTMWFGESEANVR	Oxidation@7	450AB_S2_B6R1_IBL1_ITMSms2cid	52.648	47.5	4.9e-11	1	89322.6	HUMAN	Transitional endoplasmic reticulum ATPase
[4]	P55072	Oxidation	M	608	-	50	45.5	7.1	1.8e-12	856.413	2	-2.9	VINQILTEMDGMSTK	Oxidation@9;Oxidation@12	769AB_S1_D6R1_MRC5_ITMSms2cid	66.005	31.6	5.7e-10	1	89322.6	HUMAN	Transitional endoplasmic reticulum ATPase
[4]	P55072	Oxidation	M	611	-	50	45.5	7.1	1.8e-12	856.413	2	-2.9	VINQILTEMDGMSTK	Oxidation@9;Oxidation@12	769AB_S1_D6R1_MRC5_ITMSms2cid	66.005	31.6	5.7e-10	1	89322.6	HUMAN	Transitional endoplasmic reticulum ATPase
[4]	P55072	Oxidation	M	720	-	50	45.5	7.1	1.8e-12	1077.97	2	-4.7	QTNPSAMEVEEDDPVPEIR	Gln->pyro-Glu@1;Oxidation@7	450AB_S2_B6R1_IBL1_ITMSms2cid	46.054	31.4	5.6e-08	1	89322.6	HUMAN	Transitional endoplasmic reticulum ATPase
[4]	P55072	Oxidation	M	740	-	50	45.5	7.1	1.8e-12	402.848	3	-2.1	RDHFEEAMR	Oxidation@8	769AB_S1_D6R1_MRC5_ITMSms2cid	21.375	15.5	5.3e-05	1	89322.6	HUMAN	Transitional endoplasmic reticulum ATPase
[4]	P55072	Oxidation	M	757	-	50	45.5	7.1	1.8e-12	823.403	2	-0.82	KYEMFAQTLQQSR	Oxidation@4	769AB_S1_D6R1_MRC5_ITMSms2cid	31.291	37.8	1e-08	1	89322.6	HUMAN	Transitional endoplasmic reticulum ATPase
[5]	Q14974	Oxidation	M	181	-	36	35.2	8.15	3.3e-13	731.388	2	-3.2	SNEILTAIIQGMR	Oxidation@12	769AB_S1_B6R2_NCI-H1975_ITMSms2cid	42.772	41.3	1.1e-09	1	97171.1	HUMAN	Importin subunit beta-1
[5]	Q14974	Oxidation	M	533	-	36	35.2	8.15	3.3e-13	686.832	2	-6.7	SSAYESLMEIVK	Oxidation@8	769AB_S1_B6R2_NCI-H1975_ITMSms2cid	39.929	41.7	1.1e-07	1	97171.1	HUMAN	Importin subunit beta-1
[5]	Q14974	Oxidation	M	555	-	36	35.2	8.15	3.3e-13	489.766	2	-5	TTLVIMER	Oxidation@6	450AB_S2_B6R1_IBL1_ITMSms2cid	34.464	29.4	9.1e-07	1	97171.1	HUMAN	Importin subunit beta-1
[5]	Q14974	Oxidation	M	564	-	36	35.2	8.15	3.3e-13	1008.49	2	-3.2	LQQVLQMESHIQSTSDR	Oxidation@7	769AB_S1_B6R2_NCI-H1975_ITMSms2cid	30.824	48.8	1.6e-11	1	97171.1	HUMAN	Importin subunit beta-1
[5]	Q14974	Oxidation	M	608	-	36	35.2	8.15	3.3e-13	567.558	4	-4.2	KVQHQDALQISDVVMASLLR	Oxidation@15	769AB_S1_B6R2_NCI-H1975_ITMSms2cid	41.055	25.7	1.8e-05	1	97171.1	HUMAN	Importin subunit beta-1
[5]	Q14974	Oxidation	M	647	-	36	35.2	8.15	3.3e-13	815.437	2	-2.6	YMEAFKPFLGIGLK	Oxidation@2	450AB_S2_B6R1_IBL1_ITMSms2cid	47.853	31.9	2.8e-08	1	97171.1	HUMAN	Importin subunit beta-1
[5]	Q14974	Oxidation	M	754	-	36	35.2	8.15	3.3e-13	1259.61	3	-1.4	YLEVVLNTLQQASQAQVDKSDYDMVDYLNELR	Oxidation@24	450AB_S2_B6R1_IBL1_ITMSms2cid	54.198	31.9	2.1e-08	1	97171.1	HUMAN	Importin subunit beta-1
[5]	Q14974	Oxidation	M	788	-	36	35.2	8.15	3.3e-13	925.443	2	-4.2	GDQENVHPDVMLVQPR	Oxidation@11	769AB_S1_D6R1_MRC5_ITMSms2cid	32.418	38.5	3e-09	1	97171.1	HUMAN	Importin subunit beta-1
[5]	Q14974	Oxidation	M	842	-	36	35.2	8.15	3.3e-13	940.508	2	1.5	LVEARPMIHELLTEGR	Oxidation@7	769AB_S1_B6R2_NCI-H1975_ITMSms2cid	34.708	23.3	1.7e-07	1	97171.1	HUMAN	Importin subunit beta-1
[6]	P33991	Gln->pyro-Glu	Q	114	-	36	43.2	8.19	5.4e-14	541.781	2	-4.6	QRPDLGSAQK	Gln->pyro-Glu@1	769AB_S1_B6R2_NCI-H1975_ITMSms2cid	27.252	31.9	1.5e-07	1	96558.8	HUMAN	DNA replication licensing factor MCM4
[6]	P33991	Oxidation	M	194	-	36	43.2	8.19	5.4e-14	1418.71	2	0.56	FIDPLAKEEENVGIDITEPLYMQR	Oxidation@22	450AB_S2_B6R1_IBL1_ITMSms2cid	51.419	24.6	2.3e-07	1	96558.8	HUMAN	DNA replication licensing factor MCM4
[6]	P33991	Oxidation	M	288	-	36	43.2	8.19	5.4e-14	1079.07	2	1.7	NLNPEDIDQLITISGMVIR	Oxidation@16	450AB_1_A7R1_Daudi_ITMSms2cid	49.925	46.7	9.6e-10	1	96558.8	HUMAN	DNA replication licensing factor MCM4
[6]	P33991	Oxidation	M	361	-	36	43.2	8.19	5.4e-14	1040.17	3	-3.4	LQESPEDMPAGQTPHTVILFAHNDLVDK	Oxidation@8	450AB_S2_B6R1_IBL1_ITMSms2cid	43.013	24.7	3.4e-06	1	96558.8	HUMAN	DNA replication licensing factor MCM4
[6]	P33991	Oxidation	M	548	-	36	43.2	8.19	5.4e-14	949.466	2	-4.2	GSSAVGLTAYVMKDPETR	Oxidation@12	450AB_S2_B6R1_IBL1_ITMSms2cid	38.006	28.8	4.7e-08	1	96558.8	HUMAN	DNA replication licensing factor MCM4
[6]	P33991	Oxidation	M	591	-	36	43.2	8.19	5.4e-14	914.976	2	-1.9	SVLHEVMEQQTLSIAK	Oxidation@7	769AB_S1_B6R2_NCI-H1975_ITMSms2cid	34.803	41	4e-11	1	96558.8	HUMAN	DNA replication licensing factor MCM4
[6]	P33991	Oxidation	M	684	-	36	43.2	8.19	5.4e-14	1579.78	2	-8.2	LAHHLVALYYQSEEQAEEELLDMAVLK	Oxidation@23	450AB_S2_B6R1_IBL1_ITMSms2cid	51.364	25.6	3e-08	1	96558.8	HUMAN	DNA replication licensing factor MCM4
[6]	P33991	Oxidation	M	699	-	36	43.2	8.19	5.4e-14	777.371	2	-4.1	DYIAYAHSTIMPR	Oxidation@11	769AB_S1_B6R2_NCI-H1975_ITMSms2cid	34.983	45.6	9.5e-12	1	96558.8	HUMAN	DNA replication licensing factor MCM4
[6]	P33991	Oxidation	M	717	-	36	43.2	8.19	5.4e-14	970.967	2	-0.24	LSEEASQALIEAYVDMR	Oxidation@16	450AB_1_A7R1_Daudi_ITMSms2cid	44.878	44.4	3.5e-11	1	96558.8	HUMAN	DNA replication licensing factor MCM4
[6]	P33991	Oxidation	M	726	-	36	43.2	8.19	5.4e-14	448.718	2	-1.5	GMVSAYPR	Oxidation@2	450AB_S2_B6R1_IBL1_ITMSms2cid	29.074	24.5	1.1e-05	1	96558.8	HUMAN	DNA replication licensing factor MCM4
[6]	P33991	Oxidation	M	790	-	36	43.2	8.19	5.4e-14	919.979	2	-1	TGIVDISILTTGMSATSR	Oxidation@13	450AB_S2_B6R1_IBL1_ITMSms2cid	48.949	47.3	2.1e-10	1	96558.8	HUMAN	DNA replication licensing factor MCM4
[7]	Q01813	Oxidation	M	39	-	32	31.1	8.47	4e-14	902.454	2	-0.58	AIGVLTSGGDAQGMNAAVR	Oxidation@14	769AB_S2_E8R1_HMEC_ITMSms2cid	33.637	56.6	2.6e-12	2	85596.9	HUMAN	ATP-dependent 6-phosphofructokinase, platelet type
[7]	Q01813	Oxidation	M	49	-	32	31.1	8.47	4e-14	427.725	2	-0.85	MGIYVGAK	Oxidation@1	769AB_S1_D6R1_MRC5_ITMSms2cid	28.002	18.4	7.4e-05	2	85596.9	HUMAN	ATP-dependent 6-phosphofructokinase, platelet type
[7]	Q01813	Oxidation	M	202	-	32	31.1	8.47	4e-14	964.498	2	-1.2	IIEVVDAIMTTAQSHQR	Oxidation@9	769AB_S1_D6R1_MRC5_ITMSms2cid	37.604	48.3	1e-10	1	85596.9	HUMAN	ATP-dependent 6-phosphofructokinase, platelet type
[7]	Q01813	Oxidation	M	217	-	32	31.1	8.47	4e-14	534.279	2	-3.6	TFVLEVMGR	Oxidation@7	769AB_S1_D6R1_MRC5_ITMSms2cid	36.147	29.6	3e-07	3	85596.9	HUMAN	ATP-dependent 6-phosphofructokinase, platelet type
[7]	Q01813	Oxidation	M	443	-	32	31.1	8.47	4e-14	732.348	2	0.54	MLAIYDGFDGFAK	Oxidation@1	769AB_S2_E8R1_HMEC_ITMSms2cid	42.4	28.2	6.2e-07	1	85596.9	HUMAN	ATP-dependent 6-phosphofructokinase, platelet type
[7]	Q01813	Oxidation	M	495	-	32	31.1	8.47	4e-14	635.31	2	-1.4	YLEEIATQMR	Oxidation@9	769AB_S1_D6R1_MRC5_ITMSms2cid	43.361	31.1	4.3e-08	1	85596.9	HUMAN	ATP-dependent 6-phosphofructokinase, platelet type
[7]	Q01813	Oxidation	M	672	-	32	31.1	8.47	4e-14	652.323	3	-0.69	KNVLGHMQQGGAPSPFDR	Oxidation@7	769AB_S2_E8R1_HMEC_ITMSms2cid	28.953	30.1	2e-07	1	85596.9	HUMAN	ATP-dependent 6-phosphofructokinase, platelet type
[7]	Q01813	Oxidation	M	694	-	32	31.1	8.47	4e-14	483.24	2	-3.5	AMEWITAK	Oxidation@2	769AB_S1_D6R1_MRC5_ITMSms2cid	31.629	20.5	3.5e-06	1	85596.9	HUMAN	ATP-dependent 6-phosphofructokinase, platelet type
[7-1]	P17858	Oxidation	M	30	-	27	34.4	7.78	2.6e-12	902.454	2	-0.58	AIGVLTSGGDAQGMNAAVR	Oxidation@14	769AB_S2_E8R1_HMEC_ITMSms2cid	33.637	56.6	2.6e-12	2	85019.2	HUMAN	ATP-dependent 6-phosphofructokinase, liver type
[7-1]	P17858	Oxidation	M	40	-	27	34.4	7.78	2.6e-12	427.725	2	-0.85	MGIYVGAK	Oxidation@1	769AB_S1_D6R1_MRC5_ITMSms2cid	28.002	18.4	7.4e-05	2	85019.2	HUMAN	ATP-dependent 6-phosphofructokinase, liver type
[7-1]	P17858	Oxidation	M	186	-	27	34.4	7.78	2.6e-12	965.485	2	-3.5	IMEVIDAITTTAQSHQR	Oxidation@2	769AB_S2_E8R1_HMEC_ITMSms2cid	35.945	44.7	1.7e-10	1	85019.2	HUMAN	ATP-dependent 6-phosphofructokinase, liver type
[7-1]	P17858	Oxidation	M	208	-	27	34.4	7.78	2.6e-12	534.279	2	-3.6	TFVLEVMGR	Oxidation@7	769AB_S1_D6R1_MRC5_ITMSms2cid	36.147	29.6	3e-07	3	85019.2	HUMAN	ATP-dependent 6-phosphofructokinase, liver type
[7-1]	P17858	Oxidation	M	414	-	27	34.4	7.78	2.6e-12	1080.57	2	1.2	SNFSLAILNVGAPAAGMNAAVR	Oxidation@17	769AB_S2_E8R1_HMEC_ITMSms2cid	43.205	45.1	2e-09	1	85019.2	HUMAN	ATP-dependent 6-phosphofructokinase, liver type
[7-1]	P17858	Oxidation	M	683	-	27	34.4	7.78	2.6e-12	497.256	2	-2.7	AMLWLSEK	Oxidation@2	769AB_S2_E8R1_HMEC_ITMSms2cid	35.908	24.1	1.2e-05	1	85019.2	HUMAN	ATP-dependent 6-phosphofructokinase, liver type
[7-1]	P17858	Oxidation	M	758	-	27	34.4	7.78	2.6e-12	889.936	2	-5.4	ISMAAYVSGELEHVTR	Oxidation@3	769AB_S2_E8R1_HMEC_ITMSms2cid	36.412	31.8	1.7e-07	1	85019.2	HUMAN	ATP-dependent 6-phosphofructokinase, liver type
[7-2]	P08237	Oxidation	M	30	-	14	20.8	5.21	2.5e-10	909.46	2	-2.7	AIAVLTSGGDAQGMNAAVR	Oxidation@14	450AB_1_A7R1_Daudi_ITMSms2cid	32.305	43.2	3.4e-10	1	85183.3	HUMAN	ATP-dependent 6-phosphofructokinase, muscle type
[7-2]	P08237	Oxidation	M	208	-	14	20.8	5.21	2.5e-10	534.279	2	-3.6	TFVLEVMGR	Oxidation@7	769AB_S1_D6R1_MRC5_ITMSms2cid	36.147	29.6	3e-07	3	85183.3	HUMAN	ATP-dependent 6-phosphofructokinase, muscle type
[7-2]	P08237	Oxidation	M	406	-	14	20.8	5.21	2.5e-10	734.023	3	-3.1	SGSHTVAVMNVGAPAAGMNAAVR	Oxidation@9;Oxidation@18	450AB_1_A7R1_Daudi_ITMSms2cid	26.947	33.6	8.4e-08	1	85183.3	HUMAN	ATP-dependent 6-phosphofructokinase, muscle type
[7-2]	P08237	Oxidation	M	415	-	14	20.8	5.21	2.5e-10	734.023	3	-3.1	SGSHTVAVMNVGAPAAGMNAAVR	Oxidation@9;Oxidation@18	450AB_1_A7R1_Daudi_ITMSms2cid	26.947	33.6	8.4e-08	1	85183.3	HUMAN	ATP-dependent 6-phosphofructokinase, muscle type
[7-2]	P08237	Oxidation	M	662	-	14	20.8	5.21	2.5e-10	662.326	3	-0.57	KNVLGHMQQGGSPTPFDR	Oxidation@7	450AB_1_A7R1_Daudi_ITMSms2cid	26.038	29.4	1.2e-07	1	85183.3	HUMAN	ATP-dependent 6-phosphofructokinase, muscle type
[8]	P33993	Gln->pyro-Glu	Q	287	-	43	49	6.14	1.9e-11	913.474	2	-2.4	QVVQGLLSETYLEAHR	Gln->pyro-Glu@1	769AB_S1_B6R2_NCI-H1975_ITMSms2cid	45.134	48.2	2.2e-11	1	81308.7	HUMAN	DNA replication licensing factor MCM7
[8]	P33993	Met-loss+Acetyl	M	1	-	43	49	6.14	1.9e-11	546.799	2	-3	MALKDYALEK	Met-loss+Acetyl@1	769AB_S1_B6R2_NCI-H1975_ITMSms2cid	35.707	27.7	3.1e-06	1	81308.7	HUMAN	DNA replication licensing factor MCM7
[8]	P33993	Oxidation	M	131	-	43	49	6.14	1.9e-11	725.34	2	-4.7	SPQNQYPAELMR	Oxidation@11	769AB_S1_B6R2_NCI-H1975_ITMSms2cid	31.454	29.9	2.1e-08	1	81308.7	HUMAN	DNA replication licensing factor MCM7
[8]	P33993	Oxidation	M	237	-	43	49	6.14	1.9e-11	861.912	2	-3.6	MQEHSDQVPVGNIPR	Oxidation@1	809AB_S1_C6R1_MDA-Mb-468_ITMSms2cid	29.199	45.6	1.9e-11	1	81308.7	HUMAN	DNA replication licensing factor MCM7
[8]	P33993	Oxidation	M	462	-	43	49	6.14	1.9e-11	907.965	2	-5	TAIHEVMEQQTISIAK	Oxidation@7	450AB_1_A7R1_Daudi_ITMSms2cid	29.879	43.1	1.4e-10	1	81308.7	HUMAN	DNA replication licensing factor MCM7
[8]	P33993	Oxidation	M	556	-	43	49	6.14	1.9e-11	716.84	2	-3.3	QPPSQFEPLDMK	Oxidation@11	450AB_S2_B6R1_IBL1_ITMSms2cid	37.852	25	1.4e-06	1	81308.7	HUMAN	DNA replication licensing factor MCM7
[8]	P33993	Oxidation	M	572	-	43	49	6.14	1.9e-11	858.411	3	-3.2	EKQPMVPESLADYITAAYVEMR	Oxidation@5;Oxidation@21	450AB_1_A7R1_Daudi_ITMSms2cid	46.104	28.3	1.4e-06	1	81308.7	HUMAN	DNA replication licensing factor MCM7
[8]	P33993	Oxidation	M	588	-	43	49	6.14	1.9e-11	858.411	3	-3.2	EKQPMVPESLADYITAAYVEMR	Oxidation@5;Oxidation@21	450AB_1_A7R1_Daudi_ITMSms2cid	46.104	28.3	1.4e-06	1	81308.7	HUMAN	DNA replication licensing factor MCM7
[8]	P33993	Oxidation	M	621	-	43	49	6.14	1.9e-11	881.437	2	-1.6	MVDVVEKEDVNEAIR	Oxidation@1	769AB_S1_B6R2_NCI-H1975_ITMSms2cid	32.308	45	2.1e-10	1	81308.7	HUMAN	DNA replication licensing factor MCM7
[8]	P33993	Phospho	T	262	6	43	49	6.14	1.9e-11	772.118	4	-8.5	MQEHSDQVPVGNIPRSITVLVEGENTR	Phospho@26=6	809AB_S1_C6R1_MDA-Mb-468_ITMSms2cid	63.826	18.7	0.0036	1	81308.7	HUMAN	DNA replication licensing factor MCM7
[8]	P33993	Phospho	Y	495	14	43	49	6.14	1.9e-11	625.556	4	-11	YNPRRSLEQNIQLPAALLSR	Phospho@1=14;Phospho@6=22	450AB_1_A7R1_Daudi_ITMSms2cid	28.424	15.1	0.021	1	81308.7	HUMAN	DNA replication licensing factor MCM7
[8]	P33993	Phospho	S	500	22	43	49	6.14	1.9e-11	625.556	4	-11	YNPRRSLEQNIQLPAALLSR	Phospho@1=14;Phospho@6=22	450AB_1_A7R1_Daudi_ITMSms2cid	28.424	15.1	0.021	1	81308.7	HUMAN	DNA replication licensing factor MCM7
[9]	P04264	Met-loss+Acetyl	M	1	-	35	49.7	8.56	2.9e-16	455.23	2	-1.7	MSRQFSSR	Met-loss+Acetyl@1	450AB_1_A7R1_Daudi_ITMSms2cid	20.381	16.9	5.8e-05	1	66039.2	HUMAN	Keratin, type II cytoskeletal 1
[9]	P04264	Oxidation	M	259	-	35	49.7	8.56	2.9e-16	673.3	3	1.1	LDSELKNMQDMVEDYR	Oxidation@8;Oxidation@11	769AB_S2_E8R1_HMEC_ITMSms2cid	31.612	21.2	8.7e-06	1	66039.2	HUMAN	Keratin, type II cytoskeletal 1
[9]	P04264	Oxidation	M	262	-	35	49.7	8.56	2.9e-16	673.3	3	1.1	LDSELKNMQDMVEDYR	Oxidation@8;Oxidation@11	769AB_S2_E8R1_HMEC_ITMSms2cid	31.612	21.2	8.7e-06	1	66039.2	HUMAN	Keratin, type II cytoskeletal 1
[9]	P04264	Oxidation	M	469	-	35	49.7	8.56	2.9e-16	579.259	2	-2.8	DYQELMNTK	Oxidation@6	769AB_S1_D6R1_MRC5_ITMSms2cid	28.296	25.6	1.7e-06	1	66039.2	HUMAN	Keratin, type II cytoskeletal 1
[9-1]	P35908	Oxidation	M	216	-	24	49.5	6.26	2e-12	850.421	4	-7.2	WELLQQMNVGTRPINLEPIFQGYIDSLK	Oxidation@7;Phospho@11=25	450AB_1_A7R1_Daudi_ITMSms2cid	41.82	19.9	0.0074	1	65433.4	HUMAN	Keratin, type II cytoskeletal 2 epidermal
[9-1]	P35908	Oxidation	M	257	-	24	49.5	6.26	2e-12	758.018	3	-0.15	TSQNSELNNMQDLVEDYKK	Oxidation@10	769AB_S1_D6R1_MRC5_ITMSms2cid	32.031	15.7	0.00037	1	65433.4	HUMAN	Keratin, type II cytoskeletal 2 epidermal
[9-1]	P35908	Phospho	T	220	25	24	49.5	6.26	2e-12	850.421	4	-7.2	WELLQQMNVGTRPINLEPIFQGYIDSLK	Oxidation@7;Phospho@11=25	450AB_1_A7R1_Daudi_ITMSms2cid	41.82	19.9	0.0074	1	65433.4	HUMAN	Keratin, type II cytoskeletal 2 epidermal
[10]	P14625	Oxidation	M	154	-	39	41.7	6.02	2.3e-11	765.389	2	-1.9	NLLHVTDTGVGMTR	Oxidation@12	809AB_S1_C6R1_MDA-Mb-468_ITMSms2cid	31.621	36.7	7e-10	1	92469.6	HUMAN	Endoplasmin
[10]	P14625	Oxidation	M	425	-	39	41.7	6.02	2.3e-11	595.275	3	-2.1	RVFITDDFHDMMPK	Oxidation@11;Oxidation@12	769AB_S2_E8R1_HMEC_ITMSms2cid	31.977	17.3	4e-05	1	92469.6	HUMAN	Endoplasmin
[10]	P14625	Oxidation	M	426	-	39	41.7	6.02	2.3e-11	595.275	3	-2.1	RVFITDDFHDMMPK	Oxidation@11;Oxidation@12	769AB_S2_E8R1_HMEC_ITMSms2cid	31.977	17.3	4e-05	1	92469.6	HUMAN	Endoplasmin
[10]	P14625	Oxidation	M	541	-	39	41.7	6.02	2.3e-11	524.248	2	-3.9	IYFMAGSSR	Oxidation@4	809AB_S1_C6R1_MDA-Mb-468_ITMSms2cid	30.83	28.1	1.6e-07	1	92469.6	HUMAN	Endoplasmin
[10]	P14625	Oxidation	M	622	-	39	41.7	6.02	2.3e-11	939.973	2	4.3	EAVEKEFEPLLNWMK	Oxidation@14	769AB_S2_E8R1_HMEC_ITMSms2cid	41.822	35.6	2.6e-09	1	92469.6	HUMAN	Endoplasmin
[10]	P14625	Phospho	T	720	9	39	41.7	6.02	2.3e-11	1028	4	-5.4	EDEDDKTVLDLAVVLFETATLRSGYLLPDTKAYGDR	Phospho@18=9	809AB_S1_C6R1_MDA-Mb-468_ITMSms2cid	93.582	15.6	0.037	1	92469.6	HUMAN	Endoplasmin
[11]	P11142	Oxidation	M	61	-	34	46.3	6.83	2.6e-12	833.398	2	-0.7	NQVAMNPTNTVFDAK	Oxidation@5	450AB_1_A7R1_Daudi_ITMSms2cid	32.064	35.6	1e-10	1	70898.7	HUMAN	Heat shock cognate 71 kDa protein
[11]	P11142	Oxidation	M	87	-	34	46.3	6.83	2.6e-12	713.834	2	-1.4	RFDDAVVQSDMK	Oxidation@11	769AB_S2_E8R1_HMEC_ITMSms2cid	27.841	37.3	2.6e-09	1	70898.7	HUMAN	Heat shock cognate 71 kDa protein
[11]	P11142	Oxidation	M	93	-	34	46.3	6.83	2.6e-12	557.279	3	-2.6	HWPFMVVNDAGRPK	Oxidation@5	769AB_S2_E8R1_HMEC_ITMSms2cid	34.107	24.3	8.1e-06	1	70898.7	HUMAN	Heat shock cognate 71 kDa protein
[11]	P11142	Oxidation	M	122	-	34	46.3	6.83	2.6e-12	816.889	2	-7.6	SFYPEEVSSMVLTK	Oxidation@10	769AB_S2_E8R1_HMEC_ITMSms2cid	38.778	35.7	3.2e-08	1	70898.7	HUMAN	Heat shock cognate 71 kDa protein
[11]	P11142	Oxidation	M	127	-	34	46.3	6.83	2.6e-12	634.83	2	-3	MKEIAEAYLGK	Oxidation@1	769AB_S2_E8R1_HMEC_ITMSms2cid	30.601	39.9	8e-08	1	70898.7	HUMAN	Heat shock cognate 71 kDa protein
[11]	P11142	Oxidation	M	237	-	34	46.3	6.83	2.6e-12	626.311	2	-3.3	MVNHFIAEFK	Oxidation@1	769AB_S2_E8R1_HMEC_ITMSms2cid	34.173	25.9	4.9e-07	1	70898.7	HUMAN	Heat shock cognate 71 kDa protein
[11]	P11142	Oxidation	M	549	-	34	46.3	6.83	2.6e-12	660.298	2	-3.9	NSLESYAFNMK	Oxidation@10	769AB_S2_E8R1_HMEC_ITMSms2cid	35.3	39.4	2.1e-09	1	70898.7	HUMAN	Heat shock cognate 71 kDa protein
[11-1]	P11021	Oxidation	M	148	-	26	41.9	6.21	2.1e-10	776.9	2	-0.39	TFAPEEISAMVLTK	Oxidation@10	769AB_S2_E8R1_HMEC_ITMSms2cid	40.118	37	9.2e-10	1	72333.5	HUMAN	Endoplasmic reticulum chaperone BiP
[11-1]	P11021	Oxidation	M	153	-	26	41.9	6.21	2.1e-10	628.812	2	-2.7	MKETAEAYLGK	Oxidation@1	769AB_S2_E8R1_HMEC_ITMSms2cid	27.739	28	1.8e-07	1	72333.5	HUMAN	Endoplasmic reticulum chaperone BiP
[11-1]	P11021	Oxidation	M	196	-	26	41.9	6.21	2.1e-10	617.315	2	-2.3	DAGTIAGLNVMR	Oxidation@11	769AB_S2_E8R1_HMEC_ITMSms2cid	34.375	34.1	2e-07	1	72333.5	HUMAN	Endoplasmic reticulum chaperone BiP
[11-1]	P11021	Phospho	T	184	12	26	41.9	6.21	2.1e-10	1198.93	3	0.24	VTHAVVTVPAYFNDAQRQATKDAGTIAGLNVMR	Phospho@20=12	809AB_S1_C6R1_MDA-Mb-468_ITMSms2cid	33.413	15.1	0.00017	1	72333.5	HUMAN	Endoplasmic reticulum chaperone BiP
[11-2]	P0DMV8	Oxidation	M	87	-	16	33.5	6.74	1.5e-11	683.835	2	-3.7	KFGDPVVQSDMK	Oxidation@11	769AB_S2_E8R1_HMEC_ITMSms2cid	27.584	16.6	0.00019	2	70052.8	HUMAN	Heat shock 70 kDa protein 1A
[11-2]	P0DMV8	Oxidation	M	122	-	16	33.5	6.74	1.5e-11	815.901	2	-5	AFYPEEISSMVLTK	Oxidation@10	769AB_S2_E8R1_HMEC_ITMSms2cid	40.415	38.9	7.5e-10	2	70052.8	HUMAN	Heat shock 70 kDa protein 1A
[11-2]	P0DMV8	Oxidation	M	381	-	16	33.5	6.74	1.5e-11	774.053	3	-1.7	SINPDEAVAYGAAVQAAILMGDK	Oxidation@20	769AB_S2_E8R1_HMEC_ITMSms2cid	46.527	18.8	0.00011	2	70052.8	HUMAN	Heat shock 70 kDa protein 1A
[11-3]	P0DMV9	Oxidation	M	87	-	16	33.5	6.74	1.5e-11	683.835	2	-3.7	KFGDPVVQSDMK	Oxidation@11	769AB_S2_E8R1_HMEC_ITMSms2cid	27.584	16.6	0.00019	2	70052.8	HUMAN	Heat shock 70 kDa protein 1B
[11-3]	P0DMV9	Oxidation	M	122	-	16	33.5	6.74	1.5e-11	815.901	2	-5	AFYPEEISSMVLTK	Oxidation@10	769AB_S2_E8R1_HMEC_ITMSms2cid	40.415	38.9	7.5e-10	2	70052.8	HUMAN	Heat shock 70 kDa protein 1B
[11-3]	P0DMV9	Oxidation	M	381	-	16	33.5	6.74	1.5e-11	774.053	3	-1.7	SINPDEAVAYGAAVQAAILMGDK	Oxidation@20	769AB_S2_E8R1_HMEC_ITMSms2cid	46.527	18.8	0.00011	2	70052.8	HUMAN	Heat shock 70 kDa protein 1B
[12]	Q92945	Gln->pyro-Glu	Q	655	-	34	55.7	6.43	1.2e-12	1468.17	2	1.8	QAQVATGGGPGAPPGSQPDYSAAWAEYYR	Gln->pyro-Glu@1	450AB_1_A7R1_Daudi_ITMSms2cid	45.671	30.6	1.2e-09	1	73115.9	HUMAN	Far upstream element-binding protein 2
[12]	Q92945	Met-loss+Acetyl	M	1	-	34	55.7	6.43	1.2e-12	1082.83	3	-0.45	MSDYSTGGPPPGPPPPAGGGGGAGGAGGGPPPGPPGAGDR	Met-loss+Acetyl@1	809AB_S1_C6R1_MDA-Mb-468_ITMSms2cid	34.559	37.6	2.5e-10	1	73115.9	HUMAN	Far upstream element-binding protein 2
[12]	Q92945	Oxidation	M	145	44	34	55.7	6.43	1.2e-12	747.37	3	-4.5	TSMTEEYRVPDGMVGLIIGR	Oxidation@3=44	450AB_1_A7R1_Daudi_ITMSms2cid	43.764	39.1	6.8e-09	1	73115.9	HUMAN	Far upstream element-binding protein 2
[12]	Q92945	Oxidation	M	155	-	34	55.7	6.43	1.2e-12	621.847	2	-0.44	VPDGMVGLIIGR	Oxidation@5	450AB_1_A7R1_Daudi_ITMSms2cid	37.565	28.9	1.5e-07	1	73115.9	HUMAN	Far upstream element-binding protein 2
[12]	Q92945	Oxidation	M	206	-	34	55.7	6.43	1.2e-12	655.824	2	-3	AKMMLDDIVSR	Oxidation@3;Oxidation@4	450AB_1_A7R1_Daudi_ITMSms2cid	27.297	28.7	7.1e-08	1	73115.9	HUMAN	Far upstream element-binding protein 2
[12]	Q92945	Oxidation	M	207	-	34	55.7	6.43	1.2e-12	655.824	2	-3	AKMMLDDIVSR	Oxidation@3;Oxidation@4	450AB_1_A7R1_Daudi_ITMSms2cid	27.297	28.7	7.1e-08	1	73115.9	HUMAN	Far upstream element-binding protein 2
[12]	Q92945	Oxidation	M	267	-	34	55.7	6.43	1.2e-12	1029.53	2	-3.9	MILIQDGSQNTNVDKPLR	Oxidation@1	450AB_S2_B6R1_IBL1_ITMSms2cid	36.494	40.8	2.4e-09	1	73115.9	HUMAN	Far upstream element-binding protein 2
[12]	Q92945	Oxidation	M	373	-	34	55.7	6.43	1.2e-12	561.789	2	-1.2	IAHIMGPPDR	Oxidation@5	809AB_S1_C6R1_MDA-Mb-468_ITMSms2cid	25.698	32.6	4.8e-08	1	73115.9	HUMAN	Far upstream element-binding protein 2
[12]	Q92945	Oxidation	M	406	-	34	55.7	6.43	1.2e-12	744.355	2	-1.6	SGPPGPPGGPGMPPGGR	Oxidation@12	809AB_S1_C6R1_MDA-Mb-468_ITMSms2cid	27.328	35.8	4.5e-09	1	73115.9	HUMAN	Far upstream element-binding protein 2
[13]	P11216	Gln->pyro-Glu	Q	741	-	31	42.6	6.84	2.9e-12	747.364	2	-3.9	QAVDQISSGFFSPK	Gln->pyro-Glu@1	769AB_S1_B6R2_NCI-H1975_ITMSms2cid	44.582	28.9	5.7e-07	1	96696.8	HUMAN	Glycogen phosphorylase, brain form
[13]	P11216	Met-loss+Acetyl	M	1	-	31	42.6	6.84	2.9e-12	515.772	2	-4.7	MAKPLTDSEK	Met-loss+Acetyl@1	769AB_S1_B6R2_NCI-H1975_ITMSms2cid	25.962	23.7	1.1e-05	1	96696.8	HUMAN	Glycogen phosphorylase, brain form
[13]	P11216	Oxidation	M	198	-	31	42.6	6.84	2.9e-12	584.625	3	-5.4	ARPEYMLPVHFYGR	Oxidation@6	769AB_S1_B6R2_NCI-H1975_ITMSms2cid	36.058	31.1	4.6e-08	1	96696.8	HUMAN	Glycogen phosphorylase, brain form
[13]	P11216	Oxidation	M	225	-	31	42.6	6.84	2.9e-12	1155.07	2	-5.2	WLDTQVVLAMPYDTPVPGYK	Oxidation@10	769AB_S1_B6R2_NCI-H1975_ITMSms2cid	43.877	49	1e-11	1	96696.8	HUMAN	Glycogen phosphorylase, brain form
[13]	P11216	Oxidation	M	351	-	31	42.6	6.84	2.9e-12	1067.57	2	-1.1	VAIQLNDTHPALSIPELMR	Oxidation@18	769AB_S1_B6R2_NCI-H1975_ITMSms2cid	40.66	40.6	1.7e-10	1	96696.8	HUMAN	Glycogen phosphorylase, brain form
[13]	P11216	Oxidation	M	563	-	31	42.6	6.84	2.9e-12	695.342	2	-5.2	INPSSMFDVHVK	Oxidation@6	769AB_S1_B6R2_NCI-H1975_ITMSms2cid	32.695	31.1	1.4e-07	1	96696.8	HUMAN	Glycogen phosphorylase, brain form
[13]	P11216	Oxidation	M	680	-	31	42.6	6.84	2.9e-12	1232.1	2	-2.9	VIPAADLSQQISTAGTEASGTGNMK	Oxidation@24	769AB_S1_B6R2_NCI-H1975_ITMSms2cid	37.865	52.2	2.9e-12	1	96696.8	HUMAN	Glycogen phosphorylase, brain form
[13-1]	P06737	Met-loss+Acetyl	M	1	-	31	37.2	6.3	5e-12	536.285	2	-5	MAKPLTDQEK	Met-loss+Acetyl@1	769AB_S1_B6R2_NCI-H1975_ITMSms2cid	26.103	23.9	7.4e-07	1	97149.4	HUMAN	Glycogen phosphorylase, liver form
[13-1]	P06737	Oxidation	M	198	-	31	37.2	6.3	5e-12	575.29	3	-3.4	SRPEFMLPVHFYGK	Oxidation@6	769AB_S1_B6R2_NCI-H1975_ITMSms2cid	38.036	31.4	6e-07	1	97149.4	HUMAN	Glycogen phosphorylase, liver form
[13-1]	P06737	Oxidation	M	429	-	31	37.2	6.3	5e-12	484.246	3	-5	RMSLIEEEGSKR	Oxidation@2	769AB_S1_B6R2_NCI-H1975_ITMSms2cid	25.244	18.3	5e-05	1	97149.4	HUMAN	Glycogen phosphorylase, liver form
[13-1]	P06737	Oxidation	M	563	-	31	37.2	6.3	5e-12	690.84	2	-8	INPSSMFDVQVK	Oxidation@6	769AB_S1_B6R2_NCI-H1975_ITMSms2cid	35.243	28.7	7e-06	1	97149.4	HUMAN	Glycogen phosphorylase, liver form
[13-1]	P06737	Oxidation	M	636	-	31	37.2	6.3	5e-12	937.98	2	-0.15	LITSVADVVNNDPMVGSK	Oxidation@14	769AB_S1_B6R2_NCI-H1975_ITMSms2cid	37.95	47.6	5e-12	1	97149.4	HUMAN	Glycogen phosphorylase, liver form
[13-1]	P06737	Oxidation	M	680	-	31	37.2	6.3	5e-12	1247.6	2	-2.3	VIPATDLSEQISTAGTEASGTGNMK	Oxidation@24	769AB_S1_B6R2_NCI-H1975_ITMSms2cid	38.165	43.9	4.9e-11	1	97149.4	HUMAN	Glycogen phosphorylase, liver form
[13-1]	P06737	Oxidation	M	765	-	31	37.2	6.3	5e-12	726.848	2	-4.1	DIINMLFYHDR	Oxidation@5	769AB_S1_B6R2_NCI-H1975_ITMSms2cid	42.993	32.6	1.1e-07	1	97149.4	HUMAN	Glycogen phosphorylase, liver form
[14]	Q04446	Gln->pyro-Glu	Q	566	-	33	40.3	6.09	7.1e-11	678.332	2	-1.1	QFHLTDDDLLR	Gln->pyro-Glu@1	769AB_S2_E8R1_HMEC_ITMSms2cid	42.185	36.9	9.4e-07	1	80474.6	HUMAN	1,4-alpha-glucan-branching enzyme
[14]	Q04446	Met-loss+Acetyl	M	1	-	33	40.3	6.09	7.1e-11	1526.75	2	-2.7	MAAPMTPAARPEDYEAALNAALADVPELAR	Met-loss+Acetyl@1;Oxidation@5	769AB_S2_E8R1_HMEC_ITMSms2cid	48.461	22.2	2e-07	1	80474.6	HUMAN	1,4-alpha-glucan-branching enzyme
[14]	Q04446	Oxidation	M	5	-	33	40.3	6.09	7.1e-11	1526.75	2	-2.7	MAAPMTPAARPEDYEAALNAALADVPELAR	Met-loss+Acetyl@1;Oxidation@5	769AB_S2_E8R1_HMEC_ITMSms2cid	48.461	22.2	2e-07	1	80474.6	HUMAN	1,4-alpha-glucan-branching enzyme
[14]	Q04446	Oxidation	M	437	-	33	40.3	6.09	7.1e-11	437.739	2	-0.39	LAMAIPDK	Oxidation@3	769AB_S2_E8R1_HMEC_ITMSms2cid	26.627	28.9	2.6e-06	1	80474.6	HUMAN	1,4-alpha-glucan-branching enzyme
[14]	Q04446	Oxidation	M	457	-	33	40.3	6.09	7.1e-11	1181.54	2	-0.12	EFKDEDWNMGDIVYTLTNR	Oxidation@9	769AB_S2_E8R1_HMEC_ITMSms2cid	41.637	32	2e-09	1	80474.6	HUMAN	1,4-alpha-glucan-branching enzyme
[14]	Q04446	Oxidation	M	587	-	33	40.3	6.09	7.1e-11	729.331	2	-2.7	FLNNFDRDMNR	Oxidation@9	769AB_S2_E8R1_HMEC_ITMSms2cid	31.01	21.8	6.5e-06	1	80474.6	HUMAN	1,4-alpha-glucan-branching enzyme
[15]	Q14152	Gln->pyro-Glu	Q	25	-	34	26.3	5.84	8.2e-11	695.849	2	-1.3	QPALDVLYDVMK	Gln->pyro-Glu@1;Oxidation@11	769AB_S2_E8R1_HMEC_ITMSms2cid	46.418	17.9	8.6e-05	1	166571	HUMAN	Eukaryotic translation initiation factor 3 subunit A
[15]	Q14152	Met-loss	M	1	-	34	26.3	5.84	8.2e-11	478.589	3	-1	MPAYFQRPENALK	Met-loss@1	769AB_S2_E8R1_HMEC_ITMSms2cid	31.674	20.4	0.00014	1	166571	HUMAN	Eukaryotic translation initiation factor 3 subunit A
[15]	Q14152	Oxidation	M	35	-	34	26.3	5.84	8.2e-11	768.408	2	-3	KQPALDVLYDVMK	Oxidation@12	769AB_S2_E8R1_HMEC_ITMSms2cid	36.913	25.7	1e-07	1	166571	HUMAN	Eukaryotic translation initiation factor 3 subunit A
[15]	Q14152	Oxidation	M	203	-	34	26.3	5.84	8.2e-11	514.767	2	-3.9	MHLSQIQR	Oxidation@1	769AB_S2_E8R1_HMEC_ITMSms2cid	22.609	15.2	0.0011	1	166571	HUMAN	Eukaryotic translation initiation factor 3 subunit A
[15]	Q14152	Oxidation	M	228	-	34	26.3	5.84	8.2e-11	669.312	4	-4.5	HHNQSTAINLNNPESQSMHLETR	Oxidation@18	769AB_S2_E8R1_HMEC_ITMSms2cid	28.5	30.9	0.00014	1	166571	HUMAN	Eukaryotic translation initiation factor 3 subunit A
[15]	Q14152	Oxidation	M	243	-	34	26.3	5.84	8.2e-11	1062.54	2	-2.3	LVQLDSAISMELWQEAFK	Oxidation@10	769AB_S2_E8R1_HMEC_ITMSms2cid	47.816	47.2	2.3e-10	1	166571	HUMAN	Eukaryotic translation initiation factor 3 subunit A
[15]	Q14152	Oxidation	M	272	-	34	26.3	5.84	8.2e-11	569.966	3	-2.7	KPPKPQLMANYYNK	Oxidation@8	769AB_S2_E8R1_HMEC_ITMSms2cid	26.657	21.3	2.2e-05	1	166571	HUMAN	Eukaryotic translation initiation factor 3 subunit A
[15]	Q14152	Oxidation	M	344	-	34	26.3	5.84	8.2e-11	631.337	2	-2.8	LLDMDGIIVEK	Oxidation@4	769AB_S2_E8R1_HMEC_ITMSms2cid	35.89	33.6	2.5e-07	1	166571	HUMAN	Eukaryotic translation initiation factor 3 subunit A
[15]	Q14152	Oxidation	M	374	-	34	26.3	5.84	8.2e-11	523.785	2	-3.4	IGLINDMVR	Oxidation@7	769AB_S2_E8R1_HMEC_ITMSms2cid	34.091	27	3.5e-06	1	166571	HUMAN	Eukaryotic translation initiation factor 3 subunit A
[15]	Q14152	Oxidation	M	514	-	34	26.3	5.84	8.2e-11	1010.99	2	-2.4	EDAPIGPHLQSMPSEQIR	Oxidation@12	769AB_S2_E8R1_HMEC_ITMSms2cid	32.082	31.3	6.9e-09	1	166571	HUMAN	Eukaryotic translation initiation factor 3 subunit A
[15]	Q14152	Oxidation	M	526	-	34	26.3	5.84	8.2e-11	639.837	2	-3.5	NQLTAMSSVLAK	Oxidation@6	769AB_S2_E8R1_HMEC_ITMSms2cid	31.155	41.3	2.6e-08	1	166571	HUMAN	Eukaryotic translation initiation factor 3 subunit A
[15]	Q14152	Phospho	T	574	-	34	26.3	5.84	8.2e-11	504.513	4	1.2	EHQRILARRQTIEER	Phospho@11	769AB_S2_E8R1_HMEC_ITMSms2cid	57.54	16.9	0.0096	1	166571	HUMAN	Eukaryotic translation initiation factor 3 subunit A
[16]	P33992	Gln->pyro-Glu	Q	91	-	32	41.3	5.09	1.2e-09	780.404	2	-3.3	QPAEHLQLLEEAAK	Gln->pyro-Glu@1	769AB_S1_B6R2_NCI-H1975_ITMSms2cid	40.047	28.7	1.6e-06	1	82286.3	HUMAN	DNA replication licensing factor MCM5
[16]	P33992	Gln->pyro-Glu	Q	701	-	32	41.3	5.09	1.2e-09	617.32	2	-3.2	QKYPEHAIHK	Gln->pyro-Glu@1	450AB_S2_B6R1_IBL1_ITMSms2cid	26.766	28.3	6.6e-07	1	82286.3	HUMAN	DNA replication licensing factor MCM5
[16]	P33992	Oxidation	M	184	-	32	41.3	5.09	1.2e-09	701.702	3	-5.5	NTLTNIAMRPGLEGYALPR	Oxidation@8	769AB_S1_B6R2_NCI-H1975_ITMSms2cid	38.818	35.1	1.7e-09	1	82286.3	HUMAN	DNA replication licensing factor MCM5
[16]	P33992	Oxidation	M	241	-	32	41.3	5.09	1.2e-09	852.917	2	-6.5	LQELPDAVPHGEMPR	Oxidation@13	769AB_S1_B6R2_NCI-H1975_ITMSms2cid	32.536	41.7	4.7e-09	1	82286.3	HUMAN	DNA replication licensing factor MCM5
[16]	P33992	Oxidation	M	266	-	32	41.3	5.09	1.2e-09	570.818	2	-3.3	VTIMGIYSIK	Oxidation@4	769AB_S1_B6R2_NCI-H1975_ITMSms2cid	38.14	27.6	1.4e-06	1	82286.3	HUMAN	DNA replication licensing factor MCM5
[16]	P33992	Oxidation	M	349	-	32	41.3	5.09	1.2e-09	734.376	2	-4.4	SIAPSIFGGTDMKK	Oxidation@12	450AB_S2_B6R1_IBL1_ITMSms2cid	37.755	34.7	3.5e-09	1	82286.3	HUMAN	DNA replication licensing factor MCM5
[16]	P33992	Oxidation	M	379	-	32	41.3	5.09	1.2e-09	562.963	3	-5.9	RGDINLLMLGDPGTAK	Oxidation@8	769AB_S1_B6R2_NCI-H1975_ITMSms2cid	38.126	24.1	1.1e-06	1	82286.3	HUMAN	DNA replication licensing factor MCM5
[16]	P33992	Oxidation	M	419	-	32	41.3	5.09	1.2e-09	612.302	2	-6.8	GSSAAGLTASVMR	Oxidation@12	769AB_S1_B6R2_NCI-H1975_ITMSms2cid	30.07	34.6	3.3e-09	1	82286.3	HUMAN	DNA replication licensing factor MCM5
[16]	P33992	Oxidation	M	462	-	32	41.3	5.09	1.2e-09	767.373	3	-5.7	EDDRVAIHEAMEQQTISIAK	Oxidation@11	450AB_S2_B6R1_IBL1_ITMSms2cid	36.695	15.4	0.0009	1	82286.3	HUMAN	DNA replication licensing factor MCM5
[16]	P33992	Oxidation	M	507	-	32	41.3	5.09	1.2e-09	812.383	2	-6.1	GEDNIDFMPTILSR	Oxidation@8	450AB_S2_B6R1_IBL1_ITMSms2cid	46.183	20.8	1.9e-06	1	82286.3	HUMAN	DNA replication licensing factor MCM5
[16]	P33992	Oxidation	M	516	-	32	41.3	5.09	1.2e-09	969.452	2	-4.5	FDMIFIVKDEHNEER	Oxidation@3	450AB_S2_B6R1_IBL1_ITMSms2cid	38.287	31.3	2.4e-08	1	82286.3	HUMAN	DNA replication licensing factor MCM5
[16]	P33992	Oxidation	M	531	-	32	41.3	5.09	1.2e-09	871.088	3	-1.4	FDMIFIVKDEHNEERDVMLAK	Oxidation@3;Oxidation@18	450AB_S2_B6R1_IBL1_ITMSms2cid	40.133	16.3	0.0005	1	82286.3	HUMAN	DNA replication licensing factor MCM5
[16]	P33992	Oxidation	M	626	-	32	41.3	5.09	1.2e-09	982.492	2	-1.7	MKLQPFATEADVEEALR	Oxidation@1	450AB_S2_B6R1_IBL1_ITMSms2cid	45.724	37.1	6e-08	1	82286.3	HUMAN	DNA replication licensing factor MCM5
[16]	P33992	Phospho	S	512	14	32	41.3	5.09	1.2e-09	839.9	4	5	WDETKGEDNIDFMPTILSRFDMIFIVK	Phospho@18=14;Oxidation@22=14	450AB_1_A7R1_Daudi_ITMSms2cid	39.129	17.2	0.007	1	82286.3	HUMAN	DNA replication licensing factor MCM5
[17]	P13639	Met-loss	M	1	-	26	28.7	6.41	1.3e-11	546.296	2	0.31	MVNFTVDQIR	Met-loss@1	450AB_S2_B6R1_IBL1_ITMSms2cid	40.409	28.6	1.9e-06	1	95339	HUMAN	Elongation factor 2
[17]	P13639	Oxidation	M	22	-	26	28.7	6.41	1.3e-11	662.326	2	-2.6	NMSVIAHVDHGK	Oxidation@2	450AB_S2_B6R1_IBL1_ITMSms2cid	26.68	32.2	1.4e-07	1	95339	HUMAN	Elongation factor 2
[17]	P13639	Oxidation	M	231	-	26	28.7	6.41	1.3e-11	551.762	2	-6.4	QFAEMYVAK	Oxidation@5	450AB_S2_B6R1_IBL1_ITMSms2cid	34.784	18.4	1.2e-05	1	95339	HUMAN	Elongation factor 2
[17]	P13639	Oxidation	M	353	-	26	28.7	6.41	1.3e-11	1308.72	2	1.3	WLPAGDALLQMITIHLPSPVTAQK	Oxidation@11	450AB_S2_B6R1_IBL1_ITMSms2cid	54.805	36.7	4.5e-10	1	95339	HUMAN	Elongation factor 2
[17]	P13639	Oxidation	M	395	-	26	28.7	6.41	1.3e-11	536.261	2	-6.5	GPLMMYISK	Oxidation@4;Oxidation@5	450AB_S2_B6R1_IBL1_ITMSms2cid	37.801	25.4	1.7e-07	1	95339	HUMAN	Elongation factor 2
[17]	P13639	Oxidation	M	396	-	26	28.7	6.41	1.3e-11	536.261	2	-6.5	GPLMMYISK	Oxidation@4;Oxidation@5	450AB_S2_B6R1_IBL1_ITMSms2cid	37.801	25.4	1.7e-07	1	95339	HUMAN	Elongation factor 2
[17]	P13639	Oxidation	M	430	-	26	28.7	6.41	1.3e-11	547.269	2	-2.9	IMGPNYTPGK	Oxidation@2	450AB_S2_B6R1_IBL1_ITMSms2cid	31.72	28.4	8.3e-07	1	95339	HUMAN	Elongation factor 2
[17]	P13639	Oxidation	M	494	-	26	28.7	6.41	1.3e-11	816.38	2	-3.9	TGTITTFEHAHNMR	Oxidation@13	450AB_S2_B6R1_IBL1_ITMSms2cid	29.986	34.4	1.1e-07	1	95339	HUMAN	Elongation factor 2
[17]	P13639	Oxidation	M	604	-	26	28.7	6.41	1.3e-11	1251.63	2	2.7	HNRLYMKARPFPDGLAEDIDK	Oxidation@6	450AB_1_A7R1_Daudi_ITMSms2cid	44.949	15.2	0.0025	1	95339	HUMAN	Elongation factor 2
[17]	P13639	Oxidation	M	781	-	26	28.7	6.41	1.3e-11	1031.51	4	-3.1	KRGHVFEESQVAGTPMFVVKAYLPVNESFGFTADLR	Oxidation@16;Phospho@9|14	809AB_S1_C6R1_MDA-Mb-468_ITMSms2cid	62.834	18.1	0.0037	1	95339	HUMAN	Elongation factor 2
[18]	Q8N1F7	Oxidation	M	124	-	30	45.5	5.08	1.5e-09	419.517	3	-1.2	TFGMAEEYHR	Oxidation@4	769AB_S2_E8R1_HMEC_ITMSms2cid	27.011	18.4	4.7e-05	1	93489.1	HUMAN	Nuclear pore complex protein Nup93
[18]	Q8N1F7	Oxidation	M	133	-	30	45.5	5.08	1.5e-09	697.336	2	-1.3	ESMLVEWEQVK	Oxidation@3	769AB_S1_B6R2_NCI-H1975_ITMSms2cid	38.181	26.6	1.3e-06	1	93489.1	HUMAN	Nuclear pore complex protein Nup93
[18]	Q8N1F7	Oxidation	M	183	-	30	45.5	5.08	1.5e-09	693.314	2	-11	SSLDNIEMAYAR	Oxidation@8	769AB_S2_E8R1_HMEC_ITMSms2cid	36.204	29.9	4.9e-07	1	93489.1	HUMAN	Nuclear pore complex protein Nup93
[18]	Q8N1F7	Oxidation	M	223	-	30	45.5	5.08	1.5e-09	615.276	2	-7.8	SISDMWTMVK	Oxidation@5;Oxidation@8	769AB_S1_B6R2_NCI-H1975_ITMSms2cid	35.602	17.8	4.1e-05	1	93489.1	HUMAN	Nuclear pore complex protein Nup93
[18]	Q8N1F7	Oxidation	M	226	-	30	45.5	5.08	1.5e-09	615.276	2	-7.8	SISDMWTMVK	Oxidation@5;Oxidation@8	769AB_S1_B6R2_NCI-H1975_ITMSms2cid	35.602	17.8	4.1e-05	1	93489.1	HUMAN	Nuclear pore complex protein Nup93
[18]	Q8N1F7	Oxidation	M	565	-	30	45.5	5.08	1.5e-09	528.902	3	-2.2	DEKDSQGENMFLR	Oxidation@10	769AB_S1_B6R2_NCI-H1975_ITMSms2cid	31.233	31.7	3.6e-08	1	93489.1	HUMAN	Nuclear pore complex protein Nup93
[18]	Q8N1F7	Oxidation	M	582	-	30	45.5	5.08	1.5e-09	484.74	2	-2.7	EFDMILGK	Oxidation@4	769AB_S1_B6R2_NCI-H1975_ITMSms2cid	36.565	17.3	0.00011	1	93489.1	HUMAN	Nuclear pore complex protein Nup93
[18]	Q8N1F7	Oxidation	M	642	-	30	45.5	5.08	1.5e-09	431.739	2	-0.16	VLELMNK	Oxidation@5	769AB_S2_E8R1_HMEC_ITMSms2cid	28.39	17.4	0.00037	1	93489.1	HUMAN	Nuclear pore complex protein Nup93
[18]	Q8N1F7	Oxidation	M	666	-	30	45.5	5.08	1.5e-09	631.348	2	-3.5	LKNMALSIAER	Oxidation@4	809AB_S1_C6R1_MDA-Mb-468_ITMSms2cid	28.789	25	4.9e-06	1	93489.1	HUMAN	Nuclear pore complex protein Nup93
[18]	Q8N1F7	Oxidation	M	753	-	30	45.5	5.08	1.5e-09	745.731	3	-3.2	HNLSEVLLATMNILFTQFK	Oxidation@11	809AB_S1_C6R1_MDA-Mb-468_ITMSms2cid	49.041	20.8	1.6e-05	1	93489.1	HUMAN	Nuclear pore complex protein Nup93
[18]	Q8N1F7	Oxidation	M	798	-	30	45.5	5.08	1.5e-09	699.874	2	-3	TLITFAGMIPYR	Oxidation@8	769AB_S1_B6R2_NCI-H1975_ITMSms2cid	42.258	38.1	6e-09	1	93489.1	HUMAN	Nuclear pore complex protein Nup93
[18]	Q8N1F7	Phospho	S	335	14	30	45.5	5.08	1.5e-09	1027.49	4	11	CGDLLAASQVVNRAQHQLGEFKTWFQEYMNSKDR	Phospho@8=14	809AB_S1_C6R1_MDA-Mb-468_ITMSms2cid	86.61	16.5	0.011	1	93489.1	HUMAN	Nuclear pore complex protein Nup93
[19]	P46940	Oxidation	M	145	24	26	19.3	6.47	4.1e-11	886.826	5	0.99	HTDNVIQWLNAMDEIGLPKIFYPETTDIYDRKNMPR	Phospho@2=15;Oxidation@34=24	809AB_S1_C6R1_MDA-Mb-468_ITMSms2cid	45.455	18.7	0.0029	1	189254	HUMAN	Ras GTPase-activating-like protein IQGAP1
[19]	P46940	Oxidation	M	185	-	26	19.3	6.47	4.1e-11	742.83	2	-2.7	VDFTEEEINNMK	Oxidation@11	769AB_S1_D6R1_MRC5_ITMSms2cid	32.849	39.7	6.5e-10	1	189254	HUMAN	Ras GTPase-activating-like protein IQGAP1
[19]	P46940	Oxidation	M	196	-	26	19.3	6.47	4.1e-11	579.284	2	-4.3	YGIQMPAFSK	Oxidation@5	769AB_S1_D6R1_MRC5_ITMSms2cid	33.159	31.4	1.5e-08	1	189254	HUMAN	Ras GTPase-activating-like protein IQGAP1
[19]	P46940	Oxidation	M	502	-	26	19.3	6.47	4.1e-11	464.227	2	-2.7	YLDELMK	Oxidation@6	769AB_S1_D6R1_MRC5_ITMSms2cid	31.132	17.7	0.00017	1	189254	HUMAN	Ras GTPase-activating-like protein IQGAP1
[19]	P46940	Oxidation	M	1054	-	26	19.3	6.47	4.1e-11	725.38	4	6.6	SKVDQIQEIVTGNPTVIKMVVSFNR	Oxidation@19;Phospho@1|11	450AB_S2_B6R1_IBL1_ITMSms2cid	29.779	17	0.0056	1	189254	HUMAN	Ras GTPase-activating-like protein IQGAP1
[19]	P46940	Oxidation	M	1240	7	26	19.3	6.47	4.1e-11	1027.49	4	-5.5	MLQHAASNKMFLGDNAHLSIINEYLSQSYQKFRR	Oxidation@10=7;Phospho@24|26|28|29	809AB_S1_C6R1_MDA-Mb-468_ITMSms2cid	87.661	17.3	0.018	1	189254	HUMAN	Ras GTPase-activating-like protein IQGAP1
[19]	P46940	Phospho	T	113	15	26	19.3	6.47	4.1e-11	886.826	5	0.99	HTDNVIQWLNAMDEIGLPKIFYPETTDIYDRKNMPR	Phospho@2=15;Oxidation@34=24	809AB_S1_C6R1_MDA-Mb-468_ITMSms2cid	45.455	18.7	0.0029	1	189254	HUMAN	Ras GTPase-activating-like protein IQGAP1
[19]	P46940	Phospho	T	1050	8	26	19.3	6.47	4.1e-11	483.923	6	7.8	SKVDQIQEIVTGNPTVIKMVVSFNR	Phospho@15=8;Oxidation@19	450AB_S2_B6R1_IBL1_ITMSms2cid	27.97	15.9	0.013	1	189254	HUMAN	Ras GTPase-activating-like protein IQGAP1
[20]	P14923	Oxidation	M	164	-	24	31.9	6	1.3e-10	545.798	2	-2.9	AAMIVNQLSK	Oxidation@3	769AB_S2_E8R1_HMEC_ITMSms2cid	29.716	28.9	1.7e-05	1	81745.5	HUMAN	Junction plakoglobin
[20]	P14923	Oxidation	M	180	-	24	31.9	6	1.3e-10	714.404	2	-2.8	ALMGSPQLVAAVVR	Oxidation@3	769AB_S2_E8R1_HMEC_ITMSms2cid	37.809	40.5	2.6e-07	1	81745.5	HUMAN	Junction plakoglobin
[20]	P14923	Oxidation	M	193	-	24	31.9	6	1.3e-10	684.804	2	-3.6	TMQNTSDLDTAR	Oxidation@2	769AB_S2_E8R1_HMEC_ITMSms2cid	24.832	26.6	8.5e-08	1	81745.5	HUMAN	Junction plakoglobin
[20]	P14923	Oxidation	M	471	-	24	31.9	6	1.3e-10	462.212	3	-3.9	HPEAEMAQNSVR	Oxidation@6	769AB_S2_E8R1_HMEC_ITMSms2cid	20.673	32.5	5.6e-07	1	81745.5	HUMAN	Junction plakoglobin
[20]	P14923	Oxidation	M	556	27	24	31.9	6	1.3e-10	1028	4	-2.3	HVAAGTQQPYTDGVRMEEIVEGCTGALHILARDPMNR	Oxidation@16=27	809AB_S1_C6R1_MDA-Mb-468_ITMSms2cid	90.354	15	0.03	1	81745.5	HUMAN	Junction plakoglobin
[20]	P14923	Oxidation	M	575	13	24	31.9	6	1.3e-10	1028	4	-2.6	HVAAGTQQPYTDGVRMEEIVEGCTGALHILARDPMNR	Oxidation@35=13	809AB_S1_C6R1_MDA-Mb-468_ITMSms2cid	52.898	16.4	0.026	1	81745.5	HUMAN	Junction plakoglobin
[21]	Q08211	Oxidation	M	369	-	24	21.4	6.41	1.6e-11	834.734	3	-2.3	NELMYQLEQDHDLQAILQER	Oxidation@4	769AB_S2_E8R1_HMEC_ITMSms2cid	42.206	31.5	1e-07	1	140960	HUMAN	ATP-dependent RNA helicase A
[21]	Q08211	Oxidation	M	624	-	24	21.4	6.41	1.6e-11	533.264	2	-3.7	LSMSQLNEK	Oxidation@3	769AB_S2_E8R1_HMEC_ITMSms2cid	24.794	32.6	1.2e-06	1	140960	HUMAN	ATP-dependent RNA helicase A
[21]	Q08211	Oxidation	M	672	-	24	21.4	6.41	1.6e-11	493.228	3	-4.2	HLEMNPHFGSHR	Oxidation@4	769AB_S2_E8R1_HMEC_ITMSms2cid	22.419	20.7	1.7e-05	1	140960	HUMAN	ATP-dependent RNA helicase A
[21]	Q08211	Oxidation	M	745	-	24	21.4	6.41	1.6e-11	695.665	3	-2.2	LFTAHNNMTNYATVWASK	Oxidation@8	769AB_S2_E8R1_HMEC_ITMSms2cid	35.939	25.9	3.6e-06	1	140960	HUMAN	ATP-dependent RNA helicase A
[21]	Q08211	Oxidation	M	789	-	24	21.4	6.41	1.6e-11	712.319	2	-3	LETHMTPEMFR	Oxidation@5;Oxidation@9	769AB_S2_E8R1_HMEC_ITMSms2cid	27.33	22.6	5e-07	1	140960	HUMAN	ATP-dependent RNA helicase A
[21]	Q08211	Oxidation	M	793	-	24	21.4	6.41	1.6e-11	712.319	2	-3	LETHMTPEMFR	Oxidation@5;Oxidation@9	769AB_S2_E8R1_HMEC_ITMSms2cid	27.33	22.6	5e-07	1	140960	HUMAN	ATP-dependent RNA helicase A
[21]	Q08211	Oxidation	M	947	-	24	21.4	6.41	1.6e-11	417.728	2	-2	LNMATLR	Oxidation@3	769AB_S2_E8R1_HMEC_ITMSms2cid	25.59	19.9	0.00017	1	140960	HUMAN	ATP-dependent RNA helicase A
[21]	Q08211	Phospho	S	1139	11	24	21.4	6.41	1.6e-11	686.834	6	-8.3	MLNMIRQISRPSAAGINLMIGSTRYGDGPRPPKMAR	Phospho@9=11;Phospho@12|22	809AB_S1_C6R1_MDA-Mb-468_ITMSms2cid	40.407	15	0.038	1	140960	HUMAN	ATP-dependent RNA helicase A
[21]	Q08211	Phospho	S	1152	17	24	21.4	6.41	1.6e-11	1016.49	2	11	QISRPSAAGINLMIGSTR	Phospho@16=17;Phospho@17=17	769AB_S1_D6R1_MRC5_ITMSms2cid	31.354	15.9	0.0013	1	140960	HUMAN	ATP-dependent RNA helicase A
[21]	Q08211	Phospho	T	1153	17	24	21.4	6.41	1.6e-11	1016.49	2	11	QISRPSAAGINLMIGSTR	Phospho@16=17;Phospho@17=17	769AB_S1_D6R1_MRC5_ITMSms2cid	31.354	15.9	0.0013	1	140960	HUMAN	ATP-dependent RNA helicase A
[22]	P45974	Met-loss+Acetyl	M	1	-	20	38.2	6.9	6.9e-12	891.997	2	1.6	MAELSEEALLSVLPTIR	Met-loss+Acetyl@1	450AB_S2_B6R1_IBL1_ITMSms2cid	60.708	19.8	7.9e-05	1	95787.1	HUMAN	Ubiquitin carboxyl-terminal hydrolase 5
[22]	P45974	Oxidation	M	293	-	20	38.2	6.9	6.9e-12	619.614	3	-4.7	TDKTMTELEIDMNQR	Oxidation@5;Oxidation@12	769AB_S1_D6R1_MRC5_ITMSms2cid	28.792	29.5	1e-06	1	95787.1	HUMAN	Ubiquitin carboxyl-terminal hydrolase 5
[22]	P45974	Oxidation	M	300	-	20	38.2	6.9	6.9e-12	619.614	3	-4.7	TDKTMTELEIDMNQR	Oxidation@5;Oxidation@12	769AB_S1_D6R1_MRC5_ITMSms2cid	28.792	29.5	1e-06	1	95787.1	HUMAN	Ubiquitin carboxyl-terminal hydrolase 5
[22]	P45974	Oxidation	M	446	-	20	38.2	6.9	6.9e-12	712.014	3	-4.8	QQDAQEFFLHLINMVER	Oxidation@14	769AB_S2_E8R1_HMEC_ITMSms2cid	47.72	22.7	2.7e-06	1	95787.1	HUMAN	Ubiquitin carboxyl-terminal hydrolase 5
[22]	P45974	Oxidation	M	487	-	20	38.2	6.9	6.9e-12	1038.17	3	-0.3	VDYIMQLPVPMDAALNKEELLEYEEK	Oxidation@5;Oxidation@11	769AB_S2_E8R1_HMEC_ITMSms2cid	41.806	21.4	1e-05	1	95787.1	HUMAN	Ubiquitin carboxyl-terminal hydrolase 5
[22]	P45974	Oxidation	M	493	-	20	38.2	6.9	6.9e-12	1038.17	3	-0.3	VDYIMQLPVPMDAALNKEELLEYEEK	Oxidation@5;Oxidation@11	769AB_S2_E8R1_HMEC_ITMSms2cid	41.806	21.4	1e-05	1	95787.1	HUMAN	Ubiquitin carboxyl-terminal hydrolase 5
[22]	P45974	Oxidation	M	517	-	20	38.2	6.9	6.9e-12	472.765	2	-1.5	MALPELVR	Oxidation@1	769AB_S2_E8R1_HMEC_ITMSms2cid	34.759	16.5	0.00022	1	95787.1	HUMAN	Ubiquitin carboxyl-terminal hydrolase 5
[22]	P45974	Oxidation	M	593	-	20	38.2	6.9	6.9e-12	711.035	3	-1.5	KLDVSIEMPEELDISQLR	Oxidation@8	769AB_S2_E8R1_HMEC_ITMSms2cid	40.023	34.8	7.4e-08	1	95787.1	HUMAN	Ubiquitin carboxyl-terminal hydrolase 5
[23]	P07437	Oxidation	M	164	-	17	51.8	7.17	7.7e-11	668.352	2	-1.2	IMNTFSVVPSPK	Oxidation@2	769AB_S1_D6R1_MRC5_ITMSms2cid	34.918	35.6	3.2e-09	1	49671.3	HUMAN	Tubulin beta chain
[23]	P07437	Oxidation	M	267	-	17	51.8	7.17	7.7e-11	546.279	3	-4.2	LHFFMPGFAPLTSR	Oxidation@5	809AB_S1_C6R1_MDA-Mb-468_ITMSms2cid	40.186	30.5	2.5e-06	1	49671.3	HUMAN	Tubulin beta chain
[23]	P07437	Oxidation	M	330	-	17	51.8	7.17	7.7e-11	731.845	2	-1.7	EVDEQMLNVQNK	Oxidation@6	769AB_S1_D6R1_MRC5_ITMSms2cid	28.421	35.7	1.5e-07	1	49671.3	HUMAN	Tubulin beta chain
[23]	P07437	Oxidation	M	363	-	17	51.8	7.17	7.7e-11	943.49	2	0.059	MAVTFIGNSTAIQELFK	Oxidation@1	809AB_S1_C6R1_MDA-Mb-468_ITMSms2cid	45.276	56.6	7.7e-11	1	49671.3	HUMAN	Tubulin beta chain
[24]	P13798	Gln->pyro-Glu	Q	4	-	17	29.4	7.34	1.4e-12	836.429	2	-4.6	QVLLSEPEEAAALYR	Gln->pyro-Glu@1	769AB_S1_B6R2_NCI-H1975_ITMSms2cid	46.345	37.6	7.2e-08	1	81225.3	HUMAN	Acylamino-acid-releasing enzyme
[24]	P13798	Gln->pyro-Glu	Q	66	-	17	29.4	7.34	1.4e-12	1274.61	2	-1.3	QYLVFHDGDSVVFAGPAGNSVETR	Gln->pyro-Glu@1	450AB_1_A7R1_Daudi_ITMSms2cid	45.73	55.9	1.4e-12	1	81225.3	HUMAN	Acylamino-acid-releasing enzyme
[24]	P13798	Oxidation	M	216	-	17	29.4	7.34	1.4e-12	1033.94	2	-5.1	GDQFVFYEDWGENMVSK	Oxidation@14	450AB_1_A7R1_Daudi_ITMSms2cid	44.854	29.2	5.4e-09	1	81225.3	HUMAN	Acylamino-acid-releasing enzyme
[24]	P13798	Oxidation	M	420	-	17	29.4	7.34	1.4e-12	1272.68	2	-2.4	LLTIDQDLMVAQFSTPSLPPTLK	Oxidation@9	450AB_1_A7R1_Daudi_ITMSms2cid	47.925	40.1	2.1e-09	1	81225.3	HUMAN	Acylamino-acid-releasing enzyme
[24]	P13798	Oxidation	M	528	-	17	29.4	7.34	1.4e-12	649.849	2	-2	MGFAVLLVNYR	Oxidation@1	450AB_1_A7R1_Daudi_ITMSms2cid	43.615	31	1.5e-07	1	81225.3	HUMAN	Acylamino-acid-releasing enzyme
[24]	P13798	Oxidation	M	670	-	17	29.4	7.34	1.4e-12	701.371	2	-4.2	TPLLLMLGQEDR	Oxidation@6	769AB_S1_B6R2_NCI-H1975_ITMSms2cid	41.426	40.6	7.5e-09	1	81225.3	HUMAN	Acylamino-acid-releasing enzyme
[25]	O60313	Oxidation	M	267	-	17	23.3	6.66	4.6e-11	1092.51	3	2.3	SLIDMYSEVLDVLSDYDASYNTQDHLPR	Oxidation@5	809AB_S1_C6R1_MDA-Mb-468_ITMSms2cid	49.555	40.7	7.7e-10	1	111632	HUMAN	Dynamin-like 120 kDa protein, mitochondrial
[25]	O60313	Oxidation	M	455	-	17	23.3	6.66	4.6e-11	557.61	3	-0.18	SIVTDLVSQMDPHGR	Oxidation@10	809AB_S1_C6R1_MDA-Mb-468_ITMSms2cid	36.061	18.7	7.6e-05	1	111632	HUMAN	Dynamin-like 120 kDa protein, mitochondrial
[25]	O60313	Oxidation	M	766	-	17	23.3	6.66	4.6e-11	988.479	2	3.9	LKDTENAIENMVGPDWK	Oxidation@11	809AB_S1_C6R1_MDA-Mb-468_ITMSms2cid	34.455	43.8	2.9e-09	1	111632	HUMAN	Dynamin-like 120 kDa protein, mitochondrial
[25]	O60313	Oxidation	M	886	-	17	23.3	6.66	4.6e-11	560.312	2	-3	MLAITANTLR	Oxidation@1	809AB_S1_C6R1_MDA-Mb-468_ITMSms2cid	33.525	31.6	4.1e-07	1	111632	HUMAN	Dynamin-like 120 kDa protein, mitochondrial
[26]	P47897	Oxidation	M	146	-	24	33.3	4.67	9.2e-10	524.241	3	-4	YHFNMGLLMGEAR	Oxidation@5;Oxidation@9	769AB_S1_B6R2_NCI-H1975_ITMSms2cid	34.963	21.2	2e-05	1	87799.5	HUMAN	Glutamine--tRNA ligase
[26]	P47897	Oxidation	M	150	-	24	33.3	4.67	9.2e-10	524.241	3	-4	YHFNMGLLMGEAR	Oxidation@5;Oxidation@9	769AB_S1_B6R2_NCI-H1975_ITMSms2cid	34.963	21.2	2e-05	1	87799.5	HUMAN	Glutamine--tRNA ligase
[26]	P47897	Oxidation	M	250	-	24	33.3	4.67	9.2e-10	562.965	3	-5.2	TPGYVVTPHTMNLLK	Oxidation@11	769AB_S1_B6R2_NCI-H1975_ITMSms2cid	34.123	31.9	1.2e-08	1	87799.5	HUMAN	Glutamine--tRNA ligase
[26]	P47897	Oxidation	M	408	-	24	33.3	4.67	9.2e-10	828.393	2	1.3	LVMEDGKMDPVAYR	Oxidation@3;Oxidation@8	809AB_S1_C6R1_MDA-Mb-468_ITMSms2cid	28.459	31.8	1.9e-08	1	87799.5	HUMAN	Glutamine--tRNA ligase
[26]	P47897	Oxidation	M	413	-	24	33.3	4.67	9.2e-10	828.393	2	1.3	LVMEDGKMDPVAYR	Oxidation@3;Oxidation@8	809AB_S1_C6R1_MDA-Mb-468_ITMSms2cid	28.459	31.8	1.9e-08	1	87799.5	HUMAN	Glutamine--tRNA ligase
[26]	P47897	Oxidation	M	569	-	24	33.3	4.67	9.2e-10	503.271	2	-4.2	AMAVLESLR	Oxidation@2	769AB_S1_B6R2_NCI-H1975_ITMSms2cid	33.807	21.8	2.3e-05	1	87799.5	HUMAN	Glutamine--tRNA ligase
[27]	P14317	Oxidation	M	215	-	21	37.9	5.36	7.2e-11	866.398	2	-0.64	SAVGFNEMEAPTTAYK	Oxidation@8	450AB_1_A7R1_Daudi_ITMSms2cid	32.447	42.2	1.8e-09	1	54014.4	HUMAN	Hematopoietic lineage cell-specific protein
[27]	P14317	Oxidation	M	285	-	21	37.9	5.36	7.2e-11	814.101	3	-1.1	RSPEAPQPVIAMEEPAVPAPLPK	Oxidation@12	450AB_1_A7R1_Daudi_ITMSms2cid	35.063	39.2	5.9e-09	1	54014.4	HUMAN	Hematopoietic lineage cell-specific protein
[28]	Q86Y56	Met-loss+Acetyl	M	1	-	19	29.2	6.18	8.2e-12	1365.18	2	-4.7	MAALGVAEAVAAPHPAEGAETAEAVELSR	Met-loss+Acetyl@1	450AB_S2_B6R1_IBL1_ITMSms2cid	50.077	43.4	1.6e-11	1	93522	HUMAN	Dynein axonemal assembly factor 5
[28]	Q86Y56	Oxidation	M	460	-	19	29.2	6.18	8.2e-12	745.405	2	-1.6	TPSASGLLVLASAMR	Oxidation@14	769AB_S1_B6R2_NCI-H1975_ITMSms2cid	41.049	44.9	6.7e-10	1	93522	HUMAN	Dynein axonemal assembly factor 5
[28]	Q86Y56	Oxidation	M	703	-	19	29.2	6.18	8.2e-12	1096.53	2	-2.8	DVQETLMPQVLTTLEEDSK	Oxidation@7	769AB_S1_B6R2_NCI-H1975_ITMSms2cid	43.955	34.5	6e-09	1	93522	HUMAN	Dynein axonemal assembly factor 5
[29]	P14314	Oxidation	M	130	-	18	25	5.64	1.5e-10	796.887	2	-1.5	ERESLQQMAEVTR	Oxidation@8	809AB_S1_C6R1_MDA-Mb-468_ITMSms2cid	26.974	28.5	1.4e-07	1	59425.9	HUMAN	Glucosidase 2 subunit beta
[29]	P14314	Oxidation	M	387	-	18	25	5.64	1.5e-10	408.536	3	-0.39	SLKDMEESIR	Oxidation@5	769AB_S1_D6R1_MRC5_ITMSms2cid	26.376	18.5	6.7e-05	1	59425.9	HUMAN	Glucosidase 2 subunit beta
[29]	P14314	Oxidation	M	463	-	18	25	5.64	1.5e-10	687.83	4	-3.4	LGGSPTSLGTWGSWIGPDHDKFSAMK	Oxidation@25	809AB_S1_C6R1_MDA-Mb-468_ITMSms2cid	39.69	30.9	3.3e-06	1	59425.9	HUMAN	Glucosidase 2 subunit beta
[29]	P14314	Oxidation	M	490	-	18	25	5.64	1.5e-10	677.809	2	-3.1	ETMVTSTTEPSR	Oxidation@3	769AB_S1_D6R1_MRC5_ITMSms2cid	24.656	26.7	1.4e-07	1	59425.9	HUMAN	Glucosidase 2 subunit beta

## Sheet: Nature 2016 Type1_NT
Hsp90-beta										Daudi		IBL1		MDA-MB-468		NCI-H1975			HMEC		MRC5								Type 1 Normalized peptide intensity					NT normalized peptide intensity
Acc #	Modification	AA	Site	range	m/z	z	RT	peptide	Modification	450AB_1_A7R1		450AB_S2_B6R1		809AB_S1_C6R1		769AB_S1_B6R2			769AB_S2_E8R1		769AB_S1_D6R1			Type 1 Mean	NT Mean	Type 1/NT	P-Value		Daudi	IBL1	MDA-MB-468	NCI-H1975		HMEC	MRC5
									NF (Normalization Factor)	0.261905		0.097412		1		0.421325			0.121118		0.585921																	raw intensity, individual peptides
P08238	Normalization		41-55	638.30-638.34	638.323	2	33.6	ELISNASDALDK		253000000	966000000	94100000	966000000	966000000	966000000	407000000	966000000		117000000	966000000	566000000	966000000																S226	S255	S263
								RT (min)		33.47		38.34		33.47		34.56			33.77		33.66																	60700	11000	54000
																																						182000	7750	40600
P08238	Phospho	S	226	790.56-790.60	790.578	4	27.3	EISDDEAEEEKGEKEEEDKDDEEKPK	Phospho@3	60700	231764	182000	1.86835e+06	217000	217000	272000	645582		448	3698.87	45700	77996.8		740675	40847.8	18.1325	0.169439		231764	1.86835e+06	217000	645582		3698.87	77996.8			217000	972000	233000
								RT (min)		24.67		30.39		26.49		27.3			25.99		26.26																	272000	550000	20600
																																						448	102000	237000
P08238	Phospho	S	255	909.33-909.37	909.352	2	27	IEDVGSDEEDDSGKDK	Phospho@6=38	11000	42000	972000	9.97824e+06	102000	102000	254000	602860		0	0	29200	49836																45700	159000	294000
				606.55-606.59	606.567	3		IEDVGSDEEDDSGKDK	Phospho@6=38	7750	29590.9	550000	5.64612e+06	159000	159000	238000	564885		8440	69684.1	31300	53420.1																	254000	1560000
								RT (min)		23.77		29.97		25.98		26.89			26.1		25.74																		238000	759000
								Sum			71590.9		1.56244e+07		261000		1.16774e+06			69684.1		103256		5.68437e+06	86470.1	65.7379	0.349012		71590.9	1.56244e+07	261000	1.16774e+06		69684.1	103256				0	636000
																																							8440	286000
Hsp90-alpha										Daudi		IBL1		MDA-MB-468		NCI-H1975			HMEC		MRC5																		29200	1030000
Acc #	Modification	AA	Site	range	m/z	z		peptide	Modification	450AB_1_A7R1		450AB_S2_B6R1		809AB_S1_C6R1		769AB_S1_B6R2			769AB_S2_E8R1		769AB_S1_D6R1																		31300	88500
									NF	0.334004		0.362173		1		0.730382			0.0720322		0.653924																			1190000
P07900	Normalization			646.30-646.34	646.32	2	30.84	ELISNSSDALDK		166000000	4.97e+08	180000000	4.97e+08	497000000	497000000	363000000	497000000		35800000	497000000	325000000	4.97e+08																		1800000
								RT (min)		30.84		35.99		31.38		32.56			31.65		31.53																			3910000
																																								504000
P07900	Phospho	S	263	800.98-801.02	800.998	3	29.8	ESEDKPEIEDVGSDEEEEKK	Phospho@13	54000	161675	237000	654383	636000	636000	1190000	1.62928e+06		20500	284595	146	223.268																		20500
								RT (min)		27.4		33.22		29.03		29.93			29.4		29.4																			0
	Phospho	S	263	939.37-939.41	939.389	3	29.8	ESEDKPEIEDVGSDEEEEKKDGDK	Phospho@13	40600	121555	294000	811767	286000	286000	1800000	2.46446e+06		0	0	0	0																		37900
								RT (min)		27.06		32.09		28.18		29.04			28.5																					0
				736.79-736.83	736.817	4	27.5	ESEDKPEIEDVGSDEEEEKKDGDKK	Phospho@13	233000	697596	1560000	4.30733e+06	1030000	1030000	3910000	5.35336e+06		37900	526154	384000	587225																		146
				982.06-982.10	982.088	3	27.8	ESEDKPEIEDVGSDEEEEKKDGDKK	Phospho@13	20600	61675.9	759000	2.09568e+06	88500	88500	504000	690050		0	0	89900	137478																		0
								RT (min)		24.75		30.64		26.81		27.77			26.84		26.77																			384000
								Sum		348200	1.0425e+06	2850000	7.86917e+06	2040500	2040500	7404000	1.01372e+07		58400	810749	474046	724926		5.27233e+06	767837	6.86647	0.134564		1.0425e+06	7.86917e+06	2040500	1.01372e+07		810749	724926					89900
																																					avg Ca	182925	286719	790169
Hsc70										Daudi		IBL1		MDA-MB-468		NCI-H1975			HMEC		MRC5																avg NTC	23074	17235	66555.8
Acc #	Modification	AA	Site	range	m/z	z		peptide	Modification	450AB_1_A8R1		450AB_S2_B7R1		809AB_S1_C7R1		769AB_S1_B7R2			769AB_S2_E8R1		769AB_S1_D7R1																Ca/NTC	7.92775	16.6358	11.8723
									NF	0.456774		0.334839		1		0.596774			0.12		0.449677
P11142	Normalization			614.80-614.84	614.818	2		VEIIANDQGNR		70800000	155000000	51900000	155000000	155000000	155000000	92500000	155000000		18600000	155000000	69700000	155000000
								RT (min)		27.04		28.38		29.17		28.27			28.67		28.74
	TriMethyl	K	561	729.38-729.42	729.402	2		LQGKINDEDKQK	TriMethyl@4=41	924000	2.02288e+06	2750000	8.21291e+06	129000	129000	36400	60994.6		31.5	262.5	0	0
								RT (min)		23.9		25.27		26.75		25.9			26.42		26.68
				658.65-658.69	658.673	3		ATVEDEKLQGKINDEDK	TriMethyl@11=9	2620000	5.73588e+06	3860000	1.15279e+07	4420000	4420000	5880000	9.85297e+06		486000	4050000	1660000	3.69154e+06
				987.49-987.53	987.507	2		ATVEDEKLQGKINDEDK	TriMethyl@11=9	206900	452959	1030000	3.07611e+06	393000	393000	393000	658541		41600	346667	26200	58264
								RT (min)		25.6		26.78		27.99		27.14			27.5		27.48
								Sum			8.21172e+06		2.2817e+07		4942000		1.05725e+07			4.39693e+06		3.7498e+06		1.16358e+07	4.07336e+06	2.85656	0.147693		8.21172e+06	2.2817e+07	4942000	1.05725e+07		4.39693e+06	3.7498e+06

## Sheet: Nature 2023 ModSearch
Search Name:	MDA_143_FTMSms2hcd/results2 mod search
	Acc #	Modification	AA	Site	SLIP	Num Unique	% Cov	Best Disc Score	Best Expect Val	m/z	z	ppm	DB Peptide	Variable Mods	Fraction	RT	Spectrum	Score	Expect	# in DB	Protein MW	Species	Protein Name
[1]	P08238	Oxidation	M	93	-	95	69.1	13.31	4.9e-24	683.37	2	2.1	TLTLVDTGIGMTK	Oxidation@11	MDA_143_FTMSms2hcd	34.467	1	55.9	1.4e-12	3	83264.9	HUMAN	Heat shock protein HSP 90-beta
[1]	P08238	Oxidation	M	394	-	95	69.1	13.31	4.9e-24	440.216	2	-0.14	EMLQQSK	Oxidation@2	MDA_143_FTMSms2hcd	10.339	1	25.8	5.8e-07	3	83264.9	HUMAN	Heat shock protein HSP 90-beta
[1]	P08238	Oxidation	M	466	-	95	69.1	13.31	4.9e-24	1096.98	2	1.8	YHTSQSGDEMTSLSEYVSR	Oxidation@10	MDA_143_FTMSms2hcd	27.56	1	70.3	5.5e-19	1	83264.9	HUMAN	Heat shock protein HSP 90-beta
[1]	P08238	Oxidation	M	553	-	95	69.1	13.31	4.9e-24	459.421	5	0.75	EGLELPEDEEEKKKMEESK	Oxidation@15	MDA_143_FTMSms2hcd	22.412	1	61.5	7.5e-12	2	83264.9	HUMAN	Heat shock protein HSP 90-beta
[1]	P08238	Oxidation	M	567	-	95	69.1	13.31	4.9e-24	503.287	2	1	LMKEILDK	Oxidation@2	MDA_143_FTMSms2hcd	19.808	1	33.8	0.00011	3	83264.9	HUMAN	Heat shock protein HSP 90-beta
[1]	P08238	Oxidation	M	606	27	95	69.1	13.31	4.9e-24	1160.58	2	9.6	IMKAQALRDNSTMGYMMAKK	Oxidation@2=27;Oxidation@13|16|17	MDA_143_FTMSms2hcd	49.819	1	16.7	0.014	1	83264.9	HUMAN	Heat shock protein HSP 90-beta
[1]	P08238	Oxidation	M	617	52	95	69.1	13.31	4.9e-24	640.753	2	1.7	DNSTMGYMMAK	Oxidation@5=52;Oxidation@8=10	MDA_143_FTMSms2hcd	19.583	2	41.9	1.3e-13	2	83264.9	HUMAN	Heat shock protein HSP 90-beta
[1]	P08238	Oxidation	M	620	49	95	69.1	13.31	4.9e-24	640.752	2	0.9	DNSTMGYMMAK	Oxidation@8=49;Oxidation@9=49	MDA_143_FTMSms2hcd	18.827	1	43.2	3.6e-14	2	83264.9	HUMAN	Heat shock protein HSP 90-beta
[1]	P08238	Oxidation	M	621	49	95	69.1	13.31	4.9e-24	640.752	2	0.9	DNSTMGYMMAK	Oxidation@8=49;Oxidation@9=49	MDA_143_FTMSms2hcd	18.827	1	43.2	3.6e-14	2	83264.9	HUMAN	Heat shock protein HSP 90-beta
[1]	P08238	Oxidation	M	720	-	95	69.1	13.31	4.9e-24	1384.63	3	1.4	LGLGIDEDEVAAEEPNAAVPDEIPPLEGDEDASRMEEVD	Oxidation@35	MDA_143_FTMSms2hcd	45.391	1	54	6.7e-14	1	83264.9	HUMAN	Heat shock protein HSP 90-beta
[1]	P08238	Phospho	S	226	-	95	69.1	13.31	4.9e-24	639.266	3	0.94	EREKEISDDEAEEEK	Phospho@7	MDA_143_FTMSms2hcd	16.386	1	53	2e-10	1	83264.9	HUMAN	Heat shock protein HSP 90-beta
[1]	P08238	Phospho	S	255	-	95	69.1	13.31	4.9e-24	1013.38	2	0.58	IEDVGSDEEDDSGKDKK	Phospho@6;Phospho@12	MDA_143_FTMSms2hcd	16.662	1	40.9	8.6e-13	1	83264.9	HUMAN	Heat shock protein HSP 90-beta
[1]	P08238	Phospho	S	261	-	95	69.1	13.31	4.9e-24	1013.38	2	0.58	IEDVGSDEEDDSGKDKK	Phospho@6;Phospho@12	MDA_143_FTMSms2hcd	16.662	1	40.9	8.6e-13	1	83264.9	HUMAN	Heat shock protein HSP 90-beta
[1]	P08238	Phospho	S	365	52	95	69.1	13.31	4.9e-24	1227.56	2	-0.4	VFIMDSCDELIPEYLNFIR	Phospho@6=52	MDA_143_FTMSms2hcd	57.191	1	15.9	1.4e-05	1	83264.9	HUMAN	Heat shock protein HSP 90-beta
[1]	P08238	Phospho	Y	619	21	95	69.1	13.31	4.9e-24	664.744	2	7	DNSTMGYMMAK	Phospho@7=21	MDA_143_FTMSms2hcd	16.222	1	20.6	1.9e-08	2	83264.9	HUMAN	Heat shock protein HSP 90-beta
[1-1]	P07900	Acetyl	K	693	-	93	64.3	13.31	4.9e-24	1254.08	4	10	IYRMIKLGLGIDEDDPTADDTSAAVTEEMPPLEGDDDTSRMEEVD	Acetyl@6;Oxidation@41=70	MDA_143_FTMSms2hcd	39.194	1	31.2	8.5e-08	1	84660.4	HUMAN	Heat shock protein HSP 90-alpha
[1-1]	P07900	Oxidation	M	98	-	93	64.3	13.31	4.9e-24	683.37	2	2.1	TLTIVDTGIGMTK	Oxidation@11	MDA_143_FTMSms2hcd	34.467	1	55.9	1.4e-12	3	84660.4	HUMAN	Heat shock protein HSP 90-alpha
[1-1]	P07900	Oxidation	M	180	-	93	64.3	13.31	4.9e-24	490.211	2	-0.012	TDTGEPMGR	Oxidation@7	MDA_143_FTMSms2hcd	9.722	1	33.9	3e-10	1	84660.4	HUMAN	Heat shock protein HSP 90-alpha
[1-1]	P07900	Oxidation	M	402	-	93	64.3	13.31	4.9e-24	440.216	2	-0.14	EMLQQSK	Oxidation@2	MDA_143_FTMSms2hcd	10.339	1	25.8	5.8e-07	3	84660.4	HUMAN	Heat shock protein HSP 90-alpha
[1-1]	P07900	Oxidation	M	474	-	93	64.3	13.31	4.9e-24	783.854	2	0.96	YYTSASGDEMVSLK	Oxidation@10	MDA_143_FTMSms2hcd	27.537	1	53.3	5.4e-17	1	84660.4	HUMAN	Heat shock protein HSP 90-alpha
[1-1]	P07900	Oxidation	M	575	-	93	64.3	13.31	4.9e-24	503.286	2	0.82	IMKDILEK	Oxidation@2	MDA_143_FTMSms2hcd	20.691	1	39.5	2.2e-05	1	84660.4	HUMAN	Heat shock protein HSP 90-alpha
[1-1]	P07900	Oxidation	M	625	-	93	64.3	13.31	4.9e-24	610.75	2	0.92	DNSTMGYMAAK	Oxidation@5;Oxidation@8	MDA_143_FTMSms2hcd	15.656	2	45.2	8.5e-12	1	84660.4	HUMAN	Heat shock protein HSP 90-alpha
[1-1]	P07900	Oxidation	M	628	-	93	64.3	13.31	4.9e-24	610.75	2	0.92	DNSTMGYMAAK	Oxidation@5;Oxidation@8	MDA_143_FTMSms2hcd	15.656	2	45.2	8.5e-12	1	84660.4	HUMAN	Heat shock protein HSP 90-alpha
[1-1]	P07900	Oxidation	M	716	-	93	64.3	13.31	4.9e-24	1188.52	3	1	LGLGIDEDDPTADDTSAAVTEEMPPLEGDDDTSR	Oxidation@23	MDA_143_FTMSms2hcd	38.588	1	64	2.3e-15	1	84660.4	HUMAN	Heat shock protein HSP 90-alpha
[1-1]	P07900	Oxidation	M	728	-	93	64.3	13.31	4.9e-24	1394.92	3	1.2	LGLGIDEDDPTADDTSAAVTEEMPPLEGDDDTSRMEEVD	Oxidation@23;Oxidation@35	MDA_143_FTMSms2hcd	39.29	1	56	1.9e-15	1	84660.4	HUMAN	Heat shock protein HSP 90-alpha
[1-1]	P07900	Phospho	S	231	-	93	64.3	13.31	4.9e-24	586.907	3	-0.23	ERDKEVSDDEAEEK	Phospho@7	MDA_143_FTMSms2hcd	13.906	1	46.5	1.3e-09	1	84660.4	HUMAN	Heat shock protein HSP 90-alpha
[1-1]	P07900	Phospho	S	263	63	93	64.3	13.31	4.9e-24	1136.95	2	1.9	ESEDKPEIEDVGSDEEEEK	Phospho@13=63	MDA_143_FTMSms2hcd	24.256	1	64	1.7e-15	1	84660.4	HUMAN	Heat shock protein HSP 90-alpha
[1-2]	P14625	Oxidation	M	154	-	66	59.3	12.64	8.5e-23	510.597	3	0.98	NLLHVTDTGVGMTR	Oxidation@12	MDA_143_FTMSms2hcd	27.934	1	51.7	6.3e-14	1	92469.6	HUMAN	Endoplasmin
[1-2]	P14625	Oxidation	M	293	-	66	59.3	12.64	8.5e-23	869.374	2	1.7	TETVEEPMEEEEAAK	Oxidation@8	MDA_143_FTMSms2hcd	21.726	1	48.9	4.8e-15	1	92469.6	HUMAN	Endoplasmin
[1-2]	P14625	Oxidation	M	336	-	66	59.3	12.64	8.5e-23	853.436	3	3.1	TVWDWELMNDIKPIWQRPSK	Oxidation@8	MDA_143_FTMSms2hcd	43.547	1	56.5	4.2e-16	1	92469.6	HUMAN	Endoplasmin
[1-2]	P14625	Oxidation	M	370	-	66	59.3	12.64	8.5e-23	768.346	3	2.6	ESDDPMAYIHFTAEGEVTFK	Oxidation@6	MDA_143_FTMSms2hcd	39.707	1	52.2	2.1e-10	1	92469.6	HUMAN	Endoplasmin
[1-2]	P14625	Oxidation	M	425	-	66	59.3	12.64	8.5e-23	595.277	3	1.3	RVFITDDFHDMMPK	Oxidation@11;Oxidation@12	MDA_143_FTMSms2hcd	28.056	1	44.3	2.6e-13	1	92469.6	HUMAN	Endoplasmin
[1-2]	P14625	Oxidation	M	426	-	66	59.3	12.64	8.5e-23	595.277	3	1.3	RVFITDDFHDMMPK	Oxidation@11;Oxidation@12	MDA_143_FTMSms2hcd	28.056	1	44.3	2.6e-13	1	92469.6	HUMAN	Endoplasmin
[1-2]	P14625	Oxidation	M	471	-	66	59.3	12.64	8.5e-23	432.747	2	0.47	KTLDMIK	Oxidation@5	MDA_143_FTMSms2hcd	16.277	1	25.6	1.5e-05	1	92469.6	HUMAN	Endoplasmin
[1-2]	P14625	Oxidation	M	541	-	66	59.3	12.64	8.5e-23	524.251	2	1.1	IYFMAGSSR	Oxidation@4	MDA_143_FTMSms2hcd	24.951	1	45.4	8.5e-11	1	92469.6	HUMAN	Endoplasmin
[1-2]	P14625	Oxidation	M	622	-	66	59.3	12.64	8.5e-23	939.972	2	2.9	EAVEKEFEPLLNWMK	Oxidation@14	MDA_143_FTMSms2hcd	41.651	1	55.9	1.4e-12	1	92469.6	HUMAN	Endoplasmin
[1-3]	Q58FF7	Oxidation	M	336	-	47	34.7	9.61	3.5e-17	440.216	2	-0.14	EMLQQSK	Oxidation@2	MDA_143_FTMSms2hcd	10.339	1	25.8	5.8e-07	3	68325.4	HUMAN	Putative heat shock protein HSP 90-beta-3
[1-3]	Q58FF7	Oxidation	M	426	-	47	34.7	9.61	3.5e-17	459.421	5	0.75	EGLELPEDEEEKKKMEESK	Oxidation@15	MDA_143_FTMSms2hcd	22.412	1	61.5	7.5e-12	2	68325.4	HUMAN	Putative heat shock protein HSP 90-beta-3
[1-3]	Q58FF7	Oxidation	M	440	-	47	34.7	9.61	3.5e-17	503.287	2	1	LMKEILDK	Oxidation@2	MDA_143_FTMSms2hcd	19.808	1	33.8	0.00011	3	68325.4	HUMAN	Putative heat shock protein HSP 90-beta-3
[1-3]	Q58FF7	Oxidation	M	490	52	47	34.7	9.61	3.5e-17	640.753	2	1.7	DNSTMGYMMAK	Oxidation@5=52;Oxidation@8=10	MDA_143_FTMSms2hcd	19.583	2	41.9	1.3e-13	2	68325.4	HUMAN	Putative heat shock protein HSP 90-beta-3
[1-3]	Q58FF7	Oxidation	M	493	49	47	34.7	9.61	3.5e-17	640.752	2	0.9	DNSTMGYMMAK	Oxidation@8=49;Oxidation@9=49	MDA_143_FTMSms2hcd	18.827	1	43.2	3.6e-14	2	68325.4	HUMAN	Putative heat shock protein HSP 90-beta-3
[1-3]	Q58FF7	Oxidation	M	494	49	47	34.7	9.61	3.5e-17	640.752	2	0.9	DNSTMGYMMAK	Oxidation@8=49;Oxidation@9=49	MDA_143_FTMSms2hcd	18.827	1	43.2	3.6e-14	2	68325.4	HUMAN	Putative heat shock protein HSP 90-beta-3
[1-3]	Q58FF7	Phospho	S	205	-	47	34.7	9.61	3.5e-17	1053.77	3	2.3	EISDDEAEEEKGEKEEEDKDDEEKPK	Phospho@3	MDA_143_FTMSms2hcd	18.416	1	69.6	3.5e-17	2	68325.4	HUMAN	Putative heat shock protein HSP 90-beta-3
[1-3]	Q58FF7	Phospho	Y	492	21	47	34.7	9.61	3.5e-17	664.744	2	7	DNSTMGYMMAK	Phospho@7=21	MDA_143_FTMSms2hcd	16.222	1	20.6	1.9e-08	2	68325.4	HUMAN	Putative heat shock protein HSP 90-beta-3
[1-4]	Q12931	Oxidation	M	141	-	47	59.1	9.17	2.2e-16	780.391	3	1.2	LVSDGQALPEMEIHLQTNAEK	Oxidation@11	MDA_143_FTMSms2hcd	32.413	1	56.8	2.3e-12	1	80110.7	HUMAN	Heat shock protein 75 kDa, mitochondrial
[1-4]	Q12931	Oxidation	M	163	-	47	59.1	9.17	2.2e-16	1367.7	2	3.4	GTITIQDTGIGMTQEELVSNLGTIAR	Oxidation@12	MDA_143_FTMSms2hcd	47.09	1	78.6	2.2e-16	1	80110.7	HUMAN	Heat shock protein 75 kDa, mitochondrial
[1-4]	Q12931	Oxidation	M	300	100	47	59.1	9.17	2.2e-16	805.873	2	1.2	MNTLQAIWMMDPK	Oxidation@9=100;Oxidation@10=118	MDA_143_FTMSms2hcd	39.819	1	39.5	5.1e-12	1	80110.7	HUMAN	Heat shock protein 75 kDa, mitochondrial
[1-4]	Q12931	Oxidation	M	301	118	47	59.1	9.17	2.2e-16	805.873	2	1.2	MNTLQAIWMMDPK	Oxidation@9=100;Oxidation@10=118	MDA_143_FTMSms2hcd	39.819	1	39.5	5.1e-12	1	80110.7	HUMAN	Heat shock protein 75 kDa, mitochondrial
[1-4]	Q12931	Oxidation	M	348	-	47	59.1	9.17	2.2e-16	684.326	3	1.2	SIFYVPDMKPSMFDVSR	Oxidation@8;Oxidation@12	MDA_143_FTMSms2hcd	36.8	1	46	1.8e-11	1	80110.7	HUMAN	Heat shock protein 75 kDa, mitochondrial
[1-4]	Q12931	Oxidation	M	352	-	47	59.1	9.17	2.2e-16	684.326	3	1.2	SIFYVPDMKPSMFDVSR	Oxidation@8;Oxidation@12	MDA_143_FTMSms2hcd	36.8	1	46	1.8e-11	1	80110.7	HUMAN	Heat shock protein 75 kDa, mitochondrial
[1-4]	Q12931	Oxidation	M	448	-	47	59.1	9.17	2.2e-16	670.804	2	1.7	FFEDYGLFMR	Oxidation@9	MDA_143_FTMSms2hcd	40.989	1	49.4	9.6e-13	1	80110.7	HUMAN	Heat shock protein 75 kDa, mitochondrial
[1-4]	Q12931	Oxidation	M	517	-	47	59.1	9.17	2.2e-16	796.365	2	1.7	HLAEHSPYYEAMK	Oxidation@12	MDA_143_FTMSms2hcd	19.264	1	60.8	3.1e-15	1	80110.7	HUMAN	Heat shock protein 75 kDa, mitochondrial
[1-4]	Q12931	Oxidation	M	583	-	47	59.1	9.17	2.2e-16	664.287	2	0.32	ETEELMAWMR	Oxidation@6;Oxidation@9	MDA_143_FTMSms2hcd	28.796	1	43	1.3e-11	1	80110.7	HUMAN	Heat shock protein 75 kDa, mitochondrial
[1-4]	Q12931	Oxidation	M	586	-	47	59.1	9.17	2.2e-16	664.287	2	0.32	ETEELMAWMR	Oxidation@6;Oxidation@9	MDA_143_FTMSms2hcd	28.796	1	43	1.3e-11	1	80110.7	HUMAN	Heat shock protein 75 kDa, mitochondrial
[1-4]	Q12931	Oxidation	M	609	-	47	59.1	9.17	2.2e-16	922.458	2	2.4	LDTHPAMVTVLEMGAAR	Oxidation@7;Oxidation@13	MDA_143_FTMSms2hcd	29.939	1	51	6.6e-12	1	80110.7	HUMAN	Heat shock protein 75 kDa, mitochondrial
[1-4]	Q12931	Oxidation	M	615	-	47	59.1	9.17	2.2e-16	922.458	2	2.4	LDTHPAMVTVLEMGAAR	Oxidation@7;Oxidation@13	MDA_143_FTMSms2hcd	29.939	1	51	6.6e-12	1	80110.7	HUMAN	Heat shock protein 75 kDa, mitochondrial
[1-6]	Q58FF6	Acetyl	K	414	-	13	16.2	8.32	8.6e-15	878.759	3	5.8	KGFEVIYMSEPIDEYCVQQLK	Acetyl@1;Oxidation@8	MDA_143_FTMSms2hcd	39.361	1	17.9	0.0023	1	58264.9	HUMAN	Putative heat shock protein HSP 90-beta 4
[1-6]	Q58FF6	Met-loss	M	1	-	13	16.2	8.32	8.6e-15	650.352	2	1.7	MSLIINTFYSNK	Met-loss@1	MDA_143_FTMSms2hcd	37.56	1	40	2.3e-08	1	58264.9	HUMAN	Putative heat shock protein HSP 90-beta 4
[1-6]	Q58FF6	Oxidation	M	1	-	13	16.2	8.32	8.6e-15	723.869	2	1.2	MSLIINTFYSNK	Oxidation@1	MDA_143_FTMSms2hcd	38.229	1	25.9	2.1e-06	1	58264.9	HUMAN	Putative heat shock protein HSP 90-beta 4
[1-6]	Q58FF6	Oxidation	M	421	-	13	16.2	8.32	8.6e-15	878.759	3	5.8	KGFEVIYMSEPIDEYCVQQLK	Acetyl@1;Oxidation@8	MDA_143_FTMSms2hcd	39.361	1	17.9	0.0023	1	58264.9	HUMAN	Putative heat shock protein HSP 90-beta 4
[1-6]	Q58FF6	Oxidation	M	475	-	13	16.2	8.32	8.6e-15	503.287	2	1	LMKEILDK	Oxidation@2	MDA_143_FTMSms2hcd	19.808	1	33.8	0.00011	3	58264.9	HUMAN	Putative heat shock protein HSP 90-beta 4
[1-8]	Q58FG1	Oxidation	M	38	-	6	11.5	8.82	9.8e-16	683.37	2	2.1	TLTIVDTGIGMTK	Oxidation@11	MDA_143_FTMSms2hcd	34.467	1	55.9	1.4e-12	3	47712.3	HUMAN	Putative heat shock protein HSP 90-alpha A4
[1-8]	Q58FG1	Oxidation	M	298	-	6	11.5	8.82	9.8e-16	666.289	2	1.8	STYGWTANMER	Oxidation@9	MDA_143_FTMSms2hcd	24.383	1	42.4	9.8e-16	1	47712.3	HUMAN	Putative heat shock protein HSP 90-alpha A4
[1-9]	Q15397	Acetyl	K	55	-	7	12.2	5.57	1e-09	766.374	2	-7.2	VTSRNFEKSITK	Phospho@3=8;Acetyl@8	MDA_143_FTMSms2hcd	30.783	1	15.4	0.031	1	73585.1	HUMAN	Pumilio homolog 3
[1-9]	Q15397	Acetyl	K	196	-	7	12.2	5.57	1e-09	531.788	2	11	KQAFEELR	Acetyl@1	MDA_143_FTMSms2hcd	25.992	1	15.8	0.032	1	73585.1	HUMAN	Pumilio homolog 3
[1-9]	Q15397	Oxidation	M	159	-	7	12.2	5.57	1e-09	425.721	2	0.52	LMSDLQK	Oxidation@2	MDA_143_FTMSms2hcd	16.734	1	21.5	7.4e-06	1	73585.1	HUMAN	Pumilio homolog 3
[1-9]	Q15397	Phospho	S	50	8	7	12.2	5.57	1e-09	766.374	2	-7.2	VTSRNFEKSITK	Phospho@3=8;Acetyl@8	MDA_143_FTMSms2hcd	30.783	1	15.4	0.031	1	73585.1	HUMAN	Pumilio homolog 3
[2]	P55072	Gln->pyro-Glu	Q	714	-	75	62	10.18	3e-18	1077.98	2	1.2	QTNPSAMEVEEDDPVPEIR	Gln->pyro-Glu@1;Oxidation@7	MDA_143_FTMSms2hcd	36.78	1	59.8	3e-18	1	89322.6	HUMAN	Transitional endoplasmic reticulum ATPase
[2]	P55072	Met-loss+Acetyl	M	1	58	75	62	10.18	3e-18	564.288	3	0.21	MASGADSKGDDLSTAILK	Met-loss+Acetyl@1=58	MDA_143_FTMSms2hcd	33.078	1	59	8e-12	1	89322.6	HUMAN	Transitional endoplasmic reticulum ATPase
[2]	P55072	Oxidation	M	46	-	75	62	10.18	3e-18	534.264	2	1.2	MDELQLFR	Oxidation@1	MDA_143_FTMSms2hcd	35.388	1	34.3	4.5e-07	1	89322.6	HUMAN	Transitional endoplasmic reticulum ATPase
[2]	P55072	Oxidation	M	219	-	75	62	10.18	3e-18	501.768	2	0.08	EMVELPLR	Oxidation@2	MDA_143_FTMSms2hcd	32.211	1	26.2	1.6e-08	1	89322.6	HUMAN	Transitional endoplasmic reticulum ATPase
[2]	P55072	Oxidation	M	275	-	75	62	10.18	3e-18	1136.57	2	0.66	AVANETGAFFFLINGPEIMSK	Oxidation@19	MDA_143_FTMSms2hcd	51.492	1	69	1.2e-15	1	89322.6	HUMAN	Transitional endoplasmic reticulum ATPase
[2]	P55072	Oxidation	M	332	-	75	62	10.18	3e-18	534.98	3	0.82	RIVSQLLTLMDGLK	Oxidation@10	MDA_143_FTMSms2hcd	39.238	1	44	1.2e-10	1	89322.6	HUMAN	Transitional endoplasmic reticulum ATPase
[2]	P55072	Oxidation	M	344	-	75	62	10.18	3e-18	721.389	3	1.9	AHVIVMAATNRPNSIDPALR	Oxidation@6	MDA_143_FTMSms2hcd	28.597	1	50.5	4.3e-13	1	89322.6	HUMAN	Transitional endoplasmic reticulum ATPase
[2]	P55072	Oxidation	M	427	88	75	62	10.18	3e-18	848.153	4	3.2	KKMDLIDLEDETIDAEVMNSLAVTMDDFR	Oxidation@3=88;Oxidation@18=72	MDA_143_FTMSms2hcd	51.876	1	38.9	3.2e-12	1	89322.6	HUMAN	Transitional endoplasmic reticulum ATPase
[2]	P55072	Oxidation	M	442	72	75	62	10.18	3e-18	848.153	4	3.2	KKMDLIDLEDETIDAEVMNSLAVTMDDFR	Oxidation@3=88;Oxidation@18=72	MDA_143_FTMSms2hcd	51.876	1	38.9	3.2e-12	1	89322.6	HUMAN	Transitional endoplasmic reticulum ATPase
[2]	P55072	Oxidation	M	449	145	75	62	10.18	3e-18	1087.84	3	2.6	KMDLIDLEDETIDAEVMNSLAVTMDDFR	Oxidation@17=62;Oxidation@24=145	MDA_143_FTMSms2hcd	52.181	1	61.4	1.3e-16	1	89322.6	HUMAN	Transitional endoplasmic reticulum ATPase
[2]	P55072	Oxidation	M	508	-	75	62	10.18	3e-18	392.189	2	0.47	FGMTPSK	Oxidation@3	MDA_143_FTMSms2hcd	15.656	1	34.8	2.2e-08	1	89322.6	HUMAN	Transitional endoplasmic reticulum ATPase
[2]	P55072	Oxidation	M	550	-	75	62	10.18	3e-18	976.467	2	2.8	GPELLTMWFGESEANVR	Oxidation@7	MDA_143_FTMSms2hcd	46.705	1	63.4	3.8e-15	1	89322.6	HUMAN	Transitional endoplasmic reticulum ATPase
[2]	P55072	Oxidation	M	608	-	75	62	10.18	3e-18	856.417	2	1.4	VINQILTEMDGMSTK	Oxidation@9;Oxidation@12	MDA_143_FTMSms2hcd	29.195	1	52	4.5e-16	1	89322.6	HUMAN	Transitional endoplasmic reticulum ATPase
[2]	P55072	Oxidation	M	611	-	75	62	10.18	3e-18	856.417	2	1.4	VINQILTEMDGMSTK	Oxidation@9;Oxidation@12	MDA_143_FTMSms2hcd	29.195	1	52	4.5e-16	1	89322.6	HUMAN	Transitional endoplasmic reticulum ATPase
[2]	P55072	Oxidation	M	720	-	75	62	10.18	3e-18	1077.98	2	1.2	QTNPSAMEVEEDDPVPEIR	Gln->pyro-Glu@1;Oxidation@7	MDA_143_FTMSms2hcd	36.78	1	59.8	3e-18	1	89322.6	HUMAN	Transitional endoplasmic reticulum ATPase
[2]	P55072	Oxidation	M	740	-	75	62	10.18	3e-18	402.849	3	-0.65	RDHFEEAMR	Oxidation@8	MDA_143_FTMSms2hcd	14.037	1	38.1	1.6e-08	1	89322.6	HUMAN	Transitional endoplasmic reticulum ATPase
[2]	P55072	Oxidation	M	757	-	75	62	10.18	3e-18	823.404	2	0.88	KYEMFAQTLQQSR	Oxidation@4	MDA_143_FTMSms2hcd	26.089	1	53	6.2e-12	1	89322.6	HUMAN	Transitional endoplasmic reticulum ATPase
[3]	P55060	Gln->pyro-Glu	Q	110	-	68	48.7	9.69	2.5e-17	578.323	2	1.7	QLSDAISIIGR	Gln->pyro-Glu@1	MDA_143_FTMSms2hcd	46.174	2	44.6	8.6e-09	1	110418	HUMAN	Exportin-2
[3]	P55060	Oxidation	M	100	-	68	48.7	9.69	2.5e-17	912.491	2	3.1	ANIVHLMLSSPEQIQK	Oxidation@7	MDA_143_FTMSms2hcd	33.881	1	63.5	5.8e-13	1	110418	HUMAN	Exportin-2
[3]	P55060	Oxidation	M	134	-	68	48.7	9.69	2.5e-17	712.016	3	2.4	EDFPQKWPDLLTEMVNR	Oxidation@14	MDA_143_FTMSms2hcd	41.717	1	62.9	1.9e-16	1	110418	HUMAN	Exportin-2
[3]	P55060	Oxidation	M	352	-	68	48.7	9.69	2.5e-17	560.795	2	1.4	VIVPNMEFR	Oxidation@6	MDA_143_FTMSms2hcd	29.635	2	48.5	1.3e-08	1	110418	HUMAN	Exportin-2
[3]	P55060	Oxidation	M	412	-	68	48.7	9.69	2.5e-17	1300.62	2	0.37	FFEGPVTGIFSGYVNSMLQEYAK	Oxidation@17	MDA_143_FTMSms2hcd	51.342	1	70.8	2.5e-17	1	110418	HUMAN	Exportin-2
[3]	P55060	Oxidation	M	489	-	68	48.7	9.69	2.5e-17	429.731	2	0.35	YIMIFR	Oxidation@3	MDA_143_FTMSms2hcd	33.426	2	31.4	1.2e-05	1	110418	HUMAN	Exportin-2
[3]	P55060	Oxidation	M	532	-	68	48.7	9.69	2.5e-17	342.181	2	0.9	LFTMR	Oxidation@4	MDA_143_FTMSms2hcd	20.005	1	17.2	0.00037	1	110418	HUMAN	Exportin-2
[3]	P55060	Oxidation	M	573	-	68	48.7	9.69	2.5e-17	834.912	2	1.2	ALTLPGSSENEYIMK	Oxidation@14	MDA_143_FTMSms2hcd	33.476	2	57.1	7.9e-11	1	110418	HUMAN	Exportin-2
[3]	P55060	Oxidation	M	683	-	68	48.7	9.69	2.5e-17	881.455	3	2.5	NDIPSSYMALFPHLLQPVLWER	Oxidation@8	MDA_143_FTMSms2hcd	52.832	1	54.8	8.7e-11	1	110418	HUMAN	Exportin-2
[3]	P55060	Oxidation	M	758	-	68	48.7	9.69	2.5e-17	773.116	4	0.65	ANDHQGFYLLNSIIEHMPPESVDQYR	Oxidation@17	MDA_143_FTMSms2hcd	44.754	1	70.6	5.5e-14	1	110418	HUMAN	Exportin-2
[3]	P55060	Oxidation	M	817	-	68	48.7	9.69	2.5e-17	493.738	2	1.2	MFGMVLEK	Oxidation@1;Oxidation@4	MDA_143_FTMSms2hcd	26.128	1	33.1	2.4e-06	1	110418	HUMAN	Exportin-2
[3]	P55060	Oxidation	M	820	-	68	48.7	9.69	2.5e-17	493.738	2	1.2	MFGMVLEK	Oxidation@1;Oxidation@4	MDA_143_FTMSms2hcd	26.128	1	33.1	2.4e-06	1	110418	HUMAN	Exportin-2
[3]	P55060	Oxidation	M	920	-	68	48.7	9.69	2.5e-17	536.932	3	0.42	KEHDPVGQMVNNPK	Oxidation@9	MDA_143_FTMSms2hcd	15.76	1	44	8.3e-10	1	110418	HUMAN	Exportin-2
[3]	P55060	Phospho	S	4	19	68	48.7	9.69	2.5e-17	974.963	2	11	MELSDANLQTLTEYLK	Phospho@4=19	MDA_143_FTMSms2hcd	51.511	1	25.8	1.3e-06	1	110418	HUMAN	Exportin-2
[4]	P12814	Gln->pyro-Glu	Q	419	-	61	62.9	11.43	1.5e-20	754.878	2	0.96	QKDYETATLSEIK	Gln->pyro-Glu@1	MDA_143_FTMSms2hcd	31.557	1	37.1	1.9e-11	1	103058	HUMAN	Alpha-actinin-1
[4]	P12814	Gln->pyro-Glu	Q	634	-	61	62.9	11.43	1.5e-20	870.958	2	1.7	QFGAQANVIGPWIQTK	Gln->pyro-Glu@1	MDA_143_FTMSms2hcd	47.965	1	46	4.7e-11	1	103058	HUMAN	Alpha-actinin-1
[4]	P12814	Oxidation	M	66	-	61	62.9	11.43	1.5e-20	694.896	2	2	LMLLLEVISGER	Oxidation@2	MDA_143_FTMSms2hcd	48.672	1	43.5	7.9e-10	3	103058	HUMAN	Alpha-actinin-1
[4]	P12814	Oxidation	M	122	-	61	62.9	11.43	1.5e-20	740.407	2	0.62	MTLGMIWTIILR	Oxidation@1;Oxidation@5	MDA_143_FTMSms2hcd	53.452	1	51.2	6.6e-12	3	103058	HUMAN	Alpha-actinin-1
[4]	P12814	Oxidation	M	126	-	61	62.9	11.43	1.5e-20	740.407	2	0.62	MTLGMIWTIILR	Oxidation@1;Oxidation@5	MDA_143_FTMSms2hcd	53.452	1	51.2	6.6e-12	3	103058	HUMAN	Alpha-actinin-1
[4]	P12814	Oxidation	M	221	-	61	62.9	11.43	1.5e-20	888.429	2	1.8	MLDAEDIVGTARPDEK	Oxidation@1	MDA_143_FTMSms2hcd	30.588	1	62.4	5.3e-14	1	103058	HUMAN	Alpha-actinin-1
[4]	P12814	Oxidation	M	239	-	61	62.9	11.43	1.5e-20	1012.49	2	3.5	AIMTYVSSFYHAFSGAQK	Oxidation@3	MDA_143_FTMSms2hcd	41.758	1	58.4	1.5e-14	2	103058	HUMAN	Alpha-actinin-1
[4]	P12814	Oxidation	M	276	-	61	62.9	11.43	1.5e-20	1034.48	2	2	VLAVNQENEQLMEDYEK	Oxidation@12	MDA_143_FTMSms2hcd	30.248	1	68.8	1.5e-20	1	103058	HUMAN	Alpha-actinin-1
[4]	P12814	Oxidation	M	306	-	61	62.9	11.43	1.5e-20	482.555	3	-0.29	VPENTMHAMQQK	Oxidation@6;Oxidation@9	MDA_143_FTMSms2hcd	12.771	1	51.6	1.8e-10	1	103058	HUMAN	Alpha-actinin-1
[4]	P12814	Oxidation	M	309	-	61	62.9	11.43	1.5e-20	482.555	3	-0.29	VPENTMHAMQQK	Oxidation@6;Oxidation@9	MDA_143_FTMSms2hcd	12.771	1	51.6	1.8e-10	1	103058	HUMAN	Alpha-actinin-1
[4]	P12814	Oxidation	M	354	-	61	62.9	11.43	1.5e-20	493.246	3	1.2	LSNRPAFMPSEGR	Oxidation@8	MDA_143_FTMSms2hcd	22.321	1	48.4	2.2e-09	1	103058	HUMAN	Alpha-actinin-1
[4]	P12814	Oxidation	M	650	-	61	62.9	11.43	1.5e-20	375.675	2	-2.3	MEEIGR	Oxidation@1	MDA_143_FTMSms2hcd	14.185	1	20.6	0.002	2	103058	HUMAN	Alpha-actinin-1
[4]	P12814	Oxidation	M	660	-	61	62.9	11.43	1.5e-20	665.671	3	0.72	ISIEMHGTLEDQLSHLR	Oxidation@5	MDA_143_FTMSms2hcd	34.725	1	62.5	3.7e-13	1	103058	HUMAN	Alpha-actinin-1
[4]	P12814	Oxidation	M	710	-	61	62.9	11.43	1.5e-20	439.872	3	0.31	HTNYTMEHIR	Oxidation@6	MDA_143_FTMSms2hcd	15.802	1	40.6	1.8e-10	3	103058	HUMAN	Alpha-actinin-1
[4]	P12814	Oxidation	M	748	-	61	62.9	11.43	1.5e-20	677.807	2	1.4	GISQEQMNEFR	Oxidation@7	MDA_143_FTMSms2hcd	22.449	1	48.9	5.2e-11	1	103058	HUMAN	Alpha-actinin-1
[4]	P12814	Oxidation	M	796	-	61	62.9	11.43	1.5e-20	530.777	2	0.54	IMSIVDPNR	Oxidation@2	MDA_143_FTMSms2hcd	24.634	1	28.1	6.6e-07	1	103058	HUMAN	Alpha-actinin-1
[4]	P12814	Oxidation	M	830	-	61	62.9	11.43	1.5e-20	873.382	2	1.9	ETADTDTADQVMASFK	Oxidation@12	MDA_143_FTMSms2hcd	27.873	1	57.1	4.6e-17	1	103058	HUMAN	Alpha-actinin-1
[4]	P12814	Oxidation	M	845	-	61	62.9	11.43	1.5e-20	589.971	3	1.9	ILAGDKNYITMDELR	Oxidation@11	MDA_143_FTMSms2hcd	30.365	1	45.9	1.9e-12	1	103058	HUMAN	Alpha-actinin-1
[4]	P12814	Oxidation	M	864	-	61	62.9	11.43	1.5e-20	1029.79	3	1.6	MAPYTGPDSVPGALDYMSFSTALYGESDL	Oxidation@1;Oxidation@17	MDA_143_FTMSms2hcd	50.531	1	23.7	1.1e-06	1	103058	HUMAN	Alpha-actinin-1
[4]	P12814	Oxidation	M	880	-	61	62.9	11.43	1.5e-20	1029.79	3	1.6	MAPYTGPDSVPGALDYMSFSTALYGESDL	Oxidation@1;Oxidation@17	MDA_143_FTMSms2hcd	50.531	1	23.7	1.1e-06	1	103058	HUMAN	Alpha-actinin-1
[4-1]	O43707	Gln->pyro-Glu	Q	522	-	61	65.2	10.95	1.1e-19	827.429	2	1.9	QLEAIDQLHLEYAK	Gln->pyro-Glu@1	MDA_143_FTMSms2hcd	44.123	1	59.1	1.6e-10	1	104855	HUMAN	Alpha-actinin-4
[4-1]	O43707	Gln->pyro-Glu	Q	644	-	61	65.2	10.95	1.1e-19	497.738	2	-0.36	QQSNEHLR	Gln->pyro-Glu@1	MDA_143_FTMSms2hcd	15.025	1	26.3	1.5e-07	1	104855	HUMAN	Alpha-actinin-4
[4-1]	O43707	Gln->pyro-Glu	Q	653	-	61	65.2	10.95	1.1e-19	878.957	2	2.3	QFASQANVVGPWIQTK	Gln->pyro-Glu@1	MDA_143_FTMSms2hcd	45.136	1	44.4	4.8e-10	1	104855	HUMAN	Alpha-actinin-4
[4-1]	O43707	Oxidation	M	85	-	61	65.2	10.95	1.1e-19	694.896	2	2	LMLLLEVISGER	Oxidation@2	MDA_143_FTMSms2hcd	48.672	1	43.5	7.9e-10	3	104855	HUMAN	Alpha-actinin-4
[4-1]	O43707	Oxidation	M	141	-	61	65.2	10.95	1.1e-19	740.407	2	0.62	MTLGMIWTIILR	Oxidation@1;Oxidation@5	MDA_143_FTMSms2hcd	53.452	1	51.2	6.6e-12	3	104855	HUMAN	Alpha-actinin-4
[4-1]	O43707	Oxidation	M	145	-	61	65.2	10.95	1.1e-19	740.407	2	0.62	MTLGMIWTIILR	Oxidation@1;Oxidation@5	MDA_143_FTMSms2hcd	53.452	1	51.2	6.6e-12	3	104855	HUMAN	Alpha-actinin-4
[4-1]	O43707	Oxidation	M	240	-	61	65.2	10.95	1.1e-19	611.629	3	1.3	MLDAEDIVNTARPDEK	Oxidation@1	MDA_143_FTMSms2hcd	31.506	2	47.5	3.6e-10	1	104855	HUMAN	Alpha-actinin-4
[4-1]	O43707	Oxidation	M	258	-	61	65.2	10.95	1.1e-19	1012.49	2	3.5	AIMTYVSSFYHAFSGAQK	Oxidation@3	MDA_143_FTMSms2hcd	41.758	1	58.4	1.5e-14	2	104855	HUMAN	Alpha-actinin-4
[4-1]	O43707	Oxidation	M	295	-	61	65.2	10.95	1.1e-19	692.991	3	1.7	VLAVNQENEHLMEDYEK	Oxidation@12	MDA_143_FTMSms2hcd	26.788	1	67.2	1.7e-17	1	104855	HUMAN	Alpha-actinin-4
[4-1]	O43707	Oxidation	M	373	-	61	65.2	10.95	1.1e-19	483.911	3	1.6	LSNRPAFMPSEGK	Oxidation@8	MDA_143_FTMSms2hcd	21.542	1	47.6	4.1e-08	2	104855	HUMAN	Alpha-actinin-4
[4-1]	O43707	Oxidation	M	669	-	61	65.2	10.95	1.1e-19	375.675	2	-2.3	MEEIGR	Oxidation@1	MDA_143_FTMSms2hcd	14.185	1	20.6	0.002	2	104855	HUMAN	Alpha-actinin-4
[4-1]	O43707	Oxidation	M	679	-	61	65.2	10.95	1.1e-19	648.663	3	0.71	ISIEMNGTLEDQLSHLK	Oxidation@5	MDA_143_FTMSms2hcd	38.046	1	51.3	1.7e-11	1	104855	HUMAN	Alpha-actinin-4
[4-1]	O43707	Oxidation	M	729	-	61	65.2	10.95	1.1e-19	439.872	3	0.31	HTNYTMEHIR	Oxidation@6	MDA_143_FTMSms2hcd	15.802	1	40.6	1.8e-10	3	104855	HUMAN	Alpha-actinin-4
[4-1]	O43707	Oxidation	M	767	-	61	65.2	10.95	1.1e-19	684.815	2	1.2	GISQEQMQEFR	Oxidation@7	MDA_143_FTMSms2hcd	22.387	1	44.8	2.3e-10	1	104855	HUMAN	Alpha-actinin-4
[4-1]	O43707	Oxidation	M	883	-	61	65.2	10.95	1.1e-19	904.931	2	1.7	MAPYQGPDAVPGALDYK	Oxidation@1	MDA_143_FTMSms2hcd	33.855	1	53.8	2.9e-11	1	104855	HUMAN	Alpha-actinin-4
[4-2]	P35609	Oxidation	M	73	-	17	16.8	8.95	5.8e-16	694.896	2	2	LMLLLEVISGER	Oxidation@2	MDA_143_FTMSms2hcd	48.672	1	43.5	7.9e-10	3	103855	HUMAN	Alpha-actinin-2
[4-2]	P35609	Oxidation	M	129	-	17	16.8	8.95	5.8e-16	740.407	2	0.62	MTLGMIWTIILR	Oxidation@1;Oxidation@5	MDA_143_FTMSms2hcd	53.452	1	51.2	6.6e-12	3	103855	HUMAN	Alpha-actinin-2
[4-2]	P35609	Oxidation	M	133	-	17	16.8	8.95	5.8e-16	740.407	2	0.62	MTLGMIWTIILR	Oxidation@1;Oxidation@5	MDA_143_FTMSms2hcd	53.452	1	51.2	6.6e-12	3	103855	HUMAN	Alpha-actinin-2
[4-2]	P35609	Oxidation	M	361	-	17	16.8	8.95	5.8e-16	483.911	3	1.6	ISNRPAFMPSEGK	Oxidation@8	MDA_143_FTMSms2hcd	21.542	1	47.6	4.1e-08	2	103855	HUMAN	Alpha-actinin-2
[4-2]	P35609	Oxidation	M	717	-	17	16.8	8.95	5.8e-16	439.872	3	0.31	HTNYTMEHIR	Oxidation@6	MDA_143_FTMSms2hcd	15.802	1	40.6	1.8e-10	3	103855	HUMAN	Alpha-actinin-2
[4-3]	Q6PKG0	Met-loss+Acetyl	M	1	-	6	7.7	7.2	1e-12	866.804	3	4	MATQVEPLLPGGATLLQAEEHGGLVR	Met-loss+Acetyl@1	MDA_143_FTMSms2hcd	49.324	1	56.3	8.5e-11	1	123511	HUMAN	La-related protein 1
[4-3]	Q6PKG0	Oxidation	M	430	-	6	7.7	7.2	1e-12	640.663	3	2.4	MDADGFLPITLIASFHR	Oxidation@1	MDA_143_FTMSms2hcd	52.368	1	44	1.3e-10	1	123511	HUMAN	La-related protein 1
[5]	Q13200	Oxidation	M	58	-	60	57.3	9.78	1.6e-17	834.643	4	1.6	DAGDKDKEQELSEEDKQLQDELEMLVER	Oxidation@24	MDA_143_FTMSms2hcd	46.018	1	71.9	2.5e-15	1	100201	HUMAN	26S proteasome non-ATPase regulatory subunit 2
[5]	Q13200	Oxidation	M	89	-	60	57.3	9.78	1.6e-17	740.391	2	2	SSTTSMTSVPKPLK	Oxidation@6	MDA_143_FTMSms2hcd	21.519	1	50	4.5e-13	1	100201	HUMAN	26S proteasome non-ATPase regulatory subunit 2
[5]	Q13200	Oxidation	M	113	-	60	57.3	9.78	1.6e-17	551.271	3	0.029	LKEIYENMAPGENK	Oxidation@8	MDA_143_FTMSms2hcd	22.333	1	31.1	9.3e-07	1	100201	HUMAN	26S proteasome non-ATPase regulatory subunit 2
[5]	Q13200	Oxidation	M	131	-	60	57.3	9.78	1.6e-17	615.305	3	4	FAADIISVLAMTMSGER	Oxidation@11;Oxidation@13	MDA_143_FTMSms2hcd	48.351	1	43.8	3.2e-12	1	100201	HUMAN	26S proteasome non-ATPase regulatory subunit 2
[5]	Q13200	Oxidation	M	133	-	60	57.3	9.78	1.6e-17	615.305	3	4	FAADIISVLAMTMSGER	Oxidation@11;Oxidation@13	MDA_143_FTMSms2hcd	48.351	1	43.8	3.2e-12	1	100201	HUMAN	26S proteasome non-ATPase regulatory subunit 2
[5]	Q13200	Oxidation	M	294	23	60	57.3	9.78	1.6e-17	485.236	2	0.88	QMAFMLGR	Oxidation@2=23	MDA_143_FTMSms2hcd	29.627	1	22.4	0.002	1	100201	HUMAN	26S proteasome non-ATPase regulatory subunit 2
[5]	Q13200	Oxidation	M	340	-	60	57.3	9.78	1.6e-17	495.745	2	1.1	ELDIMEPK	Oxidation@5	MDA_143_FTMSms2hcd	25.546	1	35.9	7.9e-07	1	100201	HUMAN	26S proteasome non-ATPase regulatory subunit 2
[5]	Q13200	Oxidation	M	370	-	60	57.3	9.78	1.6e-17	711.676	3	2.8	MNLASSFVNGFVNAAFGQDK	Oxidation@1	MDA_143_FTMSms2hcd	51.979	1	48.2	8.3e-12	1	100201	HUMAN	26S proteasome non-ATPase regulatory subunit 2
[5]	Q13200	Oxidation	M	407	-	60	57.3	9.78	1.6e-17	801.155	4	2.3	NKDHGMLSAAASLGMILLWDVDGGLTQIDK	Oxidation@6;Oxidation@15	MDA_143_FTMSms2hcd	54.803	1	56	4.7e-12	1	100201	HUMAN	26S proteasome non-ATPase regulatory subunit 2
[5]	Q13200	Oxidation	M	416	-	60	57.3	9.78	1.6e-17	801.155	4	2.3	NKDHGMLSAAASLGMILLWDVDGGLTQIDK	Oxidation@6;Oxidation@15	MDA_143_FTMSms2hcd	54.803	1	56	4.7e-12	1	100201	HUMAN	26S proteasome non-ATPase regulatory subunit 2
[5]	Q13200	Oxidation	M	505	-	60	57.3	9.78	1.6e-17	1074.91	3	1.2	LGSIFGLGLAYAGSNREDVLTLLLPVMGDSK	Oxidation@27	MDA_143_FTMSms2hcd	56.907	1	53.2	2.8e-13	1	100201	HUMAN	26S proteasome non-ATPase regulatory subunit 2
[5]	Q13200	Oxidation	M	729	-	60	57.3	9.78	1.6e-17	1002.77	3	2	FSHDADPEVSYNSIFAMGMVGSGTNNAR	Oxidation@17;Oxidation@19	MDA_143_FTMSms2hcd	36.068	1	63.5	1.6e-17	1	100201	HUMAN	26S proteasome non-ATPase regulatory subunit 2
[5]	Q13200	Oxidation	M	731	-	60	57.3	9.78	1.6e-17	1002.77	3	2	FSHDADPEVSYNSIFAMGMVGSGTNNAR	Oxidation@17;Oxidation@19	MDA_143_FTMSms2hcd	36.068	1	63.5	1.6e-17	1	100201	HUMAN	26S proteasome non-ATPase regulatory subunit 2
[5]	Q13200	Oxidation	M	744	-	60	57.3	9.78	1.6e-17	345.702	2	0.31	LAAMLR	Oxidation@4	MDA_143_FTMSms2hcd	20.325	1	28.8	1.2e-05	1	100201	HUMAN	26S proteasome non-ATPase regulatory subunit 2
[5]	Q13200	Oxidation	M	761	-	60	57.3	9.78	1.6e-17	561.274	2	0.46	DPNNLFMVR	Oxidation@7	MDA_143_FTMSms2hcd	32.497	1	33.1	6.5e-09	1	100201	HUMAN	26S proteasome non-ATPase regulatory subunit 2
[5]	Q13200	Oxidation	M	825	-	60	57.3	9.78	1.6e-17	860.947	2	1.5	SHYVLYGLVAAMQPR	Oxidation@12	MDA_143_FTMSms2hcd	36.314	1	61.1	7.5e-14	1	100201	HUMAN	26S proteasome non-ATPase regulatory subunit 2
[5]	Q13200	Oxidation	M	829	-	60	57.3	9.78	1.6e-17	1009.04	2	1.9	MLVTFDEELRPLPVSVR	Oxidation@1	MDA_143_FTMSms2hcd	42.111	1	56	1.9e-13	1	100201	HUMAN	26S proteasome non-ATPase regulatory subunit 2
[5]	Q13200	Phospho	S	16	57	60	57.3	9.78	1.6e-17	847.739	3	2.2	DKAPVQPQQSPAAAPGGTDEKPSGK	Phospho@10=57	MDA_143_FTMSms2hcd	20.708	1	64.9	1.6e-12	1	100201	HUMAN	26S proteasome non-ATPase regulatory subunit 2
[6]	P11142	Gln->pyro-Glu	Q	424	-	57	62.5	9.78	1.7e-17	1379.16	2	4.5	QTQTFTTYSDNQPGVLIQVYEGER	Gln->pyro-Glu@1	MDA_143_FTMSms2hcd	46.283	1	68.3	2e-17	1	70898.7	HUMAN	Heat shock cognate 71 kDa protein
[6]	P11142	Oxidation	M	61	-	57	62.5	9.78	1.7e-17	833.399	2	0.86	NQVAMNPTNTVFDAK	Oxidation@5	MDA_143_FTMSms2hcd	28.693	1	51.5	1.1e-12	1	70898.7	HUMAN	Heat shock cognate 71 kDa protein
[6]	P11142	Oxidation	M	87	-	57	62.5	9.78	1.7e-17	713.836	2	0.85	RFDDAVVQSDMK	Oxidation@11	MDA_143_FTMSms2hcd	21.814	1	51.5	4.4e-13	1	70898.7	HUMAN	Heat shock cognate 71 kDa protein
[6]	P11142	Oxidation	M	93	-	57	62.5	9.78	1.7e-17	616.301	5	0.93	RFDDAVVQSDMKHWPFMVVNDAGRPK	Oxidation@11;Oxidation@17	MDA_143_FTMSms2hcd	33.9	1	66.3	1e-14	1	70898.7	HUMAN	Heat shock cognate 71 kDa protein
[6]	P11142	Oxidation	M	122	-	57	62.5	9.78	1.7e-17	816.895	2	0.47	SFYPEEVSSMVLTK	Oxidation@10	MDA_143_FTMSms2hcd	36.749	1	58.5	3.2e-12	1	70898.7	HUMAN	Heat shock cognate 71 kDa protein
[6]	P11142	Oxidation	M	127	-	57	62.5	9.78	1.7e-17	634.831	2	0.018	MKEIAEAYLGK	Oxidation@1	MDA_143_FTMSms2hcd	25.099	2	46	1.9e-10	1	70898.7	HUMAN	Heat shock cognate 71 kDa protein
[6]	P11142	Oxidation	M	237	-	57	62.5	9.78	1.7e-17	626.314	2	1.3	MVNHFIAEFK	Oxidation@1	MDA_143_FTMSms2hcd	30.358	1	47.1	1.1e-09	1	70898.7	HUMAN	Heat shock cognate 71 kDa protein
[6]	P11142	Oxidation	M	518	-	57	62.5	9.78	1.7e-17	571.281	2	-0.41	MVQEAEKYK	Oxidation@1	MDA_143_FTMSms2hcd	14.604	1	42.1	6.7e-09	3	70898.7	HUMAN	Heat shock cognate 71 kDa protein
[6]	P11142	Oxidation	M	549	-	57	62.5	9.78	1.7e-17	660.301	2	0.68	NSLESYAFNMK	Oxidation@10	MDA_143_FTMSms2hcd	29.949	1	44	2.7e-12	1	70898.7	HUMAN	Heat shock cognate 71 kDa protein
[6]	P11142	Oxidation	M	617	-	57	62.5	9.78	1.7e-17	1126.84	3	1.4	LYQSAGGMPGGMPGGFPGGGAPPSGGASSGPTIEEVD	Oxidation@8;Oxidation@12	MDA_143_FTMSms2hcd	37.464	1	23.8	2.9e-06	1	70898.7	HUMAN	Heat shock cognate 71 kDa protein
[6]	P11142	Oxidation	M	621	-	57	62.5	9.78	1.7e-17	1126.84	3	1.4	LYQSAGGMPGGMPGGFPGGGAPPSGGASSGPTIEEVD	Oxidation@8;Oxidation@12	MDA_143_FTMSms2hcd	37.464	1	23.8	2.9e-06	1	70898.7	HUMAN	Heat shock cognate 71 kDa protein
[6-1]	P0DMV8	Gln->pyro-Glu	Q	424	-	43	53.2	11.45	1.3e-20	1385.18	2	2.6	QTQIFTTYSDNQPGVLIQVYEGER	Gln->pyro-Glu@1	MDA_143_FTMSms2hcd	49.957	1	67.3	3.9e-16	3	70052.8	HUMAN	Heat shock 70 kDa protein 1A
[6-1]	P0DMV8	Oxidation	M	87	-	43	53.2	11.45	1.3e-20	683.838	2	1.3	KFGDPVVQSDMK	Oxidation@11	MDA_143_FTMSms2hcd	21.941	1	50.5	1e-11	2	70052.8	HUMAN	Heat shock 70 kDa protein 1A
[6-1]	P0DMV8	Oxidation	M	122	-	43	53.2	11.45	1.3e-20	544.273	3	1.3	AFYPEEISSMVLTK	Oxidation@10	MDA_143_FTMSms2hcd	39.78	2	50.2	5.4e-14	3	70052.8	HUMAN	Heat shock 70 kDa protein 1A
[6-1]	P0DMV8	Oxidation	M	127	-	43	53.2	11.45	1.3e-20	1092.88	3	0.92	MKEIAEAYLGYPVTNAVITVPAYFNDSQR	Oxidation@1	MDA_143_FTMSms2hcd	47.367	1	61.4	5.9e-15	2	70052.8	HUMAN	Heat shock 70 kDa protein 1A
[6-1]	P0DMV8	Oxidation	M	381	-	43	53.2	11.45	1.3e-20	1160.58	2	1.8	SINPDEAVAYGAAVQAAILMGDK	Oxidation@20	MDA_143_FTMSms2hcd	49.402	1	67.5	1.3e-20	3	70052.8	HUMAN	Heat shock 70 kDa protein 1A
[6-1]	P0DMV8	Oxidation	M	518	-	43	53.2	11.45	1.3e-20	571.281	2	-0.41	MVQEAEKYK	Oxidation@1	MDA_143_FTMSms2hcd	14.604	1	42.1	6.7e-09	3	70052.8	HUMAN	Heat shock 70 kDa protein 1A
[6-1]	P0DMV8	Oxidation	M	549	-	43	53.2	11.45	1.3e-20	652.304	2	1.4	NALESYAFNMK	Oxidation@10	MDA_143_FTMSms2hcd	30.641	1	46.3	3.1e-14	3	70052.8	HUMAN	Heat shock 70 kDa protein 1A
[6-1]	P0DMV8	Phospho	T	66	-	43	53.2	11.45	1.3e-20	641.576	4	-7.4	LIGDAAKNQVALNPQNTVFDAKR	Phospho@17	MDA_143_FTMSms2hcd	42.524	1	15.8	0.0085	2	70052.8	HUMAN	Heat shock 70 kDa protein 1A
[6-2]	P0DMV9	Gln->pyro-Glu	Q	424	-	43	53.2	11.45	1.3e-20	1385.18	2	2.6	QTQIFTTYSDNQPGVLIQVYEGER	Gln->pyro-Glu@1	MDA_143_FTMSms2hcd	49.957	1	67.3	3.9e-16	3	70052.8	HUMAN	Heat shock 70 kDa protein 1B
[6-2]	P0DMV9	Oxidation	M	87	-	43	53.2	11.45	1.3e-20	683.838	2	1.3	KFGDPVVQSDMK	Oxidation@11	MDA_143_FTMSms2hcd	21.941	1	50.5	1e-11	2	70052.8	HUMAN	Heat shock 70 kDa protein 1B
[6-2]	P0DMV9	Oxidation	M	122	-	43	53.2	11.45	1.3e-20	544.273	3	1.3	AFYPEEISSMVLTK	Oxidation@10	MDA_143_FTMSms2hcd	39.78	2	50.2	5.4e-14	3	70052.8	HUMAN	Heat shock 70 kDa protein 1B
[6-2]	P0DMV9	Oxidation	M	127	-	43	53.2	11.45	1.3e-20	1092.88	3	0.92	MKEIAEAYLGYPVTNAVITVPAYFNDSQR	Oxidation@1	MDA_143_FTMSms2hcd	47.367	1	61.4	5.9e-15	2	70052.8	HUMAN	Heat shock 70 kDa protein 1B
[6-2]	P0DMV9	Oxidation	M	381	-	43	53.2	11.45	1.3e-20	1160.58	2	1.8	SINPDEAVAYGAAVQAAILMGDK	Oxidation@20	MDA_143_FTMSms2hcd	49.402	1	67.5	1.3e-20	3	70052.8	HUMAN	Heat shock 70 kDa protein 1B
[6-2]	P0DMV9	Oxidation	M	518	-	43	53.2	11.45	1.3e-20	571.281	2	-0.41	MVQEAEKYK	Oxidation@1	MDA_143_FTMSms2hcd	14.604	1	42.1	6.7e-09	3	70052.8	HUMAN	Heat shock 70 kDa protein 1B
[6-2]	P0DMV9	Oxidation	M	549	-	43	53.2	11.45	1.3e-20	652.304	2	1.4	NALESYAFNMK	Oxidation@10	MDA_143_FTMSms2hcd	30.641	1	46.3	3.1e-14	3	70052.8	HUMAN	Heat shock 70 kDa protein 1B
[6-2]	P0DMV9	Phospho	T	66	-	43	53.2	11.45	1.3e-20	641.576	4	-7.4	LIGDAAKNQVALNPQNTVFDAKR	Phospho@17	MDA_143_FTMSms2hcd	42.524	1	15.8	0.0085	2	70052.8	HUMAN	Heat shock 70 kDa protein 1B
[6-3]	P11021	Oxidation	M	148	-	35	52.4	8.72	1.6e-15	776.901	2	1.3	TFAPEEISAMVLTK	Oxidation@10	MDA_143_FTMSms2hcd	39.807	1	60.9	7.3e-12	1	72333.5	HUMAN	Endoplasmic reticulum chaperone BiP
[6-3]	P11021	Oxidation	M	153	-	35	52.4	8.72	1.6e-15	628.814	2	2.1	MKETAEAYLGK	Oxidation@1	MDA_143_FTMSms2hcd	21.49	1	35	5e-08	1	72333.5	HUMAN	Endoplasmic reticulum chaperone BiP
[6-3]	P11021	Oxidation	M	196	-	35	52.4	8.72	1.6e-15	617.317	2	1.6	DAGTIAGLNVMR	Oxidation@11	MDA_143_FTMSms2hcd	30.023	1	36.9	1.3e-10	1	72333.5	HUMAN	Endoplasmic reticulum chaperone BiP
[6-3]	P11021	Oxidation	M	263	-	35	52.4	8.72	1.6e-15	307.162	3	0.59	VMEHFIK	Oxidation@2	MDA_143_FTMSms2hcd	20.195	1	24.9	6.6e-07	1	72333.5	HUMAN	Endoplasmic reticulum chaperone BiP
[6-3]	P11021	Oxidation	M	332	-	35	52.4	8.72	1.6e-15	764.879	2	3.2	AKFEELNMDLFR	Oxidation@8	MDA_143_FTMSms2hcd	35.32	1	38.9	5.3e-10	1	72333.5	HUMAN	Endoplasmic reticulum chaperone BiP
[6-4]	P38646	Acetyl	K	595	-	33	46.5	8.52	3.5e-15	860.403	3	-2.8	VEAVNMAEGIIHDTETKMEEFK	Acetyl@17;Oxidation@18=46	MDA_143_FTMSms2hcd	49.208	1	17.6	0.00067	1	73681.1	HUMAN	Stress-70 protein, mitochondrial
[6-4]	P38646	Oxidation	M	103	-	33	46.5	8.52	3.5e-15	366.21	2	-0.14	LVGMPAK	Oxidation@4	MDA_143_FTMSms2hcd	16.045	1	20.5	0.0015	1	73681.1	HUMAN	Stress-70 protein, mitochondrial
[6-4]	P38646	Oxidation	M	172	-	33	46.5	8.52	3.5e-15	785.422	2	0.89	LYSPSQIGAFVLMK	Oxidation@13	MDA_143_FTMSms2hcd	44.2	1	60.3	1.4e-12	1	73681.1	HUMAN	Stress-70 protein, mitochondrial
[6-4]	P38646	Oxidation	M	174	-	33	46.5	8.52	3.5e-15	536.928	3	1.4	MKETAENYLGHTAK	Oxidation@1	MDA_143_FTMSms2hcd	19.514	1	44	1.8e-10	1	73681.1	HUMAN	Stress-70 protein, mitochondrial
[6-4]	P38646	Oxidation	M	389	-	33	46.5	8.52	3.5e-15	731.883	2	1	SDIGEVILVGGMTR	Oxidation@12	MDA_143_FTMSms2hcd	37.252	1	52	2.6e-13	1	73681.1	HUMAN	Stress-70 protein, mitochondrial
[6-4]	P38646	Oxidation	M	561	-	33	46.5	8.52	3.5e-15	812.077	3	1.9	EQQIVIQSSGGLSKDDIENMVK	Oxidation@20	MDA_143_FTMSms2hcd	31.762	1	64.8	5.3e-15	1	73681.1	HUMAN	Stress-70 protein, mitochondrial
[6-4]	P38646	Oxidation	M	584	-	33	46.5	8.52	3.5e-15	624.973	3	2.6	VEAVNMAEGIIHDTETK	Oxidation@6	MDA_143_FTMSms2hcd	31.705	1	44.9	4.9e-10	1	73681.1	HUMAN	Stress-70 protein, mitochondrial
[6-4]	P38646	Oxidation	M	596	46	33	46.5	8.52	3.5e-15	860.403	3	-2.8	VEAVNMAEGIIHDTETKMEEFK	Acetyl@17;Oxidation@18=46	MDA_143_FTMSms2hcd	49.208	1	17.6	0.00067	1	73681.1	HUMAN	Stress-70 protein, mitochondrial
[6-4]	P38646	Oxidation	M	650	-	33	46.5	8.52	3.5e-15	459.226	2	0.44	LFEMAYK	Oxidation@4	MDA_143_FTMSms2hcd	25.01	1	26.6	1.4e-07	1	73681.1	HUMAN	Stress-70 protein, mitochondrial
[6-5]	P34931	Gln->pyro-Glu	Q	426	-	21	30.4	11.45	1.3e-20	1385.18	2	2.6	QTQIFTTYSDNQPGVLIQVYEGER	Gln->pyro-Glu@1	MDA_143_FTMSms2hcd	49.957	1	67.3	3.9e-16	3	70375.6	HUMAN	Heat shock 70 kDa protein 1-like
[6-5]	P34931	Oxidation	M	124	-	21	30.4	11.45	1.3e-20	544.273	3	1.3	AFYPEEISSMVLTK	Oxidation@10	MDA_143_FTMSms2hcd	39.78	2	50.2	5.4e-14	3	70375.6	HUMAN	Heat shock 70 kDa protein 1-like
[6-5]	P34931	Oxidation	M	383	-	21	30.4	11.45	1.3e-20	1160.58	2	1.8	SINPDEAVAYGAAVQAAILMGDK	Oxidation@20	MDA_143_FTMSms2hcd	49.402	1	67.5	1.3e-20	3	70375.6	HUMAN	Heat shock 70 kDa protein 1-like
[6-5]	P34931	Oxidation	M	551	-	21	30.4	11.45	1.3e-20	652.304	2	1.4	NALESYAFNMK	Oxidation@10	MDA_143_FTMSms2hcd	30.641	1	46.3	3.1e-14	3	70375.6	HUMAN	Heat shock 70 kDa protein 1-like
[6-6]	P54652	Acetyl	K	129	-	26	39.3	8.24	1.2e-14	1093.55	3	-9.2	MKEIAEAYLGGKVHSAVITVPAYFNDSQR	Acetyl@2;Acetyl@12	MDA_143_FTMSms2hcd	46.115	1	35.1	2.8e-08	1	70021.5	HUMAN	Heat shock-related 70 kDa protein 2
[6-6]	P54652	Acetyl	K	139	-	26	39.3	8.24	1.2e-14	1093.55	3	-9.2	MKEIAEAYLGGKVHSAVITVPAYFNDSQR	Acetyl@2;Acetyl@12	MDA_143_FTMSms2hcd	46.115	1	35.1	2.8e-08	1	70021.5	HUMAN	Heat shock-related 70 kDa protein 2
[6-6]	P54652	Gln->pyro-Glu	Q	554	-	26	39.3	8.24	1.2e-14	367.528	3	11	QTVEDEKLR	Gln->pyro-Glu@1	MDA_143_FTMSms2hcd	22.553	1	23.8	0.0046	1	70021.5	HUMAN	Heat shock-related 70 kDa protein 2
[6-6]	P54652	Oxidation	M	62	-	26	39.3	8.24	1.2e-14	840.408	2	1.3	NQVAMNPTNTIFDAK	Oxidation@5	MDA_143_FTMSms2hcd	31.615	1	45	3.4e-11	1	70021.5	HUMAN	Heat shock-related 70 kDa protein 2
[6-6]	P54652	Oxidation	M	123	-	26	39.3	8.24	1.2e-14	822.915	2	2.9	TFFPEEISSMVLTK	Oxidation@10	MDA_143_FTMSms2hcd	43.057	1	50	7.2e-11	1	70021.5	HUMAN	Heat shock-related 70 kDa protein 2
[6-6]	P54652	Oxidation	M	589	-	26	39.3	8.24	1.2e-14	513.225	3	0.32	NQMAEKDEYEHK	Oxidation@3	MDA_143_FTMSms2hcd	12.59	1	24.5	8.7e-09	1	70021.5	HUMAN	Heat shock-related 70 kDa protein 2
[7]	P33991	Gln->pyro-Glu	Q	114	-	59	54.3	8.96	5.6e-16	541.784	2	1.3	QRPDLGSAQK	Gln->pyro-Glu@1	MDA_143_FTMSms2hcd	20.021	1	44.4	1.1e-07	1	96558.8	HUMAN	DNA replication licensing factor MCM4
[7]	P33991	Gln->pyro-Glu	Q	733	-	59	54.3	8.96	5.6e-16	421.243	2	0.63	QLESLIR	Gln->pyro-Glu@1	MDA_143_FTMSms2hcd	41.29	1	23.6	1.6e-05	1	96558.8	HUMAN	DNA replication licensing factor MCM4
[7]	P33991	Met-loss+Acetyl	M	1	-	59	54.3	8.96	5.6e-16	466.227	2	-0.67	MSSPASTPSR	Met-loss+Acetyl@1	MDA_143_FTMSms2hcd	16.495	1	29.9	8e-06	1	96558.8	HUMAN	DNA replication licensing factor MCM4
[7]	P33991	Oxidation	M	194	-	59	54.3	8.96	5.6e-16	946.142	3	1.6	FIDPLAKEEENVGIDITEPLYMQR	Oxidation@22	MDA_143_FTMSms2hcd	45.44	1	57.8	2.8e-10	1	96558.8	HUMAN	DNA replication licensing factor MCM4
[7]	P33991	Oxidation	M	288	-	59	54.3	8.96	5.6e-16	1079.07	2	1.5	NLNPEDIDQLITISGMVIR	Oxidation@16	MDA_143_FTMSms2hcd	52.537	1	67.3	1.3e-15	1	96558.8	HUMAN	DNA replication licensing factor MCM4
[7]	P33991	Oxidation	M	361	-	59	54.3	8.96	5.6e-16	780.385	4	0.76	LQESPEDMPAGQTPHTVILFAHNDLVDK	Oxidation@8	MDA_143_FTMSms2hcd	37.428	1	71.2	5.7e-15	1	96558.8	HUMAN	DNA replication licensing factor MCM4
[7]	P33991	Oxidation	M	548	-	59	54.3	8.96	5.6e-16	650.335	2	0.78	GSSAVGLTAYVMK	Oxidation@12	MDA_143_FTMSms2hcd	31.459	1	46.6	9.8e-14	1	96558.8	HUMAN	DNA replication licensing factor MCM4
[7]	P33991	Oxidation	M	591	-	59	54.3	8.96	5.6e-16	914.979	2	1.6	SVLHEVMEQQTLSIAK	Oxidation@7	MDA_143_FTMSms2hcd	31.055	1	67.2	1.2e-13	1	96558.8	HUMAN	DNA replication licensing factor MCM4
[7]	P33991	Oxidation	M	684	-	59	54.3	8.96	5.6e-16	790.401	4	2.9	LAHHLVALYYQSEEQAEEELLDMAVLK	Oxidation@23	MDA_143_FTMSms2hcd	46.393	1	66.7	2.4e-15	1	96558.8	HUMAN	DNA replication licensing factor MCM4
[7]	P33991	Oxidation	M	699	-	59	54.3	8.96	5.6e-16	777.376	2	1.4	DYIAYAHSTIMPR	Oxidation@11	MDA_143_FTMSms2hcd	29.682	1	63	1.7e-13	1	96558.8	HUMAN	DNA replication licensing factor MCM4
[7]	P33991	Oxidation	M	717	-	59	54.3	8.96	5.6e-16	970.969	2	1.8	LSEEASQALIEAYVDMR	Oxidation@16	MDA_143_FTMSms2hcd	43.124	1	66	5.6e-16	1	96558.8	HUMAN	DNA replication licensing factor MCM4
[7]	P33991	Oxidation	M	726	-	59	54.3	8.96	5.6e-16	448.719	2	0.74	GMVSAYPR	Oxidation@2	MDA_143_FTMSms2hcd	18.604	1	31.9	9.3e-09	1	96558.8	HUMAN	DNA replication licensing factor MCM4
[7]	P33991	Oxidation	M	790	-	59	54.3	8.96	5.6e-16	919.982	2	1.9	TGIVDISILTTGMSATSR	Oxidation@13	MDA_143_FTMSms2hcd	42.789	1	61.4	5.2e-11	1	96558.8	HUMAN	DNA replication licensing factor MCM4
[7]	P33991	Oxidation	M	839	-	59	54.3	8.96	5.6e-16	513.732	2	0.24	DMFEEALR	Oxidation@2	MDA_143_FTMSms2hcd	27.769	2	29	3e-08	1	96558.8	HUMAN	DNA replication licensing factor MCM4
[7-1]	Q9NZQ3	Oxidation	M	79	-	10	14.5	8.29	9.7e-15	410.209	3	1	AIEAVHNTAMR	Oxidation@10	MDA_143_FTMSms2hcd	16.38	1	38.9	1.7e-09	1	78960.9	HUMAN	NCK-interacting protein with SH3 domain
[7-1]	Q9NZQ3	Oxidation	M	317	-	10	14.5	8.29	9.7e-15	624.338	2	1.5	TIGAELMELVR	Oxidation@7	MDA_143_FTMSms2hcd	41.413	1	36.4	1e-08	1	78960.9	HUMAN	NCK-interacting protein with SH3 domain
[7-1]	Q9NZQ3	Oxidation	M	450	-	10	14.5	8.29	9.7e-15	739.023	3	2.8	NEFESVLALVAYYQMEHR	Oxidation@15	MDA_143_FTMSms2hcd	53.22	1	49.6	9.7e-15	1	78960.9	HUMAN	NCK-interacting protein with SH3 domain
[8]	P33993	Gln->pyro-Glu	Q	287	-	57	62.9	9.25	1.6e-16	913.476	2	-0.2	QVVQGLLSETYLEAHR	Gln->pyro-Glu@1	MDA_143_FTMSms2hcd	45.784	1	64.2	8.1e-14	1	81308.7	HUMAN	DNA replication licensing factor MCM7
[8]	P33993	Gln->pyro-Glu	Q	326	-	57	62.9	9.25	1.6e-16	627.781	2	1.3	QIAEEDFYEK	Gln->pyro-Glu@1	MDA_143_FTMSms2hcd	34.507	1	35.3	4.6e-08	1	81308.7	HUMAN	DNA replication licensing factor MCM7
[8]	P33993	Gln->pyro-Glu	Q	546	-	57	62.9	9.25	1.6e-16	708.331	2	2.1	QPPSQFEPLDMK	Gln->pyro-Glu@1;Oxidation@11	MDA_143_FTMSms2hcd	35.227	1	36.4	1e-11	1	81308.7	HUMAN	DNA replication licensing factor MCM7
[8]	P33993	Gln->pyro-Glu	Q	570	-	57	62.9	9.25	1.6e-16	1142.04	2	1.5	QPMVPESLADYITAAYVEMR	Gln->pyro-Glu@1;Oxidation@19=92	MDA_143_FTMSms2hcd	57.703	1	17.1	3.8e-08	1	81308.7	HUMAN	DNA replication licensing factor MCM7
[8]	P33993	Met-loss+Acetyl	M	1	19	57	62.9	9.25	1.6e-16	546.801	2	0.52	MALKDYALEK	Met-loss+Acetyl@1=19	MDA_143_FTMSms2hcd	30.525	1	46.4	3.4e-05	1	81308.7	HUMAN	DNA replication licensing factor MCM7
[8]	P33993	Oxidation	M	108	15	57	62.9	9.25	1.6e-16	412.194	2	0.064	LMMEQR	Oxidation@2=15	MDA_143_FTMSms2hcd	16.811	1	21.8	1.1e-05	1	81308.7	HUMAN	DNA replication licensing factor MCM7
[8]	P33993	Oxidation	M	109	14	57	62.9	9.25	1.6e-16	412.193	2	-1.4	LMMEQR	Oxidation@3=14	MDA_143_FTMSms2hcd	14.735	1	22.4	0.0001	1	81308.7	HUMAN	DNA replication licensing factor MCM7
[8]	P33993	Oxidation	M	131	-	57	62.9	9.25	1.6e-16	725.344	2	0.99	SPQNQYPAELMR	Oxidation@11	MDA_143_FTMSms2hcd	25.075	1	52	3.5e-13	1	81308.7	HUMAN	DNA replication licensing factor MCM7
[8]	P33993	Oxidation	M	237	-	57	62.9	9.25	1.6e-16	861.917	2	2.5	MQEHSDQVPVGNIPR	Oxidation@1	MDA_143_FTMSms2hcd	25.524	1	60	3.8e-13	1	81308.7	HUMAN	DNA replication licensing factor MCM7
[8]	P33993	Oxidation	M	306	-	57	62.9	9.25	1.6e-16	877.88	2	1.2	MNKSEDDESGAGELTR	Oxidation@1	MDA_143_FTMSms2hcd	17.625	1	59.2	1.3e-12	1	81308.7	HUMAN	DNA replication licensing factor MCM7
[8]	P33993	Oxidation	M	462	-	57	62.9	9.25	1.6e-16	907.971	2	1.3	TAIHEVMEQQTISIAK	Oxidation@7	MDA_143_FTMSms2hcd	27.428	1	72.3	1.8e-14	1	81308.7	HUMAN	DNA replication licensing factor MCM7
[8]	P33993	Oxidation	M	556	-	57	62.9	9.25	1.6e-16	708.331	2	2.1	QPPSQFEPLDMK	Gln->pyro-Glu@1;Oxidation@11	MDA_143_FTMSms2hcd	35.227	1	36.4	1e-11	1	81308.7	HUMAN	DNA replication licensing factor MCM7
[8]	P33993	Oxidation	M	572	-	57	62.9	9.25	1.6e-16	858.415	3	1.8	EKQPMVPESLADYITAAYVEMR	Oxidation@5;Oxidation@21	MDA_143_FTMSms2hcd	46.019	1	61.2	6.5e-13	1	81308.7	HUMAN	DNA replication licensing factor MCM7
[8]	P33993	Oxidation	M	588	-	57	62.9	9.25	1.6e-16	858.415	3	1.8	EKQPMVPESLADYITAAYVEMR	Oxidation@5;Oxidation@21	MDA_143_FTMSms2hcd	46.019	1	61.2	6.5e-13	1	81308.7	HUMAN	DNA replication licensing factor MCM7
[8]	P33993	Oxidation	M	621	-	57	62.9	9.25	1.6e-16	881.439	2	1.6	MVDVVEKEDVNEAIR	Oxidation@1	MDA_143_FTMSms2hcd	27.269	1	50.8	4.3e-11	1	81308.7	HUMAN	DNA replication licensing factor MCM7
[9]	Q14697	Gln->pyro-Glu	Q	378	-	53	56.7	10.36	1.4e-18	1259.64	2	1.9	QYASLTGTQALPPLFSLGYHQSR	Gln->pyro-Glu@1	MDA_143_FTMSms2hcd	50.489	1	59.2	1.1e-11	1	106875	HUMAN	Neutral alpha-glucosidase AB
[9]	Q14697	Oxidation	M	142	-	53	56.7	10.36	1.4e-18	766.704	3	2.4	LSVSGRDENSVELTMAEGPYK	Oxidation@15	MDA_143_FTMSms2hcd	29.669	1	52	1.1e-11	1	106875	HUMAN	Neutral alpha-glucosidase AB
[9]	Q14697	Oxidation	M	242	-	53	56.7	10.36	1.4e-18	797.977	5	1.9	THSDSKPYGPMSVGLDFSLPGMEHVYGIPEHADNLR	Oxidation@11;Oxidation@22	MDA_143_FTMSms2hcd	38.91	1	72.4	2.6e-16	1	106875	HUMAN	Neutral alpha-glucosidase AB
[9]	Q14697	Oxidation	M	253	-	53	56.7	10.36	1.4e-18	797.977	5	1.9	THSDSKPYGPMSVGLDFSLPGMEHVYGIPEHADNLR	Oxidation@11;Oxidation@22	MDA_143_FTMSms2hcd	38.91	1	72.4	2.6e-16	1	106875	HUMAN	Neutral alpha-glucosidase AB
[9]	Q14697	Oxidation	M	293	-	53	56.7	10.36	1.4e-18	916.469	4	1.8	LYNLDVFQYELYNPMALYGSVPVLLAHNPHR	Oxidation@15	MDA_143_FTMSms2hcd	53.263	1	77.3	2.6e-16	1	106875	HUMAN	Neutral alpha-glucosidase AB
[9]	Q14697	Oxidation	M	338	-	53	56.7	10.36	1.4e-18	980.426	2	1.7	MMDYLQGSGETPQTDVR	Oxidation@1;Oxidation@2	MDA_143_FTMSms2hcd	26.787	1	64.6	1.4e-18	1	106875	HUMAN	Neutral alpha-glucosidase AB
[9]	Q14697	Oxidation	M	339	-	53	56.7	10.36	1.4e-18	980.426	2	1.7	MMDYLQGSGETPQTDVR	Oxidation@1;Oxidation@2	MDA_143_FTMSms2hcd	26.787	1	64.6	1.4e-18	1	106875	HUMAN	Neutral alpha-glucosidase AB
[9]	Q14697	Oxidation	M	581	-	53	56.7	10.36	1.4e-18	721.023	3	2.7	DVHNIYGLYVHMATADGLR	Oxidation@12	MDA_143_FTMSms2hcd	36.207	1	71.5	6.9e-16	1	106875	HUMAN	Neutral alpha-glucosidase AB
[9]	Q14697	Oxidation	M	594	-	53	56.7	10.36	1.4e-18	445.9	3	2.1	SGGMERPFVLAR	Oxidation@4	MDA_143_FTMSms2hcd	26.79	1	44.7	7e-12	1	106875	HUMAN	Neutral alpha-glucosidase AB
[9]	Q14697	Oxidation	M	666	-	53	56.7	10.36	1.4e-18	805.367	2	1.3	WYQMGAYQPFFR	Oxidation@4	MDA_143_FTMSms2hcd	39.342	1	41.4	2e-09	1	106875	HUMAN	Neutral alpha-glucosidase AB
[10]	P47897	Gln->pyro-Glu	Q	255	-	60	55.6	9.53	4.9e-17	610.823	2	1.1	QHLEITGGQVR	Gln->pyro-Glu@1	MDA_143_FTMSms2hcd	28.669	1	47.7	5.7e-10	1	87799.5	HUMAN	Glutamine--tRNA ligase
[10]	P47897	Oxidation	M	146	-	60	55.6	9.53	4.9e-17	524.244	3	1.6	YHFNMGLLMGEAR	Oxidation@5;Oxidation@9	MDA_143_FTMSms2hcd	30.455	1	45	3.9e-12	1	87799.5	HUMAN	Glutamine--tRNA ligase
[10]	P47897	Oxidation	M	150	-	60	55.6	9.53	4.9e-17	524.244	3	1.6	YHFNMGLLMGEAR	Oxidation@5;Oxidation@9	MDA_143_FTMSms2hcd	30.455	1	45	3.9e-12	1	87799.5	HUMAN	Glutamine--tRNA ligase
[10]	P47897	Oxidation	M	164	-	60	55.6	9.53	4.9e-17	666.357	3	0.91	MIKNEVDMQVLHLLGPK	Oxidation@1;Oxidation@8	MDA_143_FTMSms2hcd	36.971	1	61.4	4.9e-17	1	87799.5	HUMAN	Glutamine--tRNA ligase
[10]	P47897	Oxidation	M	171	-	60	55.6	9.53	4.9e-17	666.357	3	0.91	MIKNEVDMQVLHLLGPK	Oxidation@1;Oxidation@8	MDA_143_FTMSms2hcd	36.971	1	61.4	4.9e-17	1	87799.5	HUMAN	Glutamine--tRNA ligase
[10]	P47897	Oxidation	M	221	-	60	55.6	9.53	4.9e-17	755.363	3	1.6	DVVENGETADQTLSLMEQLR	Oxidation@16	MDA_143_FTMSms2hcd	36.059	1	48.1	8.5e-14	1	87799.5	HUMAN	Glutamine--tRNA ligase
[10]	P47897	Oxidation	M	250	-	60	55.6	9.53	4.9e-17	562.969	3	1.9	TPGYVVTPHTMNLLK	Oxidation@11	MDA_143_FTMSms2hcd	31.129	1	56.9	4.2e-13	1	87799.5	HUMAN	Glutamine--tRNA ligase
[10]	P47897	Oxidation	M	380	-	60	55.6	9.53	4.9e-17	934.95	2	2.8	DRPMEESLLLFEAMR	Oxidation@4;Oxidation@14	MDA_143_FTMSms2hcd	38.916	1	46	7.2e-11	1	87799.5	HUMAN	Glutamine--tRNA ligase
[10]	P47897	Oxidation	M	390	-	60	55.6	9.53	4.9e-17	934.95	2	2.8	DRPMEESLLLFEAMR	Oxidation@4;Oxidation@14	MDA_143_FTMSms2hcd	38.916	1	46	7.2e-11	1	87799.5	HUMAN	Glutamine--tRNA ligase
[10]	P47897	Oxidation	M	408	-	60	55.6	9.53	4.9e-17	404.199	2	-0.94	LVMEDGK	Oxidation@3	MDA_143_FTMSms2hcd	13.438	1	23.6	3.7e-08	1	87799.5	HUMAN	Glutamine--tRNA ligase
[10]	P47897	Oxidation	M	413	-	60	55.6	9.53	4.9e-17	828.394	2	2.3	LVMEDGKMDPVAYR	Oxidation@3;Oxidation@8	MDA_143_FTMSms2hcd	23.207	1	59.1	2.4e-12	1	87799.5	HUMAN	Glutamine--tRNA ligase
[10]	P47897	Oxidation	M	569	-	60	55.6	9.53	4.9e-17	503.274	2	1.4	AMAVLESLR	Oxidation@2	MDA_143_FTMSms2hcd	29.069	1	41.8	9.6e-08	1	87799.5	HUMAN	Glutamine--tRNA ligase
[10-1]	P07814	Acetyl	K	197	-	58	40.3	10.55	6.1e-19	564.303	3	6.8	FVELPGAEMGKVTVR	Oxidation@9;Acetyl@11	MDA_143_FTMSms2hcd	48.65	1	15.4	0.028	1	170592	HUMAN	Bifunctional glutamate/proline--tRNA ligase
[10-1]	P07814	Oxidation	M	195	-	58	40.3	10.55	6.1e-19	564.303	3	6.8	FVELPGAEMGKVTVR	Oxidation@9;Acetyl@11	MDA_143_FTMSms2hcd	48.65	1	15.4	0.028	1	170592	HUMAN	Bifunctional glutamate/proline--tRNA ligase
[10-1]	P07814	Oxidation	M	258	-	58	40.3	10.55	6.1e-19	839.168	4	1.8	VILEDVAMLHIKPDQFTYTSDHFETIMK	Oxidation@8;Oxidation@27	MDA_143_FTMSms2hcd	41.693	1	71.4	6.1e-19	1	170592	HUMAN	Bifunctional glutamate/proline--tRNA ligase
[10-1]	P07814	Oxidation	M	277	-	58	40.3	10.55	6.1e-19	839.168	4	1.8	VILEDVAMLHIKPDQFTYTSDHFETIMK	Oxidation@8;Oxidation@27	MDA_143_FTMSms2hcd	41.693	1	71.4	6.1e-19	1	170592	HUMAN	Bifunctional glutamate/proline--tRNA ligase
[10-1]	P07814	Oxidation	M	299	-	58	40.3	10.55	6.1e-19	692.309	2	1.5	AYVDDTPAEQMK	Oxidation@11	MDA_143_FTMSms2hcd	20.415	1	50.6	1.3e-14	1	170592	HUMAN	Bifunctional glutamate/proline--tRNA ligase
[10-1]	P07814	Oxidation	M	322	-	58	40.3	10.55	6.1e-19	456.881	3	0.52	NLQMWEEMKK	Oxidation@4;Oxidation@8	MDA_143_FTMSms2hcd	22.901	1	22.2	1.8e-06	1	170592	HUMAN	Bifunctional glutamate/proline--tRNA ligase
[10-1]	P07814	Oxidation	M	326	-	58	40.3	10.55	6.1e-19	456.881	3	0.52	NLQMWEEMKK	Oxidation@4;Oxidation@8	MDA_143_FTMSms2hcd	22.901	1	22.2	1.8e-06	1	170592	HUMAN	Bifunctional glutamate/proline--tRNA ligase
[10-1]	P07814	Oxidation	M	466	-	58	40.3	10.55	6.1e-19	425.721	2	0.29	GMTVEGLK	Oxidation@2	MDA_143_FTMSms2hcd	19.559	1	21.9	1.7e-05	1	170592	HUMAN	Bifunctional glutamate/proline--tRNA ligase
[10-1]	P07814	Oxidation	M	527	-	58	40.3	10.55	6.1e-19	864.432	2	3.2	EVIPVNVPEAQEEMK	Oxidation@14	MDA_143_FTMSms2hcd	32.727	1	33.9	1.7e-09	1	170592	HUMAN	Bifunctional glutamate/proline--tRNA ligase
[10-1]	P07814	Oxidation	M	1126	-	58	40.3	10.55	6.1e-19	856.441	3	1.4	TELAEPIAIRPTSETVMYPAYAK	Oxidation@17	MDA_143_FTMSms2hcd	37.351	1	61.9	7.5e-13	1	170592	HUMAN	Bifunctional glutamate/proline--tRNA ligase
[10-1]	P07814	Oxidation	M	1251	-	58	40.3	10.55	6.1e-19	635.805	2	0.57	MFEIVFEDPK	Oxidation@1	MDA_143_FTMSms2hcd	39.102	1	25.9	1.3e-07	1	170592	HUMAN	Bifunctional glutamate/proline--tRNA ligase
[10-1]	P07814	Oxidation	M	1474	-	58	40.3	10.55	6.1e-19	716.326	2	2.3	DQDLEPGAPSMGAK	Oxidation@11	MDA_143_FTMSms2hcd	21.493	1	46.8	1.4e-09	1	170592	HUMAN	Bifunctional glutamate/proline--tRNA ligase
[11]	P31948	Oxidation	M	115	-	61	60.8	9.19	2.1e-16	532.246	2	0.98	EGLQNMEAR	Oxidation@6	MDA_143_FTMSms2hcd	15.68	1	36.9	2.2e-08	1	62639.8	HUMAN	Stress-induced-phosphoprotein 1
[11]	P31948	Oxidation	M	125	-	61	60.8	9.19	2.1e-16	902.434	2	2.6	KFMNPFNMPNLYQK	Oxidation@3;Oxidation@8	MDA_143_FTMSms2hcd	32.871	1	45.7	2e-11	1	62639.8	HUMAN	Stress-induced-phosphoprotein 1
[11]	P31948	Oxidation	M	130	-	61	60.8	9.19	2.1e-16	902.434	2	2.6	KFMNPFNMPNLYQK	Oxidation@3;Oxidation@8	MDA_143_FTMSms2hcd	32.871	1	45.7	2e-11	1	62639.8	HUMAN	Stress-induced-phosphoprotein 1
[11]	P31948	Oxidation	M	214	-	61	60.8	9.19	2.1e-16	643.976	3	1.3	KETKPEPMEEDLPENK	Oxidation@8	MDA_143_FTMSms2hcd	19.086	1	45.6	5.2e-09	1	62639.8	HUMAN	Stress-induced-phosphoprotein 1
[11]	P31948	Oxidation	M	259	-	61	60.8	9.19	2.1e-16	855.086	3	2.2	AKELDPTNMTYITNQAAVYFEK	Oxidation@9	MDA_143_FTMSms2hcd	38.081	1	54.9	1.9e-11	1	62639.8	HUMAN	Stress-induced-phosphoprotein 1
[11]	P31948	Oxidation	M	380	-	61	60.8	9.19	2.1e-16	463.208	2	0.57	GDYPQAMK	Oxidation@7	MDA_143_FTMSms2hcd	15.254	1	30.3	1.9e-08	1	62639.8	HUMAN	Stress-induced-phosphoprotein 1
[11]	P31948	Oxidation	M	441	-	61	60.8	9.19	2.1e-16	485.922	3	0.59	KAAALEAMKDYTK	Oxidation@8	MDA_143_FTMSms2hcd	17.331	1	53.9	5.5e-13	1	62639.8	HUMAN	Stress-induced-phosphoprotein 1
[11]	P31948	Oxidation	M	448	-	61	60.8	9.19	2.1e-16	435.704	2	-1.4	AMDVYQK	Oxidation@2	MDA_143_FTMSms2hcd	14.314	1	28.4	4.5e-10	1	62639.8	HUMAN	Stress-induced-phosphoprotein 1
[11]	P31948	Oxidation	M	511	-	61	60.8	9.19	2.1e-16	509.784	2	0.37	LILEQMQK	Oxidation@6	MDA_143_FTMSms2hcd	23.567	1	35.4	6.6e-07	1	62639.8	HUMAN	Stress-induced-phosphoprotein 1
[11]	P31948	Oxidation	M	535	-	61	60.8	9.19	2.1e-16	558.826	2	0.16	LMDVGLIAIR	Oxidation@2	MDA_143_FTMSms2hcd	38.03	1	40.9	3.9e-08	1	62639.8	HUMAN	Stress-induced-phosphoprotein 1
[11]	P31948	Phospho	S	481	-	61	60.8	9.19	2.1e-16	388.168	3	-0.51	HDSPEDVKR	Phospho@3	MDA_143_FTMSms2hcd	12.672	1	18.8	1.8e-07	1	62639.8	HUMAN	Stress-induced-phosphoprotein 1
[12]	P33992	Acetyl	K	569	-	58	66.2	12.2	5.5e-22	519.943	3	5.3	VKCGPRLSAEAAEK	Acetyl@2	MDA_143_FTMSms2hcd	28.38	2	29.2	0.00011	1	82286.3	HUMAN	DNA replication licensing factor MCM5
[12]	P33992	Gln->pyro-Glu	Q	91	-	58	66.2	12.2	5.5e-22	780.408	2	0.85	QPAEHLQLLEEAAK	Gln->pyro-Glu@1	MDA_143_FTMSms2hcd	38.52	1	48.3	9.3e-08	1	82286.3	HUMAN	DNA replication licensing factor MCM5
[12]	P33992	Gln->pyro-Glu	Q	701	-	58	66.2	12.2	5.5e-22	411.884	3	-0.27	QKYPEHAIHK	Gln->pyro-Glu@1	MDA_143_FTMSms2hcd	16.903	1	36.6	4.5e-08	1	82286.3	HUMAN	DNA replication licensing factor MCM5
[12]	P33992	Met-loss+Acetyl	M	1	-	58	66.2	12.2	5.5e-22	1376.08	2	2.8	MSGFDDPGIFYSDSFGGDAQADEGQAR	Met-loss+Acetyl@1	MDA_143_FTMSms2hcd	45.191	1	72.7	5.5e-22	1	82286.3	HUMAN	DNA replication licensing factor MCM5
[12]	P33992	Oxidation	M	127	-	58	66.2	12.2	5.5e-22	714.373	4	3.3	EVADEVTRPRPSGEEVLQDIQVMLK	Oxidation@23	MDA_143_FTMSms2hcd	39.348	1	49	1.1e-10	1	82286.3	HUMAN	DNA replication licensing factor MCM5
[12]	P33992	Oxidation	M	144	-	58	66.2	12.2	5.5e-22	540.246	2	-0.62	SDMMSHLVK	Oxidation@3;Oxidation@4	MDA_143_FTMSms2hcd	14.717	1	29.1	8.7e-10	1	82286.3	HUMAN	DNA replication licensing factor MCM5
[12]	P33992	Oxidation	M	145	-	58	66.2	12.2	5.5e-22	540.246	2	-0.62	SDMMSHLVK	Oxidation@3;Oxidation@4	MDA_143_FTMSms2hcd	14.717	1	29.1	8.7e-10	1	82286.3	HUMAN	DNA replication licensing factor MCM5
[12]	P33992	Oxidation	M	184	-	58	66.2	12.2	5.5e-22	701.707	3	2.1	NTLTNIAMRPGLEGYALPR	Oxidation@8	MDA_143_FTMSms2hcd	37.608	1	58.8	2.6e-11	1	82286.3	HUMAN	DNA replication licensing factor MCM5
[12]	P33992	Oxidation	M	241	-	58	66.2	12.2	5.5e-22	568.952	3	1.5	LQELPDAVPHGEMPR	Oxidation@13	MDA_143_FTMSms2hcd	28.38	1	60.4	1.3e-10	1	82286.3	HUMAN	DNA replication licensing factor MCM5
[12]	P33992	Oxidation	M	266	-	58	66.2	12.2	5.5e-22	570.821	2	1.9	VTIMGIYSIK	Oxidation@4	MDA_143_FTMSms2hcd	35.491	1	30.9	9.6e-06	1	82286.3	HUMAN	DNA replication licensing factor MCM5
[12]	P33992	Oxidation	M	349	-	58	66.2	12.2	5.5e-22	670.332	2	1.1	SIAPSIFGGTDMK	Oxidation@12	MDA_143_FTMSms2hcd	34.123	1	51.4	2.4e-11	1	82286.3	HUMAN	DNA replication licensing factor MCM5
[12]	P33992	Oxidation	M	379	-	58	66.2	12.2	5.5e-22	562.967	3	1.6	RGDINLLMLGDPGTAK	Oxidation@8	MDA_143_FTMSms2hcd	36.142	1	48.6	5.8e-11	1	82286.3	HUMAN	DNA replication licensing factor MCM5
[12]	P33992	Oxidation	M	419	-	58	66.2	12.2	5.5e-22	589.289	3	0.86	GSSAAGLTASVMRDPSSR	Oxidation@12	MDA_143_FTMSms2hcd	23.268	1	43.7	8.7e-11	1	82286.3	HUMAN	DNA replication licensing factor MCM5
[12]	P33992	Oxidation	M	462	-	58	66.2	12.2	5.5e-22	767.379	3	2.2	EDDRVAIHEAMEQQTISIAK	Oxidation@11	MDA_143_FTMSms2hcd	28.092	1	40.6	1.4e-09	1	82286.3	HUMAN	DNA replication licensing factor MCM5
[12]	P33992	Oxidation	M	507	-	58	66.2	12.2	5.5e-22	761.693	3	2.7	WDETKGEDNIDFMPTILSR	Oxidation@13	MDA_143_FTMSms2hcd	38.455	1	54.2	3e-11	1	82286.3	HUMAN	DNA replication licensing factor MCM5
[12]	P33992	Oxidation	M	516	-	58	66.2	12.2	5.5e-22	514.779	2	1.8	FDMIFIVK	Oxidation@3	MDA_143_FTMSms2hcd	38.375	1	35	4e-09	1	82286.3	HUMAN	DNA replication licensing factor MCM5
[12]	P33992	Oxidation	M	531	-	58	66.2	12.2	5.5e-22	653.57	4	2.1	FDMIFIVKDEHNEERDVMLAK	Oxidation@3;Oxidation@18	MDA_143_FTMSms2hcd	32.648	1	38.5	2.8e-09	1	82286.3	HUMAN	DNA replication licensing factor MCM5
[12]	P33992	Oxidation	M	589	-	58	66.2	12.2	5.5e-22	356.197	2	0.72	YIIMR	Oxidation@4	MDA_143_FTMSms2hcd	21.385	1	21.6	0.0003	1	82286.3	HUMAN	DNA replication licensing factor MCM5
[12]	P33992	Oxidation	M	626	-	58	66.2	12.2	5.5e-22	655.333	3	2.1	MKLQPFATEADVEEALR	Oxidation@1	MDA_143_FTMSms2hcd	38.304	1	44.1	1.1e-09	1	82286.3	HUMAN	DNA replication licensing factor MCM5
[12]	P33992	Oxidation	M	671	-	58	66.2	12.2	5.5e-22	1144.89	3	2.3	LFQVSTLDAALSGTLSGVEGFTSQEDQEMLSR	Oxidation@29	MDA_143_FTMSms2hcd	54.13	1	67.4	1.8e-18	1	82286.3	HUMAN	DNA replication licensing factor MCM5
[12]	P33992	Oxidation	M	715	-	58	66.2	12.2	5.5e-22	444.771	2	0.66	VLQLMLR	Oxidation@5	MDA_143_FTMSms2hcd	32.825	1	29	3.7e-05	1	82286.3	HUMAN	DNA replication licensing factor MCM5
[13]	P45974	Gln->pyro-Glu	Q	433	-	47	53.8	9.38	9.2e-17	1059.01	2	2.7	QQDAQEFFLHLINMVER	Gln->pyro-Glu@1;Oxidation@14	MDA_143_FTMSms2hcd	57.745	1	67.3	9.2e-17	1	95787.1	HUMAN	Ubiquitin carboxyl-terminal hydrolase 5
[13]	P45974	Oxidation	M	266	-	47	53.8	9.38	9.2e-17	1053.74	4	2.1	LGTITPDGADVYSYDEDDMVLDPSLAEHLSHFGIDMLK	Oxidation@19;Oxidation@36	MDA_143_FTMSms2hcd	47.792	1	60	1.9e-13	1	95787.1	HUMAN	Ubiquitin carboxyl-terminal hydrolase 5
[13]	P45974	Oxidation	M	283	-	47	53.8	9.38	9.2e-17	1053.74	4	2.1	LGTITPDGADVYSYDEDDMVLDPSLAEHLSHFGIDMLK	Oxidation@19;Oxidation@36	MDA_143_FTMSms2hcd	47.792	1	60	1.9e-13	1	95787.1	HUMAN	Ubiquitin carboxyl-terminal hydrolase 5
[13]	P45974	Oxidation	M	293	-	47	53.8	9.38	9.2e-17	619.617	3	-0.0038	TDKTMTELEIDMNQR	Oxidation@5;Oxidation@12	MDA_143_FTMSms2hcd	23.607	1	41.5	1.5e-12	1	95787.1	HUMAN	Ubiquitin carboxyl-terminal hydrolase 5
[13]	P45974	Oxidation	M	300	-	47	53.8	9.38	9.2e-17	619.617	3	-0.0038	TDKTMTELEIDMNQR	Oxidation@5;Oxidation@12	MDA_143_FTMSms2hcd	23.607	1	41.5	1.5e-12	1	95787.1	HUMAN	Ubiquitin carboxyl-terminal hydrolase 5
[13]	P45974	Oxidation	M	446	-	47	53.8	9.38	9.2e-17	1059.01	2	2.7	QQDAQEFFLHLINMVER	Gln->pyro-Glu@1;Oxidation@14	MDA_143_FTMSms2hcd	57.745	1	67.3	9.2e-17	1	95787.1	HUMAN	Ubiquitin carboxyl-terminal hydrolase 5
[13]	P45974	Oxidation	M	487	-	47	53.8	9.38	9.2e-17	1038.18	3	2.2	VDYIMQLPVPMDAALNKEELLEYEEK	Oxidation@5;Oxidation@11	MDA_143_FTMSms2hcd	43.2	1	71.8	1e-16	1	95787.1	HUMAN	Ubiquitin carboxyl-terminal hydrolase 5
[13]	P45974	Oxidation	M	493	-	47	53.8	9.38	9.2e-17	1038.18	3	2.2	VDYIMQLPVPMDAALNKEELLEYEEK	Oxidation@5;Oxidation@11	MDA_143_FTMSms2hcd	43.2	1	71.8	1e-16	1	95787.1	HUMAN	Ubiquitin carboxyl-terminal hydrolase 5
[13]	P45974	Oxidation	M	517	-	47	53.8	9.38	9.2e-17	553.62	3	1.7	QAEEEKMALPELVR	Oxidation@7	MDA_143_FTMSms2hcd	29.614	1	32.5	7.9e-09	1	95787.1	HUMAN	Ubiquitin carboxyl-terminal hydrolase 5
[13]	P45974	Oxidation	M	593	-	47	53.8	9.38	9.2e-17	1066.05	2	2.7	KLDVSIEMPEELDISQLR	Oxidation@8	MDA_143_FTMSms2hcd	40.143	1	63.1	2.2e-13	1	95787.1	HUMAN	Ubiquitin carboxyl-terminal hydrolase 5
[13]	P45974	Oxidation	M	772	-	47	53.8	9.38	9.2e-17	898.08	3	2.4	AVDWIFSHIDDLDAEAAMDISEGR	Oxidation@18	MDA_143_FTMSms2hcd	49.394	1	61.5	5e-16	1	95787.1	HUMAN	Ubiquitin carboxyl-terminal hydrolase 5
[13-1]	Q92995	Oxidation	M	252	-	10	12.9	10.12	4e-18	505.255	2	0.62	DMGYPLAVK	Oxidation@2	MDA_143_FTMSms2hcd	28.022	1	23.8	6e-07	1	97328	HUMAN	Ubiquitin carboxyl-terminal hydrolase 13
[13-1]	Q92995	Oxidation	M	499	-	10	12.9	10.12	4e-18	1043.86	3	3.4	VDYLMQLPVAMEAATNKDELIAYELTR	Oxidation@5;Oxidation@11	MDA_143_FTMSms2hcd	46.641	1	69.3	4e-18	1	97328	HUMAN	Ubiquitin carboxyl-terminal hydrolase 13
[13-1]	Q92995	Oxidation	M	505	-	10	12.9	10.12	4e-18	1043.86	3	3.4	VDYLMQLPVAMEAATNKDELIAYELTR	Oxidation@5;Oxidation@11	MDA_143_FTMSms2hcd	46.641	1	69.3	4e-18	1	97328	HUMAN	Ubiquitin carboxyl-terminal hydrolase 13
[13-2]	Q8IWA5	Met-loss	M	1	-	8	8.9	5.44	1.8e-09	407.86	3	-0.38	MGDERPHYYGK	Met-loss@1	MDA_143_FTMSms2hcd	14.889	1	26.1	2.7e-06	1	80124.4	HUMAN	Choline transporter-like protein 2
[13-2]	Q8IWA5	Met-loss+Acetyl	M	1	-	8	8.9	5.44	1.8e-09	421.863	3	0.056	MGDERPHYYGK	Met-loss+Acetyl@1	MDA_143_FTMSms2hcd	18.088	1	35.2	2.6e-07	1	80124.4	HUMAN	Choline transporter-like protein 2
[13-2]	Q8IWA5	Oxidation	M	585	-	8	8.9	5.44	1.8e-09	514.274	2	1.5	NAFFLLMR	Oxidation@7	MDA_143_FTMSms2hcd	40.916	1	30.2	2.3e-07	1	80124.4	HUMAN	Choline transporter-like protein 2
[13-2]	Q8IWA5	Oxidation	M	688	-	8	8.9	5.44	1.8e-09	606.95	3	1	NDGSAERPYFMSSTLK	Oxidation@11	MDA_143_FTMSms2hcd	26.048	1	43.9	1.8e-09	1	80124.4	HUMAN	Choline transporter-like protein 2
[14]	P13639	Gln->pyro-Glu	Q	145	-	57	48.3	9.59	3.8e-17	335.68	2	0.68	QAIAER	Gln->pyro-Glu@1	MDA_143_FTMSms2hcd	19.564	1	17.6	0.00013	1	95339	HUMAN	Elongation factor 2
[14]	P13639	Gln->pyro-Glu	Q	227	-	57	48.3	9.59	3.8e-17	543.253	2	1.4	QFAEMYVAK	Gln->pyro-Glu@1;Oxidation@5	MDA_143_FTMSms2hcd	32.395	1	35.4	3.4e-10	1	95339	HUMAN	Elongation factor 2
[14]	P13639	Met-loss	M	1	-	57	48.3	9.59	3.8e-17	546.297	2	1.4	MVNFTVDQIR	Met-loss@1	MDA_143_FTMSms2hcd	31.848	1	41.6	6.1e-08	1	95339	HUMAN	Elongation factor 2
[14]	P13639	Oxidation	M	22	-	57	48.3	9.59	3.8e-17	662.328	2	1.8	NMSVIAHVDHGK	Oxidation@2	MDA_143_FTMSms2hcd	17.548	1	47.2	3.9e-12	1	95339	HUMAN	Elongation factor 2
[14]	P13639	Oxidation	M	156	-	57	48.3	9.59	3.8e-17	369.209	3	0.68	IKPVLMMNK	Oxidation@6;Oxidation@7	MDA_143_FTMSms2hcd	19.732	1	36.1	1.5e-09	1	95339	HUMAN	Elongation factor 2
[14]	P13639	Oxidation	M	157	-	57	48.3	9.59	3.8e-17	369.209	3	0.68	IKPVLMMNK	Oxidation@6;Oxidation@7	MDA_143_FTMSms2hcd	19.732	1	36.1	1.5e-09	1	95339	HUMAN	Elongation factor 2
[14]	P13639	Oxidation	M	231	-	57	48.3	9.59	3.8e-17	543.253	2	1.4	QFAEMYVAK	Gln->pyro-Glu@1;Oxidation@5	MDA_143_FTMSms2hcd	32.395	1	35.4	3.4e-10	1	95339	HUMAN	Elongation factor 2
[14]	P13639	Oxidation	M	305	-	57	48.3	9.59	3.8e-17	550.777	2	1.5	VFDAIMNFK	Oxidation@6	MDA_143_FTMSms2hcd	33.998	1	42.8	6.7e-11	1	95339	HUMAN	Elongation factor 2
[14]	P13639	Oxidation	M	353	-	57	48.3	9.59	3.8e-17	693.887	4	1	RWLPAGDALLQMITIHLPSPVTAQK	Oxidation@12	MDA_143_FTMSms2hcd	49.849	1	39.9	1.1e-09	1	95339	HUMAN	Elongation factor 2
[14]	P13639	Oxidation	M	395	-	57	48.3	9.59	3.8e-17	536.265	2	0.94	GPLMMYISK	Oxidation@4;Oxidation@5	MDA_143_FTMSms2hcd	27.587	1	37.8	1.1e-10	1	95339	HUMAN	Elongation factor 2
[14]	P13639	Oxidation	M	396	-	57	48.3	9.59	3.8e-17	536.265	2	0.94	GPLMMYISK	Oxidation@4;Oxidation@5	MDA_143_FTMSms2hcd	27.587	1	37.8	1.1e-10	1	95339	HUMAN	Elongation factor 2
[14]	P13639	Oxidation	M	430	-	57	48.3	9.59	3.8e-17	611.319	2	1.2	IMGPNYTPGKK	Oxidation@2	MDA_143_FTMSms2hcd	19.28	1	51.3	1.2e-09	1	95339	HUMAN	Elongation factor 2
[14]	P13639	Oxidation	M	453	-	57	48.3	9.59	3.8e-17	427.218	2	1.1	TILMMGR	Oxidation@4;Oxidation@5	MDA_143_FTMSms2hcd	20.597	1	34.4	1e-06	1	95339	HUMAN	Elongation factor 2
[14]	P13639	Oxidation	M	454	-	57	48.3	9.59	3.8e-17	427.218	2	1.1	TILMMGR	Oxidation@4;Oxidation@5	MDA_143_FTMSms2hcd	20.597	1	34.4	1e-06	1	95339	HUMAN	Elongation factor 2
[14]	P13639	Oxidation	M	494	-	57	48.3	9.59	3.8e-17	544.592	3	0.48	TGTITTFEHAHNMR	Oxidation@13	MDA_143_FTMSms2hcd	21.16	2	61.9	4.1e-14	1	95339	HUMAN	Elongation factor 2
[14]	P13639	Oxidation	M	781	-	57	48.3	9.59	3.8e-17	712.031	3	2	RGHVFEESQVAGTPMFVVK	Oxidation@15	MDA_143_FTMSms2hcd	31.521	1	49.4	1.1e-09	1	95339	HUMAN	Elongation factor 2
[14]	P13639	Phospho	T	57	-	57	48.3	9.59	3.8e-17	528.874	3	-0.48	FTDTRKDEQER	Phospho@2;Phospho@4	MDA_143_FTMSms2hcd	14.285	1	16.8	0.00051	1	95339	HUMAN	Elongation factor 2
[14]	P13639	Phospho	T	59	-	57	48.3	9.59	3.8e-17	528.874	3	-0.48	FTDTRKDEQER	Phospho@2;Phospho@4	MDA_143_FTMSms2hcd	14.285	1	16.8	0.00051	1	95339	HUMAN	Elongation factor 2
[14-1]	Q15029	Oxidation	M	203	-	5	9.9	6.9	3.7e-12	900.432	3	1.3	SYLFNIMDTPGHVNFSDEVTAGLR	Oxidation@7	MDA_143_FTMSms2hcd	44.473	1	41.1	3.6e-11	1	109437	HUMAN	116 kDa U5 small nuclear ribonucleoprotein component
[15]	P49327	Oxidation	M	453	-	45	27.4	8.09	2.2e-14	916.789	3	1.7	HSQDLAFLSMLNDIAAVPATAMPFR	Oxidation@10;Oxidation@22	MDA_143_FTMSms2hcd	49.452	1	53.7	3e-12	1	273429	HUMAN	Fatty acid synthase
[15]	P49327	Oxidation	M	465	-	45	27.4	8.09	2.2e-14	916.789	3	1.7	HSQDLAFLSMLNDIAAVPATAMPFR	Oxidation@10;Oxidation@22	MDA_143_FTMSms2hcd	49.452	1	53.7	3e-12	1	273429	HUMAN	Fatty acid synthase
[15]	P49327	Oxidation	M	680	-	45	27.4	8.09	2.2e-14	861.761	3	2	TGGMAFHSYFMEAIAPPLLQELK	Oxidation@4;Oxidation@11	MDA_143_FTMSms2hcd	48.029	1	54.5	1.3e-12	1	273429	HUMAN	Fatty acid synthase
[15]	P49327	Oxidation	M	687	-	45	27.4	8.09	2.2e-14	861.761	3	2	TGGMAFHSYFMEAIAPPLLQELK	Oxidation@4;Oxidation@11	MDA_143_FTMSms2hcd	48.029	1	54.5	1.3e-12	1	273429	HUMAN	Fatty acid synthase
[15]	P49327	Oxidation	M	1503	-	45	27.4	8.09	2.2e-14	711.875	2	0.68	VLQGDLVMNVYR	Oxidation@8	MDA_143_FTMSms2hcd	32.988	1	44.8	3.9e-11	1	273429	HUMAN	Fatty acid synthase
[15]	P49327	Oxidation	M	1601	-	45	27.4	8.09	2.2e-14	865.398	2	2	WTSQDSLLGMEFSGR	Oxidation@10	MDA_143_FTMSms2hcd	37.569	1	60.6	3.9e-14	1	273429	HUMAN	Fatty acid synthase
[15]	P49327	Oxidation	M	1782	-	45	27.4	8.09	2.2e-14	634.344	4	2.8	FLEIGKFDLSQNHPLGMAIFLK	Oxidation@17	MDA_143_FTMSms2hcd	45.655	1	54.1	8.6e-12	1	273429	HUMAN	Fatty acid synthase
[15]	P49327	Oxidation	M	2232	-	45	27.4	8.09	2.2e-14	721.888	2	1.1	SLLVNPEGPTLMR	Oxidation@12	MDA_143_FTMSms2hcd	34.628	1	35.8	4e-09	1	273429	HUMAN	Fatty acid synthase
[16]	O14980	Gln->pyro-Glu	Q	15	-	55	41.8	9.25	1.6e-16	481.254	2	1.2	QLLDFSQK	Gln->pyro-Glu@1	MDA_143_FTMSms2hcd	40.251	1	33.7	3.4e-06	1	123387	HUMAN	Exportin-1
[16]	O14980	Gln->pyro-Glu	Q	407	-	55	41.8	9.25	1.6e-16	576.313	2	1.2	QLYLPMLFK	Gln->pyro-Glu@1;Oxidation@6	MDA_143_FTMSms2hcd	53.346	1	34.7	3.8e-07	1	123387	HUMAN	Exportin-1
[16]	O14980	Oxidation	M	45	-	55	41.8	9.25	1.6e-16	593.319	2	0.76	MAQEVLTHLK	Oxidation@1	MDA_143_FTMSms2hcd	24.533	1	38.3	9.8e-11	1	123387	HUMAN	Exportin-1
[16]	O14980	Oxidation	M	73	-	55	41.8	9.25	1.6e-16	828.402	2	1.8	VDTILEFSQNMNTK	Oxidation@11	MDA_143_FTMSms2hcd	34.195	1	50.2	6.2e-13	1	123387	HUMAN	Exportin-1
[16]	O14980	Oxidation	M	132	-	55	41.8	9.25	1.6e-16	587.696	3	2.3	VYIGKLNMILVQILK	Oxidation@8	MDA_143_FTMSms2hcd	51.926	1	49.9	9.9e-11	1	123387	HUMAN	Exportin-1
[16]	O14980	Oxidation	M	259	-	55	41.8	9.25	1.6e-16	520.274	2	1.7	FLNVPMFR	Oxidation@6	MDA_143_FTMSms2hcd	37.713	1	42.5	1.5e-08	1	123387	HUMAN	Exportin-1
[16]	O14980	Oxidation	M	297	-	55	41.8	9.25	1.6e-16	608.33	2	0.91	QMLPLNTNIR	Oxidation@2	MDA_143_FTMSms2hcd	30.505	1	31.6	2.8e-06	1	123387	HUMAN	Exportin-1
[16]	O14980	Oxidation	M	412	-	55	41.8	9.25	1.6e-16	662.877	2	1.8	RQLYLPMLFK	Oxidation@7	MDA_143_FTMSms2hcd	39.77	1	20.6	0.00024	1	123387	HUMAN	Exportin-1
[16]	O14980	Oxidation	M	420	-	55	41.8	9.25	1.6e-16	367.715	2	0.82	LLMVSR	Oxidation@3	MDA_143_FTMSms2hcd	22.372	2	28.2	0.00023	1	123387	HUMAN	Exportin-1
[16]	O14980	Oxidation	M	424	-	55	41.8	9.25	1.6e-16	1079.05	2	1.6	MAKPEEVLVVENDQGEVVR	Oxidation@1	MDA_143_FTMSms2hcd	31.318	1	61.8	5.6e-14	1	123387	HUMAN	Exportin-1
[16]	O14980	Oxidation	M	445	-	55	41.8	9.25	1.6e-16	810.385	2	0.6	EFMKDTDSINLYK	Oxidation@3	MDA_143_FTMSms2hcd	27.659	1	42.5	4.4e-10	1	123387	HUMAN	Exportin-1
[16]	O14980	Oxidation	M	545	-	55	41.8	9.25	1.6e-16	912.99	2	3.2	AIIASNIMYIVGQYPR	Oxidation@8	MDA_143_FTMSms2hcd	43.441	1	63.8	1.1e-13	1	123387	HUMAN	Exportin-1
[16]	O14980	Oxidation	M	658	-	55	41.8	9.25	1.6e-16	1082.56	2	2	YMLLPNQVWDSIIQQATK	Oxidation@2	MDA_143_FTMSms2hcd	54.206	1	54.4	3.1e-12	1	123387	HUMAN	Exportin-1
[16]	O14980	Oxidation	M	717	-	55	41.8	9.25	1.6e-16	644.337	2	0.61	IYLDMLNVYK	Oxidation@5	MDA_143_FTMSms2hcd	37.079	1	43.6	1.5e-08	1	123387	HUMAN	Exportin-1
[16]	O14980	Oxidation	M	804	-	55	41.8	9.25	1.6e-16	780.423	2	1.8	EPEVLSTMAIIVNK	Oxidation@8	MDA_143_FTMSms2hcd	35.916	1	48	1.3e-11	1	123387	HUMAN	Exportin-1
[17]	Q9UIA9	Gln->pyro-Glu	Q	17	-	52	44.8	9.51	5.3e-17	656.308	2	1.4	QLYETTDTTTR	Gln->pyro-Glu@1	MDA_143_FTMSms2hcd	27.865	1	28.6	1.2e-06	1	123908	HUMAN	Exportin-7
[17]	Q9UIA9	Oxidation	M	217	-	52	44.8	9.51	5.3e-17	699.367	3	2.3	NLNLNDESQHGLLMQLLK	Oxidation@14	MDA_143_FTMSms2hcd	42.806	1	69.1	4.2e-15	1	123908	HUMAN	Exportin-7
[17]	Q9UIA9	Oxidation	M	401	-	52	44.8	9.51	5.3e-17	621.634	3	2	ATEPHMLETYTPEVTK	Oxidation@6	MDA_143_FTMSms2hcd	26.995	1	57.4	3.1e-13	1	123908	HUMAN	Exportin-7
[17]	Q9UIA9	Oxidation	M	531	-	52	44.8	9.51	5.3e-17	653.346	2	0.77	VLQLMNLTDSR	Oxidation@5	MDA_143_FTMSms2hcd	33.126	1	39.4	4.9e-07	1	123908	HUMAN	Exportin-7
[17]	Q9UIA9	Oxidation	M	550	-	52	44.8	9.51	5.3e-17	820.09	3	4.5	LAQAGNEKLELAMLSFFEQFR	Oxidation@13	MDA_143_FTMSms2hcd	48.46	1	51.4	1.4e-13	1	123908	HUMAN	Exportin-7
[17]	Q9UIA9	Oxidation	M	587	-	52	44.8	9.51	5.3e-17	1090.58	2	0.75	LSEVLGLNDETMVLSVFIGK	Oxidation@12	MDA_143_FTMSms2hcd	53.249	1	62.6	5.3e-17	1	123908	HUMAN	Exportin-7
[17]	Q9UIA9	Oxidation	M	639	-	52	44.8	9.51	5.3e-17	900.179	4	2.2	LSAVQFMLNNHTSEHFSFLGINNQSNLTDMR	Oxidation@7;Oxidation@30	MDA_143_FTMSms2hcd	42.394	1	50.6	3.1e-14	1	123908	HUMAN	Exportin-7
[17]	Q9UIA9	Oxidation	M	662	-	52	44.8	9.51	5.3e-17	900.179	4	2.2	LSAVQFMLNNHTSEHFSFLGINNQSNLTDMR	Oxidation@7;Oxidation@30	MDA_143_FTMSms2hcd	42.394	1	50.6	3.1e-14	1	123908	HUMAN	Exportin-7
[17]	Q9UIA9	Oxidation	M	775	-	52	44.8	9.51	5.3e-17	366.863	3	0.46	LMAELVHNR	Oxidation@2	MDA_143_FTMSms2hcd	20.764	2	41.4	1.1e-08	1	123908	HUMAN	Exportin-7
[17]	Q9UIA9	Oxidation	M	805	-	52	44.8	9.51	5.3e-17	509.229	2	1.1	MITMYGNR	Oxidation@1;Oxidation@4	MDA_143_FTMSms2hcd	17.587	1	34.6	2e-07	1	123908	HUMAN	Exportin-7
[17]	Q9UIA9	Oxidation	M	808	-	52	44.8	9.51	5.3e-17	509.229	2	1.1	MITMYGNR	Oxidation@1;Oxidation@4	MDA_143_FTMSms2hcd	17.587	1	34.6	2e-07	1	123908	HUMAN	Exportin-7
[17]	Q9UIA9	Oxidation	M	1001	-	52	44.8	9.51	5.3e-17	710.059	3	2.6	NQWSMSRPLLGLILLNEK	Oxidation@5	MDA_143_FTMSms2hcd	48.072	1	15.3	0.0025	1	123908	HUMAN	Exportin-7
[17]	Q9UIA9	Oxidation	M	1085	-	52	44.8	9.51	5.3e-17	726.276	2	1.8	NSTYGVNSNDMMS	Oxidation@11;Oxidation@12	MDA_143_FTMSms2hcd	19.426	1	36.5	1.4e-14	1	123908	HUMAN	Exportin-7
[17]	Q9UIA9	Oxidation	M	1086	-	52	44.8	9.51	5.3e-17	726.276	2	1.8	NSTYGVNSNDMMS	Oxidation@11;Oxidation@12	MDA_143_FTMSms2hcd	19.426	1	36.5	1.4e-14	1	123908	HUMAN	Exportin-7
[18]	P26639	Acetyl	K	366	-	51	52.8	10.09	4.4e-18	850.41	3	-5.3	SEYRKRGFQEVVTPNIFNSR	Acetyl@5;Phospho@13|19	MDA_143_FTMSms2hcd	44.867	1	16.4	0.011	1	83435.8	HUMAN	Threonine--tRNA ligase 1, cytoplasmic
[18]	P26639	Gln->pyro-Glu	Q	518	-	51	52.8	10.09	4.4e-18	695.829	2	1.6	QLENSLNEFGEK	Gln->pyro-Glu@1	MDA_143_FTMSms2hcd	37.767	1	42.2	2.5e-09	1	83435.8	HUMAN	Threonine--tRNA ligase 1, cytoplasmic
[18]	P26639	Gln->pyro-Glu	Q	639	-	51	52.8	10.09	4.4e-18	428.701	2	-0.31	QQFHDAK	Gln->pyro-Glu@1	MDA_143_FTMSms2hcd	16.069	1	33.7	7.8e-08	1	83435.8	HUMAN	Threonine--tRNA ligase 1, cytoplasmic
[18]	P26639	Oxidation	M	13	-	51	52.8	10.09	4.4e-18	724.341	2	1.5	MGGEEKPIGAGEEK	Oxidation@1	MDA_143_FTMSms2hcd	15.673	1	59.6	8.6e-12	1	83435.8	HUMAN	Threonine--tRNA ligase 1, cytoplasmic
[18]	P26639	Oxidation	M	161	-	51	52.8	10.09	4.4e-18	952.407	3	1.2	FEDEEAQAVYWHSSAHIMGEAMER	Oxidation@18;Oxidation@22	MDA_143_FTMSms2hcd	30.913	1	68.5	2.4e-16	1	83435.8	HUMAN	Threonine--tRNA ligase 1, cytoplasmic
[18]	P26639	Oxidation	M	165	-	51	52.8	10.09	4.4e-18	952.407	3	1.2	FEDEEAQAVYWHSSAHIMGEAMER	Oxidation@18;Oxidation@22	MDA_143_FTMSms2hcd	30.913	1	68.5	2.4e-16	1	83435.8	HUMAN	Threonine--tRNA ligase 1, cytoplasmic
[18]	P26639	Oxidation	M	229	-	51	52.8	10.09	4.4e-18	366.207	3	0.23	KETLLAMFK	Oxidation@7	MDA_143_FTMSms2hcd	30.18	1	28.4	5.3e-08	1	83435.8	HUMAN	Threonine--tRNA ligase 1, cytoplasmic
[18]	P26639	Oxidation	M	291	-	51	52.8	10.09	4.4e-18	677.975	3	1.5	NSSTYWEGKADMETLQR	Oxidation@12	MDA_143_FTMSms2hcd	26.62	1	68	1e-14	1	83435.8	HUMAN	Threonine--tRNA ligase 1, cytoplasmic
[18]	P26639	Oxidation	M	307	-	51	52.8	10.09	4.4e-18	490.25	2	1.4	MLKEWEK	Oxidation@1	MDA_143_FTMSms2hcd	18.358	1	32.5	9.1e-06	1	83435.8	HUMAN	Threonine--tRNA ligase 1, cytoplasmic
[18]	P26639	Oxidation	M	384	-	51	52.8	10.09	4.4e-18	702.057	4	0.061	LWMTSGHWQHYSENMFSFEVEK	Oxidation@3;Oxidation@15	MDA_143_FTMSms2hcd	36.705	1	24.3	2.5e-05	1	83435.8	HUMAN	Threonine--tRNA ligase 1, cytoplasmic
[18]	P26639	Oxidation	M	396	-	51	52.8	10.09	4.4e-18	702.057	4	0.061	LWMTSGHWQHYSENMFSFEVEK	Oxidation@3;Oxidation@15	MDA_143_FTMSms2hcd	36.705	1	24.3	2.5e-05	1	83435.8	HUMAN	Threonine--tRNA ligase 1, cytoplasmic
[18]	P26639	Oxidation	M	600	-	51	52.8	10.09	4.4e-18	663.343	2	1	MIAILTENYGGK	Oxidation@1	MDA_143_FTMSms2hcd	32.742	1	45	8.5e-11	1	83435.8	HUMAN	Threonine--tRNA ligase 1, cytoplasmic
[19]	P13010	Acetyl	K	603	-	49	63.7	9.96	7.9e-18	378.753	2	0.69	VLVKQK	Acetyl@4	MDA_143_FTMSms2hcd	24.975	1	15.6	0.029	1	82705.3	HUMAN	X-ray repair cross-complementing protein 5
[19]	P13010	Gln->pyro-Glu	Q	45	-	49	63.7	9.96	7.9e-18	1348.99	3	1.2	QVFAENKDEIALVLFGTDGTDNPLSGGDQYQNITVHR	Gln->pyro-Glu@1	MDA_143_FTMSms2hcd	51.855	1	90.3	8.4e-17	1	82705.3	HUMAN	X-ray repair cross-complementing protein 5
[19]	P13010	Oxidation	M	40	-	49	63.7	9.96	7.9e-18	379.887	3	0.85	KVITMFVQR	Oxidation@5	MDA_143_FTMSms2hcd	24.354	1	32.6	5e-08	1	82705.3	HUMAN	X-ray repair cross-complementing protein 5
[19]	P13010	Oxidation	M	84	-	49	63.7	9.96	7.9e-18	965.979	2	1.8	HLMLPDFDLLEDIESK	Oxidation@3	MDA_143_FTMSms2hcd	49.608	1	59.8	1.1e-11	1	82705.3	HUMAN	X-ray repair cross-complementing protein 5
[19]	P13010	Oxidation	M	115	-	49	63.7	9.96	7.9e-18	1023.86	3	2.9	IQPGSQQADFLDALIVSMDVIQHETIGK	Oxidation@18	MDA_143_FTMSms2hcd	54.771	1	63.4	2.3e-11	1	82705.3	HUMAN	X-ray repair cross-complementing protein 5
[19]	P13010	Oxidation	M	210	-	49	63.7	9.96	7.9e-18	927.441	3	2.4	MVMISLEGEDGLDEIYSFSESLRK	Oxidation@1;Oxidation@3	MDA_143_FTMSms2hcd	49.194	1	67.9	5.5e-17	1	82705.3	HUMAN	X-ray repair cross-complementing protein 5
[19]	P13010	Oxidation	M	212	-	49	63.7	9.96	7.9e-18	927.441	3	2.4	MVMISLEGEDGLDEIYSFSESLRK	Oxidation@1;Oxidation@3	MDA_143_FTMSms2hcd	49.194	1	67.9	5.5e-17	1	82705.3	HUMAN	X-ray repair cross-complementing protein 5
[19]	P13010	Oxidation	M	357	-	49	63.7	9.96	7.9e-18	419.226	3	1	RFFMGNQVLK	Oxidation@4	MDA_143_FTMSms2hcd	27.317	1	22.9	2.8e-05	1	82705.3	HUMAN	X-ray repair cross-complementing protein 5
[19]	P13010	Oxidation	M	434	-	49	63.7	9.96	7.9e-18	510.248	2	1.3	QYMFSSLK	Oxidation@3	MDA_143_FTMSms2hcd	27.628	1	26.1	8.7e-07	1	82705.3	HUMAN	X-ray repair cross-complementing protein 5
[19]	P13010	Oxidation	M	461	-	49	63.7	9.96	7.9e-18	822.426	3	1.4	KYAPTEAQLNAVDALIDSMSLAK	Oxidation@19	MDA_143_FTMSms2hcd	44.277	1	57	3.5e-12	1	82705.3	HUMAN	X-ray repair cross-complementing protein 5
[19]	P13010	Oxidation	M	515	-	49	63.7	9.96	7.9e-18	890.466	3	2.5	EPLPPIQQHIWNMLNPPAEVTTK	Oxidation@13	MDA_143_FTMSms2hcd	42.694	1	40	4.7e-10	1	82705.3	HUMAN	X-ray repair cross-complementing protein 5
[19]	P13010	Oxidation	M	633	-	49	63.7	9.96	7.9e-18	865.917	4	2.2	KASFEEASNQLINHIEQFLDTNETPYFMK	Oxidation@28	MDA_143_FTMSms2hcd	53.807	1	26.9	3.1e-07	1	82705.3	HUMAN	X-ray repair cross-complementing protein 5
[19]	P13010	Oxidation	M	731	-	49	63.7	9.96	7.9e-18	1263.07	2	1.2	DKPSGDTAAVFEEGGDVDDLLDMI	Oxidation@23	MDA_143_FTMSms2hcd	49.65	1	47.1	2e-12	1	82705.3	HUMAN	X-ray repair cross-complementing protein 5
[19-1]	Q13617	Met-loss+Acetyl	M	1	19	38	48.1	8.92	6.4e-16	321.7	2	0.29	MSLKPR	Met-loss+Acetyl@1=19	MDA_143_FTMSms2hcd	16.3	1	25.4	0.012	1	86983.9	HUMAN	Cullin-2
[19-1]	Q13617	Oxidation	M	26	-	38	48.1	8.92	6.4e-16	612.817	2	-1.3	AVVMLEYVER	Oxidation@4	MDA_143_FTMSms2hcd	32.193	1	43.9	4.3e-09	1	86983.9	HUMAN	Cullin-2
[19-1]	Q13617	Oxidation	M	86	-	38	48.1	8.92	6.4e-16	583.296	3	2.4	VLESEEQVLVMYHR	Oxidation@11	MDA_143_FTMSms2hcd	31.703	1	50.9	2.6e-12	1	86983.9	HUMAN	Cullin-2
[19-1]	Q13617	Oxidation	M	151	-	38	48.1	8.92	6.4e-16	513.982	3	1.9	KLMVEPLQAILIR	Oxidation@3	MDA_143_FTMSms2hcd	43.264	1	47.9	1.6e-07	1	86983.9	HUMAN	Cullin-2
[19-1]	Q13617	Oxidation	M	294	-	38	48.1	8.92	6.4e-16	500.584	3	1.6	KNDMANMYVLLR	Oxidation@4;Oxidation@7	MDA_143_FTMSms2hcd	28.623	1	37.4	2e-06	1	86983.9	HUMAN	Cullin-2
[19-1]	Q13617	Oxidation	M	297	-	38	48.1	8.92	6.4e-16	500.584	3	1.6	KNDMANMYVLLR	Oxidation@4;Oxidation@7	MDA_143_FTMSms2hcd	28.623	1	37.4	2e-06	1	86983.9	HUMAN	Cullin-2
[19-1]	Q13617	Oxidation	M	311	-	38	48.1	8.92	6.4e-16	653.583	4	1.8	AVSTGLPHMIQELQNHIHDEGLR	Oxidation@9	MDA_143_FTMSms2hcd	36.253	1	57.1	8.8e-13	1	86983.9	HUMAN	Cullin-2
[19-1]	Q13617	Oxidation	M	365	-	38	48.1	8.92	6.4e-16	802.743	3	0.68	FVQLINTVLNGDQHFMSALDK	Oxidation@16	MDA_143_FTMSms2hcd	45.897	1	66	6.4e-16	1	86983.9	HUMAN	Cullin-2
[19-1]	Q13617	Oxidation	M	406	-	38	48.1	8.92	6.4e-16	598.248	2	-0.36	GMTENEVEDR	Oxidation@2	MDA_143_FTMSms2hcd	15.256	1	39.9	1.2e-10	1	86983.9	HUMAN	Cullin-2
[19-1]	Q13617	Oxidation	M	476	-	38	48.1	8.92	6.4e-16	810.849	2	1.6	MYTDMSVSADLNNK	Oxidation@1;Oxidation@5	MDA_143_FTMSms2hcd	24.902	1	51.8	3.6e-13	1	86983.9	HUMAN	Cullin-2
[19-1]	Q13617	Oxidation	M	480	-	38	48.1	8.92	6.4e-16	810.849	2	1.6	MYTDMSVSADLNNK	Oxidation@1;Oxidation@5	MDA_143_FTMSms2hcd	24.902	1	51.8	3.6e-13	1	86983.9	HUMAN	Cullin-2
[19-1]	Q13617	Oxidation	M	539	-	38	48.1	8.92	6.4e-16	660.31	3	2.5	SVQMFELFYSQHFSGR	Oxidation@4	MDA_143_FTMSms2hcd	40.648	1	52.4	8e-12	1	86983.9	HUMAN	Cullin-2
[19-1]	Q13617	Oxidation	M	605	-	38	48.1	8.92	6.4e-16	669.795	2	-0.64	ELQDSTQMNEK	Oxidation@8	MDA_143_FTMSms2hcd	14.26	1	47.3	4.7e-12	1	86983.9	HUMAN	Cullin-2
[19-1]	Q13617	Oxidation	M	665	-	38	48.1	8.92	6.4e-16	625.769	2	-0.19	DTPQEMEQTR	Oxidation@6	MDA_143_FTMSms2hcd	13.904	1	46.6	2.8e-10	1	86983.9	HUMAN	Cullin-2
[19-1]	Q13617	Oxidation	M	717	-	38	48.1	8.92	6.4e-16	526.777	2	2.3	FNPSISMIK	Oxidation@7	MDA_143_FTMSms2hcd	29.493	1	37.6	7.3e-08	1	86983.9	HUMAN	Cullin-2
[20]	P53618	Gln->pyro-Glu	Q	637	-	49	51.1	9.91	9.4e-18	550.775	2	1.5	QSLSHMLSAK	Gln->pyro-Glu@1;Oxidation@6	MDA_143_FTMSms2hcd	23.464	1	46.2	9.8e-10	1	107143	HUMAN	Coatomer subunit beta
[20]	P53618	Oxidation	M	48	-	49	51.1	9.91	9.4e-18	573.335	2	2.2	VIIMILNGEK	Oxidation@4	MDA_143_FTMSms2hcd	35.934	1	30.3	8.2e-06	1	107143	HUMAN	Coatomer subunit beta
[20]	P53618	Oxidation	M	60	-	49	51.1	9.91	9.4e-18	757.12	3	3.4	VIIMILNGEKLPGLLMTIIR	Oxidation@4;Oxidation@16	MDA_143_FTMSms2hcd	54.454	1	58.3	4.5e-14	1	107143	HUMAN	Coatomer subunit beta
[20]	P53618	Oxidation	M	137	-	49	51.1	9.91	9.4e-18	869.994	2	1.7	LKEAELLEPLMPAIR	Oxidation@11	MDA_143_FTMSms2hcd	39.455	1	52.8	4.5e-12	1	107143	HUMAN	Coatomer subunit beta
[20]	P53618	Oxidation	M	195	-	49	51.1	9.91	9.4e-18	531.91	3	0.2	NAFMMLIHADQDR	Oxidation@4;Oxidation@5	MDA_143_FTMSms2hcd	32.111	1	35.4	2.9e-08	1	107143	HUMAN	Coatomer subunit beta
[20]	P53618	Oxidation	M	196	-	49	51.1	9.91	9.4e-18	531.91	3	0.2	NAFMMLIHADQDR	Oxidation@4;Oxidation@5	MDA_143_FTMSms2hcd	32.111	1	35.4	2.9e-08	1	107143	HUMAN	Coatomer subunit beta
[20]	P53618	Oxidation	M	323	-	49	51.1	9.91	9.4e-18	665.875	2	2	VLQDLVMDILR	Oxidation@7	MDA_143_FTMSms2hcd	47.925	1	40.3	9.3e-08	1	107143	HUMAN	Coatomer subunit beta
[20]	P53618	Oxidation	M	436	-	49	51.1	9.91	9.4e-18	374.718	2	1.6	MLIVEK	Oxidation@1	MDA_143_FTMSms2hcd	21.37	1	17.1	5.4e-05	1	107143	HUMAN	Coatomer subunit beta
[20]	P53618	Oxidation	M	442	-	49	51.1	9.91	9.4e-18	368.536	3	0.15	MLEVFHAIK	Oxidation@1	MDA_143_FTMSms2hcd	30.575	1	31.9	4.9e-08	1	107143	HUMAN	Coatomer subunit beta
[20]	P53618	Oxidation	M	476	-	49	51.1	9.91	9.4e-18	668.825	2	0.76	EDIQSVMTEIR	Oxidation@7	MDA_143_FTMSms2hcd	28.13	1	43.5	7.7e-09	1	107143	HUMAN	Coatomer subunit beta
[20]	P53618	Oxidation	M	518	-	49	51.1	9.91	9.4e-18	748.712	3	2	LVTEMGTYATQSALSSSRPTK	Oxidation@5	MDA_143_FTMSms2hcd	26.564	1	65.1	1.7e-17	1	107143	HUMAN	Coatomer subunit beta
[20]	P53618	Oxidation	M	586	-	49	51.1	9.91	9.4e-18	619.593	4	1.4	KKQNSFVAEAMLLMATILHLGK	Oxidation@11;Oxidation@14	MDA_143_FTMSms2hcd	50.179	1	46.8	8.3e-13	1	107143	HUMAN	Coatomer subunit beta
[20]	P53618	Oxidation	M	589	-	49	51.1	9.91	9.4e-18	619.593	4	1.4	KKQNSFVAEAMLLMATILHLGK	Oxidation@11;Oxidation@14	MDA_143_FTMSms2hcd	50.179	1	46.8	8.3e-13	1	107143	HUMAN	Coatomer subunit beta
[20]	P53618	Oxidation	M	642	-	49	51.1	9.91	9.4e-18	550.775	2	1.5	QSLSHMLSAK	Gln->pyro-Glu@1;Oxidation@6	MDA_143_FTMSms2hcd	23.464	1	46.2	9.8e-10	1	107143	HUMAN	Coatomer subunit beta
[20]	P53618	Oxidation	M	674	-	49	51.1	9.91	9.4e-18	674.009	3	2.7	NVTVQPDDPISFMQLTAK	Oxidation@13	MDA_143_FTMSms2hcd	40.045	1	40.7	6.9e-10	1	107143	HUMAN	Coatomer subunit beta
[20]	P53618	Oxidation	M	859	-	49	51.1	9.91	9.4e-18	749.389	3	2.3	VTVNTNMVDLNDYLQHILK	Oxidation@7	MDA_143_FTMSms2hcd	46.785	1	56.9	1e-13	1	107143	HUMAN	Coatomer subunit beta
[20]	P53618	Oxidation	M	936	-	49	51.1	9.91	9.4e-18	561.776	2	-0.74	SQGMALSLGDK	Oxidation@4	MDA_143_FTMSms2hcd	23.498	1	36.9	4.7e-09	1	107143	HUMAN	Coatomer subunit beta
[20]	P53618	Phospho	T	477	12	49	51.1	9.91	9.4e-18	1183.23	3	3.9	IYRGALWILGEYCSTKEDIQSVMTEIRR	Phospho@24=12;Phospho@2|12|14|15	MDA_143_FTMSms2hcd	45.822	1	16.3	0.00097	1	107143	HUMAN	Coatomer subunit beta
[21]	O43592	Gln->pyro-Glu	Q	558	-	43	39	10.86	1.7e-19	744.862	2	1.2	QMNPFIEDILNR	Gln->pyro-Glu@1;Oxidation@2	MDA_143_FTMSms2hcd	50.457	1	48.6	1.1e-09	1	109965	HUMAN	Exportin-T
[21]	O43592	Oxidation	M	91	-	43	39	10.86	1.7e-19	1071.55	2	2.4	ETLISWLQAQMLNPQPEK	Oxidation@11	MDA_143_FTMSms2hcd	47.87	1	61.4	3.8e-13	1	109965	HUMAN	Exportin-T
[21]	O43592	Oxidation	M	147	-	43	39	10.86	1.7e-19	695.868	2	2.8	ILMAIDSELVDR	Oxidation@3	MDA_143_FTMSms2hcd	36.095	1	49	8.7e-10	1	109965	HUMAN	Exportin-T
[21]	O43592	Oxidation	M	229	-	43	39	10.86	1.7e-19	602.321	3	2.5	FINMLLGHMSIEVLR	Oxidation@4;Oxidation@9	MDA_143_FTMSms2hcd	40.271	1	65	1.3e-09	1	109965	HUMAN	Exportin-T
[21]	O43592	Oxidation	M	234	-	43	39	10.86	1.7e-19	602.321	3	2.5	FINMLLGHMSIEVLR	Oxidation@4;Oxidation@9	MDA_143_FTMSms2hcd	40.271	1	65	1.3e-09	1	109965	HUMAN	Exportin-T
[21]	O43592	Oxidation	M	298	-	43	39	10.86	1.7e-19	817.935	2	3	LVNGMGQSLIVSWSK	Oxidation@5	MDA_143_FTMSms2hcd	37.597	1	55.9	1.6e-11	1	109965	HUMAN	Exportin-T
[21]	O43592	Oxidation	M	376	-	43	39	10.86	1.7e-19	661.347	2	1.1	ANVEAIMLAVMK	Oxidation@7;Oxidation@11	MDA_143_FTMSms2hcd	33.304	1	39.4	1.6e-09	1	109965	HUMAN	Exportin-T
[21]	O43592	Oxidation	M	380	-	43	39	10.86	1.7e-19	661.347	2	1.1	ANVEAIMLAVMK	Oxidation@7;Oxidation@11	MDA_143_FTMSms2hcd	33.304	1	39.4	1.6e-09	1	109965	HUMAN	Exportin-T
[21]	O43592	Oxidation	M	400	-	43	39	10.86	1.7e-19	1012.76	3	2.1	KLTYDEEYNFENEGEDEAMFVEYR	Oxidation@19	MDA_143_FTMSms2hcd	37.567	1	68.7	2.6e-18	1	109965	HUMAN	Exportin-T
[21]	O43592	Oxidation	M	444	-	43	39	10.86	1.7e-19	555.287	2	1.4	FMEVEVAIR	Oxidation@2	MDA_143_FTMSms2hcd	31.918	1	38.7	1.7e-07	1	109965	HUMAN	Exportin-T
[21]	O43592	Oxidation	M	455	-	43	39	10.86	1.7e-19	820.087	3	1.6	LLYMLAEALPVSHGAHFSGDVSK	Oxidation@4	MDA_143_FTMSms2hcd	40.242	1	70.7	1.2e-13	1	109965	HUMAN	Exportin-T
[21]	O43592	Oxidation	M	481	-	43	39	10.86	1.7e-19	527.737	2	0.32	ASALQDMMR	Oxidation@7;Oxidation@8	MDA_143_FTMSms2hcd	16.074	1	42	1.8e-11	1	109965	HUMAN	Exportin-T
[21]	O43592	Oxidation	M	482	-	43	39	10.86	1.7e-19	527.737	2	0.32	ASALQDMMR	Oxidation@7;Oxidation@8	MDA_143_FTMSms2hcd	16.074	1	42	1.8e-11	1	109965	HUMAN	Exportin-T
[21]	O43592	Oxidation	M	559	-	43	39	10.86	1.7e-19	744.862	2	1.2	QMNPFIEDILNR	Gln->pyro-Glu@1;Oxidation@2	MDA_143_FTMSms2hcd	50.457	1	48.6	1.1e-09	1	109965	HUMAN	Exportin-T
[21]	O43592	Oxidation	M	625	-	43	39	10.86	1.7e-19	537.797	2	0.71	NLLTPLMEK	Oxidation@7	MDA_143_FTMSms2hcd	32.985	1	39.8	2.4e-06	1	109965	HUMAN	Exportin-T
[21]	O43592	Oxidation	M	636	-	43	39	10.86	1.7e-19	560.769	2	0.91	LMLAQDEER	Oxidation@2	MDA_143_FTMSms2hcd	22.246	1	31.8	2e-06	1	109965	HUMAN	Exportin-T
[21]	O43592	Oxidation	M	810	-	43	39	10.86	1.7e-19	1059.85	3	2.5	RSYFAFLQTVTGSGMSEVIANQGAENVER	Oxidation@15	MDA_143_FTMSms2hcd	43.562	1	54.8	1.5e-12	1	109965	HUMAN	Exportin-T
[22]	P54136	Oxidation	M	73	-	50	52.3	9.6	3.6e-17	488.766	2	0.92	NMINIISR	Oxidation@2	MDA_143_FTMSms2hcd	26.796	1	19.6	0.00026	1	75379.7	HUMAN	Arginine--tRNA ligase, cytoplasmic
[22]	P54136	Oxidation	M	207	-	50	52.3	9.6	3.6e-17	332.168	3	-0.77	EMHVGHLR	Oxidation@2	MDA_143_FTMSms2hcd	13.536	1	38.5	1.8e-07	1	75379.7	HUMAN	Arginine--tRNA ligase, cytoplasmic
[22]	P54136	Oxidation	M	342	-	50	52.3	9.6	3.6e-17	706.33	2	0.79	MNDIVKEFEDR	Oxidation@1	MDA_143_FTMSms2hcd	30.373	1	46.1	4.9e-10	1	75379.7	HUMAN	Arginine--tRNA ligase, cytoplasmic
[22]	P54136	Oxidation	M	463	-	50	52.3	9.6	3.6e-17	552.803	2	1.3	LMDLLGEGLK	Oxidation@2	MDA_143_FTMSms2hcd	35.366	1	39.2	3.4e-07	1	75379.7	HUMAN	Arginine--tRNA ligase, cytoplasmic
[22]	P54136	Oxidation	M	523	-	50	52.3	9.6	3.6e-17	703.016	3	3.2	MLDDRGNTAAYLLYAFTR	Oxidation@1	MDA_143_FTMSms2hcd	47.616	1	55.4	1.1e-11	1	75379.7	HUMAN	Arginine--tRNA ligase, cytoplasmic
[22]	P54136	Oxidation	M	554	-	50	52.3	9.6	3.6e-17	660.33	2	1.2	LANIDEEMLQK	Oxidation@8	MDA_143_FTMSms2hcd	26.366	1	49	3.1e-11	1	75379.7	HUMAN	Arginine--tRNA ligase, cytoplasmic
[22]	P54136	Oxidation	M	632	-	50	52.3	9.6	3.6e-17	361.176	2	-0.39	VNMWR	Oxidation@3	MDA_143_FTMSms2hcd	16.855	1	22.5	0.0001	1	75379.7	HUMAN	Arginine--tRNA ligase, cytoplasmic
[23]	Q14974	Oxidation	M	1	-	43	39.7	11.11	5.7e-20	553.313	2	1.1	MELITILEK	Oxidation@1	MDA_143_FTMSms2hcd	38.311	1	25.4	0.00011	1	97171.1	HUMAN	Importin subunit beta-1
[23]	Q14974	Oxidation	M	181	-	43	39.7	11.11	5.7e-20	731.392	2	2	SNEILTAIIQGMR	Oxidation@12	MDA_143_FTMSms2hcd	42.73	1	52.9	6.3e-12	1	97171.1	HUMAN	Importin subunit beta-1
[23]	Q14974	Oxidation	M	533	-	43	39.7	11.11	5.7e-20	686.838	2	1.4	SSAYESLMEIVK	Oxidation@8	MDA_143_FTMSms2hcd	37.051	1	43.5	1.1e-13	1	97171.1	HUMAN	Importin subunit beta-1
[23]	Q14974	Oxidation	M	555	-	43	39.7	11.11	5.7e-20	489.769	2	0.9	TTLVIMER	Oxidation@6	MDA_143_FTMSms2hcd	25.683	1	33.1	1.2e-08	1	97171.1	HUMAN	Importin subunit beta-1
[23]	Q14974	Oxidation	M	564	-	43	39.7	11.11	5.7e-20	1008.5	2	1.7	LQQVLQMESHIQSTSDR	Oxidation@7	MDA_143_FTMSms2hcd	25.222	1	74.5	1.4e-15	1	97171.1	HUMAN	Importin subunit beta-1
[23]	Q14974	Oxidation	M	608	-	43	39.7	11.11	5.7e-20	756.413	3	2.6	KVQHQDALQISDVVMASLLR	Oxidation@15	MDA_143_FTMSms2hcd	41.251	1	59.5	1.4e-11	1	97171.1	HUMAN	Importin subunit beta-1
[23]	Q14974	Oxidation	M	647	-	43	39.7	11.11	5.7e-20	815.44	2	1.5	YMEAFKPFLGIGLK	Oxidation@2	MDA_143_FTMSms2hcd	42.522	1	52.3	7.7e-11	1	97171.1	HUMAN	Importin subunit beta-1
[23]	Q14974	Oxidation	M	754	-	43	39.7	11.11	5.7e-20	1259.62	3	1.2	YLEVVLNTLQQASQAQVDKSDYDMVDYLNELR	Oxidation@24	MDA_143_FTMSms2hcd	49.711	1	80.1	5.7e-20	1	97171.1	HUMAN	Importin subunit beta-1
[23]	Q14974	Oxidation	M	788	-	43	39.7	11.11	5.7e-20	925.448	2	1.3	GDQENVHPDVMLVQPR	Oxidation@11	MDA_143_FTMSms2hcd	28.56	1	66.2	2e-14	1	97171.1	HUMAN	Importin subunit beta-1
[23]	Q14974	Oxidation	M	842	-	43	39.7	11.11	5.7e-20	627.341	3	1.4	LVEARPMIHELLTEGR	Oxidation@7	MDA_143_FTMSms2hcd	31.215	1	59	1.8e-09	1	97171.1	HUMAN	Importin subunit beta-1
[24]	P12956	Gln->pyro-Glu	Q	326	-	44	57	13.03	1.6e-23	580.985	3	1.3	QIILEKEETEELKR	Gln->pyro-Glu@1	MDA_143_FTMSms2hcd	32.712	1	57.8	6e-12	1	69843.7	HUMAN	X-ray repair cross-complementing protein 6
[24]	P12956	Gln->pyro-Glu	Q	597	-	44	57	13.03	1.6e-23	514.288	2	1.7	QELLEALTK	Gln->pyro-Glu@1	MDA_143_FTMSms2hcd	46.167	1	34.5	5.7e-07	1	69843.7	HUMAN	X-ray repair cross-complementing protein 6
[24]	P12956	Oxidation	M	167	-	44	57	13.03	1.6e-23	640.292	3	1.4	IMLFTNEDNPHGNDSAK	Oxidation@2	MDA_143_FTMSms2hcd	27.719	1	69.8	3.7e-17	1	69843.7	HUMAN	X-ray repair cross-complementing protein 6
[24]	P12956	Oxidation	M	203	-	44	57	13.03	1.6e-23	709.873	2	2.2	DTGIFLDLMHLK	Oxidation@9	MDA_143_FTMSms2hcd	42.396	1	51.6	4.1e-10	1	69843.7	HUMAN	X-ray repair cross-complementing protein 6
[24]	P12956	Oxidation	M	346	-	44	57	13.03	1.6e-23	689.375	3	1.2	FDDPGLMLMGFKPLVLLK	Oxidation@7;Oxidation@9	MDA_143_FTMSms2hcd	48.962	1	60.5	6.3e-14	1	69843.7	HUMAN	X-ray repair cross-complementing protein 6
[24]	P12956	Oxidation	M	348	-	44	57	13.03	1.6e-23	689.375	3	1.2	FDDPGLMLMGFKPLVLLK	Oxidation@7;Oxidation@9	MDA_143_FTMSms2hcd	48.962	1	60.5	6.3e-14	1	69843.7	HUMAN	X-ray repair cross-complementing protein 6
[24]	P12956	Oxidation	M	446	-	44	57	13.03	1.6e-23	448.731	2	0.12	KMPFTEK	Oxidation@2	MDA_143_FTMSms2hcd	15.035	1	22.1	4.5e-05	1	69843.7	HUMAN	X-ray repair cross-complementing protein 6
[24]	P12956	Oxidation	M	453	-	44	57	13.03	1.6e-23	545.285	2	1.1	IMATPEQVGK	Oxidation@2	MDA_143_FTMSms2hcd	20.623	2	46.9	3e-08	1	69843.7	HUMAN	X-ray repair cross-complementing protein 6
[24]	P12956	Oxidation	M	498	-	44	57	13.03	1.6e-23	1220.14	2	2	NLEALALDLMEPEQAVDLTLPK	Oxidation@10	MDA_143_FTMSms2hcd	51.601	1	66.8	6.4e-16	1	69843.7	HUMAN	X-ray repair cross-complementing protein 6
[24]	P12956	Oxidation	M	580	-	44	57	13.03	1.6e-23	426.238	2	-0.016	FTVPMLK	Oxidation@5	MDA_143_FTMSms2hcd	33.083	1	30.9	4.1e-06	1	69843.7	HUMAN	X-ray repair cross-complementing protein 6
[25]	P11216	Gln->pyro-Glu	Q	741	-	47	53.3	10.21	2.6e-18	747.369	2	2	QAVDQISSGFFSPK	Gln->pyro-Glu@1	MDA_143_FTMSms2hcd	43.073	1	46.4	2.7e-10	1	96696.8	HUMAN	Glycogen phosphorylase, brain form
[25]	P11216	Met-loss+Acetyl	M	1	8	47	53.3	10.21	2.6e-18	515.775	2	0.78	MAKPLTDSEK	Met-loss+Acetyl@1=8	MDA_143_FTMSms2hcd	18.828	1	42.2	3.2e-05	1	96696.8	HUMAN	Glycogen phosphorylase, brain form
[25]	P11216	Oxidation	M	92	-	47	53.3	10.21	2.6e-18	785.886	2	2.2	IYYLSLEFYMGR	Oxidation@10	MDA_143_FTMSms2hcd	44.692	1	44.3	5.3e-11	2	96696.8	HUMAN	Glycogen phosphorylase, brain form
[25]	P11216	Oxidation	M	198	-	47	53.3	10.21	2.6e-18	438.723	4	-0.029	ARPEYMLPVHFYGR	Oxidation@6	MDA_143_FTMSms2hcd	33.464	1	43.5	4.5e-10	1	96696.8	HUMAN	Glycogen phosphorylase, brain form
[25]	P11216	Oxidation	M	225	-	47	53.3	10.21	2.6e-18	1155.08	2	3.8	WLDTQVVLAMPYDTPVPGYK	Oxidation@10	MDA_143_FTMSms2hcd	44.681	1	55.5	3.3e-13	1	96696.8	HUMAN	Glycogen phosphorylase, brain form
[25]	P11216	Oxidation	M	351	-	47	53.3	10.21	2.6e-18	712.051	3	2.2	VAIQLNDTHPALSIPELMR	Oxidation@18	MDA_143_FTMSms2hcd	41.481	1	50.9	3.5e-11	1	96696.8	HUMAN	Glycogen phosphorylase, brain form
[25]	P11216	Oxidation	M	392	-	47	53.3	10.21	2.6e-18	520.251	2	2.1	WPVSMFEK	Oxidation@5	MDA_143_FTMSms2hcd	31.609	1	30.1	2.9e-06	1	96696.8	HUMAN	Glycogen phosphorylase, brain form
[25]	P11216	Oxidation	M	563	-	47	53.3	10.21	2.6e-18	463.9	3	1.5	INPSSMFDVHVK	Oxidation@6	MDA_143_FTMSms2hcd	28.921	1	46.5	6.8e-10	1	96696.8	HUMAN	Glycogen phosphorylase, brain form
[25]	P11216	Oxidation	M	616	-	47	53.3	10.21	2.6e-18	321.156	3	-1.1	AAPGYHMAK	Oxidation@7	MDA_143_FTMSms2hcd	13.279	1	23.2	6.1e-09	3	96696.8	HUMAN	Glycogen phosphorylase, brain form
[25]	P11216	Oxidation	M	680	-	47	53.3	10.21	2.6e-18	1232.11	2	1.7	VIPAADLSQQISTAGTEASGTGNMK	Oxidation@24	MDA_143_FTMSms2hcd	35.157	1	65.7	2.6e-18	1	96696.8	HUMAN	Glycogen phosphorylase, brain form
[25-1]	P06737	Met-loss+Acetyl	M	1	9	44	53.4	9.22	1.8e-16	536.288	2	0.61	MAKPLTDQEK	Met-loss+Acetyl@1=9	MDA_143_FTMSms2hcd	19.031	1	41.9	8e-06	1	97149.4	HUMAN	Glycogen phosphorylase, liver form
[25-1]	P06737	Oxidation	M	198	-	44	53.4	9.22	1.8e-16	575.293	3	1.5	SRPEFMLPVHFYGK	Oxidation@6	MDA_143_FTMSms2hcd	36.973	1	48.3	1.4e-09	1	97149.4	HUMAN	Glycogen phosphorylase, liver form
[25-1]	P06737	Oxidation	M	351	-	44	53.4	9.22	1.8e-16	1108.56	3	1.1	GAGTVFDAFPDQVAIQLNDTHPALAIPELMR	Oxidation@30	MDA_143_FTMSms2hcd	51.243	1	38.4	5.6e-12	1	97149.4	HUMAN	Glycogen phosphorylase, liver form
[25-1]	P06737	Oxidation	M	563	-	44	53.4	9.22	1.8e-16	690.846	2	2.1	INPSSMFDVQVK	Oxidation@6	MDA_143_FTMSms2hcd	31.277	1	44.4	5.9e-08	1	97149.4	HUMAN	Glycogen phosphorylase, liver form
[25-1]	P06737	Oxidation	M	616	-	44	53.4	9.22	1.8e-16	321.156	3	-1.1	AAPGYHMAK	Oxidation@7	MDA_143_FTMSms2hcd	13.279	1	23.2	6.1e-09	3	97149.4	HUMAN	Glycogen phosphorylase, liver form
[25-1]	P06737	Oxidation	M	636	-	44	53.4	9.22	1.8e-16	937.982	2	2.5	LITSVADVVNNDPMVGSK	Oxidation@14	MDA_143_FTMSms2hcd	35.691	1	59.8	1.8e-16	1	97149.4	HUMAN	Glycogen phosphorylase, liver form
[25-1]	P06737	Oxidation	M	680	-	44	53.4	9.22	1.8e-16	832.073	3	2.3	VIPATDLSEQISTAGTEASGTGNMK	Oxidation@24	MDA_143_FTMSms2hcd	35.4	1	47.4	1.2e-11	1	97149.4	HUMAN	Glycogen phosphorylase, liver form
[25-1]	P06737	Oxidation	M	765	-	44	53.4	9.22	1.8e-16	546.026	4	0.38	QPDLFKDIINMLFYHDR	Oxidation@11	MDA_143_FTMSms2hcd	55.359	1	18.6	6.2e-06	1	97149.4	HUMAN	Glycogen phosphorylase, liver form
[25-2]	P11217	Oxidation	M	92	-	13	15.3	7.05	1.9e-12	785.886	2	2.2	IYYLSLEFYMGR	Oxidation@10	MDA_143_FTMSms2hcd	44.692	1	44.3	5.3e-11	2	97092.9	HUMAN	Glycogen phosphorylase, muscle form
[25-2]	P11217	Oxidation	M	616	-	13	15.3	7.05	1.9e-12	321.156	3	-1.1	AAPGYHMAK	Oxidation@7	MDA_143_FTMSms2hcd	13.279	1	23.2	6.1e-09	3	97092.9	HUMAN	Glycogen phosphorylase, muscle form
[25-2]	P11217	Oxidation	M	680	-	13	15.3	7.05	1.9e-12	822.068	3	1.4	VIPAADLSEQISTAGTEASGTGNMK	Oxidation@24	MDA_143_FTMSms2hcd	37.5	1	31.8	6.8e-08	1	97092.9	HUMAN	Glycogen phosphorylase, muscle form
[26]	Q14566	Gln->pyro-Glu	Q	518	-	52	51.2	7.94	4.3e-14	671.844	2	1.8	QNINLSAPIMSR	Gln->pyro-Glu@1;Oxidation@10	MDA_143_FTMSms2hcd	36.292	1	38.6	4.6e-08	1	92890.1	HUMAN	DNA replication licensing factor MCM6
[26]	Q14566	Oxidation	M	329	-	52	51.2	7.94	4.3e-14	567.032	4	0.82	ELRDEEQTAESIKNQMTVK	Oxidation@16	MDA_143_FTMSms2hcd	23.881	1	29.9	2.2e-06	1	92890.1	HUMAN	DNA replication licensing factor MCM6
[26]	Q14566	Oxidation	M	340	-	52	51.2	7.94	4.3e-14	500.226	2	0.35	VFEMSQDK	Oxidation@4	MDA_143_FTMSms2hcd	15.9	1	38.5	4.4e-10	1	92890.1	HUMAN	DNA replication licensing factor MCM6
[26]	Q14566	Oxidation	M	371	-	52	51.2	7.94	4.3e-14	623.866	2	1.5	GVLLMLFGGVPK	Oxidation@5	MDA_143_FTMSms2hcd	47.682	1	46.2	6.9e-09	1	92890.1	HUMAN	DNA replication licensing factor MCM6
[26]	Q14566	Oxidation	M	477	-	52	51.2	7.94	4.3e-14	686.679	3	2.4	DQVAIHEAMEQQTISITK	Oxidation@9	MDA_143_FTMSms2hcd	29.118	1	60.4	4.3e-14	1	92890.1	HUMAN	DNA replication licensing factor MCM6
[26]	Q14566	Oxidation	M	527	-	52	51.2	7.94	4.3e-14	671.844	2	1.8	QNINLSAPIMSR	Gln->pyro-Glu@1;Oxidation@10	MDA_143_FTMSms2hcd	36.292	1	38.6	4.6e-08	1	92890.1	HUMAN	DNA replication licensing factor MCM6
[26]	Q14566	Oxidation	M	624	-	52	51.2	7.94	4.3e-14	446.732	2	1.2	QLESMIR	Oxidation@5	MDA_143_FTMSms2hcd	19.799	1	27.6	2.6e-06	1	92890.1	HUMAN	DNA replication licensing factor MCM6
[26]	Q14566	Oxidation	M	631	-	52	51.2	7.94	4.3e-14	397.196	2	-2.4	LSEAMAR	Oxidation@5	MDA_143_FTMSms2hcd	14.221	1	21.9	0.00067	1	92890.1	HUMAN	DNA replication licensing factor MCM6
[26-1]	P49736	Gln->pyro-Glu	Q	871	-	18	26.2	7.51	2.7e-13	1025.51	2	0.13	QINIHNLSAFYDSELFR	Gln->pyro-Glu@1	MDA_143_FTMSms2hcd	51.292	1	58	1.5e-11	1	101897	HUMAN	DNA replication licensing factor MCM2
[26-1]	P49736	Oxidation	M	463	-	18	26.2	7.51	2.7e-13	684.352	3	-8.5	VAVGELTDEDVKMITSLSK	Oxidation@13	MDA_143_FTMSms2hcd	54.485	1	18.2	0.015	1	101897	HUMAN	DNA replication licensing factor MCM2
[26-1]	P49736	Oxidation	M	604	-	18	26.2	7.51	2.7e-13	602.297	3	1.5	TSIHEAMEQQSISISK	Oxidation@7	MDA_143_FTMSms2hcd	23.956	1	41.9	2.4e-08	1	101897	HUMAN	DNA replication licensing factor MCM2
[26-1]	P49736	Oxidation	M	674	-	18	26.2	7.51	2.7e-13	752.852	2	0.88	DTVDPVQDEMLAR	Oxidation@10	MDA_143_FTMSms2hcd	28.347	1	47	3.1e-11	1	101897	HUMAN	DNA replication licensing factor MCM2
[26-1]	P49736	Oxidation	M	755	-	18	26.2	7.51	2.7e-13	689.356	2	-0.086	ESMATGSIPITVR	Oxidation@3	MDA_143_FTMSms2hcd	30.65	1	27.4	3.4e-08	1	101897	HUMAN	DNA replication licensing factor MCM2
[27]	P56192	Gln->pyro-Glu	Q	192	-	45	42.1	8.81	1e-15	748.935	2	3	QQGVLALRPYLQK	Gln->pyro-Glu@1	MDA_143_FTMSms2hcd	40.769	1	35.1	2.5e-08	1	101117	HUMAN	Methionine--tRNA ligase, cytoplasmic
[27]	P56192	Gln->pyro-Glu	Q	205	-	45	42.1	8.81	1e-15	525.255	2	1.4	QPQPSPAEGR	Gln->pyro-Glu@1	MDA_143_FTMSms2hcd	20.022	1	47.1	1.7e-10	1	101117	HUMAN	Methionine--tRNA ligase, cytoplasmic
[27]	P56192	Gln->pyro-Glu	Q	882	-	45	42.1	8.81	1e-15	709.389	2	1.4	QLAVAEGKPPEAPK	Gln->pyro-Glu@1	MDA_143_FTMSms2hcd	29.922	1	56.2	3.2e-13	1	101117	HUMAN	Methionine--tRNA ligase, cytoplasmic
[27]	P56192	Oxidation	M	235	-	45	42.1	8.81	1e-15	1045.83	3	3.4	AVTNEPEEEELATLSEEEIAMAVTAWEK	Oxidation@21	MDA_143_FTMSms2hcd	57.774	1	60.7	1e-15	1	101117	HUMAN	Methionine--tRNA ligase, cytoplasmic
[27]	P56192	Oxidation	M	552	-	45	42.1	8.81	1e-15	799.882	2	2.5	NPEQVDLYQFMAK	Oxidation@11	MDA_143_FTMSms2hcd	34.604	1	59.4	2.3e-15	1	101117	HUMAN	Methionine--tRNA ligase, cytoplasmic
[27]	P56192	Oxidation	M	606	-	45	42.1	8.81	1e-15	1061.01	2	1	GVGVFGDMAQDTGIPADIWR	Oxidation@8	MDA_143_FTMSms2hcd	45.125	1	69	1.1e-15	1	101117	HUMAN	Methionine--tRNA ligase, cytoplasmic
[27]	P56192	Oxidation	M	659	-	45	42.1	8.81	1e-15	378.191	2	-0.15	AGMFVSK	Oxidation@3	MDA_143_FTMSms2hcd	16.57	1	40.9	4.4e-08	1	101117	HUMAN	Methionine--tRNA ligase, cytoplasmic
[27]	P56192	Oxidation	M	672	-	45	42.1	8.81	1e-15	993.969	2	2.2	FFGGYVPEMVLTPDDQR	Oxidation@9	MDA_143_FTMSms2hcd	41.272	1	55.9	2.3e-13	1	101117	HUMAN	Methionine--tRNA ligase, cytoplasmic
[27]	P56192	Oxidation	M	846	-	45	42.1	8.81	1e-15	777.4	4	1.9	TSPKPAVVETVTTAKPQQIQALMDEVTK	Oxidation@23;Phospho@1|2	MDA_143_FTMSms2hcd	38.796	1	36.8	4.3e-10	1	101117	HUMAN	Methionine--tRNA ligase, cytoplasmic
[27-1]	Q9H0B6	Oxidation	M	242	-	21	39.2	7.99	3.5e-14	585.552	4	1.9	TSGHDHPDVATMLNILALVYR	Oxidation@12	MDA_143_FTMSms2hcd	46.778	1	44.3	1.6e-11	2	68935.2	HUMAN	Kinesin light chain 2
[27-1]	Q9H0B6	Phospho	S	582	8	21	39.2	7.99	3.5e-14	537.255	2	0.95	ASSLNFLNK	Phospho@3=8	MDA_143_FTMSms2hcd	33.567	1	31.4	4.2e-06	1	68935.2	HUMAN	Kinesin light chain 2
[28]	P25205	Met-loss+Acetyl	M	1	-	43	56.4	9.52	5.1e-17	664.857	2	1.3	MAGTVVLDDVELR	Met-loss+Acetyl@1	MDA_143_FTMSms2hcd	44.435	2	47	4.2e-08	1	90981.6	HUMAN	DNA replication licensing factor MCM3
[28]	P25205	Oxidation	M	204	-	43	56.4	9.52	5.1e-17	793.381	2	1.7	DHQTITIQEMPEK	Oxidation@10	MDA_143_FTMSms2hcd	23.203	1	51.1	8.7e-13	1	90981.6	HUMAN	DNA replication licensing factor MCM3
[28]	P25205	Oxidation	M	398	-	43	56.4	9.52	5.1e-17	439.903	3	0.99	RLEAGAMVLADR	Oxidation@7	MDA_143_FTMSms2hcd	24.976	1	35.5	5.5e-07	1	90981.6	HUMAN	DNA replication licensing factor MCM3
[28]	P25205	Oxidation	M	426	-	43	56.4	9.52	5.1e-17	643.812	2	1.4	TAIHEVMEQGR	Oxidation@7	MDA_143_FTMSms2hcd	17.514	1	57.6	7.2e-17	1	90981.6	HUMAN	DNA replication licensing factor MCM3
[28]	P25205	Oxidation	M	466	-	43	56.4	9.52	5.1e-17	845.429	2	2.1	TPMENIGLQDSLLSR	Oxidation@3	MDA_143_FTMSms2hcd	36.293	1	59.8	2.3e-11	1	90981.6	HUMAN	DNA replication licensing factor MCM3
[28]	P25205	Oxidation	M	485	-	43	56.4	9.52	5.1e-17	777.628	4	2.7	FDLLFIMLDQMDPEQDREISDHVLR	Oxidation@7;Oxidation@11	MDA_143_FTMSms2hcd	47.605	1	57.2	2.7e-13	1	90981.6	HUMAN	DNA replication licensing factor MCM3
[28]	P25205	Oxidation	M	489	-	43	56.4	9.52	5.1e-17	777.628	4	2.7	FDLLFIMLDQMDPEQDREISDHVLR	Oxidation@7;Oxidation@11	MDA_143_FTMSms2hcd	47.605	1	57.2	2.7e-13	1	90981.6	HUMAN	DNA replication licensing factor MCM3
[28]	P25205	Oxidation	M	562	-	43	56.4	9.52	5.1e-17	458.718	2	1.3	MVSAAFMK	Oxidation@1;Oxidation@7	MDA_143_FTMSms2hcd	20.7	1	27.2	1.3e-06	1	90981.6	HUMAN	DNA replication licensing factor MCM3
[28]	P25205	Oxidation	M	568	-	43	56.4	9.52	5.1e-17	458.718	2	1.3	MVSAAFMK	Oxidation@1;Oxidation@7	MDA_143_FTMSms2hcd	20.7	1	27.2	1.3e-06	1	90981.6	HUMAN	DNA replication licensing factor MCM3
[28]	P25205	Oxidation	M	765	-	43	56.4	9.52	5.1e-17	615.288	2	-0.18	EAHAQSIGMNR	Oxidation@9	MDA_143_FTMSms2hcd	13.887	1	36.6	7.9e-11	1	90981.6	HUMAN	DNA replication licensing factor MCM3
[28]	P25205	Phospho	S	672	16	43	56.4	9.52	5.1e-17	922.026	3	1.5	SEDESETEDEEEKSQEDQEQKR	Phospho@5=16	MDA_143_FTMSms2hcd	16.865	1	62.4	8.1e-15	1	90981.6	HUMAN	DNA replication licensing factor MCM3
[29]	P49368	Acetyl+Oxidation	M	1	-	49	56.3	10.21	2.7e-18	595.644	3	1.8	MMGHRPVLVLSQNTK	Acetyl+Oxidation@1;Oxidation@2	MDA_143_FTMSms2hcd	27.246	1	50.5	1.9e-12	1	60534.5	HUMAN	T-complex protein 1 subunit gamma
[29]	P49368	Oxidation	M	2	-	49	56.3	10.21	2.7e-18	595.644	3	1.8	MMGHRPVLVLSQNTK	Acetyl+Oxidation@1;Oxidation@2	MDA_143_FTMSms2hcd	27.246	1	50.5	1.9e-12	1	60534.5	HUMAN	T-complex protein 1 subunit gamma
[29]	P49368	Oxidation	M	49	63	49	56.3	10.21	2.7e-18	1082.04	2	2.9	MLLDPMGGIVMTNDGNAILR	Oxidation@1=63;Oxidation@11=67	MDA_143_FTMSms2hcd	44.474	1	72	1e-15	1	60534.5	HUMAN	T-complex protein 1 subunit gamma
[29]	P49368	Oxidation	M	54	29	49	56.3	10.21	2.7e-18	1082.04	2	3.4	MLLDPMGGIVMTNDGNAILR	Oxidation@6=29;Oxidation@11=82	MDA_143_FTMSms2hcd	42.02	1	56.2	1.4e-10	1	60534.5	HUMAN	T-complex protein 1 subunit gamma
[29]	P49368	Oxidation	M	59	82	49	56.3	10.21	2.7e-18	1082.04	2	3.4	MLLDPMGGIVMTNDGNAILR	Oxidation@6=29;Oxidation@11=82	MDA_143_FTMSms2hcd	42.02	1	56.2	1.4e-10	1	60534.5	HUMAN	T-complex protein 1 subunit gamma
[29]	P49368	Oxidation	M	80	-	49	56.3	10.21	2.7e-18	426.218	2	0.23	SMIEISR	Oxidation@2	MDA_143_FTMSms2hcd	21.088	1	31.9	5.3e-06	1	60534.5	HUMAN	T-complex protein 1 subunit gamma
[29]	P49368	Oxidation	M	133	-	49	56.3	10.21	2.7e-18	460.259	3	1	KALDDMISTLKK	Oxidation@6	MDA_143_FTMSms2hcd	22.772	1	31.6	1.8e-08	1	60534.5	HUMAN	T-complex protein 1 subunit gamma
[29]	P49368	Oxidation	M	151	-	49	56.3	10.21	2.7e-18	923.143	3	1.4	KISIPVDISDSDMMLNIINSSITTK	Oxidation@13;Oxidation@14	MDA_143_FTMSms2hcd	43.89	1	48.7	1.6e-13	1	60534.5	HUMAN	T-complex protein 1 subunit gamma
[29]	P49368	Oxidation	M	152	-	49	56.3	10.21	2.7e-18	923.143	3	1.4	KISIPVDISDSDMMLNIINSSITTK	Oxidation@13;Oxidation@14	MDA_143_FTMSms2hcd	43.89	1	48.7	1.6e-13	1	60534.5	HUMAN	T-complex protein 1 subunit gamma
[29]	P49368	Oxidation	M	182	-	49	56.3	10.21	2.7e-18	563.254	2	0.7	MVQFEENGR	Oxidation@1	MDA_143_FTMSms2hcd	21.013	1	31.8	3.4e-08	1	60534.5	HUMAN	T-complex protein 1 subunit gamma
[29]	P49368	Oxidation	M	219	-	49	56.3	10.21	2.7e-18	339.186	2	-0.22	GVMINK	Oxidation@3	MDA_143_FTMSms2hcd	15.883	1	20.9	9.2e-06	1	60534.5	HUMAN	T-complex protein 1 subunit gamma
[29]	P49368	Oxidation	M	305	-	49	56.3	10.21	2.7e-18	710.357	2	0.71	GISDLAQHYLMR	Oxidation@11	MDA_143_FTMSms2hcd	35.341	1	64	1.7e-10	1	60534.5	HUMAN	T-complex protein 1 subunit gamma
[29]	P49368	Oxidation	M	416	-	49	56.3	10.21	2.7e-18	878.459	3	1.1	NVLLDPQLVPGGGASEMAVAHALTEK	Oxidation@17	MDA_143_FTMSms2hcd	44.014	1	62.5	1.4e-12	1	60534.5	HUMAN	T-complex protein 1 subunit gamma
[29]	P49368	Oxidation	M	429	-	49	56.3	10.21	2.7e-18	523.59	3	0.87	SKAMTGVEQWPYR	Oxidation@4	MDA_143_FTMSms2hcd	26.319	1	15.4	0.0075	1	60534.5	HUMAN	T-complex protein 1 subunit gamma
[30]	Q8N1F7	Oxidation	M	124	-	50	53.4	8.94	6.1e-16	628.773	2	1	TFGMAEEYHR	Oxidation@4	MDA_143_FTMSms2hcd	19.841	1	42.2	3.1e-12	1	93489.1	HUMAN	Nuclear pore complex protein Nup93
[30]	Q8N1F7	Oxidation	M	133	-	50	53.4	8.94	6.1e-16	697.338	2	1.2	ESMLVEWEQVK	Oxidation@3	MDA_143_FTMSms2hcd	33.31	1	35.3	4.2e-08	1	93489.1	HUMAN	Nuclear pore complex protein Nup93
[30]	Q8N1F7	Oxidation	M	183	-	50	53.4	8.94	6.1e-16	693.322	2	0.84	SSLDNIEMAYAR	Oxidation@8	MDA_143_FTMSms2hcd	30.809	1	49.4	7.5e-13	1	93489.1	HUMAN	Nuclear pore complex protein Nup93
[30]	Q8N1F7	Oxidation	M	230	-	50	53.4	8.94	6.1e-16	816.931	2	2.6	QMTDVLLTPATDALK	Oxidation@2	MDA_143_FTMSms2hcd	37.844	1	47	8.9e-11	1	93489.1	HUMAN	Nuclear pore complex protein Nup93
[30]	Q8N1F7	Oxidation	M	252	-	50	53.4	8.94	6.1e-16	349.171	2	0.5	MEFVR	Oxidation@1	MDA_143_FTMSms2hcd	18.607	1	21	0.0017	1	93489.1	HUMAN	Nuclear pore complex protein Nup93
[30]	Q8N1F7	Oxidation	M	356	-	50	53.4	8.94	6.1e-16	675.296	2	1.4	TWFQEYMNSK	Oxidation@7	MDA_143_FTMSms2hcd	31.274	1	36	1.4e-09	1	93489.1	HUMAN	Nuclear pore complex protein Nup93
[30]	Q8N1F7	Oxidation	M	565	-	50	53.4	8.94	6.1e-16	792.852	2	0.8	DEKDSQGENMFLR	Oxidation@10	MDA_143_FTMSms2hcd	23.517	1	43.3	6.5e-12	1	93489.1	HUMAN	Nuclear pore complex protein Nup93
[30]	Q8N1F7	Oxidation	M	582	-	50	53.4	8.94	6.1e-16	484.742	2	0.6	EFDMILGK	Oxidation@4	MDA_143_FTMSms2hcd	30.746	1	27.6	1.6e-06	1	93489.1	HUMAN	Nuclear pore complex protein Nup93
[30]	Q8N1F7	Oxidation	M	642	-	50	53.4	8.94	6.1e-16	431.739	2	0.99	VLELMNK	Oxidation@5	MDA_143_FTMSms2hcd	22.705	1	27.3	5.7e-05	1	93489.1	HUMAN	Nuclear pore complex protein Nup93
[30]	Q8N1F7	Oxidation	M	666	-	50	53.4	8.94	6.1e-16	631.351	2	1.3	LKNMALSIAER	Oxidation@4	MDA_143_FTMSms2hcd	24.456	1	30.4	1.2e-06	1	93489.1	HUMAN	Nuclear pore complex protein Nup93
[30]	Q8N1F7	Oxidation	M	753	-	50	53.4	8.94	6.1e-16	745.734	3	1.9	HNLSEVLLATMNILFTQFK	Oxidation@11	MDA_143_FTMSms2hcd	55.72	1	48.5	4.8e-14	1	93489.1	HUMAN	Nuclear pore complex protein Nup93
[30]	Q8N1F7	Oxidation	M	798	-	50	53.4	8.94	6.1e-16	699.878	2	2.7	TLITFAGMIPYR	Oxidation@8	MDA_143_FTMSms2hcd	41.978	1	45.8	3.5e-10	1	93489.1	HUMAN	Nuclear pore complex protein Nup93
[30]	Q8N1F7	Oxidation	M	814	-	50	53.4	8.94	6.1e-16	554.773	2	0.75	LVQMEVLMN	Oxidation@4;Oxidation@8	MDA_143_FTMSms2hcd	27.312	1	31.7	1.3e-06	1	93489.1	HUMAN	Nuclear pore complex protein Nup93
[30]	Q8N1F7	Oxidation	M	818	-	50	53.4	8.94	6.1e-16	554.773	2	0.75	LVQMEVLMN	Oxidation@4;Oxidation@8	MDA_143_FTMSms2hcd	27.312	1	31.7	1.3e-06	1	93489.1	HUMAN	Nuclear pore complex protein Nup93
[31]	Q01813	Oxidation	M	39	-	42	39.7	8.81	1.1e-15	902.456	2	1.7	AIGVLTSGGDAQGMNAAVR	Oxidation@14	MDA_143_FTMSms2hcd	29.165	1	68.7	1.1e-15	2	85596.9	HUMAN	ATP-dependent 6-phosphofructokinase, platelet type
[31]	Q01813	Oxidation	M	49	-	42	39.7	8.81	1.1e-15	427.726	2	0.32	MGIYVGAK	Oxidation@1	MDA_143_FTMSms2hcd	22.221	1	30.6	6.3e-07	2	85596.9	HUMAN	ATP-dependent 6-phosphofructokinase, platelet type
[31]	Q01813	Oxidation	M	202	-	42	39.7	8.81	1.1e-15	643.337	3	2.4	IIEVVDAIMTTAQSHQR	Oxidation@9	MDA_143_FTMSms2hcd	36.214	1	69.9	1.5e-13	1	85596.9	HUMAN	ATP-dependent 6-phosphofructokinase, platelet type
[31]	Q01813	Oxidation	M	217	-	42	39.7	8.81	1.1e-15	534.282	2	0.31	TFVLEVMGR	Oxidation@7	MDA_143_FTMSms2hcd	32.952	1	39.2	6.7e-11	3	85596.9	HUMAN	ATP-dependent 6-phosphofructokinase, platelet type
[31]	Q01813	Oxidation	M	443	-	42	39.7	8.81	1.1e-15	732.349	2	2.2	MLAIYDGFDGFAK	Oxidation@1	MDA_143_FTMSms2hcd	41.87	1	46.4	2.9e-12	1	85596.9	HUMAN	ATP-dependent 6-phosphofructokinase, platelet type
[31]	Q01813	Oxidation	M	495	-	42	39.7	8.81	1.1e-15	635.311	2	0.91	YLEEIATQMR	Oxidation@9	MDA_143_FTMSms2hcd	26.608	1	48.1	6.6e-11	1	85596.9	HUMAN	ATP-dependent 6-phosphofructokinase, platelet type
[31]	Q01813	Oxidation	M	672	-	42	39.7	8.81	1.1e-15	652.325	3	2.5	KNVLGHMQQGGAPSPFDR	Oxidation@7	MDA_143_FTMSms2hcd	23.988	1	71.1	2.2e-13	1	85596.9	HUMAN	ATP-dependent 6-phosphofructokinase, platelet type
[31]	Q01813	Oxidation	M	694	-	42	39.7	8.81	1.1e-15	483.242	2	1.1	AMEWITAK	Oxidation@2	MDA_143_FTMSms2hcd	25.576	1	32.6	1.5e-07	1	85596.9	HUMAN	ATP-dependent 6-phosphofructokinase, platelet type
[31]	Q01813	Oxidation	M	758	-	42	39.7	8.81	1.1e-15	387.239	2	0.67	LRPLMK	Oxidation@5	MDA_143_FTMSms2hcd	16.276	1	18.4	8.8e-05	1	85596.9	HUMAN	ATP-dependent 6-phosphofructokinase, platelet type
[31-1]	P17858	Met-loss+Acetyl	M	1	-	36	41.9	8.81	1.1e-15	394.213	2	-0.36	MAAVDLEK	Met-loss+Acetyl@1	MDA_143_FTMSms2hcd	27.471	1	25	0.0018	1	85019.2	HUMAN	ATP-dependent 6-phosphofructokinase, liver type
[31-1]	P17858	Oxidation	M	30	-	36	41.9	8.81	1.1e-15	902.456	2	1.7	AIGVLTSGGDAQGMNAAVR	Oxidation@14	MDA_143_FTMSms2hcd	29.165	1	68.7	1.1e-15	2	85019.2	HUMAN	ATP-dependent 6-phosphofructokinase, liver type
[31-1]	P17858	Oxidation	M	40	-	36	41.9	8.81	1.1e-15	427.726	2	0.32	MGIYVGAK	Oxidation@1	MDA_143_FTMSms2hcd	22.221	1	30.6	6.3e-07	2	85019.2	HUMAN	ATP-dependent 6-phosphofructokinase, liver type
[31-1]	P17858	Oxidation	M	186	-	36	41.9	8.81	1.1e-15	643.996	3	1.4	IMEVIDAITTTAQSHQR	Oxidation@2	MDA_143_FTMSms2hcd	33.725	2	66.7	1.5e-12	1	85019.2	HUMAN	ATP-dependent 6-phosphofructokinase, liver type
[31-1]	P17858	Oxidation	M	208	-	36	41.9	8.81	1.1e-15	534.282	2	0.31	TFVLEVMGR	Oxidation@7	MDA_143_FTMSms2hcd	32.952	1	39.2	6.7e-11	3	85019.2	HUMAN	ATP-dependent 6-phosphofructokinase, liver type
[31-1]	P17858	Oxidation	M	362	-	36	41.9	8.81	1.1e-15	571.274	3	-0.5	AMDDKRFDEATQLR	Oxidation@2	MDA_143_FTMSms2hcd	22.978	1	40.2	5.5e-11	1	85019.2	HUMAN	ATP-dependent 6-phosphofructokinase, liver type
[31-1]	P17858	Oxidation	M	414	-	36	41.9	8.81	1.1e-15	720.714	3	1.5	SNFSLAILNVGAPAAGMNAAVR	Oxidation@17	MDA_143_FTMSms2hcd	45.577	1	61.7	1.5e-13	1	85019.2	HUMAN	ATP-dependent 6-phosphofructokinase, liver type
[31-1]	P17858	Oxidation	M	611	-	36	41.9	8.81	1.1e-15	551.763	2	-0.55	VNVEHMTEK	Oxidation@6	MDA_143_FTMSms2hcd	13.856	1	52.5	4.6e-10	1	85019.2	HUMAN	ATP-dependent 6-phosphofructokinase, liver type
[31-1]	P17858	Oxidation	M	683	-	36	41.9	8.81	1.1e-15	497.258	2	1.2	AMLWLSEK	Oxidation@2	MDA_143_FTMSms2hcd	31.084	1	37	6.6e-08	1	85019.2	HUMAN	ATP-dependent 6-phosphofructokinase, liver type
[31-1]	P17858	Oxidation	M	750	-	36	41.9	8.81	1.1e-15	399.203	2	0.61	MLAQYR	Oxidation@1	MDA_143_FTMSms2hcd	17.675	1	20.6	0.00015	1	85019.2	HUMAN	ATP-dependent 6-phosphofructokinase, liver type
[31-1]	P17858	Oxidation	M	758	-	36	41.9	8.81	1.1e-15	593.631	3	1.9	ISMAAYVSGELEHVTR	Oxidation@3	MDA_143_FTMSms2hcd	32.788	1	70.7	8.3e-14	1	85019.2	HUMAN	ATP-dependent 6-phosphofructokinase, liver type
[31-2]	P08237	Oxidation	M	186	-	17	22.8	6.37	3.5e-11	643.996	3	1.2	IMEIVDAITTTAQSHQR	Oxidation@2	MDA_143_FTMSms2hcd	33.866	1	51.6	3.5e-11	1	85183.3	HUMAN	ATP-dependent 6-phosphofructokinase, muscle type
[31-2]	P08237	Oxidation	M	208	-	17	22.8	6.37	3.5e-11	534.282	2	0.31	TFVLEVMGR	Oxidation@7	MDA_143_FTMSms2hcd	32.952	1	39.2	6.7e-11	3	85183.3	HUMAN	ATP-dependent 6-phosphofructokinase, muscle type
[31-2]	P08237	Oxidation	M	662	-	17	22.8	6.37	3.5e-11	619.63	3	1.9	NVLGHMQQGGSPTPFDR	Oxidation@6	MDA_143_FTMSms2hcd	25.957	1	35.3	4.8e-09	1	85183.3	HUMAN	ATP-dependent 6-phosphofructokinase, muscle type
[32]	P35606	Gln->pyro-Glu	Q	632	-	43	47	7.88	5.5e-14	732.859	2	1.5	QQALTVSTDPEHR	Gln->pyro-Glu@1	MDA_143_FTMSms2hcd	26.501	1	39	1.3e-10	1	102488	HUMAN	Coatomer subunit beta'
[32]	P35606	Gln->pyro-Glu	Q	672	-	43	47	7.88	5.5e-14	478.277	2	0.89	QLAELAISK	Gln->pyro-Glu@1	MDA_143_FTMSms2hcd	39.921	1	33	8.6e-08	1	102488	HUMAN	Coatomer subunit beta'
[32]	P35606	Oxidation	M	79	-	43	47	7.88	5.5e-14	824.91	2	0.82	KNWVVTGADDMQIR	Oxidation@11	MDA_143_FTMSms2hcd	27.39	1	52.8	6.4e-14	1	102488	HUMAN	Coatomer subunit beta'
[32]	P35606	Oxidation	M	94	-	43	47	7.88	5.5e-14	507.571	3	1.4	VHMFEAHSDYIR	Oxidation@3	MDA_143_FTMSms2hcd	22.656	1	43.5	2.9e-10	1	102488	HUMAN	Coatomer subunit beta'
[32]	P35606	Oxidation	M	271	-	43	47	7.88	5.5e-14	664.812	2	1.1	LESTLNYGMER	Oxidation@9	MDA_143_FTMSms2hcd	24.852	1	51	6e-12	1	102488	HUMAN	Coatomer subunit beta'
[32]	P35606	Oxidation	M	306	-	43	47	7.88	5.5e-14	546.58	3	0.35	LGREEPAMSMDANGK	Oxidation@8;Oxidation@10	MDA_143_FTMSms2hcd	15.09	1	33.4	2.9e-07	1	102488	HUMAN	Coatomer subunit beta'
[32]	P35606	Oxidation	M	308	-	43	47	7.88	5.5e-14	546.58	3	0.35	LGREEPAMSMDANGK	Oxidation@8;Oxidation@10	MDA_143_FTMSms2hcd	15.09	1	33.4	2.9e-07	1	102488	HUMAN	Coatomer subunit beta'
[32]	P35606	Oxidation	M	330	-	43	47	7.88	5.5e-14	654.298	2	0.09	AMGDAEIKDGER	Oxidation@2	MDA_143_FTMSms2hcd	15.19	1	54.2	4.6e-13	1	102488	HUMAN	Coatomer subunit beta'
[32]	P35606	Oxidation	M	561	-	43	47	7.88	5.5e-14	607.829	2	1.9	TMYLLGYIPK	Oxidation@2	MDA_143_FTMSms2hcd	40.239	1	33	1.3e-08	1	102488	HUMAN	Coatomer subunit beta'
[32]	P35606	Oxidation	M	730	-	43	47	7.88	5.5e-14	767.874	2	3.5	NNVAFMSYFLQGK	Oxidation@6	MDA_143_FTMSms2hcd	38.899	1	46.9	4.2e-10	1	102488	HUMAN	Coatomer subunit beta'
[32]	P35606	Oxidation	M	836	-	43	47	7.88	5.5e-14	776.858	2	2	NVMEEGKDFQPSR	Oxidation@3	MDA_143_FTMSms2hcd	20.184	1	58.4	2e-10	1	102488	HUMAN	Coatomer subunit beta'
[33]	Q9Y678	Gln->pyro-Glu	Q	146	-	38	45.2	10.29	1.9e-18	787.787	3	3.5	QAIVDKVPSVSSSALVSSLHLLK	Gln->pyro-Glu@1	MDA_143_FTMSms2hcd	48.385	1	47.4	5.6e-11	1	97719.2	HUMAN	Coatomer subunit gamma-1
[33]	Q9Y678	Gln->pyro-Glu	Q	610	-	38	45.2	10.29	1.9e-18	894.455	2	3.7	QEIFQEQLAAVPEFR	Gln->pyro-Glu@1	MDA_143_FTMSms2hcd	49.097	1	49.7	4e-10	1	97719.2	HUMAN	Coatomer subunit gamma-1
[33]	Q9Y678	Oxidation	M	73	-	38	45.2	10.29	1.9e-18	938.807	3	1.3	ILYLINQGEHLGTTEATEAFFAMTK	Oxidation@23	MDA_143_FTMSms2hcd	45.885	1	74.8	1.9e-18	1	97719.2	HUMAN	Coatomer subunit gamma-1
[33]	Q9Y678	Oxidation	M	113	-	38	45.2	10.29	1.9e-18	415.512	3	-1	DMTGKEDNYR	Oxidation@2	MDA_143_FTMSms2hcd	12.426	1	34	2e-13	1	97719.2	HUMAN	Coatomer subunit gamma-1
[33]	Q9Y678	Oxidation	M	191	-	38	45.2	10.29	1.9e-18	808.399	4	2.3	WVNEAQEAASSDNIMVQYHALGLLYHVR	Oxidation@15	MDA_143_FTMSms2hcd	42.809	1	71.2	2e-15	1	97719.2	HUMAN	Coatomer subunit gamma-1
[33]	Q9Y678	Oxidation	M	368	-	38	45.2	10.29	1.9e-18	832.381	2	1.5	QISSFMSEISDEFK	Oxidation@6	MDA_143_FTMSms2hcd	37.937	1	46.9	2.2e-13	1	97719.2	HUMAN	Coatomer subunit gamma-1
[33]	Q9Y678	Oxidation	M	398	-	38	45.2	10.29	1.9e-18	584.982	3	2.2	KHAVLMNFLFTMLR	Oxidation@6;Oxidation@12	MDA_143_FTMSms2hcd	39.692	1	45.6	1.2e-09	1	97719.2	HUMAN	Coatomer subunit gamma-1
[33]	Q9Y678	Oxidation	M	404	-	38	45.2	10.29	1.9e-18	584.982	3	2.2	KHAVLMNFLFTMLR	Oxidation@6;Oxidation@12	MDA_143_FTMSms2hcd	39.692	1	45.6	1.2e-09	1	97719.2	HUMAN	Coatomer subunit gamma-1
[33]	Q9Y678	Oxidation	M	505	-	38	45.2	10.29	1.9e-18	640.018	3	1.8	FGAQNEEMLPSILVLLK	Oxidation@8	MDA_143_FTMSms2hcd	53.187	1	42.4	1.2e-15	1	97719.2	HUMAN	Coatomer subunit gamma-1
[33]	Q9Y678	Oxidation	M	586	-	38	45.2	10.29	1.9e-18	693.857	2	0.97	SVPLATAPMAEQR	Oxidation@9	MDA_143_FTMSms2hcd	25.868	1	53.3	5.2e-10	1	97719.2	HUMAN	Coatomer subunit gamma-1
[33]	Q9Y678	Oxidation	M	854	-	38	45.2	10.29	1.9e-18	795.452	2	2.5	LLLLDTVTMQVTAR	Oxidation@9	MDA_143_FTMSms2hcd	44.541	1	61.3	1e-11	1	97719.2	HUMAN	Coatomer subunit gamma-1
[33-1]	Q9UBF2	Gln->pyro-Glu	Q	363	-	28	38.6	9.86	1.2e-17	799.884	2	1.6	QISSFVSEISDEFK	Gln->pyro-Glu@1	MDA_143_FTMSms2hcd	55.237	1	37.8	2e-10	1	97623.2	HUMAN	Coatomer subunit gamma-2
[33-1]	Q9UBF2	Oxidation	M	73	-	28	38.6	9.86	1.2e-17	959.471	3	2.4	ILYLLNQGEHFGTTEATEAFFAMTR	Oxidation@23	MDA_143_FTMSms2hcd	47.189	1	63.9	1.2e-17	1	97623.2	HUMAN	Coatomer subunit gamma-2
[33-1]	Q9UBF2	Oxidation	M	95	-	28	38.6	9.86	1.2e-17	977.01	2	1.6	EMATISEDVIIVTSSLTK	Oxidation@2	MDA_143_FTMSms2hcd	50.072	1	49.7	4e-14	1	97623.2	HUMAN	Coatomer subunit gamma-2
[33-1]	Q9UBF2	Oxidation	M	113	-	28	38.6	9.86	1.2e-17	410.52	3	-0.51	DMTGKEDVYR	Oxidation@2	MDA_143_FTMSms2hcd	16.037	1	40.4	1.3e-09	1	97623.2	HUMAN	Coatomer subunit gamma-2
[33-1]	Q9UBF2	Oxidation	M	136	-	28	38.6	9.86	1.2e-17	682.349	2	0.98	ITDGTMLQAIER	Oxidation@6	MDA_143_FTMSms2hcd	28.247	1	49.4	3.7e-08	1	97623.2	HUMAN	Coatomer subunit gamma-2
[33-1]	Q9UBF2	Oxidation	M	166	-	28	38.6	9.86	1.2e-17	594.631	3	1.4	VSSVSSSALVSSLHMMK	Oxidation@15;Oxidation@16	MDA_143_FTMSms2hcd	30.338	1	52	1.7e-11	1	97623.2	HUMAN	Coatomer subunit gamma-2
[33-1]	Q9UBF2	Oxidation	M	167	-	28	38.6	9.86	1.2e-17	594.631	3	1.4	VSSVSSSALVSSLHMMK	Oxidation@15;Oxidation@16	MDA_143_FTMSms2hcd	30.338	1	52	1.7e-11	1	97623.2	HUMAN	Coatomer subunit gamma-2
[33-1]	Q9UBF2	Oxidation	M	576	-	28	38.6	9.86	1.2e-17	513.255	4	1.3	ALHQYTLEPSEKPFDMK	Oxidation@16	MDA_143_FTMSms2hcd	28.481	1	38	3.1e-08	1	97623.2	HUMAN	Coatomer subunit gamma-2
[33-1]	Q9UBF2	Oxidation	M	583	-	28	38.6	9.86	1.2e-17	723.888	2	1.1	SIPLAMAPVFEQK	Oxidation@6	MDA_143_FTMSms2hcd	38.12	1	38.4	5.4e-08	1	97623.2	HUMAN	Coatomer subunit gamma-2
[33-1]	Q9UBF2	Oxidation	M	851	-	28	38.6	9.86	1.2e-17	745.407	2	1.4	LALADGVTMQVTVR	Oxidation@9	MDA_143_FTMSms2hcd	34.181	1	51.4	2.6e-11	1	97623.2	HUMAN	Coatomer subunit gamma-2
[34]	Q14247	Gln->pyro-Glu	Q	280	-	41	56	9.28	1.4e-16	592.268	2	1.6	QDSAAVGFDYK	Gln->pyro-Glu@1	MDA_143_FTMSms2hcd	31.962	1	28.4	1e-09	1	61586.6	HUMAN	Src substrate cortactin
[34]	Q14247	Gln->pyro-Glu	Q	382	-	41	56	9.28	1.4e-16	514.741	2	-0.62	QEQEEARR	Gln->pyro-Glu@1	MDA_143_FTMSms2hcd	13.302	1	22.4	3.7e-05	1	61586.6	HUMAN	Src substrate cortactin
[34]	Q14247	Oxidation	M	95	-	41	56	9.28	1.4e-16	414.193	3	0.47	FGVEQDRMDK	Oxidation@8	MDA_143_FTMSms2hcd	17.5	1	40.8	6.2e-10	1	61586.6	HUMAN	Src substrate cortactin
[34]	Q14247	Oxidation	M	129	-	41	56	9.28	1.4e-16	434.703	2	1.1	FGVQMDR	Oxidation@5	MDA_143_FTMSms2hcd	19.271	2	33	8.1e-09	1	61586.6	HUMAN	Src substrate cortactin
[34]	Q14247	Oxidation	M	448	-	41	56	9.28	1.4e-16	1085.99	2	1.8	GPVSGTEPEPVYSMEAADYR	Oxidation@14	MDA_143_FTMSms2hcd	30.046	1	66.6	1.4e-16	1	61586.6	HUMAN	Src substrate cortactin
[34]	Q14247	Phospho	T	401	7	41	56	9.28	1.4e-16	907.921	2	1.2	TQTPPVSPAPQPTEER	Phospho@3=7	MDA_143_FTMSms2hcd	25.18	1	50.5	2.3e-10	1	61586.6	HUMAN	Src substrate cortactin
[34]	Q14247	Phospho	S	405	19	41	56	9.28	1.4e-16	698.649	3	0.96	AKTQTPPVSPAPQPTEER	Phospho@9=19;Phospho@3|5	MDA_143_FTMSms2hcd	22.946	1	47.1	7.6e-11	1	61586.6	HUMAN	Src substrate cortactin
[34]	Q14247	Phospho	S	418	7	41	56	9.28	1.4e-16	795.86	2	2	LPSSPVYEDAASFK	Phospho@4=7	MDA_143_FTMSms2hcd	35.371	1	53.6	1.5e-14	1	61586.6	HUMAN	Src substrate cortactin
[35]	Q13619	Gln->pyro-Glu	Q	293	-	46	51.6	7.42	4e-13	723.92	2	0.99	QLLGEHLTAILQK	Gln->pyro-Glu@1	MDA_143_FTMSms2hcd	45.519	1	54.2	9.7e-10	2	87681	HUMAN	Cullin-4A
[35]	Q13619	Gln->pyro-Glu	Q	693	-	46	51.6	7.42	4e-13	580.309	2	0.28	QYQIDAAIVR	Gln->pyro-Glu@1	MDA_143_FTMSms2hcd	38.694	1	33.5	7.3e-08	2	87681	HUMAN	Cullin-4A
[35]	Q13619	Oxidation	M	101	-	46	51.6	7.42	4e-13	427.228	2	0.85	VSPMLYK	Oxidation@4	MDA_143_FTMSms2hcd	22.866	1	33.6	2.4e-06	1	87681	HUMAN	Cullin-4A
[35]	Q13619	Oxidation	M	146	-	46	51.6	7.42	4e-13	412.212	2	0.082	QMIMIR	Oxidation@2;Oxidation@4	MDA_143_FTMSms2hcd	21.286	1	19.1	2.9e-06	2	87681	HUMAN	Cullin-4A
[35]	Q13619	Oxidation	M	148	-	46	51.6	7.42	4e-13	412.212	2	0.082	QMIMIR	Oxidation@2;Oxidation@4	MDA_143_FTMSms2hcd	21.286	1	19.1	2.9e-06	2	87681	HUMAN	Cullin-4A
[35]	Q13619	Oxidation	M	173	-	46	51.6	7.42	4e-13	1250.13	2	1.4	TYVLQNSTLPSIWDMGLELFR	Oxidation@15	MDA_143_FTMSms2hcd	56.006	1	39.9	2.1e-12	1	87681	HUMAN	Cullin-4A
[35]	Q13619	Oxidation	M	220	-	46	51.6	7.42	4e-13	741.899	2	1.9	SLLGMLSDLQVYK	Oxidation@5	MDA_143_FTMSms2hcd	45.365	1	44.6	2.6e-12	1	87681	HUMAN	Cullin-4A
[35]	Q13619	Oxidation	M	322	-	46	51.6	7.42	4e-13	916.128	3	2.9	GLDHLLDENRVPDLAQMYQLFSR	Oxidation@17	MDA_143_FTMSms2hcd	44.002	1	34.6	1e-09	1	87681	HUMAN	Cullin-4A
[35]	Q13619	Oxidation	M	361	-	46	51.6	7.42	4e-13	749.89	4	3.1	TFGTAIVINPEKDKDMVQDLLDFKDK	Oxidation@16	MDA_143_FTMSms2hcd	42.798	1	46.1	7.6e-12	1	87681	HUMAN	Cullin-4A
[35]	Q13619	Oxidation	M	437	-	46	51.6	7.42	4e-13	404.741	2	0.45	IMILFR	Oxidation@2	MDA_143_FTMSms2hcd	35.79	1	30.1	9.6e-05	2	87681	HUMAN	Cullin-4A
[35]	Q13619	Oxidation	M	494	-	46	51.6	7.42	4e-13	370.686	2	-0.02	LEGMFK	Oxidation@4	MDA_143_FTMSms2hcd	18.962	1	20.7	4.8e-05	2	87681	HUMAN	Cullin-4A
[35]	Q13619	Oxidation	M	498	-	46	51.6	7.42	4e-13	487.232	3	1.1	LEGMFKDMELSK	Oxidation@4;Oxidation@8	MDA_143_FTMSms2hcd	23.297	1	37.3	1.7e-08	2	87681	HUMAN	Cullin-4A
[35]	Q13619	Oxidation	M	505	-	46	51.6	7.42	4e-13	453.232	2	2.2	DIMVHFK	Oxidation@3	MDA_143_FTMSms2hcd	25.443	1	25.4	4.7e-06	1	87681	HUMAN	Cullin-4A
[35]	Q13619	Oxidation	M	615	-	46	51.6	7.42	4e-13	619.29	2	0.51	MATGIEDSELR	Oxidation@1	MDA_143_FTMSms2hcd	24.283	1	32.1	4.3e-08	1	87681	HUMAN	Cullin-4A
[35]	Q13619	Oxidation	M	745	-	46	51.6	7.42	4e-13	571.286	3	0.85	RIESLIDRDYMER	Oxidation@11	MDA_143_FTMSms2hcd	26.313	1	37.3	3.7e-09	2	87681	HUMAN	Cullin-4A
[35-1]	Q13620	Gln->pyro-Glu	Q	447	-	44	43.9	7.12	1.4e-12	723.92	2	0.99	QLLGEHLTAILQK	Gln->pyro-Glu@1	MDA_143_FTMSms2hcd	45.519	1	54.2	9.7e-10	2	103983	HUMAN	Cullin-4B
[35-1]	Q13620	Gln->pyro-Glu	Q	769	-	44	43.9	7.12	1.4e-12	664.334	2	0.64	QATGIEDGELRR	Gln->pyro-Glu@1	MDA_143_FTMSms2hcd	25.941	1	38.1	2.3e-06	1	103983	HUMAN	Cullin-4B
[35-1]	Q13620	Gln->pyro-Glu	Q	847	-	44	43.9	7.12	1.4e-12	580.309	2	0.28	QYQIDAAIVR	Gln->pyro-Glu@1	MDA_143_FTMSms2hcd	38.694	1	33.5	7.3e-08	2	103983	HUMAN	Cullin-4B
[35-1]	Q13620	Oxidation	M	300	-	44	43.9	7.12	1.4e-12	412.212	2	0.082	QMIMIR	Oxidation@2;Oxidation@4	MDA_143_FTMSms2hcd	21.286	1	19.1	2.9e-06	2	103983	HUMAN	Cullin-4B
[35-1]	Q13620	Oxidation	M	302	-	44	43.9	7.12	1.4e-12	412.212	2	0.082	QMIMIR	Oxidation@2;Oxidation@4	MDA_143_FTMSms2hcd	21.286	1	19.1	2.9e-06	2	103983	HUMAN	Cullin-4B
[35-1]	Q13620	Oxidation	M	320	-	44	43.9	7.12	1.4e-12	1273.13	2	1.6	TYVLQNSMLPSIWDMGLELFR	Oxidation@8;Oxidation@15	MDA_143_FTMSms2hcd	55.168	1	35	3.5e-12	1	103983	HUMAN	Cullin-4B
[35-1]	Q13620	Oxidation	M	327	-	44	43.9	7.12	1.4e-12	1273.13	2	1.6	TYVLQNSMLPSIWDMGLELFR	Oxidation@8;Oxidation@15	MDA_143_FTMSms2hcd	55.168	1	35	3.5e-12	1	103983	HUMAN	Cullin-4B
[35-1]	Q13620	Oxidation	M	374	-	44	43.9	7.12	1.4e-12	1145.06	2	0.52	SLLSMLSDLQIYQDSFEQR	Oxidation@5	MDA_143_FTMSms2hcd	50.896	1	66.8	1.4e-12	1	103983	HUMAN	Cullin-4B
[35-1]	Q13620	Oxidation	M	544	-	44	43.9	7.12	1.4e-12	370.194	2	0.54	FINAMK	Oxidation@5	MDA_143_FTMSms2hcd	17.313	1	25.7	4e-05	1	103983	HUMAN	Cullin-4B
[35-1]	Q13620	Oxidation	M	591	-	44	43.9	7.12	1.4e-12	404.741	2	0.45	IMIIFR	Oxidation@2	MDA_143_FTMSms2hcd	35.79	1	30.1	9.6e-05	2	103983	HUMAN	Cullin-4B
[35-1]	Q13620	Oxidation	M	648	-	44	43.9	7.12	1.4e-12	370.686	2	-0.02	LEGMFK	Oxidation@4	MDA_143_FTMSms2hcd	18.962	1	20.7	4.8e-05	2	103983	HUMAN	Cullin-4B
[35-1]	Q13620	Oxidation	M	652	-	44	43.9	7.12	1.4e-12	487.232	3	1.1	LEGMFKDMELSK	Oxidation@4;Oxidation@8	MDA_143_FTMSms2hcd	23.297	1	37.3	1.7e-08	2	103983	HUMAN	Cullin-4B
[35-1]	Q13620	Oxidation	M	659	-	44	43.9	7.12	1.4e-12	455.739	2	0.063	DIMIQFK	Oxidation@3	MDA_143_FTMSms2hcd	32.522	1	21.1	0.00046	1	103983	HUMAN	Cullin-4B
[35-1]	Q13620	Oxidation	M	899	-	44	43.9	7.12	1.4e-12	571.286	3	0.85	RIESLIDRDYMER	Oxidation@11	MDA_143_FTMSms2hcd	26.313	1	37.3	3.7e-09	2	103983	HUMAN	Cullin-4B
[35-1]	Q13620	Phospho	Y	712	6	44	43.9	7.12	1.4e-12	1042.51	2	13	LQEIFKTFYLGKHSGR	Phospho@9=6;Phospho@7|14	MDA_143_FTMSms2hcd	38.924	1	16.2	0.025	1	103983	HUMAN	Cullin-4B
[36]	Q92973	Acetyl	K	14	-	40	41.2	9.73	2e-17	849.767	3	2.5	MEYEWKPDEQGLQQILQLLK	Oxidation@1;Acetyl@6	MDA_143_FTMSms2hcd	57.884	1	38.1	4.8e-09	1	102356	HUMAN	Transportin-1
[36]	Q92973	Gln->pyro-Glu	Q	693	-	40	41.2	9.73	2e-17	631.836	2	2.1	QSSFALLGDLTK	Gln->pyro-Glu@1	MDA_143_FTMSms2hcd	49.309	1	43.1	2.8e-08	2	102356	HUMAN	Transportin-1
[36]	Q92973	Oxidation	M	9	-	40	41.2	9.73	2e-17	849.767	3	2.5	MEYEWKPDEQGLQQILQLLK	Oxidation@1;Acetyl@6	MDA_143_FTMSms2hcd	57.884	1	38.1	4.8e-09	1	102356	HUMAN	Transportin-1
[36]	Q92973	Oxidation	M	249	-	40	41.2	9.73	2e-17	530.315	2	0.043	ALVMLLEVR	Oxidation@4	MDA_143_FTMSms2hcd	40.912	1	41	1e-07	2	102356	HUMAN	Transportin-1
[36]	Q92973	Oxidation	M	262	-	40	41.2	9.73	2e-17	642.664	3	2	LLPHMHNIVEYMLQR	Oxidation@5;Oxidation@12	MDA_143_FTMSms2hcd	29.397	1	50.2	2.3e-11	1	102356	HUMAN	Transportin-1
[36]	Q92973	Oxidation	M	269	-	40	41.2	9.73	2e-17	642.664	3	2	LLPHMHNIVEYMLQR	Oxidation@5;Oxidation@12	MDA_143_FTMSms2hcd	29.397	1	50.2	2.3e-11	1	102356	HUMAN	Transportin-1
[36]	Q92973	Oxidation	M	316	-	40	41.2	9.73	2e-17	550.331	2	0.86	LIPVLVNGMK	Oxidation@9	MDA_143_FTMSms2hcd	34.544	1	44.1	3.1e-07	1	102356	HUMAN	Transportin-1
[36]	Q92973	Oxidation	M	490	-	40	41.2	9.73	2e-17	915.819	3	4	YAHWVVSQPPDTYLKPLMTELLK	Oxidation@18	MDA_143_FTMSms2hcd	44.628	1	56.8	1.1e-12	1	102356	HUMAN	Transportin-1
[36]	Q92973	Oxidation	M	572	-	40	41.2	9.73	2e-17	1023.55	4	2.4	NLLILYDAIGTLADSVGHHLNKPEYIQMLMPPLIQK	Oxidation@28;Oxidation@30	MDA_143_FTMSms2hcd	56.747	1	43.2	3.1e-12	1	102356	HUMAN	Transportin-1
[36]	Q92973	Oxidation	M	574	-	40	41.2	9.73	2e-17	1023.55	4	2.4	NLLILYDAIGTLADSVGHHLNKPEYIQMLMPPLIQK	Oxidation@28;Oxidation@30	MDA_143_FTMSms2hcd	56.747	1	43.2	3.1e-12	1	102356	HUMAN	Transportin-1
[36]	Q92973	Oxidation	M	583	-	40	41.2	9.73	2e-17	354.181	2	0.022	WNMLK	Oxidation@3	MDA_143_FTMSms2hcd	20.37	1	17.5	4.6e-07	1	102356	HUMAN	Transportin-1
[36-1]	O14787	Gln->pyro-Glu	Q	682	-	26	31.9	8.43	5.4e-15	631.836	2	2.1	QSSFALLGDLTK	Gln->pyro-Glu@1	MDA_143_FTMSms2hcd	49.309	1	43.1	2.8e-08	2	101389	HUMAN	Transportin-2
[36-1]	O14787	Oxidation	M	239	-	26	31.9	8.43	5.4e-15	530.315	2	0.043	ALVMLLEVR	Oxidation@4	MDA_143_FTMSms2hcd	40.912	1	41	1e-07	2	101389	HUMAN	Transportin-2
[36-1]	O14787	Oxidation	M	252	-	26	31.9	8.43	5.4e-15	638.004	3	1.5	LIPHMHSIIQYMLQR	Oxidation@5;Oxidation@12	MDA_143_FTMSms2hcd	30.104	1	41.3	9.3e-09	1	101389	HUMAN	Transportin-2
[36-1]	O14787	Oxidation	M	259	-	26	31.9	8.43	5.4e-15	638.004	3	1.5	LIPHMHSIIQYMLQR	Oxidation@5;Oxidation@12	MDA_143_FTMSms2hcd	30.104	1	41.3	9.3e-09	1	101389	HUMAN	Transportin-2
[36-1]	O14787	Oxidation	M	306	-	26	31.9	8.43	5.4e-15	1045.61	2	3.7	EVLASHLVQLIPILVNGMK	Oxidation@18	MDA_143_FTMSms2hcd	52.907	1	38.5	7.7e-11	1	101389	HUMAN	Transportin-2
[36-1]	O14787	Oxidation	M	473	-	26	31.9	8.43	5.4e-15	692.109	4	-1	YAHWVVSQPPDMHLKPLMTELLK	Oxidation@12;Oxidation@18	MDA_143_FTMSms2hcd	37.034	1	32.7	1.9e-07	1	101389	HUMAN	Transportin-2
[36-1]	O14787	Oxidation	M	479	-	26	31.9	8.43	5.4e-15	692.109	4	-1	YAHWVVSQPPDMHLKPLMTELLK	Oxidation@12;Oxidation@18	MDA_143_FTMSms2hcd	37.034	1	32.7	1.9e-07	1	101389	HUMAN	Transportin-2
[36-1]	O14787	Oxidation	M	859	-	26	31.9	8.43	5.4e-15	609.777	2	1.1	DDLRDMFYK	Oxidation@6	MDA_143_FTMSms2hcd	26.274	1	30.7	2e-07	1	101389	HUMAN	Transportin-2
[37]	P41250	Oxidation	M	202	-	43	49.3	9.12	2.8e-16	533.262	3	1.8	TSGHVDKFADFMVK	Oxidation@12	MDA_143_FTMSms2hcd	27.297	1	37.7	5.1e-11	1	83166.3	HUMAN	Glycine--tRNA ligase
[37]	P41250	Oxidation	M	281	-	43	49.3	9.12	2.8e-16	1040.53	2	2.3	SPITGNDLSPPVSFNLMFK	Oxidation@17	MDA_143_FTMSms2hcd	46.151	1	63.4	2.8e-14	1	83166.3	HUMAN	Glycine--tRNA ligase
[37]	P41250	Oxidation	M	292	-	43	49.3	9.12	2.8e-16	947.819	3	0.92	TFIGPGGNMPGYLRPETAQGIFLNFK	Oxidation@9	MDA_143_FTMSms2hcd	45.937	1	77.8	2.8e-16	1	83166.3	HUMAN	Glycine--tRNA ligase
[37]	P41250	Oxidation	M	348	-	43	49.3	9.12	2.8e-16	801.372	3	2.4	EFTMAEIEHFVDPSEKDHPK	Oxidation@4	MDA_143_FTMSms2hcd	33.96	1	52	6.9e-11	1	83166.3	HUMAN	Glycine--tRNA ligase
[37]	P41250	Oxidation	M	555	-	43	49.3	9.12	2.8e-16	368.189	2	0.23	DMINVK	Oxidation@2	MDA_143_FTMSms2hcd	17.062	1	18.4	4.4e-05	1	83166.3	HUMAN	Glycine--tRNA ligase
[37]	P41250	Oxidation	M	585	-	43	49.3	9.12	2.8e-16	565.949	3	1.3	IMYTVFEHTFHVR	Oxidation@2	MDA_143_FTMSms2hcd	35.197	1	59.1	3.7e-10	1	83166.3	HUMAN	Glycine--tRNA ligase
[38]	P02786	Gln->pyro-Glu	Q	28	-	42	52.4	10.59	5.2e-19	679.289	2	1.1	QVDGDNSHVEMK	Gln->pyro-Glu@1;Oxidation@11	MDA_143_FTMSms2hcd	17.421	1	54.6	5.2e-19	1	84872.1	HUMAN	Transferrin receptor protein 1
[38]	P02786	Oxidation	M	38	-	42	52.4	10.59	5.2e-19	679.289	2	1.1	QVDGDNSHVEMK	Gln->pyro-Glu@1;Oxidation@11	MDA_143_FTMSms2hcd	17.421	1	54.6	5.2e-19	1	84872.1	HUMAN	Transferrin receptor protein 1
[38]	P02786	Oxidation	M	283	-	42	52.4	10.59	5.2e-19	1083.56	2	2.8	VANAESLNAIGVLIYMDQTK	Oxidation@16	MDA_143_FTMSms2hcd	46.422	1	68	1e-16	1	84872.1	HUMAN	Transferrin receptor protein 1
[38]	P02786	Oxidation	M	432	-	42	52.4	10.59	5.2e-19	657.826	2	1.8	LAQMFSDMVLK	Oxidation@4;Oxidation@8	MDA_143_FTMSms2hcd	31.167	1	37	1.3e-10	1	84872.1	HUMAN	Transferrin receptor protein 1
[38]	P02786	Oxidation	M	436	-	42	52.4	10.59	5.2e-19	657.826	2	1.8	LAQMFSDMVLK	Oxidation@4;Oxidation@8	MDA_143_FTMSms2hcd	31.167	1	37	1.3e-10	1	84872.1	HUMAN	Transferrin receptor protein 1
[38]	P02786	Oxidation	M	635	-	42	52.4	10.59	5.2e-19	666.345	3	2.3	ADIKEMGLSLQWLYSAR	Oxidation@6	MDA_143_FTMSms2hcd	43.339	1	46.1	2.2e-08	1	84872.1	HUMAN	Transferrin receptor protein 1
[38]	P02786	Oxidation	M	679	-	42	52.4	10.59	5.2e-19	666.818	4	-6.1	VMRVEYHFLSPYVSPKESPFR	Oxidation@2;Phospho@10|14|18	MDA_143_FTMSms2hcd	35.993	1	16.3	0.019	1	84872.1	HUMAN	Transferrin receptor protein 1
[39]	P38606	Gln->pyro-Glu	Q	213	-	39	59.2	10.41	1.2e-18	470.267	2	1.2	QVRPVTEK	Gln->pyro-Glu@1	MDA_143_FTMSms2hcd	19.062	1	26.1	0.00065	1	68304.7	HUMAN	V-type proton ATPase catalytic subunit A
[39]	P38606	Oxidation	M	61	-	39	59.2	10.41	1.2e-18	894.439	3	2.3	LEGDMATIQVYEETSGVSVGDPVLR	Oxidation@5	MDA_143_FTMSms2hcd	41.83	1	50.8	1.7e-13	1	68304.7	HUMAN	V-type proton ATPase catalytic subunit A
[39]	P38606	Oxidation	M	95	-	39	59.2	10.41	1.2e-18	1040.31	4	2.2	TGKPLSVELGPGIMGAIFDGIQRPLSDISSQTQSIYIPR	Oxidation@14	MDA_143_FTMSms2hcd	50.244	1	74.7	1.2e-18	1	68304.7	HUMAN	V-type proton ATPase catalytic subunit A
[39]	P38606	Oxidation	M	167	-	39	59.2	10.41	1.2e-18	371.718	2	0.43	IMLPPR	Oxidation@2	MDA_143_FTMSms2hcd	25.357	1	17.7	7.8e-05	1	68304.7	HUMAN	V-type proton ATPase catalytic subunit A
[39]	P38606	Oxidation	M	205	-	39	59.2	10.41	1.2e-18	639.838	2	1.9	FTMVQVWPVR	Oxidation@3	MDA_143_FTMSms2hcd	37.919	1	35.6	1e-11	1	68304.7	HUMAN	V-type proton ATPase catalytic subunit A
[39]	P38606	Oxidation	M	284	-	39	59.2	10.41	1.2e-18	525.749	2	1.4	GNEMSEVLR	Oxidation@4	MDA_143_FTMSms2hcd	19.611	1	35.5	2.8e-08	1	68304.7	HUMAN	V-type proton ATPase catalytic subunit A
[39]	P38606	Oxidation	M	296	-	39	59.2	10.41	1.2e-18	698.82	2	1.5	DFPELTMEVDGK	Oxidation@7	MDA_143_FTMSms2hcd	34.85	1	37	6.1e-08	1	68304.7	HUMAN	V-type proton ATPase catalytic subunit A
[39]	P38606	Oxidation	M	306	-	39	59.2	10.41	1.2e-18	700.668	3	1.3	DFPELTMEVDGKVESIMK	Oxidation@7;Oxidation@17	MDA_143_FTMSms2hcd	38.902	1	48	2.1e-11	1	68304.7	HUMAN	V-type proton ATPase catalytic subunit A
[39]	P38606	Oxidation	M	318	-	39	59.2	10.41	1.2e-18	766.399	2	0.67	TALVANTSNMPVAAR	Oxidation@10	MDA_143_FTMSms2hcd	24.811	1	55.1	2.5e-11	1	68304.7	HUMAN	V-type proton ATPase catalytic subunit A
[39]	P38606	Oxidation	M	368	-	39	59.2	10.41	1.2e-18	899.427	2	-0.049	LAEMPADSGYPAYLGAR	Oxidation@4	MDA_143_FTMSms2hcd	32.213	1	51.2	7.6e-11	1	68304.7	HUMAN	V-type proton ATPase catalytic subunit A
[39]	P38606	Oxidation	M	574	-	39	59.2	10.41	1.2e-18	561.269	2	0.85	EHMGDILYK	Oxidation@3	MDA_143_FTMSms2hcd	20.962	1	27.1	4.5e-06	1	68304.7	HUMAN	V-type proton ATPase catalytic subunit A
[39]	P38606	Oxidation	M	608	-	39	59.2	10.41	1.2e-18	908.913	2	1.4	SDYAQLLEDMQNAFR	Oxidation@10	MDA_143_FTMSms2hcd	39.205	1	60.8	2.3e-15	1	68304.7	HUMAN	V-type proton ATPase catalytic subunit A
[40]	Q13616	Gln->pyro-Glu	Q	14	-	42	54.3	8.67	1.9e-15	727.87	2	3.4	QIGLDQIWDDLR	Gln->pyro-Glu@1	MDA_143_FTMSms2hcd	54.665	1	35.5	2.9e-10	1	89679.3	HUMAN	Cullin-1
[40]	Q13616	Oxidation	M	111	-	42	54.3	8.67	1.9e-15	776.055	3	1.3	NYLTNLLKDGEDLMDESVLK	Oxidation@14	MDA_143_FTMSms2hcd	48.18	1	25.6	6.1e-05	1	89679.3	HUMAN	Cullin-1
[40]	Q13616	Oxidation	M	261	-	42	54.3	8.67	1.9e-15	980.454	2	0.45	ESTEFLQQNPVTEYMK	Oxidation@15	MDA_143_FTMSms2hcd	34.903	1	59.3	8.6e-15	1	89679.3	HUMAN	Cullin-1
[40]	Q13616	Oxidation	M	322	-	42	54.3	8.67	1.9e-15	449.726	2	0.68	MYNLVSR	Oxidation@1	MDA_143_FTMSms2hcd	23.419	1	24.9	2.3e-05	1	89679.3	HUMAN	Cullin-1
[40]	Q13616	Oxidation	M	365	-	42	54.3	8.67	1.9e-15	450.236	3	0.15	MYVQTVLDVHK	Oxidation@1	MDA_143_FTMSms2hcd	28.371	1	22.1	4.5e-05	1	89679.3	HUMAN	Cullin-1
[40]	Q13616	Oxidation	M	382	-	42	54.3	8.67	1.9e-15	1124.04	2	3.2	YNALVMSAFNNDAGFVAALDK	Oxidation@6	MDA_143_FTMSms2hcd	46.619	1	62	3.5e-14	1	89679.3	HUMAN	Cullin-1
[40]	Q13616	Oxidation	M	450	-	42	54.3	8.67	1.9e-15	841.749	3	1.8	SSKNPEEAELEDTLNQVMVVFK	Oxidation@18	MDA_143_FTMSms2hcd	47.67	1	51	1.3e-13	1	89679.3	HUMAN	Cullin-1
[40]	Q13616	Oxidation	M	488	-	42	54.3	8.67	1.9e-15	692.333	3	1.7	RLVHQNSASDDAEASMISK	Oxidation@16	MDA_143_FTMSms2hcd	18.375	1	40.3	2.4e-10	1	89679.3	HUMAN	Cullin-1
[40]	Q13616	Oxidation	M	507	-	42	54.3	8.67	1.9e-15	520.758	2	0.98	MFQDIGVSK	Oxidation@1	MDA_143_FTMSms2hcd	25.049	1	34.5	6.4e-08	1	89679.3	HUMAN	Cullin-1
[40]	Q13616	Oxidation	M	688	-	42	54.3	8.67	1.9e-15	465.758	2	0.23	VNINVPMK	Oxidation@7	MDA_143_FTMSms2hcd	24.617	1	28.8	4.5e-05	1	89679.3	HUMAN	Cullin-1
[40-1, 138-1]	Q9H0D6	Oxidation	M	319	-	5	5.1	6.51	1.9e-11	886.435	2	2.9	ELTMASLPFTFDVER	Oxidation@4	MDA_143_FTMSms2hcd	45.326	1	43.8	1.9e-11	1	108583	HUMAN	5'-3' exoribonuclease 2
[41]	Q08J23	Gln->pyro-Glu	Q	161	-	42	56.1	8.28	9.9e-15	726.736	3	3.1	QEAVSMIPPLLLNVRPHHK	Gln->pyro-Glu@1;Oxidation@6	MDA_143_FTMSms2hcd	41.798	1	41	2.5e-10	1	86471.5	HUMAN	RNA cytosine C(5)-methyltransferase NSUN2
[41]	Q08J23	Oxidation	M	67	-	42	56.1	8.28	9.9e-15	882.427	2	2.4	IVPEGEWGQFMDALR	Oxidation@11	MDA_143_FTMSms2hcd	41.965	1	52.3	1.9e-12	1	86471.5	HUMAN	RNA cytosine C(5)-methyltransferase NSUN2
[41]	Q08J23	Oxidation	M	166	-	42	56.1	8.28	9.9e-15	726.736	3	3.1	QEAVSMIPPLLLNVRPHHK	Gln->pyro-Glu@1;Oxidation@6	MDA_143_FTMSms2hcd	41.798	1	41	2.5e-10	1	86471.5	HUMAN	RNA cytosine C(5)-methyltransferase NSUN2
[41]	Q08J23	Oxidation	M	197	-	42	56.1	8.28	9.9e-15	862.425	4	1.6	TTQLIEMLHADMNVPFPEGFVIANDVDNKR	Oxidation@7;Oxidation@12	MDA_143_FTMSms2hcd	45.598	1	45.6	7.3e-10	1	86471.5	HUMAN	RNA cytosine C(5)-methyltransferase NSUN2
[41]	Q08J23	Oxidation	M	202	-	42	56.1	8.28	9.9e-15	862.425	4	1.6	TTQLIEMLHADMNVPFPEGFVIANDVDNKR	Oxidation@7;Oxidation@12	MDA_143_FTMSms2hcd	45.598	1	45.6	7.3e-10	1	86471.5	HUMAN	RNA cytosine C(5)-methyltransferase NSUN2
[41]	Q08J23	Oxidation	M	358	-	42	56.1	8.28	9.9e-15	581.79	2	1.7	WMPGITQWK	Oxidation@2	MDA_143_FTMSms2hcd	34.104	1	28.9	7.1e-06	1	86471.5	HUMAN	RNA cytosine C(5)-methyltransferase NSUN2
[41]	Q08J23	Oxidation	M	392	-	42	56.1	8.28	9.9e-15	485.253	4	0.81	HTQIRPTMFPPKDPEK	Oxidation@8	MDA_143_FTMSms2hcd	22.785	1	21.3	0.00044	1	86471.5	HUMAN	RNA cytosine C(5)-methyltransferase NSUN2
[41]	Q08J23	Oxidation	M	404	-	42	56.1	8.28	9.9e-15	338.512	3	0.27	LQAMHLER	Oxidation@4	MDA_143_FTMSms2hcd	16.921	1	19.1	0.00017	1	86471.5	HUMAN	RNA cytosine C(5)-methyltransferase NSUN2
[41]	Q08J23	Oxidation	M	546	-	42	56.1	8.28	9.9e-15	382.21	2	0.31	MNLLTR	Oxidation@1	MDA_143_FTMSms2hcd	21.577	1	21.5	0.002	1	86471.5	HUMAN	RNA cytosine C(5)-methyltransferase NSUN2
[41]	Q08J23	Oxidation	M	562	-	42	56.1	8.28	9.9e-15	442.731	2	0.12	QLYMVSK	Oxidation@4	MDA_143_FTMSms2hcd	20.99	1	28.4	3.9e-07	1	86471.5	HUMAN	RNA cytosine C(5)-methyltransferase NSUN2
[41]	Q08J23	Oxidation	M	624	-	42	56.1	8.28	9.9e-15	575.805	2	0.97	IITVSMEDVK	Oxidation@6	MDA_143_FTMSms2hcd	25.666	1	37.8	3.3e-08	1	86471.5	HUMAN	RNA cytosine C(5)-methyltransferase NSUN2
[41]	Q08J23	Oxidation	M	701	-	42	56.1	8.28	9.9e-15	569.778	2	0.94	MMGLEVLGEK	Oxidation@1;Oxidation@2	MDA_143_FTMSms2hcd	29.639	1	34.6	2.1e-07	1	86471.5	HUMAN	RNA cytosine C(5)-methyltransferase NSUN2
[41]	Q08J23	Oxidation	M	702	-	42	56.1	8.28	9.9e-15	569.778	2	0.94	MMGLEVLGEK	Oxidation@1;Oxidation@2	MDA_143_FTMSms2hcd	29.639	1	34.6	2.1e-07	1	86471.5	HUMAN	RNA cytosine C(5)-methyltransferase NSUN2
[42]	O00571	Gln->pyro-Glu	Q	265	-	36	51.4	11.17	4.4e-20	670.883	2	1.5	QYPISLVLAPTR	Gln->pyro-Glu@1	MDA_143_FTMSms2hcd	50.718	1	48.2	1.4e-10	1	73244	HUMAN	ATP-dependent RNA helicase DDX3X
[42]	O00571	Gln->pyro-Glu	Q	565	-	36	51.4	11.17	4.4e-20	720.656	3	1.4	QEVPSWLENMAYEHHYK	Gln->pyro-Glu@1;Oxidation@10	MDA_143_FTMSms2hcd	37.833	1	57.9	5.1e-16	1	73244	HUMAN	ATP-dependent RNA helicase DDX3X
[42]	O00571	Gln->pyro-Glu	Q	604	-	36	51.4	11.17	4.4e-20	672.788	2	1.6	QSSGASSSSFSSSR	Gln->pyro-Glu@1	MDA_143_FTMSms2hcd	19.625	1	43.5	1e-13	1	73244	HUMAN	ATP-dependent RNA helicase DDX3X
[42]	O00571	Met-loss+Acetyl	M	1	-	36	51.4	11.17	4.4e-20	1153.88	3	2.7	MSHVAVENALGLDQQFAGLDLNSSDNQSGGSTASK	Met-loss+Acetyl@1	MDA_143_FTMSms2hcd	44.544	1	83	4.4e-20	1	73244	HUMAN	ATP-dependent RNA helicase DDX3X
[42]	O00571	Oxidation	M	352	-	36	51.4	11.17	4.4e-20	815.061	3	2.4	YLVLDEADRMLDMGFEPQIR	Oxidation@10;Oxidation@13	MDA_143_FTMSms2hcd	41.432	1	32.6	2.8e-07	1	73244	HUMAN	ATP-dependent RNA helicase DDX3X
[42]	O00571	Oxidation	M	355	-	36	51.4	11.17	4.4e-20	815.061	3	2.4	YLVLDEADRMLDMGFEPQIR	Oxidation@10;Oxidation@13	MDA_143_FTMSms2hcd	41.432	1	32.6	2.8e-07	1	73244	HUMAN	ATP-dependent RNA helicase DDX3X
[42]	O00571	Oxidation	M	370	-	36	51.4	11.17	4.4e-20	443.9	3	1.3	RIVEQDTMPPK	Oxidation@8	MDA_143_FTMSms2hcd	17.991	1	27.7	2.8e-07	1	73244	HUMAN	ATP-dependent RNA helicase DDX3X
[42]	O00571	Oxidation	M	379	-	36	51.4	11.17	4.4e-20	665.303	2	1.1	HTMMFSATFPK	Oxidation@3;Oxidation@4	MDA_143_FTMSms2hcd	27.212	1	21.2	4.6e-06	1	73244	HUMAN	ATP-dependent RNA helicase DDX3X
[42]	O00571	Oxidation	M	380	-	36	51.4	11.17	4.4e-20	665.303	2	1.1	HTMMFSATFPK	Oxidation@3;Oxidation@4	MDA_143_FTMSms2hcd	27.212	1	21.2	4.6e-06	1	73244	HUMAN	ATP-dependent RNA helicase DDX3X
[42]	O00571	Oxidation	M	391	-	36	51.4	11.17	4.4e-20	438.734	2	0.87	EIQMLAR	Oxidation@4	MDA_143_FTMSms2hcd	20.29	2	33	0.00059	1	73244	HUMAN	ATP-dependent RNA helicase DDX3X
[42]	O00571	Oxidation	M	574	-	36	51.4	11.17	4.4e-20	720.656	3	1.4	QEVPSWLENMAYEHHYK	Gln->pyro-Glu@1;Oxidation@10	MDA_143_FTMSms2hcd	37.833	1	57.9	5.1e-16	1	73244	HUMAN	ATP-dependent RNA helicase DDX3X
[42-1]	P17844	Gln->pyro-Glu	Q	274	-	37	47.2	7.85	6.2e-14	674.324	2	0.99	QTLMWSATWPK	Gln->pyro-Glu@1;Oxidation@4	MDA_143_FTMSms2hcd	43.881	1	28.9	8.6e-09	2	69148.7	HUMAN	Probable ATP-dependent RNA helicase DDX5
[42-1]	P17844	Gln->pyro-Glu	Q	452	-	37	47.2	7.85	6.2e-14	556.821	2	3	QVSDLISVLR	Gln->pyro-Glu@1	MDA_143_FTMSms2hcd	50.082	1	36.9	7.7e-09	1	69148.7	HUMAN	Probable ATP-dependent RNA helicase DDX5
[42-1]	P17844	Met-loss+Acetyl	M	1	-	37	47.2	7.85	6.2e-14	542.736	2	-0.43	MSGYSSDRDR	Met-loss+Acetyl@1	MDA_143_FTMSms2hcd	14.388	1	33.5	3e-06	1	69148.7	HUMAN	Probable ATP-dependent RNA helicase DDX5
[42-1]	P17844	Oxidation	M	134	-	37	47.2	7.85	6.2e-14	1125.56	3	2.4	QNFTEPTAIQAQGWPVALSGLDMVGVAQTGSGK	Oxidation@23	MDA_143_FTMSms2hcd	48.629	1	63.1	6.2e-14	1	69148.7	HUMAN	Probable ATP-dependent RNA helicase DDX5
[42-1]	P17844	Oxidation	M	253	-	37	47.2	7.85	6.2e-14	882.426	3	1.6	TTYLVLDEADRMLDMGFEPQIR	Oxidation@12;Oxidation@15	MDA_143_FTMSms2hcd	42.92	1	47.9	3.3e-13	1	69148.7	HUMAN	Probable ATP-dependent RNA helicase DDX5
[42-1]	P17844	Oxidation	M	256	-	37	47.2	7.85	6.2e-14	882.426	3	1.6	TTYLVLDEADRMLDMGFEPQIR	Oxidation@12;Oxidation@15	MDA_143_FTMSms2hcd	42.92	1	47.9	3.3e-13	1	69148.7	HUMAN	Probable ATP-dependent RNA helicase DDX5
[42-1]	P17844	Oxidation	M	277	-	37	47.2	7.85	6.2e-14	674.324	2	0.99	QTLMWSATWPK	Gln->pyro-Glu@1;Oxidation@4	MDA_143_FTMSms2hcd	43.881	1	28.9	8.6e-09	2	69148.7	HUMAN	Probable ATP-dependent RNA helicase DDX5
[42-1]	P17844	Oxidation	M	333	-	37	47.2	7.85	6.2e-14	571.26	2	1.7	LMEEIMSEK	Oxidation@2;Oxidation@6	MDA_143_FTMSms2hcd	19.498	1	40.4	3.9e-10	1	69148.7	HUMAN	Probable ATP-dependent RNA helicase DDX5
[42-1]	P17844	Oxidation	M	337	-	37	47.2	7.85	6.2e-14	571.26	2	1.7	LMEEIMSEK	Oxidation@2;Oxidation@6	MDA_143_FTMSms2hcd	19.498	1	40.4	3.9e-10	1	69148.7	HUMAN	Probable ATP-dependent RNA helicase DDX5
[42-1]	P17844	Oxidation	M	369	-	37	47.2	7.85	6.2e-14	433.865	3	0.46	DGWPAMGIHGDK	Oxidation@6	MDA_143_FTMSms2hcd	24.079	1	36.9	2e-09	1	69148.7	HUMAN	Probable ATP-dependent RNA helicase DDX5
[42-2]	Q92841	Gln->pyro-Glu	Q	351	-	29	40.9	7.96	3.9e-14	674.324	2	0.99	QTLMWSATWPK	Gln->pyro-Glu@1;Oxidation@4	MDA_143_FTMSms2hcd	43.881	1	28.9	8.6e-09	2	80273.1	HUMAN	Probable ATP-dependent RNA helicase DDX17
[42-2]	Q92841	Oxidation	M	80	-	29	40.9	7.96	3.9e-14	747.378	2	1.5	APLPDLYPFGTMR	Oxidation@12	MDA_143_FTMSms2hcd	42.344	1	42.6	8.4e-13	1	80273.1	HUMAN	Probable ATP-dependent RNA helicase DDX17
[42-2]	Q92841	Oxidation	M	211	-	29	40.9	7.96	3.9e-14	590.288	2	1.4	DMVGIAQTGSGK	Oxidation@2	MDA_143_FTMSms2hcd	19.777	1	44	9.7e-12	1	80273.1	HUMAN	Probable ATP-dependent RNA helicase DDX17
[42-2]	Q92841	Oxidation	M	330	-	29	40.9	7.96	3.9e-14	684.818	2	0.8	MLDMGFEPQIR	Oxidation@1;Oxidation@4	MDA_143_FTMSms2hcd	31.479	1	39.9	7.2e-10	3	80273.1	HUMAN	Probable ATP-dependent RNA helicase DDX17
[42-2]	Q92841	Oxidation	M	333	-	29	40.9	7.96	3.9e-14	684.818	2	0.8	MLDMGFEPQIR	Oxidation@1;Oxidation@4	MDA_143_FTMSms2hcd	31.479	1	39.9	7.2e-10	3	80273.1	HUMAN	Probable ATP-dependent RNA helicase DDX17
[42-2]	Q92841	Oxidation	M	354	-	29	40.9	7.96	3.9e-14	674.324	2	0.99	QTLMWSATWPK	Gln->pyro-Glu@1;Oxidation@4	MDA_143_FTMSms2hcd	43.881	1	28.9	8.6e-09	2	80273.1	HUMAN	Probable ATP-dependent RNA helicase DDX17
[42-2]	Q92841	Oxidation	M	410	-	29	40.9	7.96	3.9e-14	740.377	2	1.9	LIQLMEEIMAEK	Oxidation@5;Oxidation@9	MDA_143_FTMSms2hcd	34.083	1	49.7	2.5e-11	1	80273.1	HUMAN	Probable ATP-dependent RNA helicase DDX17
[42-2]	Q92841	Oxidation	M	414	-	29	40.9	7.96	3.9e-14	740.377	2	1.9	LIQLMEEIMAEK	Oxidation@5;Oxidation@9	MDA_143_FTMSms2hcd	34.083	1	49.7	2.5e-11	1	80273.1	HUMAN	Probable ATP-dependent RNA helicase DDX17
[42-2]	Q92841	Oxidation	M	549	-	29	40.9	7.96	3.9e-14	514.272	2	1.2	LMQLVDHR	Oxidation@2	MDA_143_FTMSms2hcd	19.452	1	29.9	5.9e-09	1	80273.1	HUMAN	Probable ATP-dependent RNA helicase DDX17
[43]	P11940	Gln->pyro-Glu	Q	375	-	33	46.5	10.39	1.3e-18	694.823	2	1.4	QAHLTNQYMQR	Gln->pyro-Glu@1;Oxidation@9	MDA_143_FTMSms2hcd	22.004	1	48.2	1.5e-11	1	70671.5	HUMAN	Polyadenylate-binding protein 1
[43]	P11940	Oxidation	M	72	-	33	46.5	10.39	1.3e-18	641.822	2	1.1	ALDTMNFDVIK	Oxidation@5	MDA_143_FTMSms2hcd	34.778	1	47.3	8.9e-10	2	70671.5	HUMAN	Polyadenylate-binding protein 1
[43]	P11940	Oxidation	M	85	-	33	46.5	10.39	1.3e-18	418.708	2	0.23	IMWSQR	Oxidation@2	MDA_143_FTMSms2hcd	21.788	1	25.9	4.8e-05	4	70671.5	HUMAN	Polyadenylate-binding protein 1
[43]	P11940	Oxidation	M	158	-	33	46.5	10.39	1.3e-18	408.534	3	0.28	MNGMLLNDRK	Oxidation@1;Oxidation@4	MDA_143_FTMSms2hcd	17.065	1	25.6	6.4e-05	2	70671.5	HUMAN	Polyadenylate-binding protein 1
[43]	P11940	Oxidation	M	161	-	33	46.5	10.39	1.3e-18	408.534	3	0.28	MNGMLLNDRK	Oxidation@1;Oxidation@4	MDA_143_FTMSms2hcd	17.065	1	25.6	6.4e-05	2	70671.5	HUMAN	Polyadenylate-binding protein 1
[43]	P11940	Oxidation	M	202	-	33	46.5	10.39	1.3e-18	622.231	2	0.93	NFGEDMDDER	Oxidation@6	MDA_143_FTMSms2hcd	17.647	1	33.9	1.3e-18	1	70671.5	HUMAN	Polyadenylate-binding protein 1
[43]	P11940	Oxidation	M	383	-	33	46.5	10.39	1.3e-18	694.823	2	1.4	QAHLTNQYMQR	Gln->pyro-Glu@1;Oxidation@9	MDA_143_FTMSms2hcd	22.004	1	48.2	1.5e-11	1	70671.5	HUMAN	Polyadenylate-binding protein 1
[43]	P11940	Oxidation	M	410	-	33	46.5	10.39	1.3e-18	1052.2	3	3.3	AVPNPVINPYQPAPPSGYFMAAIPQTQNR	Oxidation@20	MDA_143_FTMSms2hcd	43.742	1	41	7.2e-10	1	70671.5	HUMAN	Polyadenylate-binding protein 1
[43]	P11940	Oxidation	M	490	-	33	46.5	10.39	1.3e-18	799.749	3	1.3	VANTSTQTMGPRPAAAAAAATPAVR	Oxidation@9	MDA_143_FTMSms2hcd	25.257	1	68.7	6.4e-16	1	70671.5	HUMAN	Polyadenylate-binding protein 1
[43]	P11940	Oxidation	M	573	-	33	46.5	10.39	1.3e-18	551.646	3	2.7	LFPLIQAMHPTLAGK	Oxidation@8	MDA_143_FTMSms2hcd	38.457	1	63.8	3.5e-12	1	70671.5	HUMAN	Polyadenylate-binding protein 1
[43]	P11940	Oxidation	M	584	-	33	46.5	10.39	1.3e-18	924.8	3	2	ITGMLLEIDNSELLHMLESPESLR	Oxidation@4;Oxidation@16	MDA_143_FTMSms2hcd	48.109	1	78.8	2.4e-18	2	70671.5	HUMAN	Polyadenylate-binding protein 1
[43]	P11940	Oxidation	M	596	-	33	46.5	10.39	1.3e-18	924.8	3	2	ITGMLLEIDNSELLHMLESPESLR	Oxidation@4;Oxidation@16	MDA_143_FTMSms2hcd	48.109	1	78.8	2.4e-18	2	70671.5	HUMAN	Polyadenylate-binding protein 1
[43-1]	Q13310	Gln->pyro-Glu	Q	273	-	25	38.8	10.24	2.4e-18	364.209	2	0.29	QAELKR	Gln->pyro-Glu@1	MDA_143_FTMSms2hcd	16.727	1	28.3	0.0012	1	70783.5	HUMAN	Polyadenylate-binding protein 4
[43-1]	Q13310	Oxidation	M	72	-	25	38.8	10.24	2.4e-18	641.822	2	1.1	ALDTMNFDVIK	Oxidation@5	MDA_143_FTMSms2hcd	34.778	1	47.3	8.9e-10	2	70783.5	HUMAN	Polyadenylate-binding protein 4
[43-1]	Q13310	Oxidation	M	85	-	25	38.8	10.24	2.4e-18	418.708	2	0.23	IMWSQR	Oxidation@2	MDA_143_FTMSms2hcd	21.788	1	25.9	4.8e-05	4	70783.5	HUMAN	Polyadenylate-binding protein 4
[43-1]	Q13310	Oxidation	M	158	-	25	38.8	10.24	2.4e-18	408.534	3	0.28	MNGMLLNDRK	Oxidation@1;Oxidation@4	MDA_143_FTMSms2hcd	17.065	1	25.6	6.4e-05	2	70783.5	HUMAN	Polyadenylate-binding protein 4
[43-1]	Q13310	Oxidation	M	161	-	25	38.8	10.24	2.4e-18	408.534	3	0.28	MNGMLLNDRK	Oxidation@1;Oxidation@4	MDA_143_FTMSms2hcd	17.065	1	25.6	6.4e-05	2	70783.5	HUMAN	Polyadenylate-binding protein 4
[43-1]	Q13310	Oxidation	M	383	-	25	38.8	10.24	2.4e-18	469.238	3	-0.53	KAHLTNQYMQR	Oxidation@9	MDA_143_FTMSms2hcd	14.442	1	38.5	1.8e-06	1	70783.5	HUMAN	Polyadenylate-binding protein 4
[43-1]	Q13310	Oxidation	M	582	-	25	38.8	10.24	2.4e-18	562.64	3	1.4	LFPLIQTMHSNLAGK	Oxidation@8	MDA_143_FTMSms2hcd	36.034	1	47.2	4.8e-09	1	70783.5	HUMAN	Polyadenylate-binding protein 4
[43-1]	Q13310	Oxidation	M	593	-	25	38.8	10.24	2.4e-18	924.8	3	2	ITGMLLEIDNSELLHMLESPESLR	Oxidation@4;Oxidation@16	MDA_143_FTMSms2hcd	48.109	1	78.8	2.4e-18	2	70783.5	HUMAN	Polyadenylate-binding protein 4
[43-1]	Q13310	Oxidation	M	605	-	25	38.8	10.24	2.4e-18	924.8	3	2	ITGMLLEIDNSELLHMLESPESLR	Oxidation@4;Oxidation@16	MDA_143_FTMSms2hcd	48.109	1	78.8	2.4e-18	2	70783.5	HUMAN	Polyadenylate-binding protein 4
[43-2]	P0CB38	Oxidation	M	84	-	2	4.3	3.36	1.8e-06	418.708	2	0.23	LMWSQR	Oxidation@2	MDA_143_FTMSms2hcd	21.788	1	25.9	4.8e-05	4	41854.3	HUMAN	Polyadenylate-binding protein 4-like
[43-3]	Q5JQF8	Oxidation	M	76	-	3	13.5	2.4	8.3e-06	418.708	2	0.23	IMWSQR	Oxidation@2	MDA_143_FTMSms2hcd	21.788	1	25.9	4.8e-05	4	22799.2	HUMAN	Polyadenylate-binding protein 1-like 2
[44]	Q15046	Gln->pyro-Glu	Q	40	-	39	48.7	8.35	7.5e-15	422.724	2	-1.1	QKELSEK	Gln->pyro-Glu@1	MDA_143_FTMSms2hcd	15.358	1	27.9	2.2e-06	1	68048.7	HUMAN	Lysine--tRNA ligase
[44]	Q15046	Met-loss+Acetyl	M	1	-	39	48.7	8.35	7.5e-15	464.759	2	1.2	MAAVQAAEVK	Met-loss+Acetyl@1	MDA_143_FTMSms2hcd	25.593	1	43.8	7e-08	1	68048.7	HUMAN	Lysine--tRNA ligase
[44]	Q15046	Oxidation	M	157	-	39	48.7	8.35	7.5e-15	467.743	2	0.69	LQVMANSR	Oxidation@4	MDA_143_FTMSms2hcd	17.33	1	40	5e-07	1	68048.7	HUMAN	Lysine--tRNA ligase
[44]	Q15046	Oxidation	M	306	-	39	48.7	8.35	7.5e-15	488.269	2	1.2	MLVVGGIDR	Oxidation@1	MDA_143_FTMSms2hcd	27.911	1	36.4	4e-08	1	68048.7	HUMAN	Lysine--tRNA ligase
[44]	Q15046	Oxidation	M	357	-	39	48.7	8.35	7.5e-15	392.191	2	0.0012	MVSGMVK	Oxidation@1;Oxidation@5	MDA_143_FTMSms2hcd	13.075	1	17.3	0.0015	1	68048.7	HUMAN	Lysine--tRNA ligase
[44]	Q15046	Oxidation	M	361	-	39	48.7	8.35	7.5e-15	392.191	2	0.0012	MVSGMVK	Oxidation@1;Oxidation@5	MDA_143_FTMSms2hcd	13.075	1	17.3	0.0015	1	68048.7	HUMAN	Lysine--tRNA ligase
[44]	Q15046	Oxidation	M	396	-	39	48.7	8.35	7.5e-15	638.832	2	0.28	RINMVEELEK	Oxidation@4	MDA_143_FTMSms2hcd	22.248	1	35.5	5.4e-05	1	68048.7	HUMAN	Lysine--tRNA ligase
[44]	Q15046	Oxidation	M	406	-	39	48.7	8.35	7.5e-15	556.539	4	1.4	ALGMKLPETNLFETEETRK	Oxidation@4	MDA_143_FTMSms2hcd	32.725	1	57.5	5.9e-11	1	68048.7	HUMAN	Lysine--tRNA ligase
[44]	Q15046	Oxidation	M	491	-	39	48.7	8.35	7.5e-15	465.244	2	1.1	FELFVMK	Oxidation@6	MDA_143_FTMSms2hcd	35.924	1	34.1	1.1e-07	1	68048.7	HUMAN	Lysine--tRNA ligase
[44]	Q15046	Oxidation	M	556	-	39	48.7	8.35	7.5e-15	684.846	2	1.1	VAMFLTDSNNIK	Oxidation@3	MDA_143_FTMSms2hcd	30.387	1	46.6	2.9e-09	1	68048.7	HUMAN	Lysine--tRNA ligase
[44]	Q15046	Oxidation	M	573	-	39	48.7	8.35	7.5e-15	511.607	3	1.5	EVLLFPAMKPEDK	Oxidation@8	MDA_143_FTMSms2hcd	32.634	2	51.6	1e-09	1	68048.7	HUMAN	Lysine--tRNA ligase
[45]	Q9Y5L0	Gln->pyro-Glu	Q	894	-	32	36.6	9.07	3.4e-16	436.22	2	1.2	QLTDFHK	Gln->pyro-Glu@1	MDA_143_FTMSms2hcd	26.487	1	29.4	2e-06	1	104204	HUMAN	Transportin-3
[45]	Q9Y5L0	Oxidation	M	488	-	32	36.6	9.07	3.4e-16	921.944	2	1.5	YTSIELVGEMSEVVDR	Oxidation@10	MDA_143_FTMSms2hcd	35.576	1	49.6	1.3e-12	1	104204	HUMAN	Transportin-3
[45]	Q9Y5L0	Oxidation	M	507	-	32	36.6	9.07	3.4e-16	825.933	2	2.3	NPQFLDPVLGYLMK	Oxidation@13	MDA_143_FTMSms2hcd	48.244	1	48.5	2.1e-13	1	104204	HUMAN	Transportin-3
[45]	Q9Y5L0	Oxidation	M	534	-	32	36.6	9.07	3.4e-16	589.959	3	0.98	DHMAQHFNGLLEIAR	Oxidation@3	MDA_143_FTMSms2hcd	33.262	1	48.2	8.1e-14	1	104204	HUMAN	Transportin-3
[46]	Q15437	Met-loss+Acetyl	M	1	-	33	46.8	9.67	2.7e-17	841.906	2	2.1	MATYLEFIQQNEER	Met-loss+Acetyl@1	MDA_143_FTMSms2hcd	47.948	1	53.6	2e-10	1	86480	HUMAN	Protein transport protein Sec23B
[46]	Q15437	Oxidation	M	111	-	33	46.8	9.67	2.7e-17	1213.93	3	1.1	NQFPPAYGGISEVNQPAELMPQFSTIEYVIQR	Oxidation@20	MDA_143_FTMSms2hcd	50.25	1	61	9.3e-15	1	86480	HUMAN	Protein transport protein Sec23B
[46]	Q15437	Oxidation	M	240	-	33	46.8	9.67	2.7e-17	549.62	3	1.5	IDMNLTDLLGELQR	Oxidation@3	MDA_143_FTMSms2hcd	47.876	1	41.6	1.7e-06	2	86480	HUMAN	Protein transport protein Sec23B
[46]	Q15437	Oxidation	M	289	-	33	46.8	9.67	2.7e-17	1138.57	2	2.7	IMLFTGGPPTQGPGMVVGDELK	Oxidation@2;Oxidation@15	MDA_143_FTMSms2hcd	42.071	1	73.1	7.1e-15	1	86480	HUMAN	Protein transport protein Sec23B
[46]	Q15437	Oxidation	M	302	-	33	46.8	9.67	2.7e-17	1138.57	2	2.7	IMLFTGGPPTQGPGMVVGDELK	Oxidation@2;Oxidation@15	MDA_143_FTMSms2hcd	42.071	1	73.1	7.1e-15	1	86480	HUMAN	Protein transport protein Sec23B
[46]	Q15437	Oxidation	M	335	-	33	46.8	9.67	2.7e-17	525.245	2	0.41	HYEMLANR	Oxidation@4	MDA_143_FTMSms2hcd	16	1	39.9	2.1e-08	1	86480	HUMAN	Protein transport protein Sec23B
[46]	Q15437	Oxidation	M	402	-	33	46.8	9.67	2.7e-17	534.774	2	0.3	MAFGATLDVK	Oxidation@1	MDA_143_FTMSms2hcd	30.529	1	35.4	1e-07	1	86480	HUMAN	Protein transport protein Sec23B
[46]	Q15437	Oxidation	M	528	-	33	46.8	9.67	2.7e-17	620.31	3	1.6	HIEAAFDQEAAAVLMAR	Oxidation@15	MDA_143_FTMSms2hcd	39.293	1	54.1	3.4e-13	1	86480	HUMAN	Protein transport protein Sec23B
[46]	Q15437	Oxidation	M	583	-	33	46.8	9.67	2.7e-17	668.662	3	1.2	LSDSFSLYPQFMFHLR	Oxidation@12	MDA_143_FTMSms2hcd	45.708	1	56.8	2.5e-12	1	86480	HUMAN	Protein transport protein Sec23B
[46]	Q15437	Oxidation	M	620	-	33	46.8	9.67	2.7e-17	1040.79	4	1	QDLTQSLIMIQPILYSYSFHGPPEPVLLDSSSILADR	Oxidation@9	MDA_143_FTMSms2hcd	57.013	1	46.4	2.3e-10	1	86480	HUMAN	Protein transport protein Sec23B
[46]	Q15437	Oxidation	M	677	-	33	46.8	9.67	2.7e-17	804.339	2	1.5	AGYQDMPEYENFK	Oxidation@6	MDA_143_FTMSms2hcd	27.459	1	43.2	2.7e-12	1	86480	HUMAN	Protein transport protein Sec23B
[46]	Q15437	Oxidation	M	704	-	33	46.8	9.67	2.7e-17	332.168	2	0.35	FPMPR	Oxidation@3	MDA_143_FTMSms2hcd	20.412	1	18.8	0.00015	2	86480	HUMAN	Protein transport protein Sec23B
[46-1]	Q15436	Met-loss+Acetyl	M	1	-	22	27.6	10.4	1.2e-18	856.912	2	2.9	MTTYLEFIQQNEER	Met-loss+Acetyl@1	MDA_143_FTMSms2hcd	47.052	1	47	1.4e-10	1	86161.6	HUMAN	Protein transport protein Sec23A
[46-1]	Q15436	Oxidation	M	34	-	22	27.6	10.4	1.2e-18	701.414	2	2.5	MVVPVAALFTPLK	Oxidation@1	MDA_143_FTMSms2hcd	49.39	1	39.5	1.5e-10	1	86161.6	HUMAN	Protein transport protein Sec23A
[46-1]	Q15436	Oxidation	M	238	-	22	27.6	10.4	1.2e-18	549.62	3	1.5	IDMNLTDLLGELQR	Oxidation@3	MDA_143_FTMSms2hcd	47.876	1	41.6	1.7e-06	2	86161.6	HUMAN	Protein transport protein Sec23A
[46-1]	Q15436	Oxidation	M	702	-	22	27.6	10.4	1.2e-18	332.168	2	0.35	FPMPR	Oxidation@3	MDA_143_FTMSms2hcd	20.412	1	18.8	0.00015	2	86161.6	HUMAN	Protein transport protein Sec23A
[47]	O14744	Met-loss+Acetyl	M	1	-	34	47.3	10.2	2.7e-18	531.754	2	1.2	MAAMAVGGAGGSR	Met-loss+Acetyl@1;Oxidation@4	MDA_143_FTMSms2hcd	20.527	1	44.7	5.6e-10	1	72684.5	HUMAN	Protein arginine N-methyltransferase 5
[47]	O14744	Oxidation	M	4	-	34	47.3	10.2	2.7e-18	531.754	2	1.2	MAAMAVGGAGGSR	Met-loss+Acetyl@1;Oxidation@4	MDA_143_FTMSms2hcd	20.527	1	44.7	5.6e-10	1	72684.5	HUMAN	Protein arginine N-methyltransferase 5
[47]	O14744	Oxidation	M	150	-	34	47.3	10.2	2.7e-18	556.515	4	1.9	VLTNHIHTGHHSSMFWMR	Oxidation@14;Oxidation@17	MDA_143_FTMSms2hcd	23.011	2	52.8	1.1e-13	1	72684.5	HUMAN	Protein arginine N-methyltransferase 5
[47]	O14744	Oxidation	M	153	-	34	47.3	10.2	2.7e-18	556.515	4	1.9	VLTNHIHTGHHSSMFWMR	Oxidation@14;Oxidation@17	MDA_143_FTMSms2hcd	23.011	2	52.8	1.1e-13	1	72684.5	HUMAN	Protein arginine N-methyltransferase 5
[47]	O14744	Oxidation	M	187	-	34	47.3	10.2	2.7e-18	460.542	3	0.24	TWMWWHNFR	Oxidation@3	MDA_143_FTMSms2hcd	39.189	1	43	8.1e-10	1	72684.5	HUMAN	Protein arginine N-methyltransferase 5
[47]	O14744	Oxidation	M	316	-	34	47.3	10.2	2.7e-18	1235.92	3	0.84	GYEDYLQSPLQPLMDNLESQTYEVFEKDPIK	Oxidation@14	MDA_143_FTMSms2hcd	50.939	1	78.3	2.7e-18	1	72684.5	HUMAN	Protein arginine N-methyltransferase 5
[47]	O14744	Oxidation	M	362	-	34	47.3	10.2	2.7e-18	734.049	3	2.8	VPEEEKDTNVQVLMVLGAGR	Oxidation@14	MDA_143_FTMSms2hcd	37.712	1	51	4.2e-10	1	72684.5	HUMAN	Protein arginine N-methyltransferase 5
[47]	O14744	Oxidation	M	500	-	34	47.3	10.2	2.7e-18	532.007	4	2.2	EKDRDPEAQFEMPYVVR	Oxidation@12	MDA_143_FTMSms2hcd	29.068	2	47.2	8.7e-10	1	72684.5	HUMAN	Protein arginine N-methyltransferase 5
[47]	O14744	Oxidation	M	529	-	34	47.3	10.2	2.7e-18	495.719	2	-0.4	DPMIDNNR	Oxidation@3	MDA_143_FTMSms2hcd	15.508	1	29.1	3.1e-08	1	72684.5	HUMAN	Protein arginine N-methyltransferase 5
[48]	P11586	Gln->pyro-Glu	Q	411	-	39	41.8	7.76	9e-14	571.797	2	2.5	QPSQGPTFGIK	Gln->pyro-Glu@1	MDA_143_FTMSms2hcd	33.319	1	16.8	0.00013	1	101532	HUMAN	C-1-tetrahydrofolate synthase, cytoplasmic
[48]	P11586	Oxidation	M	82	-	39	41.8	7.76	9e-14	521.242	2	-0.71	TTTESEVMK	Oxidation@8	MDA_143_FTMSms2hcd	13.973	1	30.4	1e-10	1	101532	HUMAN	C-1-tetrahydrofolate synthase, cytoplasmic
[48]	P11586	Oxidation	M	221	-	39	41.8	7.76	9e-14	903.798	3	1.7	TAHLDEEVNKGDILVVATGQPEMVK	Oxidation@23	MDA_143_FTMSms2hcd	34.461	1	46.1	2.2e-11	1	101532	HUMAN	C-1-tetrahydrofolate synthase, cytoplasmic
[48]	P11586	Oxidation	M	304	-	39	41.8	7.76	9e-14	726.87	2	1.5	WMIQYNNLNLK	Oxidation@2	MDA_143_FTMSms2hcd	38.131	1	28.8	2.6e-08	1	101532	HUMAN	C-1-tetrahydrofolate synthase, cytoplasmic
[48]	P11586	Oxidation	M	615	-	39	41.8	7.76	9e-14	706.378	3	1.8	KGEPVSAEDLGVSGALTVLMK	Oxidation@20	MDA_143_FTMSms2hcd	41.361	1	59.1	3.3e-13	1	101532	HUMAN	C-1-tetrahydrofolate synthase, cytoplasmic
[48]	P11586	Oxidation	M	677	-	39	41.8	7.76	9e-14	1120.05	2	1.7	LVGPEGFVVTEAGFGADIGMEK	Oxidation@20	MDA_143_FTMSms2hcd	45.535	1	58.5	9e-14	1	101532	HUMAN	C-1-tetrahydrofolate synthase, cytoplasmic
[48]	P11586	Oxidation	M	747	-	39	41.8	7.76	9e-14	754.422	2	1.6	MFGIPVVVAVNAFK	Oxidation@1	MDA_143_FTMSms2hcd	50.08	1	36	4.1e-11	1	101532	HUMAN	C-1-tetrahydrofolate synthase, cytoplasmic
[49]	P17812	Oxidation	M	1	-	36	42.6	7.9	5e-14	551.32	3	0.91	MKYILVTGGVISGIGK	Oxidation@1	MDA_143_FTMSms2hcd	37.123	1	38.6	3.8e-10	2	66690.9	HUMAN	CTP synthase 1
[49]	P17812	Oxidation	M	126	-	36	42.6	7.9	5e-14	713.375	3	1.4	TVQVVPHITDAIQEWVMR	Oxidation@17	MDA_143_FTMSms2hcd	45.989	1	63	5e-14	1	66690.9	HUMAN	CTP synthase 1
[49]	P17812	Oxidation	M	288	-	36	42.6	7.9	5e-14	317.816	3	-0.98	WKEMADR	Oxidation@4	MDA_143_FTMSms2hcd	13.916	1	24.4	4e-07	1	66690.9	HUMAN	CTP synthase 1
[49]	P17812	Phospho	S	575	6	36	42.6	7.9	5e-14	776.343	3	2.7	SGSSSPDSEITELKFPSINHD	Phospho@5=6	MDA_143_FTMSms2hcd	40.626	1	59.8	4.4e-12	1	66690.9	HUMAN	CTP synthase 1
[49-1]	Q9NRF8	Oxidation	M	1	-	23	44.9	7.92	4.7e-14	551.32	3	0.91	MKYILVTGGVISGIGK	Oxidation@1	MDA_143_FTMSms2hcd	37.123	1	38.6	3.8e-10	2	65678.1	HUMAN	CTP synthase 2
[49-1]	Q9NRF8	Oxidation	M	126	-	23	44.9	7.92	4.7e-14	803.748	3	3.1	TVQVVPHITDAVQEWVMNQAK	Oxidation@17	MDA_143_FTMSms2hcd	45.339	1	27.5	2.4e-07	1	65678.1	HUMAN	CTP synthase 2
[49-1]	Q9NRF8	Oxidation	M	224	-	23	44.9	7.92	4.7e-14	539.777	2	1.3	SSTPIEMAVK	Oxidation@7	MDA_143_FTMSms2hcd	23.301	1	35.4	1e-07	1	65678.1	HUMAN	CTP synthase 2
[49-1]	Q9NRF8	Oxidation	M	335	-	23	44.9	7.92	4.7e-14	791.906	2	1.3	LNLMYIDSIDLEK	Oxidation@4	MDA_143_FTMSms2hcd	42.63	1	43.8	2.4e-09	1	65678.1	HUMAN	CTP synthase 2
[49-1]	Q9NRF8	Oxidation	M	436	-	23	44.9	7.92	4.7e-14	870.665	4	2.2	DADSTEFRPNAPVPLVIDMPEHNPGNLGGTMR	Oxidation@19;Oxidation@31	MDA_143_FTMSms2hcd	38.515	1	54.7	8.2e-13	1	65678.1	HUMAN	CTP synthase 2
[49-1]	Q9NRF8	Oxidation	M	448	-	23	44.9	7.92	4.7e-14	870.665	4	2.2	DADSTEFRPNAPVPLVIDMPEHNPGNLGGTMR	Oxidation@19;Oxidation@31	MDA_143_FTMSms2hcd	38.515	1	54.7	8.2e-13	1	65678.1	HUMAN	CTP synthase 2
[50]	Q92945	Acetyl	K	473	-	33	46.1	9.43	7.3e-17	637.688	3	-0.077	QLPPNGDPNFKLFIIR	Acetyl@11	MDA_143_FTMSms2hcd	29.566	1	17.6	0.00087	1	73115.9	HUMAN	Far upstream element-binding protein 2
[50]	Q92945	Oxidation	M	145	-	33	46.1	9.43	7.3e-17	752.706	3	0.92	TSMTEEYRVPDGMVGLIIGR	Oxidation@3;Oxidation@13	MDA_143_FTMSms2hcd	37.037	1	63.4	3.3e-15	1	73115.9	HUMAN	Far upstream element-binding protein 2
[50]	Q92945	Oxidation	M	155	-	33	46.1	9.43	7.3e-17	752.706	3	0.92	TSMTEEYRVPDGMVGLIIGR	Oxidation@3;Oxidation@13	MDA_143_FTMSms2hcd	37.037	1	63.4	3.3e-15	1	73115.9	HUMAN	Far upstream element-binding protein 2
[50]	Q92945	Oxidation	M	206	-	33	46.1	9.43	7.3e-17	556.26	2	0.82	MMLDDIVSR	Oxidation@1;Oxidation@2	MDA_143_FTMSms2hcd	27.186	1	38.5	8.8e-08	1	73115.9	HUMAN	Far upstream element-binding protein 2
[50]	Q92945	Oxidation	M	207	-	33	46.1	9.43	7.3e-17	556.26	2	0.82	MMLDDIVSR	Oxidation@1;Oxidation@2	MDA_143_FTMSms2hcd	27.186	1	38.5	8.8e-08	1	73115.9	HUMAN	Far upstream element-binding protein 2
[50]	Q92945	Oxidation	M	267	-	33	46.1	9.43	7.3e-17	686.694	3	1.3	MILIQDGSQNTNVDKPLR	Oxidation@1	MDA_143_FTMSms2hcd	28.878	1	60.5	6.8e-12	1	73115.9	HUMAN	Far upstream element-binding protein 2
[50]	Q92945	Oxidation	M	373	-	33	46.1	9.43	7.3e-17	374.863	3	2.9	IAHIMGPPDR	Oxidation@5	MDA_143_FTMSms2hcd	20.716	1	21.9	2.9e-05	1	73115.9	HUMAN	Far upstream element-binding protein 2
[50-1]	Q96AE4	Oxidation	M	101	-	27	41.3	8.69	1.8e-15	501.726	2	0.68	SVMTEEYK	Oxidation@3	MDA_143_FTMSms2hcd	16.281	1	25	1.5e-07	1	67560.9	HUMAN	Far upstream element-binding protein 1
[50-1]	Q96AE4	Oxidation	M	111	-	27	41.3	8.69	1.8e-15	754.039	3	1.3	SVMTEEYKVPDGMVGFIIGR	Oxidation@3;Oxidation@13	MDA_143_FTMSms2hcd	38.732	1	55.8	1.6e-13	1	67560.9	HUMAN	Far upstream element-binding protein 1
[50-1]	Q96AE4	Oxidation	M	191	-	27	41.3	8.69	1.8e-15	664.832	4	1.1	GRPAPGFHHGDGPGNAVQEIMIPASK	Oxidation@21	MDA_143_FTMSms2hcd	29.241	1	58.7	2.5e-10	1	67560.9	HUMAN	Far upstream element-binding protein 1
[50-1]	Q96AE4	Oxidation	M	219	-	27	41.3	8.69	1.8e-15	668.329	3	1.4	MVMIQDGPQNTGADKPLR	Oxidation@1;Oxidation@3	MDA_143_FTMSms2hcd	24.47	1	68.9	1.8e-15	1	67560.9	HUMAN	Far upstream element-binding protein 1
[50-1]	Q96AE4	Oxidation	M	221	-	27	41.3	8.69	1.8e-15	668.329	3	1.4	MVMIQDGPQNTGADKPLR	Oxidation@1;Oxidation@3	MDA_143_FTMSms2hcd	24.47	1	68.9	1.8e-15	1	67560.9	HUMAN	Far upstream element-binding protein 1
[50-1]	Q96AE4	Oxidation	M	250	-	27	41.3	8.69	1.8e-15	509.784	2	1.6	EMVLELIR	Oxidation@2	MDA_143_FTMSms2hcd	36.275	1	33.4	1.9e-05	2	67560.9	HUMAN	Far upstream element-binding protein 1
[50-1]	Q96AE4	Oxidation	M	424	-	27	41.3	8.69	1.8e-15	605.78	2	0.19	NPPPNADPNMK	Oxidation@10	MDA_143_FTMSms2hcd	14.954	1	53.8	1.6e-11	1	67560.9	HUMAN	Far upstream element-binding protein 1
[50-1]	Q96AE4	Oxidation	M	593	-	27	41.3	8.69	1.8e-15	975.45	3	1.9	MGQAVPAPTGAPPGGQPDYSAAWAEYYR	Oxidation@1	MDA_143_FTMSms2hcd	39.909	1	48.8	5.4e-12	1	67560.9	HUMAN	Far upstream element-binding protein 1
[50-2]	Q96I24	Oxidation	M	227	-	5	4.5	4.07	6.2e-07	509.784	2	1.6	EMVLEIIR	Oxidation@2	MDA_143_FTMSms2hcd	36.275	1	33.4	1.9e-05	2	61640.9	HUMAN	Far upstream element-binding protein 3
[51]	Q12906	Oxidation	M	15	-	29	34.5	9.03	4.1e-16	487.582	3	1	IFVNDDRHVMAK	Oxidation@10	MDA_143_FTMSms2hcd	19.96	1	39.1	4.1e-09	1	95339.2	HUMAN	Interleukin enhancer-binding factor 3
[51]	Q12906	Oxidation	M	34	-	29	34.5	9.03	4.1e-16	896.418	3	1.2	HSSVYPTQEELEAVQNMVSHTER	Oxidation@17	MDA_143_FTMSms2hcd	34.996	1	57.7	2e-15	1	95339.2	HUMAN	Interleukin enhancer-binding factor 3
[51]	Q12906	Oxidation	M	266	-	29	34.5	9.03	4.1e-16	539.611	3	0.89	SIGTANRPMGAGEALR	Oxidation@9	MDA_143_FTMSms2hcd	21.913	1	39.7	2.6e-08	1	95339.2	HUMAN	Interleukin enhancer-binding factor 3
[51]	Q12906	Oxidation	M	336	-	29	34.5	9.03	4.1e-16	536.789	2	0.95	VLGMDPLPSK	Oxidation@4	MDA_143_FTMSms2hcd	26.912	1	41.9	6.4e-08	1	95339.2	HUMAN	Interleukin enhancer-binding factor 3
[51]	Q12906	Oxidation	M	370	-	29	34.5	9.03	4.1e-16	865.761	3	2	NENPVDYTVQIPPSTTYAITPMK	Oxidation@22	MDA_143_FTMSms2hcd	40.614	1	33.6	7.2e-08	1	95339.2	HUMAN	Interleukin enhancer-binding factor 3
[51]	Q12906	Oxidation	M	374	-	29	34.5	9.03	4.1e-16	572.238	3	-0.42	RPMEEDGEEKSPSK	Oxidation@3;Phospho@11=15	MDA_143_FTMSms2hcd	12.398	1	52.6	8.6e-14	1	95339.2	HUMAN	Interleukin enhancer-binding factor 3
[51]	Q12906	Oxidation	M	403	-	29	34.5	9.03	4.1e-16	680.822	2	1.3	AEPPQAMNALMR	Oxidation@7;Oxidation@11	MDA_143_FTMSms2hcd	22.425	1	47.1	5.1e-08	1	95339.2	HUMAN	Interleukin enhancer-binding factor 3
[51]	Q12906	Oxidation	M	407	-	29	34.5	9.03	4.1e-16	680.822	2	1.3	AEPPQAMNALMR	Oxidation@7;Oxidation@11	MDA_143_FTMSms2hcd	22.425	1	47.1	5.1e-08	1	95339.2	HUMAN	Interleukin enhancer-binding factor 3
[51]	Q12906	Oxidation	M	434	-	29	34.5	9.03	4.1e-16	1068.86	3	2.7	LVSQTGPVHAPIFTMSVEVDGNSFEASGPSK	Oxidation@15	MDA_143_FTMSms2hcd	39.606	1	57.2	4.1e-16	1	95339.2	HUMAN	Interleukin enhancer-binding factor 3
[51]	Q12906	Oxidation	M	465	-	29	34.5	9.03	4.1e-16	730.365	2	1.8	VLQDMGLPTGAEGR	Oxidation@5	MDA_143_FTMSms2hcd	26.761	1	51	6.8e-11	1	95339.2	HUMAN	Interleukin enhancer-binding factor 3
[51]	Q12906	Oxidation	M	530	-	29	34.5	9.03	4.1e-16	545.266	2	0.77	NPVMELNEK	Oxidation@4	MDA_143_FTMSms2hcd	21.837	1	34.9	8.5e-08	1	95339.2	HUMAN	Interleukin enhancer-binding factor 3
[51]	Q12906	Oxidation	M	557	-	29	34.5	9.03	4.1e-16	648.812	2	2.4	FVMEVEVDGQK	Oxidation@3	MDA_143_FTMSms2hcd	25.522	1	47.4	3.3e-11	1	95339.2	HUMAN	Interleukin enhancer-binding factor 3
[51]	Q12906	Phospho	S	382	15	29	34.5	9.03	4.1e-16	572.238	3	-0.42	RPMEEDGEEKSPSK	Oxidation@3;Phospho@11=15	MDA_143_FTMSms2hcd	12.398	1	52.6	8.6e-14	1	95339.2	HUMAN	Interleukin enhancer-binding factor 3
[52]	P78344	Gln->pyro-Glu	Q	807	-	38	44	8.63	2.2e-15	715.907	2	-0.042	QLLLSFKPVMQK	Gln->pyro-Glu@1;Oxidation@10	MDA_143_FTMSms2hcd	44.022	1	34.4	1.4e-08	1	102363	HUMAN	Eukaryotic translation initiation factor 4 gamma 2
[52]	P78344	Oxidation	M	274	-	38	44	8.63	2.2e-15	573.767	2	1.3	SLMDQYFAR	Oxidation@3	MDA_143_FTMSms2hcd	27.893	1	23.6	2.6e-05	1	102363	HUMAN	Eukaryotic translation initiation factor 4 gamma 2
[52]	P78344	Oxidation	M	357	-	38	44	8.63	2.2e-15	778.368	2	2.7	SDFFLEGPFMPPR	Oxidation@10	MDA_143_FTMSms2hcd	44.661	1	44.3	4.5e-10	1	102363	HUMAN	Eukaryotic translation initiation factor 4 gamma 2
[52]	P78344	Oxidation	M	374	-	38	44	8.63	2.2e-15	925.777	3	3.3	DPLGGLADMFGQMPGSGIGTGPGVIQDR	Oxidation@9;Oxidation@13	MDA_143_FTMSms2hcd	43.444	1	47.4	1.2e-10	1	102363	HUMAN	Eukaryotic translation initiation factor 4 gamma 2
[52]	P78344	Oxidation	M	378	-	38	44	8.63	2.2e-15	925.777	3	3.3	DPLGGLADMFGQMPGSGIGTGPGVIQDR	Oxidation@9;Oxidation@13	MDA_143_FTMSms2hcd	43.444	1	47.4	1.2e-10	1	102363	HUMAN	Eukaryotic translation initiation factor 4 gamma 2
[52]	P78344	Oxidation	M	398	-	38	44	8.63	2.2e-15	406.192	2	0.029	FSPTMGR	Oxidation@5	MDA_143_FTMSms2hcd	17.465	1	31.4	5.5e-07	1	102363	HUMAN	Eukaryotic translation initiation factor 4 gamma 2
[52]	P78344	Oxidation	M	482	-	38	44	8.63	2.2e-15	594.815	4	1.8	KGQLNADEISLRPAQSFLMNK	Oxidation@19	MDA_143_FTMSms2hcd	36.133	1	33.8	1.1e-07	1	102363	HUMAN	Eukaryotic translation initiation factor 4 gamma 2
[52]	P78344	Oxidation	M	581	-	38	44	8.63	2.2e-15	559.29	2	1.3	HFLPEMLSK	Oxidation@6	MDA_143_FTMSms2hcd	27.04	1	38.1	2.7e-07	1	102363	HUMAN	Eukaryotic translation initiation factor 4 gamma 2
[52]	P78344	Oxidation	M	704	-	38	44	8.63	2.2e-15	687.838	2	0.24	MLPEIDQNKDR	Oxidation@1	MDA_143_FTMSms2hcd	22.093	1	41.7	1.8e-06	1	102363	HUMAN	Eukaryotic translation initiation factor 4 gamma 2
[52]	P78344	Oxidation	M	715	-	38	44	8.63	2.2e-15	474.757	2	0.5	MLEILEGK	Oxidation@1	MDA_143_FTMSms2hcd	30.416	1	31.1	4.7e-06	1	102363	HUMAN	Eukaryotic translation initiation factor 4 gamma 2
[52]	P78344	Oxidation	M	816	-	38	44	8.63	2.2e-15	715.907	2	-0.042	QLLLSFKPVMQK	Gln->pyro-Glu@1;Oxidation@10	MDA_143_FTMSms2hcd	44.022	1	34.4	1.4e-08	1	102363	HUMAN	Eukaryotic translation initiation factor 4 gamma 2
[53]	Q9H3U1	Gln->pyro-Glu	Q	618	-	33	36.2	7.89	5.3e-14	541.773	2	0.7	QHVPEQHPK	Gln->pyro-Glu@1	MDA_143_FTMSms2hcd	15.647	1	27.1	2.7e-07	1	103078	HUMAN	Protein unc-45 homolog A
[53]	Q9H3U1	Oxidation	M	156	-	33	36.2	7.89	5.3e-14	867.936	2	2.1	VEQMFQILLDPEEK	Oxidation@4	MDA_143_FTMSms2hcd	41.417	1	37	1.2e-09	1	103078	HUMAN	Protein unc-45 homolog A
[53]	Q9H3U1	Oxidation	M	206	-	33	36.2	7.89	5.3e-14	847.43	2	1.9	LLDMGETDLMLAALR	Oxidation@4;Oxidation@10	MDA_143_FTMSms2hcd	40.992	1	61	1.5e-12	1	103078	HUMAN	Protein unc-45 homolog A
[53]	Q9H3U1	Oxidation	M	212	-	33	36.2	7.89	5.3e-14	847.43	2	1.9	LLDMGETDLMLAALR	Oxidation@4;Oxidation@10	MDA_143_FTMSms2hcd	40.992	1	61	1.5e-12	1	103078	HUMAN	Protein unc-45 homolog A
[53]	Q9H3U1	Oxidation	M	369	-	33	36.2	7.89	5.3e-14	483.271	2	0.34	MSASILLSK	Oxidation@1	MDA_143_FTMSms2hcd	27.704	1	29.1	1.4e-06	1	103078	HUMAN	Protein unc-45 homolog A
[53]	Q9H3U1	Oxidation	M	515	-	33	36.2	7.89	5.3e-14	593.775	2	2.1	LGSAGGTDFSMK	Oxidation@11	MDA_143_FTMSms2hcd	21.515	1	59.6	5.3e-14	1	103078	HUMAN	Protein unc-45 homolog A
[53]	Q9H3U1	Oxidation	M	609	-	33	36.2	7.89	5.3e-14	353.694	2	0.19	MVELAK	Oxidation@1	MDA_143_FTMSms2hcd	18.163	1	19.9	0.0023	1	103078	HUMAN	Protein unc-45 homolog A
[53]	Q9H3U1	Oxidation	M	723	-	33	36.2	7.89	5.3e-14	854.915	2	1.2	LTITSNPEMTFPGER	Oxidation@9	MDA_143_FTMSms2hcd	32.893	1	52.5	4.2e-13	1	103078	HUMAN	Protein unc-45 homolog A
[53]	Q9H3U1	Oxidation	M	889	-	33	36.2	7.89	5.3e-14	680.866	2	-0.14	GAVVVLNMVEASR	Oxidation@8	MDA_143_FTMSms2hcd	32.096	1	48.7	1.4e-10	1	103078	HUMAN	Protein unc-45 homolog A
[53]	Q9H3U1	Oxidation	M	901	42	33	36.2	7.89	5.3e-14	1129.05	2	-0.47	EIASTLMESEMMEILSVLAK	Oxidation@7=42;Oxidation@11|12	MDA_143_FTMSms2hcd	56.591	1	42.4	7.2e-12	1	103078	HUMAN	Protein unc-45 homolog A
[53]	Q9H3U1	Oxidation	M	905	48	33	36.2	7.89	5.3e-14	1129.05	2	0.33	EIASTLMESEMMEILSVLAK	Oxidation@11=48;Oxidation@12=48	MDA_143_FTMSms2hcd	54.004	1	50.7	2.6e-13	1	103078	HUMAN	Protein unc-45 homolog A
[53]	Q9H3U1	Oxidation	M	906	48	33	36.2	7.89	5.3e-14	1129.05	2	0.33	EIASTLMESEMMEILSVLAK	Oxidation@11=48;Oxidation@12=48	MDA_143_FTMSms2hcd	54.004	1	50.7	2.6e-13	1	103078	HUMAN	Protein unc-45 homolog A
[54]	P27694	Met-loss	M	1	-	29	50	9.51	5.2e-17	766.412	2	0.83	MVGQLSEGAIAAIMQK	Met-loss@1;Oxidation@14	MDA_143_FTMSms2hcd	34.417	1	56.8	6.3e-13	1	68138.8	HUMAN	Replication protein A 70 kDa DNA-binding subunit
[54]	P27694	Oxidation	M	14	-	29	50	9.51	5.2e-17	766.412	2	0.83	MVGQLSEGAIAAIMQK	Met-loss@1;Oxidation@14	MDA_143_FTMSms2hcd	34.417	1	56.8	6.3e-13	1	68138.8	HUMAN	Replication protein A 70 kDa DNA-binding subunit
[54]	P27694	Oxidation	M	97	-	29	50	9.51	5.2e-17	651.393	2	2.2	VVILMELEVLK	Oxidation@5	MDA_143_FTMSms2hcd	46.916	1	50.2	4.8e-09	1	68138.8	HUMAN	Replication protein A 70 kDa DNA-binding subunit
[54]	P27694	Oxidation	M	349	-	29	50	9.51	5.2e-17	579.279	2	0.88	NIYLMDTSGK	Oxidation@5	MDA_143_FTMSms2hcd	24.532	1	26.9	8.8e-08	1	68138.8	HUMAN	Replication protein A 70 kDa DNA-binding subunit
[54]	P27694	Oxidation	M	592	-	29	50	9.51	5.2e-17	470.575	3	0.58	ATVMDVKPVDYR	Oxidation@4	MDA_143_FTMSms2hcd	23.863	1	43	1.8e-11	1	68138.8	HUMAN	Replication protein A 70 kDa DNA-binding subunit
[54]	P27694	Oxidation	M	608	-	29	50	9.51	5.2e-17	445.766	2	0.1	RLVMSIR	Oxidation@4	MDA_143_FTMSms2hcd	19.032	1	15.6	0.0015	1	68138.8	HUMAN	Replication protein A 70 kDa DNA-binding subunit
[55]	Q9NR30	Gln->pyro-Glu	Q	462	-	33	44.6	7.93	4.5e-14	710.348	2	1.6	QDAQSLHGDIPQK	Gln->pyro-Glu@1	MDA_143_FTMSms2hcd	24.856	1	44.9	6.3e-11	1	87345.1	HUMAN	Nucleolar RNA helicase 2
[55]	Q9NR30	Oxidation	M	17	-	33	44.6	7.93	4.5e-14	620.773	2	1.2	SDAGLESDTAMK	Oxidation@11	MDA_143_FTMSms2hcd	17.447	1	43.5	1.2e-12	1	87345.1	HUMAN	Nucleolar RNA helicase 2
[55]	Q9NR30	Oxidation	M	69	-	33	44.6	7.93	4.5e-14	525.928	3	-0.032	KKAEPSEVDMNSPK	Oxidation@10	MDA_143_FTMSms2hcd	14.126	1	46.8	3.2e-11	1	87345.1	HUMAN	Nucleolar RNA helicase 2
[55]	Q9NR30	Oxidation	M	344	-	33	44.6	7.93	4.5e-14	1075.85	3	1.2	HVVLDEVDQMLDMGFADQVEEILSVAYK	Oxidation@10;Oxidation@13	MDA_143_FTMSms2hcd	57.559	1	39.8	1.1e-10	1	87345.1	HUMAN	Nucleolar RNA helicase 2
[55]	Q9NR30	Oxidation	M	347	-	33	44.6	7.93	4.5e-14	1075.85	3	1.2	HVVLDEVDQMLDMGFADQVEEILSVAYK	Oxidation@10;Oxidation@13	MDA_143_FTMSms2hcd	57.559	1	39.8	1.1e-10	1	87345.1	HUMAN	Nucleolar RNA helicase 2
[55]	Q9NR30	Oxidation	M	672	-	33	44.6	7.93	4.5e-14	355.699	2	0.79	GMVFLK	Oxidation@2	MDA_143_FTMSms2hcd	23.983	1	23	1.8e-06	1	87345.1	HUMAN	Nucleolar RNA helicase 2
[55]	Q9NR30	Phospho	S	89	38	33	44.6	7.93	4.5e-14	527.25	3	0.38	KKEEPSQNDISPK	Phospho@11=38	MDA_143_FTMSms2hcd	15.615	1	37.5	2.7e-09	1	87345.1	HUMAN	Nucleolar RNA helicase 2
[56]	P58107	Gln->pyro-Glu	Q	1500	-	24	8.6	9.48	6.1e-17	778.421	2	1.5	QVVSAVTTLVEAAER	Gln->pyro-Glu@1	MDA_143_FTMSms2hcd	55.288	1	45.1	1.4e-10	1	555663	HUMAN	Epiplakin
[56]	P58107	Gln->pyro-Glu	Q	2716	-	24	8.6	9.48	6.1e-17	1029.5	2	3.9	QVSASELHTSGILGPETLR	Gln->pyro-Glu@1;Phospho@3=27	MDA_143_FTMSms2hcd	43.029	1	56.2	3.9e-14	1	555663	HUMAN	Epiplakin
[56]	P58107	Oxidation	M	238	-	24	8.6	9.48	6.1e-17	877.124	3	2.2	SMGGAVSAAELLEVGILDEQAVQGLR	Oxidation@2	MDA_143_FTMSms2hcd	54.506	1	43.6	3e-09	1	555663	HUMAN	Epiplakin
[56]	P58107	Oxidation	M	381	-	24	8.6	9.48	6.1e-17	820.423	5	2.8	AGLVSPELHEQLLVAEQAVTGHHDPFSGSQIPLFQAMK	Oxidation@37	MDA_143_FTMSms2hcd	49.106	1	20.3	8e-06	1	555663	HUMAN	Epiplakin
[56]	P58107	Oxidation	M	706	-	24	8.6	9.48	6.1e-17	1232.1	2	1.8	AVTGYTDPYTGQQISLFQAMQK	Oxidation@20	MDA_143_FTMSms2hcd	39.888	1	69	6.1e-17	1	555663	HUMAN	Epiplakin
[56]	P58107	Phospho	S	2718	27	24	8.6	9.48	6.1e-17	1029.5	2	3.9	QVSASELHTSGILGPETLR	Gln->pyro-Glu@1;Phospho@3=27	MDA_143_FTMSms2hcd	43.029	1	56.2	3.9e-14	1	555663	HUMAN	Epiplakin
[57]	O60506	Oxidation	M	194	-	28	41.9	9.57	4.1e-17	646.821	2	1.2	LMMDPLTGLNR	Oxidation@2;Oxidation@3	MDA_143_FTMSms2hcd	30.901	1	45.6	6.5e-13	1	69603.2	HUMAN	Heterogeneous nuclear ribonucleoprotein Q
[57]	O60506	Oxidation	M	195	-	28	41.9	9.57	4.1e-17	646.821	2	1.2	LMMDPLTGLNR	Oxidation@2;Oxidation@3	MDA_143_FTMSms2hcd	30.901	1	45.6	6.5e-13	1	69603.2	HUMAN	Heterogeneous nuclear ribonucleoprotein Q
[57]	O60506	Oxidation	M	334	-	28	41.9	9.57	4.1e-17	890.752	3	1.3	VWGNVGTVEWADPIEDPDPEVMAK	Oxidation@22	MDA_143_FTMSms2hcd	44.171	1	61.2	7.1e-15	1	69603.2	HUMAN	Heterogeneous nuclear ribonucleoprotein Q
[57]	O60506	Oxidation	M	388	-	28	41.9	9.57	4.1e-17	741.856	4	2.3	AMEEMNGKDLEGENIEIVFAKPPDQK	Oxidation@2;Oxidation@5	MDA_143_FTMSms2hcd	35.438	1	53.8	5.2e-13	1	69603.2	HUMAN	Heterogeneous nuclear ribonucleoprotein Q
[57]	O60506	Oxidation	M	391	-	28	41.9	9.57	4.1e-17	741.856	4	2.3	AMEEMNGKDLEGENIEIVFAKPPDQK	Oxidation@2;Oxidation@5	MDA_143_FTMSms2hcd	35.438	1	53.8	5.2e-13	1	69603.2	HUMAN	Heterogeneous nuclear ribonucleoprotein Q
[57-1]	O43390	Oxidation	M	197	-	22	34.3	7.5	2.8e-13	647.301	2	0.88	LMMDPLSGQNR	Oxidation@2;Oxidation@3	MDA_143_FTMSms2hcd	23.094	1	46.5	3.6e-12	1	70943.6	HUMAN	Heterogeneous nuclear ribonucleoprotein R
[57-1]	O43390	Oxidation	M	198	-	22	34.3	7.5	2.8e-13	647.301	2	0.88	LMMDPLSGQNR	Oxidation@2;Oxidation@3	MDA_143_FTMSms2hcd	23.094	1	46.5	3.6e-12	1	70943.6	HUMAN	Heterogeneous nuclear ribonucleoprotein R
[57-2]	Q92974	Gln->pyro-Glu	Q	236	-	6	9.6	7.45	3.5e-13	702.034	3	2.8	QQDVIYELIQTELHHVR	Gln->pyro-Glu@1	MDA_143_FTMSms2hcd	54.355	1	44.9	7e-09	1	111544	HUMAN	Rho guanine nucleotide exchange factor 2
[57-2]	Q92974	Oxidation	M	763	-	6	9.6	7.45	3.5e-13	914.157	3	4.6	LVNLYGLLHGLQAAVAQQDTLMEAR	Oxidation@22	MDA_143_FTMSms2hcd	55.973	1	26.9	5.8e-09	1	111544	HUMAN	Rho guanine nucleotide exchange factor 2
[58]	O43143	Oxidation	M	68	-	32	40	9.38	9e-17	800.444	2	1.9	ASTNAMLISAGLPPLK	Oxidation@6	MDA_143_FTMSms2hcd	39.603	1	42.5	4.6e-13	1	90933.6	HUMAN	Pre-mRNA-splicing factor ATP-dependent RNA helicase DHX15
[58]	O43143	Oxidation	M	199	-	32	40	9.38	9e-17	368.869	3	-1.6	RVAAMSVAQR	Oxidation@5	MDA_143_FTMSms2hcd	14.726	1	23.5	6.9e-05	1	90933.6	HUMAN	Pre-mRNA-splicing factor ATP-dependent RNA helicase DHX15
[58]	O43143	Oxidation	M	209	-	32	40	9.38	9e-17	1022.47	2	1.7	VADEMDVMLGQEVGYSIR	Oxidation@5;Oxidation@8	MDA_143_FTMSms2hcd	35.285	1	62.1	9e-17	1	90933.6	HUMAN	Pre-mRNA-splicing factor ATP-dependent RNA helicase DHX15
[58]	O43143	Oxidation	M	212	-	32	40	9.38	9e-17	1022.47	2	1.7	VADEMDVMLGQEVGYSIR	Oxidation@5;Oxidation@8	MDA_143_FTMSms2hcd	35.285	1	62.1	9e-17	1	90933.6	HUMAN	Pre-mRNA-splicing factor ATP-dependent RNA helicase DHX15
[58]	O43143	Oxidation	M	236	-	32	40	9.38	9e-17	566.264	2	2.3	YMTDGMLLR	Oxidation@2;Oxidation@6	MDA_143_FTMSms2hcd	25.534	1	32.3	6.1e-05	2	90933.6	HUMAN	Pre-mRNA-splicing factor ATP-dependent RNA helicase DHX15
[58]	O43143	Oxidation	M	240	-	32	40	9.38	9e-17	566.264	2	2.3	YMTDGMLLR	Oxidation@2;Oxidation@6	MDA_143_FTMSms2hcd	25.534	1	32.3	6.1e-05	2	90933.6	HUMAN	Pre-mRNA-splicing factor ATP-dependent RNA helicase DHX15
[58]	O43143	Oxidation	M	246	-	32	40	9.38	9e-17	602.288	2	0.76	EAMNDPLLER	Oxidation@3	MDA_143_FTMSms2hcd	26.017	1	40.1	6.3e-10	1	90933.6	HUMAN	Pre-mRNA-splicing factor ATP-dependent RNA helicase DHX15
[58]	O43143	Oxidation	M	273	-	32	40	9.38	9e-17	645.871	2	1.5	TLATDILMGVLK	Oxidation@8	MDA_143_FTMSms2hcd	49.363	1	44.9	4.4e-10	1	90933.6	HUMAN	Pre-mRNA-splicing factor ATP-dependent RNA helicase DHX15
[58]	O43143	Oxidation	M	291	-	32	40	9.38	9e-17	610.832	2	1.5	VIVMSATLDAGK	Oxidation@4	MDA_143_FTMSms2hcd	26.412	1	41.5	1.1e-08	1	90933.6	HUMAN	Pre-mRNA-splicing factor ATP-dependent RNA helicase DHX15
[58]	O43143	Oxidation	M	494	-	32	40	9.38	9e-17	813.379	2	1.8	TEMQDNTYPEILR	Oxidation@3	MDA_143_FTMSms2hcd	31.606	1	46.9	5.4e-11	1	90933.6	HUMAN	Pre-mRNA-splicing factor ATP-dependent RNA helicase DHX15
[58]	O43143	Oxidation	M	528	-	32	40	9.38	9e-17	673.082	4	2	KLGIDDLVHFDFMDPPAPETLMR	Oxidation@13;Oxidation@22	MDA_143_FTMSms2hcd	45.031	1	48.2	3e-10	1	90933.6	HUMAN	Pre-mRNA-splicing factor ATP-dependent RNA helicase DHX15
[58]	O43143	Oxidation	M	537	-	32	40	9.38	9e-17	673.082	4	2	KLGIDDLVHFDFMDPPAPETLMR	Oxidation@13;Oxidation@22	MDA_143_FTMSms2hcd	45.031	1	48.2	3e-10	1	90933.6	HUMAN	Pre-mRNA-splicing factor ATP-dependent RNA helicase DHX15
[58]	O43143	Oxidation	M	655	-	32	40	9.38	9e-17	504.743	2	0.65	SLMSADNVR	Oxidation@3	MDA_143_FTMSms2hcd	17.79	1	37.9	3.9e-06	1	90933.6	HUMAN	Pre-mRNA-splicing factor ATP-dependent RNA helicase DHX15
[58]	O43143	Oxidation	M	699	-	32	40	9.38	9e-17	584.304	3	1.3	ALVTGYFMQVAHLER	Oxidation@8	MDA_143_FTMSms2hcd	40.193	1	54.4	8.9e-12	1	90933.6	HUMAN	Pre-mRNA-splicing factor ATP-dependent RNA helicase DHX15
[58-1]	Q14562	Oxidation	M	661	-	2	2.8	3.42	3.8e-07	566.264	2	2.3	YMTDGMLLR	Oxidation@2;Oxidation@6	MDA_143_FTMSms2hcd	25.534	1	32.3	6.1e-05	2	139316	HUMAN	ATP-dependent RNA helicase DHX8
[58-1]	Q14562	Oxidation	M	665	-	2	2.8	3.42	3.8e-07	566.264	2	2.3	YMTDGMLLR	Oxidation@2;Oxidation@6	MDA_143_FTMSms2hcd	25.534	1	32.3	6.1e-05	2	139316	HUMAN	ATP-dependent RNA helicase DHX8
[58-1]	Q14562	Oxidation	M	820	-	2	2.8	3.42	3.8e-07	914.488	3	2.4	SLGPDVPELIILPVYSALPSEMQTR	Oxidation@22	MDA_143_FTMSms2hcd	55.291	1	31.7	3.8e-07	1	139316	HUMAN	ATP-dependent RNA helicase DHX8
[59]	Q8N1G4	Gln->pyro-Glu	Q	415	-	33	58.8	8.88	7.9e-16	677.853	2	1.9	QLQLEAEEQRK	Gln->pyro-Glu@1	MDA_143_FTMSms2hcd	28.487	1	38.5	1e-08	1	63473.5	HUMAN	Leucine-rich repeat-containing protein 47
[59]	Q8N1G4	Met-loss+Acetyl	M	1	-	33	58.8	8.88	7.9e-16	935.964	2	1.3	MAAAAVSESWPELELAER	Met-loss+Acetyl@1	MDA_143_FTMSms2hcd	48.215	1	60.6	2.7e-12	1	63473.5	HUMAN	Leucine-rich repeat-containing protein 47
[59]	Q8N1G4	Oxidation	M	344	-	33	58.8	8.88	7.9e-16	580.293	2	1.2	GMDLQPGNALK	Oxidation@2	MDA_143_FTMSms2hcd	24.415	1	35.5	1.5e-09	1	63473.5	HUMAN	Leucine-rich repeat-containing protein 47
[59]	Q8N1G4	Oxidation	M	496	-	33	58.8	8.88	7.9e-16	517.285	2	3	DVMDALILK	Oxidation@3	MDA_143_FTMSms2hcd	33.954	1	28	7.4e-07	1	63473.5	HUMAN	Leucine-rich repeat-containing protein 47
[59]	Q8N1G4	Oxidation	M	506	18	33	58.8	8.88	7.9e-16	541.937	3	-11	DVMDALILKMAEMK	Oxidation@13=18	MDA_143_FTMSms2hcd	19.265	1	16.1	0.0021	1	63473.5	HUMAN	Leucine-rich repeat-containing protein 47
[60]	O00410	Oxidation	M	358	-	28	28.5	9.74	2e-17	415.265	2	0.9	LVLPMIK	Oxidation@5	MDA_143_FTMSms2hcd	35.38	1	25.9	0.00011	1	123631	HUMAN	Importin-5
[60]	O00410	Oxidation	M	450	-	28	28.5	9.74	2e-17	901.958	2	1.6	VIAALLQTMEDQGNQR	Oxidation@9	MDA_143_FTMSms2hcd	32.994	1	58	1.2e-15	1	123631	HUMAN	Importin-5
[60]	O00410	Oxidation	M	493	-	28	28.5	9.74	2e-17	365.211	3	0.63	HLHSIMVLK	Oxidation@6	MDA_143_FTMSms2hcd	22.631	1	28.1	4.1e-06	1	123631	HUMAN	Importin-5
[60]	O00410	Oxidation	M	535	-	28	28.5	9.74	2e-17	818.413	2	3.1	FVPYYDLFMPSLK	Oxidation@9	MDA_143_FTMSms2hcd	47.529	1	51	1.6e-12	2	123631	HUMAN	Importin-5
[60]	O00410	Oxidation	M	574	-	28	28.5	9.74	2e-17	835.911	2	1.6	FMQDASDVMQLLLK	Oxidation@2;Oxidation@9	MDA_143_FTMSms2hcd	39.871	1	45.9	2.3e-08	1	123631	HUMAN	Importin-5
[60]	O00410	Oxidation	M	581	-	28	28.5	9.74	2e-17	835.911	2	1.6	FMQDASDVMQLLLK	Oxidation@2;Oxidation@9	MDA_143_FTMSms2hcd	39.871	1	45.9	2.3e-08	1	123631	HUMAN	Importin-5
[60]	O00410	Oxidation	M	627	-	28	28.5	9.74	2e-17	604.642	3	2.9	EFQQYLPVVMGPLMK	Oxidation@10;Oxidation@14	MDA_143_FTMSms2hcd	41.645	1	47.4	7.7e-12	1	123631	HUMAN	Importin-5
[60]	O00410	Oxidation	M	631	-	28	28.5	9.74	2e-17	604.642	3	2.9	EFQQYLPVVMGPLMK	Oxidation@10;Oxidation@14	MDA_143_FTMSms2hcd	41.645	1	47.4	7.7e-12	1	123631	HUMAN	Importin-5
[60]	O00410	Oxidation	M	707	-	28	28.5	9.74	2e-17	415.264	2	-1.5	LMVPLLK	Oxidation@2	MDA_143_FTMSms2hcd	36.554	1	29.9	1.2e-05	2	123631	HUMAN	Importin-5
[60]	O00410	Oxidation	M	770	-	28	28.5	9.74	2e-17	721.681	3	0.89	AIGTEPDSDVLSEIMHSFAK	Oxidation@15	MDA_143_FTMSms2hcd	44.729	1	52.9	1.2e-11	1	123631	HUMAN	Importin-5
[60]	O00410	Oxidation	M	1047	-	28	28.5	9.74	2e-17	568.629	3	2.5	IFSIIAEGEMHEAIK	Oxidation@10	MDA_143_FTMSms2hcd	36.003	1	45	8.2e-10	1	123631	HUMAN	Importin-5
[60-1]	O60518	Oxidation	M	543	-	7	4.2	7.09	1.6e-12	818.413	2	3.1	FVPYYDIFMPSLK	Oxidation@9	MDA_143_FTMSms2hcd	47.529	1	51	1.6e-12	2	124715	HUMAN	Ran-binding protein 6
[60-1]	O60518	Oxidation	M	715	-	7	4.2	7.09	1.6e-12	415.264	2	-1.5	LMVPLLK	Oxidation@2	MDA_143_FTMSms2hcd	36.554	1	29.9	1.2e-05	2	124715	HUMAN	Ran-binding protein 6
[61]	P46940	Oxidation	M	31	-	27	26.7	8.45	4.9e-15	555.243	2	0.54	LTAEEMDER	Oxidation@6	MDA_143_FTMSms2hcd	15.595	1	41	6.8e-13	1	189254	HUMAN	Ras GTPase-activating-like protein IQGAP1
[61]	P46940	Oxidation	M	123	-	27	26.7	8.45	4.9e-15	737.37	3	1.9	HTDNVIQWLNAMDEIGLPK	Oxidation@12	MDA_143_FTMSms2hcd	45.169	1	32.4	2.8e-09	1	189254	HUMAN	Ras GTPase-activating-like protein IQGAP1
[61]	P46940	Oxidation	M	412	-	27	26.7	8.45	4.9e-15	965.494	3	1.1	TVLELMNPEAQLPQVYPFAADLYQK	Oxidation@6	MDA_143_FTMSms2hcd	50.435	1	55.4	1.2e-10	1	189254	HUMAN	Ras GTPase-activating-like protein IQGAP1
[61]	P46940	Oxidation	M	866	-	27	26.7	8.45	4.9e-15	785.42	2	1.7	TLINAEDPPMVVVR	Oxidation@10	MDA_143_FTMSms2hcd	35.086	1	31.6	3.7e-08	1	189254	HUMAN	Ras GTPase-activating-like protein IQGAP1
[61]	P46940	Oxidation	M	890	-	27	26.7	8.45	4.9e-15	822.723	3	2.4	FVHLLDQSDQDFQEELDLMK	Oxidation@19	MDA_143_FTMSms2hcd	41.307	1	53	4.9e-15	1	189254	HUMAN	Ras GTPase-activating-like protein IQGAP1
[61]	P46940	Oxidation	M	913	-	27	26.7	8.45	4.9e-15	895.935	2	2	SNQQLENDLNLMDIK	Oxidation@12	MDA_143_FTMSms2hcd	35.754	1	59.3	9.7e-13	1	189254	HUMAN	Ras GTPase-activating-like protein IQGAP1
[61]	P46940	Oxidation	M	1002	-	27	26.7	8.45	4.9e-15	695.663	3	0.64	FMDSVIFTLYNYASNQR	Oxidation@2	MDA_143_FTMSms2hcd	49.005	1	32.2	8.4e-06	1	189254	HUMAN	Ras GTPase-activating-like protein IQGAP1
[61]	P46940	Oxidation	M	1160	-	27	26.7	8.45	4.9e-15	633.674	3	2.4	FLSAIVSSVDKIPYGMR	Oxidation@16	MDA_143_FTMSms2hcd	41.778	1	54.2	8.9e-12	1	189254	HUMAN	Ras GTPase-activating-like protein IQGAP1
[61]	P46940	Oxidation	M	1240	-	27	26.7	8.45	4.9e-15	863.091	3	3.1	MFLGDNAHLSIINEYLSQSYQK	Oxidation@1	MDA_143_FTMSms2hcd	44.677	1	53.9	2.5e-10	1	189254	HUMAN	Ras GTPase-activating-like protein IQGAP1
[61]	P46940	Phospho	Y	759	-	27	26.7	8.45	4.9e-15	677.998	3	-13	LQARCRGYLVRQEFR	Phospho@8	MDA_143_FTMSms2hcd	26.373	1	18.1	0.0049	1	189254	HUMAN	Ras GTPase-activating-like protein IQGAP1
[62]	P19338	Oxidation	M	630	-	30	35.8	9.27	1.5e-16	662.273	2	0.62	EAMEDGEIDGNK	Oxidation@3	MDA_143_FTMSms2hcd	15.936	1	43.5	2.3e-11	1	76615	HUMAN	Nucleolin
[63]	P29401	Oxidation	M	1	9	29	49.4	8.72	1.5e-15	724.827	2	0.047	MESYHKPDQQK	Acetyl@N-term=9;Oxidation@1=9	MDA_143_FTMSms2hcd	14.573	1	51.5	7.1e-13	1	67878.2	HUMAN	Transketolase
[63]	P29401	Oxidation	M	199	-	29	49.4	8.72	1.5e-15	695.675	3	1.2	LGQSDPAPLQHQMDIYQK	Oxidation@13	MDA_143_FTMSms2hcd	26.458	1	61.5	1.5e-14	1	67878.2	HUMAN	Transketolase
[63]	P29401	Oxidation	M	266	-	29	49.4	8.72	1.5e-15	1020.01	2	3.9	NMAEQIIQEIYSQIQSK	Oxidation@2	MDA_143_FTMSms2hcd	52.994	1	62.2	1.2e-14	1	67878.2	HUMAN	Transketolase
[63]	P29401	Oxidation	M	303	-	29	49.4	8.72	1.5e-15	469.737	2	2.3	MPSLPSYK	Oxidation@1	MDA_143_FTMSms2hcd	25.474	1	27.6	2.2e-06	1	67878.2	HUMAN	Transketolase
[63]	P29401	Oxidation	M	604	-	29	49.4	8.72	1.5e-15	377.681	2	-0.41	MFGIDR	Oxidation@1	MDA_143_FTMSms2hcd	23.507	1	20.5	0.00076	1	67878.2	HUMAN	Transketolase
[64]	P13798	Gln->pyro-Glu	Q	66	-	28	45.2	9.45	7e-17	1274.61	2	2.1	QYLVFHDGDSVVFAGPAGNSVETR	Gln->pyro-Glu@1	MDA_143_FTMSms2hcd	44.905	1	74.5	5.3e-15	1	81225.3	HUMAN	Acylamino-acid-releasing enzyme
[64]	P13798	Oxidation	M	216	-	28	45.2	9.45	7e-17	1033.95	2	2.4	GDQFVFYEDWGENMVSK	Oxidation@14	MDA_143_FTMSms2hcd	41.769	1	57.5	4e-16	1	81225.3	HUMAN	Acylamino-acid-releasing enzyme
[64]	P13798	Oxidation	M	420	-	28	45.2	9.45	7e-17	1272.69	2	3.1	LLTIDQDLMVAQFSTPSLPPTLK	Oxidation@9	MDA_143_FTMSms2hcd	49.381	1	57.7	1.3e-12	1	81225.3	HUMAN	Acylamino-acid-releasing enzyme
[64]	P13798	Oxidation	M	528	-	28	45.2	9.45	7e-17	649.852	2	2.7	MGFAVLLVNYR	Oxidation@1	MDA_143_FTMSms2hcd	43.437	1	48.6	1.3e-13	1	81225.3	HUMAN	Acylamino-acid-releasing enzyme
[64]	P13798	Oxidation	M	670	-	28	45.2	9.45	7e-17	701.375	2	1.9	TPLLLMLGQEDR	Oxidation@6	MDA_143_FTMSms2hcd	40.263	2	47.2	2e-11	1	81225.3	HUMAN	Acylamino-acid-releasing enzyme
[64]	P13798	Oxidation	M	684	-	28	45.2	9.45	7e-17	481.707	2	2.2	QGMEYYR	Oxidation@3	MDA_143_FTMSms2hcd	16.754	1	30.3	5.8e-08	1	81225.3	HUMAN	Acylamino-acid-releasing enzyme
[64]	P13798	Oxidation	M	720	-	28	45.2	9.45	7e-17	879.43	3	3.2	STHALSEVEVESDSFMNAVLWLR	Oxidation@16	MDA_143_FTMSms2hcd	47.579	1	64.4	7e-17	1	81225.3	HUMAN	Acylamino-acid-releasing enzyme
[65]	P13645	Oxidation	M	150	-	27	45.4	9.46	6.6e-17	553.767	2	0.22	VTMQNLNDR	Oxidation@3	MDA_143_FTMSms2hcd	16.001	1	41.6	3.2e-06	3	58827.5	HUMAN	Keratin, type I cytoskeletal 10
[65]	P13645	Oxidation	M	271	-	27	45.4	9.46	6.6e-17	1056.53	2	2.3	ADLEMQIESLTEELAYLK	Oxidation@5	MDA_143_FTMSms2hcd	57.997	1	53.5	4.1e-13	1	58827.5	HUMAN	Keratin, type I cytoskeletal 10
[65]	P13645	Oxidation	M	291	-	27	45.4	9.46	6.6e-17	439.535	3	0.16	NHEEEMKDLR	Oxidation@6	MDA_143_FTMSms2hcd	12.615	1	24.4	3.3e-06	1	58827.5	HUMAN	Keratin, type I cytoskeletal 10
[65]	P13645	Oxidation	M	306	-	27	45.4	9.46	6.6e-17	968.803	3	3.8	NVSTGDVNVEMNAAPGVDLTQLLNNMR	Oxidation@11;Oxidation@26	MDA_143_FTMSms2hcd	44.57	1	66.7	6.6e-17	1	58827.5	HUMAN	Keratin, type I cytoskeletal 10
[65]	P13645	Oxidation	M	321	-	27	45.4	9.46	6.6e-17	968.803	3	3.8	NVSTGDVNVEMNAAPGVDLTQLLNNMR	Oxidation@11;Oxidation@26	MDA_143_FTMSms2hcd	44.57	1	66.7	6.6e-17	1	58827.5	HUMAN	Keratin, type I cytoskeletal 10
[65-1]	P35527	Oxidation	M	157	-	11	24.7	9.75	1.9e-17	541.251	2	0.25	STMQELNSR	Oxidation@3	MDA_143_FTMSms2hcd	14.858	1	35.2	1.3e-09	1	62064.8	HUMAN	Keratin, type I cytoskeletal 9
[65-1]	P35527	Oxidation	M	276	-	11	24.7	9.75	1.9e-17	1102.01	2	2.2	SDLEMQYETLQEELMALK	Oxidation@5;Oxidation@15	MDA_143_FTMSms2hcd	49.222	1	53	1.1e-14	1	62064.8	HUMAN	Keratin, type I cytoskeletal 9
[65-1]	P35527	Oxidation	M	286	-	11	24.7	9.75	1.9e-17	1102.01	2	2.2	SDLEMQYETLQEELMALK	Oxidation@5;Oxidation@15	MDA_143_FTMSms2hcd	49.222	1	53	1.1e-14	1	62064.8	HUMAN	Keratin, type I cytoskeletal 9
[65-2]	P02533	Oxidation	M	119	-	6	17.2	3.69	3.2e-06	553.767	2	0.22	VTMQNLNDR	Oxidation@3	MDA_143_FTMSms2hcd	16.001	1	41.6	3.2e-06	3	51561.9	HUMAN	Keratin, type I cytoskeletal 14
[65-2]	P02533	Oxidation	M	351	39	6	17.2	3.69	3.2e-06	798.379	4	0.84	TMQNLEIELQSQLSMKASLENSLEETK	Oxidation@15=39;Phospho@11|14|18|22|26	MDA_143_FTMSms2hcd	40.397	1	15.1	0.0035	1	51561.9	HUMAN	Keratin, type I cytoskeletal 14
[65-3]	P08779	Oxidation	M	121	-	5	12.1	3.69	3.2e-06	553.767	2	0.22	VTMQNLNDR	Oxidation@3	MDA_143_FTMSms2hcd	16.001	1	41.6	3.2e-06	3	51268.3	HUMAN	Keratin, type I cytoskeletal 16
[65-4]	P05783	Oxidation	M	213	-	2	5.8	8.74	1.4e-15	731.73	3	1.8	LQLETEIEALKEELLFMK	Oxidation@17	MDA_143_FTMSms2hcd	52.502	1	61	1.4e-15	1	48058.2	HUMAN	Keratin, type I cytoskeletal 18
[66]	Q13618	Oxidation	M	23	-	30	42.4	8.71	1.6e-15	551.234	2	1.6	AFPMTMDEK	Oxidation@4;Oxidation@6	MDA_143_FTMSms2hcd	19.687	1	24.4	1.5e-06	1	88931	HUMAN	Cullin-3
[66]	Q13618	Oxidation	M	25	-	30	42.4	8.71	1.6e-15	551.234	2	1.6	AFPMTMDEK	Oxidation@4;Oxidation@6	MDA_143_FTMSms2hcd	19.687	1	24.4	1.5e-06	1	88931	HUMAN	Cullin-3
[66]	Q13618	Oxidation	M	279	-	30	42.4	8.71	1.6e-15	578.292	3	1.1	TIVEMENSGLVHMLK	Oxidation@5;Oxidation@13	MDA_143_FTMSms2hcd	29.009	1	53.3	8.4e-15	1	88931	HUMAN	Cullin-3
[66]	Q13618	Oxidation	M	287	-	30	42.4	8.71	1.6e-15	578.292	3	1.1	TIVEMENSGLVHMLK	Oxidation@5;Oxidation@13	MDA_143_FTMSms2hcd	29.009	1	53.3	8.4e-15	1	88931	HUMAN	Cullin-3
[66]	Q13618	Oxidation	M	416	-	30	42.4	8.71	1.6e-15	376.71	2	0.22	AMVLFR	Oxidation@2	MDA_143_FTMSms2hcd	26.439	1	24.1	1.8e-05	1	88931	HUMAN	Cullin-3
[66]	Q13618	Oxidation	M	454	-	30	42.4	8.71	1.6e-15	728.335	2	0.25	SVSDDSEKNMISK	Oxidation@10	MDA_143_FTMSms2hcd	15.316	1	64.9	5.1e-13	1	88931	HUMAN	Cullin-3
[66]	Q13618	Oxidation	M	473	-	30	42.4	8.71	1.6e-15	384.689	2	0.57	LEGMFR	Oxidation@4	MDA_143_FTMSms2hcd	20.008	1	18.8	5.3e-05	1	88931	HUMAN	Cullin-3
[66]	Q13618	Oxidation	M	477	-	30	42.4	8.71	1.6e-15	789.825	2	1.6	DMSISNTTMDEFR	Oxidation@2;Oxidation@9	MDA_143_FTMSms2hcd	25.942	1	50.4	3.1e-15	1	88931	HUMAN	Cullin-3
[66]	Q13618	Oxidation	M	484	-	30	42.4	8.71	1.6e-15	789.825	2	1.6	DMSISNTTMDEFR	Oxidation@2;Oxidation@9	MDA_143_FTMSms2hcd	25.942	1	50.4	3.1e-15	1	88931	HUMAN	Cullin-3
[66]	Q13618	Oxidation	M	599	-	30	42.4	8.71	1.6e-15	780.075	3	2.9	HILQVSTFQMTILMLFNNR	Oxidation@10;Oxidation@14	MDA_143_FTMSms2hcd	54.978	1	35.8	6.9e-09	1	88931	HUMAN	Cullin-3
[66]	Q13618	Oxidation	M	603	-	30	42.4	8.71	1.6e-15	780.075	3	2.9	HILQVSTFQMTILMLFNNR	Oxidation@10;Oxidation@14	MDA_143_FTMSms2hcd	54.978	1	35.8	6.9e-09	1	88931	HUMAN	Cullin-3
[67]	Q8TCG1	Oxidation	M	259	-	38	36.7	7.4	4.2e-13	727.403	2	0.58	KYSVDLLMDLLK	Oxidation@8	MDA_143_FTMSms2hcd	45.714	1	58.7	1.9e-10	1	102186	HUMAN	Protein CIP2A
[67]	Q8TCG1	Oxidation	M	496	-	38	36.7	7.4	4.2e-13	541.967	3	2.5	LKPLVPGMEVSFYK	Oxidation@8	MDA_143_FTMSms2hcd	35.478	1	45.4	2.6e-12	1	102186	HUMAN	Protein CIP2A
[67]	Q8TCG1	Oxidation	M	608	-	38	36.7	7.4	4.2e-13	439.244	2	0.18	LQSGMVVK	Oxidation@5	MDA_143_FTMSms2hcd	17.275	1	17.9	0.0026	1	102186	HUMAN	Protein CIP2A
[67]	Q8TCG1	Oxidation	M	623	-	38	36.7	7.4	4.2e-13	688.31	2	-0.041	ISDIMDVYEMK	Oxidation@5;Oxidation@10	MDA_143_FTMSms2hcd	28.771	1	47	4.2e-13	1	102186	HUMAN	Protein CIP2A
[67]	Q8TCG1	Oxidation	M	628	-	38	36.7	7.4	4.2e-13	688.31	2	-0.041	ISDIMDVYEMK	Oxidation@5;Oxidation@10	MDA_143_FTMSms2hcd	28.771	1	47	4.2e-13	1	102186	HUMAN	Protein CIP2A
[67]	Q8TCG1	Oxidation	M	678	-	38	36.7	7.4	4.2e-13	404.224	2	0.52	TLASMLR	Oxidation@5	MDA_143_FTMSms2hcd	22.576	1	30.1	2.1e-06	1	102186	HUMAN	Protein CIP2A
[67]	Q8TCG1	Oxidation	M	732	-	38	36.7	7.4	4.2e-13	528.264	2	1.2	SYMELLQR	Oxidation@3	MDA_143_FTMSms2hcd	27.802	1	39.8	5.4e-08	1	102186	HUMAN	Protein CIP2A
[67]	Q8TCG1	Oxidation	M	884	-	38	36.7	7.4	4.2e-13	410.202	4	-0.3	HSHMIAMIHSLSGGK	Oxidation@4;Oxidation@7	MDA_143_FTMSms2hcd	18.964	1	37.1	9.1e-11	1	102186	HUMAN	Protein CIP2A
[67]	Q8TCG1	Oxidation	M	887	-	38	36.7	7.4	4.2e-13	410.202	4	-0.3	HSHMIAMIHSLSGGK	Oxidation@4;Oxidation@7	MDA_143_FTMSms2hcd	18.964	1	37.1	9.1e-11	1	102186	HUMAN	Protein CIP2A
[68]	Q9Y263	Oxidation	M	166	-	29	38.6	8.68	1.8e-15	794.917	2	1.3	ILPEQGLMLTGSADK	Oxidation@8	MDA_143_FTMSms2hcd	33.957	1	59	4.4e-11	1	87157.9	HUMAN	Phospholipase A-2-activating protein
[68]	Q9Y263	Oxidation	M	442	-	29	38.6	8.68	1.8e-15	760.875	2	0.24	NDLNPMFLDQVAK	Oxidation@6	MDA_143_FTMSms2hcd	37.585	1	49.1	5.7e-09	1	87157.9	HUMAN	Phospholipase A-2-activating protein
[68]	Q9Y263	Oxidation	M	684	-	29	38.6	8.68	1.8e-15	425.22	3	0.77	ESLMSHAIELK	Oxidation@4	MDA_143_FTMSms2hcd	25.587	1	32	1.8e-07	1	87157.9	HUMAN	Phospholipase A-2-activating protein
[69]	P14314	Oxidation	M	130	-	31	43.4	8.74	1.4e-15	796.89	2	1.4	ERESLQQMAEVTR	Oxidation@8	MDA_143_FTMSms2hcd	20.852	1	28.5	5.7e-07	1	59425.9	HUMAN	Glucosidase 2 subunit beta
[69]	P14314	Oxidation	M	175	-	31	43.4	8.74	1.4e-15	455.235	3	0.7	KSLEDQVEMLR	Oxidation@9	MDA_143_FTMSms2hcd	28.49	1	24.2	6.8e-06	1	59425.9	HUMAN	Glucosidase 2 subunit beta
[69]	P14314	Oxidation	M	225	-	31	43.4	8.74	1.4e-15	1391.12	4	3.6	ELDDDMDGTVSVTELQTHPELDTDGDGALSEAEAQALLSGDTQTDATSFYDR	Oxidation@6	MDA_143_FTMSms2hcd	46.272	1	63.9	1.4e-15	1	59425.9	HUMAN	Glucosidase 2 subunit beta
[69]	P14314	Oxidation	M	356	-	31	43.4	8.74	1.4e-15	1099	2	2.5	MPPYDEQTQAFIDAAQEAR	Oxidation@1	MDA_143_FTMSms2hcd	38.521	1	70.8	7e-13	1	59425.9	HUMAN	Glucosidase 2 subunit beta
[69]	P14314	Oxidation	M	387	-	31	43.4	8.74	1.4e-15	612.301	2	1.2	SLKDMEESIR	Oxidation@5	MDA_143_FTMSms2hcd	19.682	1	50	1.9e-09	1	59425.9	HUMAN	Glucosidase 2 subunit beta
[69]	P14314	Oxidation	M	463	-	31	43.4	8.74	1.4e-15	687.834	4	2.5	LGGSPTSLGTWGSWIGPDHDKFSAMK	Oxidation@25	MDA_143_FTMSms2hcd	40.285	1	63.1	4.5e-14	1	59425.9	HUMAN	Glucosidase 2 subunit beta
[69]	P14314	Oxidation	M	490	-	31	43.4	8.74	1.4e-15	677.812	2	0.77	ETMVTSTTEPSR	Oxidation@3	MDA_143_FTMSms2hcd	17.139	1	39	1.2e-10	1	59425.9	HUMAN	Glucosidase 2 subunit beta
[70]	Q96JB2	Met-loss+Acetyl	M	1	-	27	36.4	8.48	4.2e-15	790.44	2	2.1	MAEAALLLLPEAAAER	Met-loss+Acetyl@1	MDA_143_FTMSms2hcd	55.797	1	51.1	6.6e-13	1	94096.7	HUMAN	Conserved oligomeric Golgi complex subunit 3
[70]	Q96JB2	Oxidation	M	97	-	27	36.4	8.48	4.2e-15	636.283	2	1.6	GFTSLGMEEER	Oxidation@7	MDA_143_FTMSms2hcd	25.603	1	45	2.4e-13	1	94096.7	HUMAN	Conserved oligomeric Golgi complex subunit 3
[70]	Q96JB2	Oxidation	M	119	-	27	36.4	8.48	4.2e-15	705.314	2	0.3	LQTQMDQDEGTK	Oxidation@5	MDA_143_FTMSms2hcd	14.343	1	50.5	3.3e-12	1	94096.7	HUMAN	Conserved oligomeric Golgi complex subunit 3
[70]	Q96JB2	Oxidation	M	225	-	27	36.4	8.48	4.2e-15	1010.53	2	3.1	LNSPTLSVNSDGFIPMLAK	Oxidation@16	MDA_143_FTMSms2hcd	43.576	1	65.2	8.4e-14	1	94096.7	HUMAN	Conserved oligomeric Golgi complex subunit 3
[70]	Q96JB2	Oxidation	M	494	-	27	36.4	8.48	4.2e-15	641.658	3	1.1	LVMMEQIAQSLKDEQK	Oxidation@3;Oxidation@4	MDA_143_FTMSms2hcd	28.272	1	37.1	4.5e-09	1	94096.7	HUMAN	Conserved oligomeric Golgi complex subunit 3
[70]	Q96JB2	Oxidation	M	495	-	27	36.4	8.48	4.2e-15	641.658	3	1.1	LVMMEQIAQSLKDEQK	Oxidation@3;Oxidation@4	MDA_143_FTMSms2hcd	28.272	1	37.1	4.5e-09	1	94096.7	HUMAN	Conserved oligomeric Golgi complex subunit 3
[70]	Q96JB2	Oxidation	M	653	-	27	36.4	8.48	4.2e-15	528.798	2	0.85	ILNPMTVPR	Oxidation@5	MDA_143_FTMSms2hcd	26.351	1	37.2	7.7e-07	1	94096.7	HUMAN	Conserved oligomeric Golgi complex subunit 3
[70]	Q96JB2	Oxidation	M	768	-	27	36.4	8.48	4.2e-15	529.763	2	0.62	SMSLYLSNK	Oxidation@2	MDA_143_FTMSms2hcd	23.674	1	29.5	2.9e-08	1	94096.7	HUMAN	Conserved oligomeric Golgi complex subunit 3
[71]	Q05086	Oxidation	M	339	-	29	31.9	8.67	1.9e-15	782.874	2	1.6	MMETFQQLITYK	Oxidation@1;Oxidation@2	MDA_143_FTMSms2hcd	37.746	1	40	2.2e-10	1	100688	HUMAN	Ubiquitin-protein ligase E3A
[71]	Q05086	Oxidation	M	340	-	29	31.9	8.67	1.9e-15	782.874	2	1.6	MMETFQQLITYK	Oxidation@1;Oxidation@2	MDA_143_FTMSms2hcd	37.746	1	40	2.2e-10	1	100688	HUMAN	Ubiquitin-protein ligase E3A
[71]	Q05086	Oxidation	M	542	-	29	31.9	8.67	1.9e-15	545.61	3	0.7	LEMIAMENPADLKK	Oxidation@3;Oxidation@6	MDA_143_FTMSms2hcd	25.694	1	52.9	3.3e-12	1	100688	HUMAN	Ubiquitin-protein ligase E3A
[71]	Q05086	Oxidation	M	545	-	29	31.9	8.67	1.9e-15	545.61	3	0.7	LEMIAMENPADLKK	Oxidation@3;Oxidation@6	MDA_143_FTMSms2hcd	25.694	1	52.9	3.3e-12	1	100688	HUMAN	Ubiquitin-protein ligase E3A
[71]	Q05086	Oxidation	M	739	-	29	31.9	8.67	1.9e-15	511.261	3	0.7	RGFHMVTNESPLK	Oxidation@5	MDA_143_FTMSms2hcd	22.389	1	34.6	1.3e-08	1	100688	HUMAN	Ubiquitin-protein ligase E3A
[72]	Q9UBC2	Acetyl	K	694	26	27	39.5	7.76	9.2e-14	650.565	4	-1.9	KQTKNDPFTSDPFTKNPSLPSK	Acetyl@15=26;Phospho@10|14	MDA_143_FTMSms2hcd	22.843	1	17.5	0.0042	1	94255.8	HUMAN	Epidermal growth factor receptor substrate 15-like 1
[72]	Q9UBC2	Met-loss+Acetyl	M	1	-	27	39.5	7.76	9.2e-14	865.784	3	1.1	MAAPLIPLSQQIPTGNSLYESYYK	Met-loss+Acetyl@1	MDA_143_FTMSms2hcd	51.31	1	44.4	2e-10	1	94255.8	HUMAN	Epidermal growth factor receptor substrate 15-like 1
[72]	Q9UBC2	Oxidation	M	155	-	27	39.5	7.76	9.2e-14	344.536	3	0.45	VKPVLMNSK	Oxidation@6	MDA_143_FTMSms2hcd	16.383	1	30.6	1.5e-06	1	94255.8	HUMAN	Epidermal growth factor receptor substrate 15-like 1
[72]	Q9UBC2	Oxidation	M	337	-	27	39.5	7.76	9.2e-14	809.902	2	2.3	DQFALAMYFIQQK	Oxidation@7	MDA_143_FTMSms2hcd	46.154	1	49.1	1.9e-12	1	94255.8	HUMAN	Epidermal growth factor receptor substrate 15-like 1
[72]	Q9UBC2	Oxidation	M	452	-	27	39.5	7.76	9.2e-14	579.257	3	1.1	QDAQDRLDEMDQQK	Oxidation@10	MDA_143_FTMSms2hcd	16.862	1	49.9	4e-12	1	94255.8	HUMAN	Epidermal growth factor receptor substrate 15-like 1
[72]	Q9UBC2	Phospho	S	229	17	27	39.5	7.76	9.2e-14	742.398	3	2.5	TVFPGAVPVLPASPPPKDSLR	Phospho@13=17	MDA_143_FTMSms2hcd	42.191	1	62	1.1e-12	1	94255.8	HUMAN	Epidermal growth factor receptor substrate 15-like 1
[72]	Q9UBC2	Phospho	S	255	17	27	39.5	7.76	9.2e-14	670.645	3	1.7	STPSHGSVSSLNSTGSLSPK	Phospho@18=17	MDA_143_FTMSms2hcd	24.836	1	47.9	6.8e-13	1	94255.8	HUMAN	Epidermal growth factor receptor substrate 15-like 1
[73]	P04264	Oxidation	M	259	-	29	34.8	7.17	1.1e-12	666.764	2	1.5	NMQDMVEDYR	Oxidation@2;Oxidation@5	MDA_143_FTMSms2hcd	20.279	1	32.9	7.1e-12	1	66039.2	HUMAN	Keratin, type II cytoskeletal 1
[73]	P04264	Oxidation	M	262	-	29	34.8	7.17	1.1e-12	666.764	2	1.5	NMQDMVEDYR	Oxidation@2;Oxidation@5	MDA_143_FTMSms2hcd	20.279	1	32.9	7.1e-12	1	66039.2	HUMAN	Keratin, type II cytoskeletal 1
[73]	P04264	Oxidation	M	296	-	29	34.8	7.17	1.1e-12	508.224	2	0.63	DVDGAYMTK	Oxidation@7	MDA_143_FTMSms2hcd	16.923	1	35.1	9.3e-12	1	66039.2	HUMAN	Keratin, type II cytoskeletal 1
[73-1]	P35908	Oxidation	M	257	-	26	53.2	9.16	2.4e-16	758.019	3	1.2	TSQNSELNNMQDLVEDYKK	Oxidation@10	MDA_143_FTMSms2hcd	26.949	1	39.5	9.1e-12	1	65433.4	HUMAN	Keratin, type II cytoskeletal 2 epidermal
[73-1]	P35908	Oxidation	M	294	-	26	53.2	9.16	2.4e-16	542.753	2	0.54	DVDNAYMIK	Oxidation@7	MDA_143_FTMSms2hcd	24.09	1	38.5	2e-11	1	65433.4	HUMAN	Keratin, type II cytoskeletal 2 epidermal
[73-1]	P35908	Oxidation	M	337	-	26	53.2	9.16	2.4e-16	1022.17	3	-0.5	VLYDAEISQIHQSVTDTNVILSMDNSR	Oxidation@23	MDA_143_FTMSms2hcd	41.179	1	72.5	2.4e-16	1	65433.4	HUMAN	Keratin, type II cytoskeletal 2 epidermal
[73-2]	P04259	Oxidation	M	279	-	12	22.9	4.77	3.2e-08	795.636	4	7.5	DVDAAYMNKVELQAKADTLTDEINFLR	Oxidation@7;Phospho@6|18	MDA_143_FTMSms2hcd	46.953	1	17.8	0.0014	3	60067.4	HUMAN	Keratin, type II cytoskeletal 6B
[73-3]	P48668	Oxidation	M	279	-	11	21.1	4.19	3.8e-07	795.636	4	7.5	DVDAAYMNKVELQAKADTLTDEINFLR	Oxidation@7;Phospho@6|18	MDA_143_FTMSms2hcd	46.953	1	17.8	0.0014	3	60025.4	HUMAN	Keratin, type II cytoskeletal 6C
[73-4]	P02538	Oxidation	M	279	-	10	16.8	4.19	3.8e-07	795.636	4	7.5	DVDAAYMNKVELQAKADTLTDEINFLR	Oxidation@7;Phospho@6|18	MDA_143_FTMSms2hcd	46.953	1	17.8	0.0014	3	60045.4	HUMAN	Keratin, type II cytoskeletal 6A
[74]	P52272	Met-loss+Acetyl	M	1	-	29	44.4	9.04	3.9e-16	771.907	2	3.2	MAAGVEAAAEVAATEIK	Met-loss+Acetyl@1	MDA_143_FTMSms2hcd	48.303	1	54.1	5e-12	1	77516.4	HUMAN	Heterogeneous nuclear ribonucleoprotein M
[74]	P52272	Oxidation	M	105	-	29	44.4	9.04	3.9e-16	884.938	2	1	VGEVTYVELLMDAEGK	Oxidation@11	MDA_143_FTMSms2hcd	45.056	1	37.9	1.2e-09	1	77516.4	HUMAN	Heterogeneous nuclear ribonucleoprotein M
[74]	P52272	Oxidation	M	226	-	29	44.4	9.04	3.9e-16	484.274	3	8.3e-05	LKEVFSMAGVVVR	Oxidation@7	MDA_143_FTMSms2hcd	31.465	1	16.4	7.3e-05	1	77516.4	HUMAN	Heterogeneous nuclear ribonucleoprotein M
[74]	P52272	Oxidation	M	263	-	29	44.4	9.04	3.9e-16	924.722	4	2.6	GIGTVTFEQSIEAVQAISMFNGQLLFDRPMHVK	Oxidation@19;Oxidation@30	MDA_143_FTMSms2hcd	54.87	1	32.9	2.6e-09	1	77516.4	HUMAN	Heterogeneous nuclear ribonucleoprotein M
[74]	P52272	Oxidation	M	274	-	29	44.4	9.04	3.9e-16	924.722	4	2.6	GIGTVTFEQSIEAVQAISMFNGQLLFDRPMHVK	Oxidation@19;Oxidation@30	MDA_143_FTMSms2hcd	54.87	1	32.9	2.6e-09	1	77516.4	HUMAN	Heterogeneous nuclear ribonucleoprotein M
[74]	P52272	Oxidation	M	367	-	29	44.4	9.04	3.9e-16	494.702	2	-1	FGSGMNMGR	Oxidation@5;Oxidation@7	MDA_143_FTMSms2hcd	14.019	1	42.3	2.8e-11	1	77516.4	HUMAN	Heterogeneous nuclear ribonucleoprotein M
[74]	P52272	Oxidation	M	369	-	29	44.4	9.04	3.9e-16	494.702	2	-1	FGSGMNMGR	Oxidation@5;Oxidation@7	MDA_143_FTMSms2hcd	14.019	1	42.3	2.8e-11	1	77516.4	HUMAN	Heterogeneous nuclear ribonucleoprotein M
[74]	P52272	Oxidation	M	419	-	29	44.4	9.04	3.9e-16	378.499	3	-0.96	MGAGLGHGMDR	Oxidation@1;Oxidation@9	MDA_143_FTMSms2hcd	13.614	1	29.1	1.5e-08	1	77516.4	HUMAN	Heterogeneous nuclear ribonucleoprotein M
[74]	P52272	Oxidation	M	427	-	29	44.4	9.04	3.9e-16	378.499	3	-0.96	MGAGLGHGMDR	Oxidation@1;Oxidation@9	MDA_143_FTMSms2hcd	13.614	1	29.1	1.5e-08	1	77516.4	HUMAN	Heterogeneous nuclear ribonucleoprotein M
[74]	P52272	Oxidation	M	437	-	29	44.4	9.04	3.9e-16	427.2	2	1.3	MGLVMDR	Oxidation@1;Oxidation@5	MDA_143_FTMSms2hcd	17.517	1	30.9	8.9e-09	1	77516.4	HUMAN	Heterogeneous nuclear ribonucleoprotein M
[74]	P52272	Oxidation	M	441	-	29	44.4	9.04	3.9e-16	427.2	2	1.3	MGLVMDR	Oxidation@1;Oxidation@5	MDA_143_FTMSms2hcd	17.517	1	30.9	8.9e-09	1	77516.4	HUMAN	Heterogeneous nuclear ribonucleoprotein M
[74]	P52272	Oxidation	M	457	-	29	44.4	9.04	3.9e-16	549.261	3	0.73	MGPLGLDHMASSIER	Oxidation@1;Oxidation@9	MDA_143_FTMSms2hcd	27.013	1	53.9	6.2e-13	1	77516.4	HUMAN	Heterogeneous nuclear ribonucleoprotein M
[74]	P52272	Oxidation	M	465	-	29	44.4	9.04	3.9e-16	549.261	3	0.73	MGPLGLDHMASSIER	Oxidation@1;Oxidation@9	MDA_143_FTMSms2hcd	27.013	1	53.9	6.2e-13	1	77516.4	HUMAN	Heterogeneous nuclear ribonucleoprotein M
[74]	P52272	Oxidation	M	497	-	29	44.4	9.04	3.9e-16	395.2	2	0.47	MAAPIDR	Oxidation@1	MDA_143_FTMSms2hcd	16.404	1	23.9	1.4e-06	1	77516.4	HUMAN	Heterogeneous nuclear ribonucleoprotein M
[74]	P52272	Oxidation	M	518	-	29	44.4	9.04	3.9e-16	395.2	2	-0.29	MGPAIER	Oxidation@1	MDA_143_FTMSms2hcd	17.211	1	22.7	0.00057	1	77516.4	HUMAN	Heterogeneous nuclear ribonucleoprotein M
[74]	P52272	Oxidation	M	525	-	29	44.4	9.04	3.9e-16	428.189	2	0.028	MGLSMER	Oxidation@1;Oxidation@5	MDA_143_FTMSms2hcd	14.782	1	30.6	9.9e-08	1	77516.4	HUMAN	Heterogeneous nuclear ribonucleoprotein M
[74]	P52272	Oxidation	M	529	-	29	44.4	9.04	3.9e-16	428.189	2	0.028	MGLSMER	Oxidation@1;Oxidation@5	MDA_143_FTMSms2hcd	14.782	1	30.6	9.9e-08	1	77516.4	HUMAN	Heterogeneous nuclear ribonucleoprotein M
[74]	P52272	Oxidation	M	532	-	29	44.4	9.04	3.9e-16	610.793	2	1.9	MVPAGMGAGLER	Oxidation@1;Oxidation@6	MDA_143_FTMSms2hcd	21.537	1	44.8	2.3e-10	1	77516.4	HUMAN	Heterogeneous nuclear ribonucleoprotein M
[74]	P52272	Oxidation	M	537	-	29	44.4	9.04	3.9e-16	610.793	2	1.9	MVPAGMGAGLER	Oxidation@1;Oxidation@6	MDA_143_FTMSms2hcd	21.537	1	44.8	2.3e-10	1	77516.4	HUMAN	Heterogeneous nuclear ribonucleoprotein M
[74]	P52272	Oxidation	M	551	-	29	44.4	9.04	3.9e-16	397.197	2	-1.2	MATGLER	Oxidation@1	MDA_143_FTMSms2hcd	15.338	1	23.7	3.2e-05	1	77516.4	HUMAN	Heterogeneous nuclear ribonucleoprotein M
[74]	P52272	Oxidation	M	558	-	29	44.4	9.04	3.9e-16	460.716	2	-1	MGANNLER	Oxidation@1	MDA_143_FTMSms2hcd	14.832	1	22.1	7.2e-05	1	77516.4	HUMAN	Heterogeneous nuclear ribonucleoprotein M
[74]	P52272	Oxidation	M	571	-	29	44.4	9.04	3.9e-16	447.211	2	-0.47	MGANSLER	Oxidation@1	MDA_143_FTMSms2hcd	15.224	1	27.4	1e-06	1	77516.4	HUMAN	Heterogeneous nuclear ribonucleoprotein M
[74]	P52272	Oxidation	M	607	-	29	44.4	9.04	3.9e-16	708.307	2	1.8	MGLAMGGGGGASFDR	Oxidation@1;Oxidation@5	MDA_143_FTMSms2hcd	23.888	1	50	6.5e-15	1	77516.4	HUMAN	Heterogeneous nuclear ribonucleoprotein M
[74]	P52272	Oxidation	M	611	-	29	44.4	9.04	3.9e-16	708.307	2	1.8	MGLAMGGGGGASFDR	Oxidation@1;Oxidation@5	MDA_143_FTMSms2hcd	23.888	1	50	6.5e-15	1	77516.4	HUMAN	Heterogeneous nuclear ribonucleoprotein M
[75]	O94776	Gln->pyro-Glu	Q	93	-	31	45.4	8.77	1.2e-15	641.333	2	0.87	QFESLPATHIR	Gln->pyro-Glu@1	MDA_143_FTMSms2hcd	35.85	1	38.4	9.6e-10	1	75023.8	HUMAN	Metastasis-associated protein MTA2
[75]	O94776	Gln->pyro-Glu	Q	189	-	31	45.4	8.77	1.2e-15	586.328	2	2.3	QIDQFLVVAR	Gln->pyro-Glu@1	MDA_143_FTMSms2hcd	47.848	1	40.1	3e-08	3	75023.8	HUMAN	Metastasis-associated protein MTA2
[75]	O94776	Gln->pyro-Glu	Q	215	-	31	45.4	8.77	1.2e-15	663.318	2	1.1	QPSLHMSAAAASR	Gln->pyro-Glu@1;Oxidation@6	MDA_143_FTMSms2hcd	22.381	1	48.9	1.8e-10	3	75023.8	HUMAN	Metastasis-associated protein MTA2
[75]	O94776	Oxidation	M	220	-	31	45.4	8.77	1.2e-15	663.318	2	1.1	QPSLHMSAAAASR	Gln->pyro-Glu@1;Oxidation@6	MDA_143_FTMSms2hcd	22.381	1	48.9	1.8e-10	3	75023.8	HUMAN	Metastasis-associated protein MTA2
[75]	O94776	Oxidation	M	235	-	31	45.4	8.77	1.2e-15	526.265	3	1.6	DITLFHAMDTLQR	Oxidation@8	MDA_143_FTMSms2hcd	35.022	1	52	1.8e-10	1	75023.8	HUMAN	Metastasis-associated protein MTA2
[75]	O94776	Oxidation	M	557	-	31	45.4	8.77	1.2e-15	395.728	2	0.24	GLGGIMVK	Oxidation@6	MDA_143_FTMSms2hcd	25.592	1	23.8	9.7e-06	1	75023.8	HUMAN	Metastasis-associated protein MTA2
[75]	O94776	Oxidation	M	625	-	31	45.4	8.77	1.2e-15	329.508	3	-0.54	ALTHLEMR	Oxidation@7	MDA_143_FTMSms2hcd	18.041	1	36.6	8.3e-09	1	75023.8	HUMAN	Metastasis-associated protein MTA2
[75-1]	Q13330	Gln->pyro-Glu	Q	209	-	14	20.7	6.92	3.2e-12	586.328	2	2.3	QIDQFLVVAR	Gln->pyro-Glu@1	MDA_143_FTMSms2hcd	47.848	1	40.1	3e-08	3	80786.9	HUMAN	Metastasis-associated protein MTA1
[75-1]	Q13330	Gln->pyro-Glu	Q	235	-	14	20.7	6.92	3.2e-12	663.318	2	1.1	QPSLHMSAAAASR	Gln->pyro-Glu@1;Oxidation@6	MDA_143_FTMSms2hcd	22.381	1	48.9	1.8e-10	3	80786.9	HUMAN	Metastasis-associated protein MTA1
[75-1]	Q13330	Oxidation	M	240	-	14	20.7	6.92	3.2e-12	663.318	2	1.1	QPSLHMSAAAASR	Gln->pyro-Glu@1;Oxidation@6	MDA_143_FTMSms2hcd	22.381	1	48.9	1.8e-10	3	80786.9	HUMAN	Metastasis-associated protein MTA1
[75-1]	Q13330	Oxidation	M	448	-	14	20.7	6.92	3.2e-12	394.861	3	0.53	SNMSPHGLPAR	Oxidation@3	MDA_143_FTMSms2hcd	17.649	1	30.5	6.8e-08	1	80786.9	HUMAN	Metastasis-associated protein MTA1
[75-1]	Q13330	Oxidation	M	648	-	14	20.7	6.92	3.2e-12	701.818	4	-14	RRRMNWIDAPDDVFYMATEETR	Oxidation@4;Oxidation@16	MDA_143_FTMSms2hcd	38.147	1	16.9	0.00079	1	80786.9	HUMAN	Metastasis-associated protein MTA1
[75-1]	Q13330	Oxidation	M	660	-	14	20.7	6.92	3.2e-12	701.818	4	-14	RRRMNWIDAPDDVFYMATEETR	Oxidation@4;Oxidation@16	MDA_143_FTMSms2hcd	38.147	1	16.9	0.00079	1	80786.9	HUMAN	Metastasis-associated protein MTA1
[75-2]	Q9BTC8	Gln->pyro-Glu	Q	192	-	10	13.1	6.92	3.2e-12	586.328	2	2.3	QIDQFLVVAR	Gln->pyro-Glu@1	MDA_143_FTMSms2hcd	47.848	1	40.1	3e-08	3	67504.3	HUMAN	Metastasis-associated protein MTA3
[75-2]	Q9BTC8	Gln->pyro-Glu	Q	218	-	10	13.1	6.92	3.2e-12	663.318	2	1.1	QPSLHMSAAAASR	Gln->pyro-Glu@1;Oxidation@6	MDA_143_FTMSms2hcd	22.381	1	48.9	1.8e-10	3	67504.3	HUMAN	Metastasis-associated protein MTA3
[75-2]	Q9BTC8	Oxidation	M	223	-	10	13.1	6.92	3.2e-12	663.318	2	1.1	QPSLHMSAAAASR	Gln->pyro-Glu@1;Oxidation@6	MDA_143_FTMSms2hcd	22.381	1	48.9	1.8e-10	3	67504.3	HUMAN	Metastasis-associated protein MTA3
[76]	P63010	Oxidation	M	41	-	27	36.6	8.43	5.2e-15	453.26	2	-0.16	VIAAMTVGK	Oxidation@5	MDA_143_FTMSms2hcd	19.644	1	26	7.2e-07	1	104554	HUMAN	AP-2 complex subunit beta
[76]	P63010	Oxidation	M	175	-	27	36.6	8.43	5.2e-15	1061.79	4	2.5	DLIADSNPMVVANAVAALSEISESHPNSNLLDLNPQNINK	Oxidation@9	MDA_143_FTMSms2hcd	56.772	1	28.7	3.7e-09	1	104554	HUMAN	AP-2 complex subunit beta
[76]	P63010	Oxidation	M	279	-	27	36.6	8.43	5.2e-15	639.291	2	2	DSDYYNMLLK	Oxidation@7	MDA_143_FTMSms2hcd	32.942	1	35.4	4.2e-09	1	104554	HUMAN	AP-2 complex subunit beta
[76]	P63010	Oxidation	M	342	-	27	36.6	8.43	5.2e-15	388.721	2	0.56	LDIMIR	Oxidation@4	MDA_143_FTMSms2hcd	30.219	1	33	8e-06	2	104554	HUMAN	AP-2 complex subunit beta
[76]	P63010	Oxidation	M	777	-	27	36.6	8.43	5.2e-15	1311.03	3	3.1	NSFGVIPSTPLAIHTPLMPNQSIDVSLPLNTLGPVMK	Oxidation@18;Oxidation@36	MDA_143_FTMSms2hcd	51.988	1	56.6	1.5e-12	1	104554	HUMAN	AP-2 complex subunit beta
[76]	P63010	Oxidation	M	795	-	27	36.6	8.43	5.2e-15	1311.03	3	3.1	NSFGVIPSTPLAIHTPLMPNQSIDVSLPLNTLGPVMK	Oxidation@18;Oxidation@36	MDA_143_FTMSms2hcd	51.988	1	56.6	1.5e-12	1	104554	HUMAN	AP-2 complex subunit beta
[76]	P63010	Oxidation	M	797	-	27	36.6	8.43	5.2e-15	686.369	2	0.045	MEPLNNLQVAVK	Oxidation@1	MDA_143_FTMSms2hcd	32.191	1	36.4	5.4e-08	2	104554	HUMAN	AP-2 complex subunit beta
[76]	P63010	Oxidation	M	886	-	27	36.6	8.43	5.2e-15	770.871	2	2.4	NVEGQDMLYQSLK	Oxidation@7	MDA_143_FTMSms2hcd	29.546	1	49.5	4.2e-12	2	104554	HUMAN	AP-2 complex subunit beta
[76-1]	Q10567	Oxidation	M	41	-	18	20.3	7.21	9.8e-13	501.233	2	-14	VIASMTVGK	Oxidation@5;Phospho@4|6	MDA_143_FTMSms2hcd	43.07	1	16.1	0.00046	1	104638	HUMAN	AP-1 complex subunit beta-1
[76-1]	Q10567	Oxidation	M	342	-	18	20.3	7.21	9.8e-13	388.721	2	0.56	LDIMIR	Oxidation@4	MDA_143_FTMSms2hcd	30.219	1	33	8e-06	2	104638	HUMAN	AP-1 complex subunit beta-1
[76-1]	Q10567	Oxidation	M	806	-	18	20.3	7.21	9.8e-13	686.369	2	0.045	MEPLNNLQVAVK	Oxidation@1	MDA_143_FTMSms2hcd	32.191	1	36.4	5.4e-08	2	104638	HUMAN	AP-1 complex subunit beta-1
[76-1]	Q10567	Oxidation	M	845	-	18	20.3	7.21	9.8e-13	520.765	2	-0.039	QMFLATWK	Oxidation@2	MDA_143_FTMSms2hcd	33.086	1	20.4	5e-05	1	104638	HUMAN	AP-1 complex subunit beta-1
[76-1]	Q10567	Oxidation	M	895	-	18	20.3	7.21	9.8e-13	770.871	2	2.4	NVEGQDMLYQSLK	Oxidation@7	MDA_143_FTMSms2hcd	29.546	1	49.5	4.2e-12	2	104638	HUMAN	AP-1 complex subunit beta-1
[77]	Q9H9E3	Acetyl	K	374	-	29	41	7.59	1.9e-13	388.245	2	0.82	FLKKR	Acetyl@3;Acetyl@4	MDA_143_FTMSms2hcd	33.495	1	16	0.027	1	89083.9	HUMAN	Conserved oligomeric Golgi complex subunit 4
[77]	Q9H9E3	Acetyl	K	375	-	29	41	7.59	1.9e-13	388.245	2	0.82	FLKKR	Acetyl@3;Acetyl@4	MDA_143_FTMSms2hcd	33.495	1	16	0.027	1	89083.9	HUMAN	Conserved oligomeric Golgi complex subunit 4
[77]	Q9H9E3	Oxidation	M	74	-	29	41	7.59	1.9e-13	386.71	2	-0.12	MVTLHR	Oxidation@1	MDA_143_FTMSms2hcd	15.548	1	21.4	9.6e-05	1	89083.9	HUMAN	Conserved oligomeric Golgi complex subunit 4
[77]	Q9H9E3	Oxidation	M	80	-	29	41	7.59	1.9e-13	701.356	2	1.1	MGPNLQLIEGDAK	Oxidation@1	MDA_143_FTMSms2hcd	33.837	1	47.4	1e-10	1	89083.9	HUMAN	Conserved oligomeric Golgi complex subunit 4
[77]	Q9H9E3	Oxidation	M	253	-	29	41	7.59	1.9e-13	661.316	3	1.5	AEENLLMVLGTDMSDRR	Oxidation@7;Oxidation@13	MDA_143_FTMSms2hcd	37.724	1	32.3	2.4e-07	1	89083.9	HUMAN	Conserved oligomeric Golgi complex subunit 4
[77]	Q9H9E3	Oxidation	M	259	-	29	41	7.59	1.9e-13	661.316	3	1.5	AEENLLMVLGTDMSDRR	Oxidation@7;Oxidation@13	MDA_143_FTMSms2hcd	37.724	1	32.3	2.4e-07	1	89083.9	HUMAN	Conserved oligomeric Golgi complex subunit 4
[77]	Q9H9E3	Oxidation	M	339	-	29	41	7.59	1.9e-13	514.259	2	-0.049	HVQNNLMR	Oxidation@7	MDA_143_FTMSms2hcd	13.754	1	26.1	2e-06	1	89083.9	HUMAN	Conserved oligomeric Golgi complex subunit 4
[77]	Q9H9E3	Oxidation	M	362	-	29	41	7.59	1.9e-13	865.956	2	3.1	ELDPILTEVTLMNAR	Oxidation@12	MDA_143_FTMSms2hcd	43.629	1	53.2	2.8e-11	1	89083.9	HUMAN	Conserved oligomeric Golgi complex subunit 4
[77]	Q9H9E3	Oxidation	M	450	-	29	41	7.59	1.9e-13	909.456	2	2.8	GQLTSSMVDDVFYIVK	Oxidation@7	MDA_143_FTMSms2hcd	43.558	1	53.5	1.9e-13	1	89083.9	HUMAN	Conserved oligomeric Golgi complex subunit 4
[77]	Q9H9E3	Oxidation	M	499	-	29	41	7.59	1.9e-13	764.368	2	1.6	MGFPATTFQDIQR	Oxidation@1	MDA_143_FTMSms2hcd	35.441	1	40.1	6.1e-10	1	89083.9	HUMAN	Conserved oligomeric Golgi complex subunit 4
[77]	Q9H9E3	Oxidation	M	520	-	29	41	7.59	1.9e-13	591.638	3	1.5	GVTSAVNIMHSSLQQGK	Oxidation@9	MDA_143_FTMSms2hcd	25.368	1	45	7.8e-12	1	89083.9	HUMAN	Conserved oligomeric Golgi complex subunit 4
[77]	Q9H9E3	Oxidation	M	679	-	29	41	7.59	1.9e-13	884.809	3	3	ASLSPVIYDSLTGLMTSLVAVELEK	Oxidation@15	MDA_143_FTMSms2hcd	57.719	1	41.9	1.4e-11	1	89083.9	HUMAN	Conserved oligomeric Golgi complex subunit 4
[77]	Q9H9E3	Oxidation	M	733	-	29	41	7.59	1.9e-13	702.88	2	0.43	LSQMATILNLER	Oxidation@4	MDA_143_FTMSms2hcd	34.969	1	40.9	2.1e-09	1	89083.9	HUMAN	Conserved oligomeric Golgi complex subunit 4
[78]	Q96T76	Oxidation	M	159	-	28	34.5	8.48	4.3e-15	508.927	3	2.2	HTVYNIITNFMR	Oxidation@11	MDA_143_FTMSms2hcd	36.202	1	35.2	1.2e-08	1	113291	HUMAN	MMS19 nucleotide excision repair protein homolog
[78]	Q96T76	Oxidation	M	181	-	28	34.5	8.48	4.3e-15	782.709	3	1.9	SLGADFTFGFIQVMDGEKDPR	Oxidation@14	MDA_143_FTMSms2hcd	45.004	1	38.3	4e-11	1	113291	HUMAN	MMS19 nucleotide excision repair protein homolog
[78]	Q96T76	Oxidation	M	416	-	28	34.5	8.48	4.3e-15	483.956	3	1.9	RTILEMLLGFLK	Oxidation@6	MDA_143_FTMSms2hcd	57.289	1	19.9	1.9e-06	1	113291	HUMAN	MMS19 nucleotide excision repair protein homolog
[78]	Q96T76	Oxidation	M	738	-	28	34.5	8.48	4.3e-15	735.892	2	1.8	NVEIPQLNQLMR	Oxidation@11	MDA_143_FTMSms2hcd	38.151	1	45.1	8e-09	1	113291	HUMAN	MMS19 nucleotide excision repair protein homolog
[78]	Q96T76	Oxidation	M	968	-	28	34.5	8.48	4.3e-15	712.864	2	0.49	FLNLSSSPSMAVR	Oxidation@10	MDA_143_FTMSms2hcd	32.887	1	43.6	6.6e-10	1	113291	HUMAN	MMS19 nucleotide excision repair protein homolog
[79]	P05023	Gln->pyro-Glu	Q	744	-	28	29.6	8.49	4.2e-15	1232.09	2	2.3	QAADMILLDDNFASIVTGVEEGR	Gln->pyro-Glu@1;Oxidation@5	MDA_143_FTMSms2hcd	57.016	1	58.5	4.2e-15	1	112897	HUMAN	Sodium/potassium-transporting ATPase subunit alpha-1
[79]	P05023	Oxidation	M	158	-	28	29.6	8.49	4.2e-15	385.691	2	0.29	IMESFK	Oxidation@2	MDA_143_FTMSms2hcd	19.62	1	24.9	3.5e-07	1	112897	HUMAN	Sodium/potassium-transporting ATPase subunit alpha-1
[79]	P05023	Oxidation	M	164	-	28	29.6	8.49	4.2e-15	642.859	2	0.82	NMVPQQALVIR	Oxidation@2	MDA_143_FTMSms2hcd	30.695	1	27.4	5.8e-06	1	112897	HUMAN	Sodium/potassium-transporting ATPase subunit alpha-1
[79]	P05023	Oxidation	M	178	-	28	29.6	8.49	4.2e-15	923.979	2	2.4	MSINAEEVVVGDLVEVK	Oxidation@1	MDA_143_FTMSms2hcd	44.656	1	60.5	2.5e-13	1	112897	HUMAN	Sodium/potassium-transporting ATPase subunit alpha-1
[79]	P05023	Oxidation	M	615	-	28	29.6	8.49	4.2e-15	466.587	3	1.2	VIMVTGDHPITAK	Oxidation@3	MDA_143_FTMSms2hcd	24.755	1	34	3e-07	1	112897	HUMAN	Sodium/potassium-transporting ATPase subunit alpha-1
[79]	P05023	Oxidation	M	734	-	28	29.6	8.49	4.2e-15	545.619	3	0.76	KADIGVAMGIAGSDVSK	Oxidation@8	MDA_143_FTMSms2hcd	26.277	1	37.4	5.3e-09	1	112897	HUMAN	Sodium/potassium-transporting ATPase subunit alpha-1
[79]	P05023	Oxidation	M	748	-	28	29.6	8.49	4.2e-15	1232.09	2	2.3	QAADMILLDDNFASIVTGVEEGR	Gln->pyro-Glu@1;Oxidation@5	MDA_143_FTMSms2hcd	57.016	1	58.5	4.2e-15	1	112897	HUMAN	Sodium/potassium-transporting ATPase subunit alpha-1
[79]	P05023	Oxidation	M	949	-	28	29.6	8.49	4.2e-15	527.754	2	1.6	NSVFQQGMK	Oxidation@8	MDA_143_FTMSms2hcd	19.336	1	33.5	1.5e-07	1	112897	HUMAN	Sodium/potassium-transporting ATPase subunit alpha-1
[80]	Q9UHB9	Oxidation	M	196	-	28	45.1	10.32	1.7e-18	644.67	3	2.8	TKLEAQAYTAYLSGMLR	Oxidation@15	MDA_143_FTMSms2hcd	37.857	1	44.4	6.8e-11	1	70730.2	HUMAN	Signal recognition particle subunit SRP68
[81]	O95373	Gln->pyro-Glu	Q	991	-	23	25.7	7.12	1.4e-12	677.852	2	0.3	QLQDIATLADQR	Gln->pyro-Glu@1	MDA_143_FTMSms2hcd	44.135	1	40.4	1.2e-08	1	119518	HUMAN	Importin-7
[81]	O95373	Oxidation	M	174	-	23	25.7	7.12	1.4e-12	556.317	3	1.5	SPLVAAMQHFLPVLK	Oxidation@7	MDA_143_FTMSms2hcd	41.069	1	36.2	1.3e-09	1	119518	HUMAN	Importin-7
[81]	O95373	Oxidation	M	435	-	23	25.7	7.12	1.4e-12	609.015	3	3	KDGALHMIGSLAEILLK	Oxidation@7	MDA_143_FTMSms2hcd	46.215	1	43	2.9e-09	1	119518	HUMAN	Importin-7
[81]	O95373	Oxidation	M	511	-	23	25.7	7.12	1.4e-12	776.095	3	1.2	EMPVKVEAAIALQVLISNQEK	Oxidation@2	MDA_143_FTMSms2hcd	48.473	1	35.6	8.3e-07	1	119518	HUMAN	Importin-7
[81]	O95373	Oxidation	M	543	-	23	25.7	7.12	1.4e-12	582.334	4	1.4	EYITPFIRPVMQALLHIIR	Oxidation@11	MDA_143_FTMSms2hcd	53.224	1	48.9	2.1e-11	1	119518	HUMAN	Importin-7
[81]	O95373	Oxidation	M	1037	-	23	25.7	7.12	1.4e-12	998.468	2	0.5	FSAPVVPSSFNFGGPAPGMN	Oxidation@19	MDA_143_FTMSms2hcd	45.84	1	37.1	1.7e-11	1	119518	HUMAN	Importin-7
[82]	Q9NVE7	Gln->pyro-Glu	Q	493	-	29	38.2	9.47	6.2e-17	682.355	2	0.91	QQPFAYGTLTVR	Gln->pyro-Glu@1	MDA_143_FTMSms2hcd	41.103	1	43.1	6e-09	1	85991.7	HUMAN	4'-phosphopantetheine phosphatase
[82]	Q9NVE7	Oxidation	M	252	-	29	38.2	9.47	6.2e-17	424.544	3	0.36	GQHSNVDMLVR	Oxidation@8	MDA_143_FTMSms2hcd	20.766	1	31.1	1e-06	1	85991.7	HUMAN	4'-phosphopantetheine phosphatase
[82]	Q9NVE7	Oxidation	M	291	-	29	38.2	9.47	6.2e-17	558.583	3	0.92	SATADQEFSKEDMAK	Oxidation@13	MDA_143_FTMSms2hcd	18.757	1	59.4	6.2e-17	1	85991.7	HUMAN	4'-phosphopantetheine phosphatase
[82]	Q9NVE7	Oxidation	M	726	-	29	38.2	9.47	6.2e-17	616.82	2	1.3	GADLVVIEGMGR	Oxidation@10	MDA_143_FTMSms2hcd	31.241	1	38.1	1.2e-09	1	85991.7	HUMAN	4'-phosphopantetheine phosphatase
[83]	Q7Z4Q2	Oxidation	M	124	-	26	32.4	10.87	1.6e-19	615.364	2	1.9	DIMTPLVALLK	Oxidation@3	MDA_143_FTMSms2hcd	48.217	1	38.5	8.5e-08	1	74583.4	HUMAN	HEAT repeat-containing protein 3
[83]	Q7Z4Q2	Oxidation	M	327	-	26	32.4	10.87	1.6e-19	1068.81	3	2.3	TAAEAEEILENTNGDDLIEDDEMEGISHK	Oxidation@23	MDA_143_FTMSms2hcd	38.505	1	79.8	1.6e-19	1	74583.4	HUMAN	HEAT repeat-containing protein 3
[83]	Q7Z4Q2	Oxidation	M	526	-	26	32.4	10.87	1.6e-19	489.769	2	1.1	ALLQTMASK	Oxidation@6	MDA_143_FTMSms2hcd	21.336	1	38.9	1.7e-06	1	74583.4	HUMAN	HEAT repeat-containing protein 3
[84]	Q14746	Gln->pyro-Glu	Q	628	-	26	43.5	10.41	1.1e-18	1026.53	2	2.5	QAIIQQWLEGTLSESTHK	Gln->pyro-Glu@1	MDA_143_FTMSms2hcd	55.134	1	62	2.9e-13	1	83208.2	HUMAN	Conserved oligomeric Golgi complex subunit 2
[84]	Q14746	Oxidation	M	60	-	26	43.5	10.41	1.1e-18	517.782	2	0.84	TAMVELINK	Oxidation@3	MDA_143_FTMSms2hcd	25.597	1	34	1.4e-07	1	83208.2	HUMAN	Conserved oligomeric Golgi complex subunit 2
[84]	Q14746	Oxidation	M	81	-	26	43.5	10.41	1.1e-18	959.449	2	0.55	DYADFVNLSTNLVGMDK	Oxidation@15	MDA_143_FTMSms2hcd	44.046	1	64.3	1.1e-18	1	83208.2	HUMAN	Conserved oligomeric Golgi complex subunit 2
[84]	Q14746	Oxidation	M	190	-	26	43.5	10.41	1.1e-18	395.212	2	-0.23	GMPLLDK	Oxidation@2	MDA_143_FTMSms2hcd	21.025	1	20.2	0.0013	1	83208.2	HUMAN	Conserved oligomeric Golgi complex subunit 2
[84]	Q14746	Oxidation	M	540	-	26	43.5	10.41	1.1e-18	427.229	2	1.3	LEMIGFK	Oxidation@3	MDA_143_FTMSms2hcd	28.104	1	24.4	3e-05	1	83208.2	HUMAN	Conserved oligomeric Golgi complex subunit 2
[84]	Q14746	Oxidation	M	685	-	26	43.5	10.41	1.1e-18	677.654	3	1.2	TTPANPVGPSGGMSDDDKIR	Oxidation@13	MDA_143_FTMSms2hcd	22.711	1	72.5	7.9e-15	1	83208.2	HUMAN	Conserved oligomeric Golgi complex subunit 2
[85]	Q9UJC3	Gln->pyro-Glu	Q	281	-	28	36.7	7.98	3.6e-14	527.278	2	1.6	QLIEFQHR	Gln->pyro-Glu@1	MDA_143_FTMSms2hcd	33.844	1	33	9.5e-08	1	84648.6	HUMAN	Protein Hook homolog 1
[85]	Q9UJC3	Oxidation	M	459	-	28	36.7	7.98	3.6e-14	900.93	2	2.9	SYENLAAEIMPVEYR	Oxidation@10	MDA_143_FTMSms2hcd	38.418	1	58.4	3.6e-14	1	84648.6	HUMAN	Protein Hook homolog 1
[85]	Q9UJC3	Oxidation	M	503	-	28	36.7	7.98	3.6e-14	647.309	2	0.6	KMNELETEQR	Oxidation@2	MDA_143_FTMSms2hcd	14.961	1	39.9	3.7e-09	1	84648.6	HUMAN	Protein Hook homolog 1
[85]	Q9UJC3	Oxidation	M	632	-	28	36.7	7.98	3.6e-14	672.372	2	1.3	LNPASAEIMLLR	Oxidation@9	MDA_143_FTMSms2hcd	39.392	1	47.9	9.3e-08	1	84648.6	HUMAN	Protein Hook homolog 1
[86]	Q86UA1	Acetyl	K	140	-	27	47.4	7.73	1e-13	811.39	3	-12	YADLEKRHDNIKPSDEVYR	Acetyl@6;Acetyl@12	MDA_143_FTMSms2hcd	31.369	1	18.4	0.0068	1	78430.4	HUMAN	Pre-mRNA-processing factor 39
[86]	Q86UA1	Acetyl	K	146	-	27	47.4	7.73	1e-13	811.39	3	-12	YADLEKRHDNIKPSDEVYR	Acetyl@6;Acetyl@12	MDA_143_FTMSms2hcd	31.369	1	18.4	0.0068	1	78430.4	HUMAN	Pre-mRNA-processing factor 39
[86]	Q86UA1	Acetyl+Oxidation	M	1	-	27	47.4	7.73	1e-13	692.768	2	1.7	MQNSHMDEYR	Acetyl+Oxidation@1;Oxidation@6	MDA_143_FTMSms2hcd	15.744	1	40.4	2.4e-10	1	78430.4	HUMAN	Pre-mRNA-processing factor 39
[86]	Q86UA1	Oxidation	M	6	-	27	47.4	7.73	1e-13	692.768	2	1.7	MQNSHMDEYR	Acetyl+Oxidation@1;Oxidation@6	MDA_143_FTMSms2hcd	15.744	1	40.4	2.4e-10	1	78430.4	HUMAN	Pre-mRNA-processing factor 39
[86]	Q86UA1	Oxidation	M	112	-	27	47.4	7.73	1e-13	1161.22	3	1.9	TVENNPQDFTGWVYLLQYVEQENHLMAAR	Oxidation@26	MDA_143_FTMSms2hcd	56.457	1	20.9	1.2e-07	1	78430.4	HUMAN	Pre-mRNA-processing factor 39
[86]	Q86UA1	Oxidation	M	309	-	27	47.4	7.73	1e-13	567.796	2	1.8	LITEIENMR	Oxidation@8	MDA_143_FTMSms2hcd	26.361	1	32.7	4.5e-07	1	78430.4	HUMAN	Pre-mRNA-processing factor 39
[86]	Q86UA1	Oxidation	M	397	-	27	47.4	7.73	1e-13	450.875	3	0.72	YMENHSIEGVR	Oxidation@2	MDA_143_FTMSms2hcd	19.304	1	43.8	1.7e-09	1	78430.4	HUMAN	Pre-mRNA-processing factor 39
[86]	Q86UA1	Oxidation	M	422	-	27	47.4	7.73	1e-13	658.568	4	1.8	KPMVHMLWAAFEEQQGNINEAR	Oxidation@3;Oxidation@6	MDA_143_FTMSms2hcd	35.382	1	44.2	2.4e-09	1	78430.4	HUMAN	Pre-mRNA-processing factor 39
[86]	Q86UA1	Oxidation	M	425	-	27	47.4	7.73	1e-13	658.568	4	1.8	KPMVHMLWAAFEEQQGNINEAR	Oxidation@3;Oxidation@6	MDA_143_FTMSms2hcd	35.382	1	44.2	2.4e-09	1	78430.4	HUMAN	Pre-mRNA-processing factor 39
[86-1]	Q13263	Oxidation	M	135	-	24	38	8.28	9.9e-15	601.78	2	1.1	DIVENYFMR	Oxidation@8	MDA_143_FTMSms2hcd	34.441	1	30.1	5.5e-08	1	88550.5	HUMAN	Transcription intermediary factor 1-beta
[86-1]	Q13263	Oxidation	M	297	-	24	38	8.28	9.9e-15	490.27	2	1.3	MAILQIMK	Oxidation@1;Oxidation@7	MDA_143_FTMSms2hcd	28.46	1	34.1	1.1e-07	1	88550.5	HUMAN	Transcription intermediary factor 1-beta
[86-1]	Q13263	Oxidation	M	303	-	24	38	8.28	9.9e-15	490.27	2	1.3	MAILQIMK	Oxidation@1;Oxidation@7	MDA_143_FTMSms2hcd	28.46	1	34.1	1.1e-07	1	88550.5	HUMAN	Transcription intermediary factor 1-beta
[86-1]	Q13263	Oxidation	M	423	-	24	38	8.28	9.9e-15	679.019	3	1.9	IVAERPGTNSTGPAPMAPPR	Oxidation@16	MDA_143_FTMSms2hcd	23.273	1	69.5	2.2e-14	1	88550.5	HUMAN	Transcription intermediary factor 1-beta
[86-1]	Q13263	Oxidation	M	482	-	24	38	8.28	9.9e-15	569.264	2	0.58	SGEGEVSGLMR	Oxidation@10	MDA_143_FTMSms2hcd	21.165	1	47.5	9.9e-15	1	88550.5	HUMAN	Transcription intermediary factor 1-beta
[86-1]	Q13263	Oxidation	M	550	-	24	38	8.28	9.9e-15	1252.63	5	2.5	GAAAAATGQPGTAPAGTPGAPPLAGMAIVKEEETEAAIGAPPTATEGPETKPVLMALAEGPGAEGPR	Oxidation@26;Oxidation@55	MDA_143_FTMSms2hcd	44.689	1	40.7	7.1e-10	1	88550.5	HUMAN	Transcription intermediary factor 1-beta
[86-1]	Q13263	Oxidation	M	579	-	24	38	8.28	9.9e-15	1252.63	5	2.5	GAAAAATGQPGTAPAGTPGAPPLAGMAIVKEEETEAAIGAPPTATEGPETKPVLMALAEGPGAEGPR	Oxidation@26;Oxidation@55	MDA_143_FTMSms2hcd	44.689	1	40.7	7.1e-10	1	88550.5	HUMAN	Transcription intermediary factor 1-beta
[86-1]	Q13263	Oxidation	M	796	-	24	38	8.28	9.9e-15	514.722	2	0.76	MNEAFGDTK	Oxidation@1	MDA_143_FTMSms2hcd	17.238	1	26.1	1.7e-06	1	88550.5	HUMAN	Transcription intermediary factor 1-beta
[86-1]	Q13263	Oxidation	M	815	-	24	38	8.28	9.9e-15	989.488	3	1	FSAVLVEPPPMSLPGAGLSSQELSGGPGDGP	Oxidation@11	MDA_143_FTMSms2hcd	47.302	1	32.9	4.7e-09	1	88550.5	HUMAN	Transcription intermediary factor 1-beta
[87]	Q8TAT6	Met-loss+Acetyl	M	1	-	25	35.2	7.54	2.3e-13	422.25	2	0.094	MAESIIIR	Met-loss+Acetyl@1	MDA_143_FTMSms2hcd	36.366	1	32.2	0.0022	1	68120.8	HUMAN	Nuclear protein localization protein 4 homolog
[87]	Q8TAT6	Oxidation	M	89	-	25	35.2	7.54	2.3e-13	988.49	3	1.9	HGDLLFLFPSSLAGPSSEMETSVPPGFK	Oxidation@19	MDA_143_FTMSms2hcd	49.922	1	63.5	2.3e-13	1	68120.8	HUMAN	Nuclear protein localization protein 4 homolog
[87]	Q8TAT6	Oxidation	M	162	-	25	35.2	7.54	2.3e-13	393.191	3	0.36	HMSFHAYIR	Oxidation@2	MDA_143_FTMSms2hcd	21.459	1	31.1	1.6e-06	1	68120.8	HUMAN	Nuclear protein localization protein 4 homolog
[87]	Q8TAT6	Oxidation	M	227	-	25	35.2	7.54	2.3e-13	605.282	3	1.9	HVDNIMFENHTVADR	Oxidation@6	MDA_143_FTMSms2hcd	24.123	1	53.7	2.4e-13	1	68120.8	HUMAN	Nuclear protein localization protein 4 homolog
[88]	P61221	Acetyl	K	513	-	26	45.4	8.47	4.4e-15	762.372	3	-11	KTAFVVEHDFIMATYLADR	Acetyl@1;Oxidation@12	MDA_143_FTMSms2hcd	48.895	1	18	0.0055	1	67315	HUMAN	ATP-binding cassette sub-family E member 1
[88]	P61221	Gln->pyro-Glu	Q	426	-	26	45.4	8.47	4.4e-15	375.711	2	0.077	QLLHEK	Gln->pyro-Glu@1	MDA_143_FTMSms2hcd	22.177	1	23.2	0.00013	1	67315	HUMAN	ATP-binding cassette sub-family E member 1
[88]	P61221	Oxidation	M	239	-	26	45.4	8.47	4.4e-15	946.937	2	2.5	ADIFMFDEPSSYLDVK	Oxidation@5	MDA_143_FTMSms2hcd	45.293	1	58.1	6.9e-15	1	67315	HUMAN	ATP-binding cassette sub-family E member 1
[88]	P61221	Oxidation	M	446	-	26	45.4	8.47	4.4e-15	1033.02	4	2.3	DAYTHPQFVTDVMKPLQIENIIDQEVQTLSGGELQR	Oxidation@13	MDA_143_FTMSms2hcd	53.802	1	65.7	2.6e-13	1	67315	HUMAN	ATP-binding cassette sub-family E member 1
[88]	P61221	Oxidation	M	524	-	26	45.4	8.47	4.4e-15	762.372	3	-11	KTAFVVEHDFIMATYLADR	Acetyl@1;Oxidation@12	MDA_143_FTMSms2hcd	48.895	1	18	0.0055	1	67315	HUMAN	ATP-binding cassette sub-family E member 1
[88]	P61221	Oxidation	M	555	-	26	45.4	8.47	4.4e-15	837.93	2	2.5	NTVANSPQTLLAGMNK	Oxidation@14	MDA_143_FTMSms2hcd	30.198	1	65.5	2e-12	1	67315	HUMAN	ATP-binding cassette sub-family E member 1
[89]	P55884	Oxidation	M	441	-	22	33.4	7.48	3.1e-13	763.386	3	1.9	MTLDTLSIYETPSMGLLDKK	Oxidation@1;Oxidation@14	MDA_143_FTMSms2hcd	39.393	1	57.2	1.1e-11	1	92482.4	HUMAN	Eukaryotic translation initiation factor 3 subunit B
[89]	P55884	Oxidation	M	454	-	22	33.4	7.48	3.1e-13	763.386	3	1.9	MTLDTLSIYETPSMGLLDKK	Oxidation@1;Oxidation@14	MDA_143_FTMSms2hcd	39.393	1	57.2	1.1e-11	1	92482.4	HUMAN	Eukaryotic translation initiation factor 3 subunit B
[89]	P55884	Oxidation	M	561	-	22	33.4	7.48	3.1e-13	580.306	2	1.2	QVPVDVVEMK	Oxidation@9	MDA_143_FTMSms2hcd	27.3	1	40.6	7.8e-08	1	92482.4	HUMAN	Eukaryotic translation initiation factor 3 subunit B
[89]	P55884	Oxidation	M	753	-	22	33.4	7.48	3.1e-13	363.828	3	-1.1	TMMEDFRK	Oxidation@2;Oxidation@3	MDA_143_FTMSms2hcd	14.871	1	30.3	1.1e-06	1	92482.4	HUMAN	Eukaryotic translation initiation factor 3 subunit B
[89]	P55884	Oxidation	M	754	-	22	33.4	7.48	3.1e-13	363.828	3	-1.1	TMMEDFRK	Oxidation@2;Oxidation@3	MDA_143_FTMSms2hcd	14.871	1	30.3	1.1e-06	1	92482.4	HUMAN	Eukaryotic translation initiation factor 3 subunit B
[89]	P55884	Oxidation	M	763	-	22	33.4	7.48	3.1e-13	651.79	2	1.7	MAQELYMEQK	Oxidation@1;Oxidation@7	MDA_143_FTMSms2hcd	20.168	1	44	1.8e-09	1	92482.4	HUMAN	Eukaryotic translation initiation factor 3 subunit B
[89]	P55884	Oxidation	M	769	-	22	33.4	7.48	3.1e-13	651.79	2	1.7	MAQELYMEQK	Oxidation@1;Oxidation@7	MDA_143_FTMSms2hcd	20.168	1	44	1.8e-09	1	92482.4	HUMAN	Eukaryotic translation initiation factor 3 subunit B
[90]	P42704	Oxidation	M	188	-	20	20.3	8.16	1.7e-14	609.283	2	0.83	MEEANIQPNR	Oxidation@1	MDA_143_FTMSms2hcd	18.04	1	36.5	2.1e-10	1	157906	HUMAN	Leucine-rich PPR motif-containing protein, mitochondrial
[90]	P42704	Oxidation	M	592	-	20	20.3	8.16	1.7e-14	917.436	3	2.8	GPTEAVGYFLYNLIDSMSDSEVQAK	Oxidation@17	MDA_143_FTMSms2hcd	55.502	1	56.6	1.7e-14	1	157906	HUMAN	Leucine-rich PPR motif-containing protein, mitochondrial
[90]	P42704	Oxidation	M	1325	-	20	20.3	8.16	1.7e-14	822.423	3	2.1	SVLELIPELNEKEEAYNSLMK	Oxidation@20	MDA_143_FTMSms2hcd	43.948	1	60.5	2.9e-14	1	157906	HUMAN	Leucine-rich PPR motif-containing protein, mitochondrial
[91]	P40763	Oxidation	M	28	-	24	39.4	8.42	5.6e-15	762.371	3	2.9	YLEQLHQLYSDSFPMELR	Oxidation@15	MDA_143_FTMSms2hcd	41.734	1	24.8	1.2e-06	1	88068.6	HUMAN	Signal transducer and activator of transcription 3
[91]	P40763	Oxidation	M	99	-	24	39.4	8.42	5.6e-15	422.557	3	0.96	YLEKPMEIAR	Oxidation@6	MDA_143_FTMSms2hcd	22.432	1	48	2.4e-08	1	88068.6	HUMAN	Signal transducer and activator of transcription 3
[91]	P40763	Oxidation	M	228	-	24	39.4	8.42	5.6e-15	977.517	2	3.4	SIVSELAGLLSAMEYVQK	Oxidation@13	MDA_143_FTMSms2hcd	56.366	1	64.3	5.6e-15	1	88068.6	HUMAN	Signal transducer and activator of transcription 3
[91]	P40763	Oxidation	M	304	-	24	39.4	8.42	5.6e-15	423.967	4	-0.26	GDPIVQHRPMLEER	Oxidation@10	MDA_143_FTMSms2hcd	23.029	1	22.9	4.9e-05	1	88068.6	HUMAN	Signal transducer and activator of transcription 3
[91]	P40763	Oxidation	M	648	-	24	39.4	8.42	5.6e-15	959.959	2	3.5	QQLNNMSFAEIIMGYK	Oxidation@6;Oxidation@13	MDA_143_FTMSms2hcd	41.996	1	50.2	1.9e-14	1	88068.6	HUMAN	Signal transducer and activator of transcription 3
[91]	P40763	Oxidation	M	655	-	24	39.4	8.42	5.6e-15	959.959	2	3.5	QQLNNMSFAEIIMGYK	Oxidation@6;Oxidation@13	MDA_143_FTMSms2hcd	41.996	1	50.2	1.9e-14	1	88068.6	HUMAN	Signal transducer and activator of transcription 3
[91]	P40763	Oxidation	M	660	-	24	39.4	8.42	5.6e-15	797.77	3	3.2	IMDATNILVSPLVYLYPDIPK	Oxidation@2	MDA_143_FTMSms2hcd	56.343	1	40.4	5.9e-12	1	88068.6	HUMAN	Signal transducer and activator of transcription 3
[92]	P40939	Oxidation	M	215	-	25	37.2	8.61	2.5e-15	764.076	3	1.5	MGLVDQLVEPLGPGLKPPEER	Oxidation@1	MDA_143_FTMSms2hcd	42.214	1	60.6	9.7e-12	1	83000.4	HUMAN	Trifunctional enzyme subunit alpha, mitochondrial
[92]	P40939	Oxidation	M	443	-	25	37.2	8.61	2.5e-15	848.431	2	2.6	ADMVIEAVFEDLSLK	Oxidation@3	MDA_143_FTMSms2hcd	52.572	1	48.2	3.8e-11	1	83000.4	HUMAN	Trifunctional enzyme subunit alpha, mitochondrial
[92]	P40939	Oxidation	M	497	-	25	37.2	8.61	2.5e-15	470.236	3	0.35	VIGMHYFSPVDK	Oxidation@4	MDA_143_FTMSms2hcd	27.591	1	36.4	3.5e-09	1	83000.4	HUMAN	Trifunctional enzyme subunit alpha, mitochondrial
[92]	P40939	Oxidation	M	506	-	25	37.2	8.61	2.5e-15	667.866	2	1.3	MQLLEIITTEK	Oxidation@1	MDA_143_FTMSms2hcd	39.175	1	34.9	6.7e-08	1	83000.4	HUMAN	Trifunctional enzyme subunit alpha, mitochondrial
[92]	P40939	Oxidation	M	622	-	25	37.2	8.61	2.5e-15	797.402	2	1.3	FGGGNPELLTQMVSK	Oxidation@12	MDA_143_FTMSms2hcd	32.554	1	48.3	6.4e-11	1	83000.4	HUMAN	Trifunctional enzyme subunit alpha, mitochondrial
[93]	Q09161	Oxidation	M	108	-	20	28.9	10.09	4.5e-18	831.885	2	2.2	NYNFGGEFVEAMIR	Oxidation@12	MDA_143_FTMSms2hcd	39.458	1	50.5	4.5e-13	1	91840.3	HUMAN	Nuclear cap-binding protein subunit 1
[93]	Q09161	Oxidation	M	291	-	20	28.9	10.09	4.5e-18	800.005	3	1.4	MFDYTDDPEGPVMPGSHSVER	Oxidation@1;Oxidation@13	MDA_143_FTMSms2hcd	28.818	1	66.5	6.8e-17	1	91840.3	HUMAN	Nuclear cap-binding protein subunit 1
[93]	Q09161	Oxidation	M	303	-	20	28.9	10.09	4.5e-18	800.005	3	1.4	MFDYTDDPEGPVMPGSHSVER	Oxidation@1;Oxidation@13	MDA_143_FTMSms2hcd	28.818	1	66.5	6.8e-17	1	91840.3	HUMAN	Nuclear cap-binding protein subunit 1
[93]	Q09161	Oxidation	M	397	-	20	28.9	10.09	4.5e-18	760.059	3	2	LQPGSLPQVLAQATEMLYMR	Oxidation@16;Oxidation@19	MDA_143_FTMSms2hcd	53.242	1	53.5	2.1e-16	1	91840.3	HUMAN	Nuclear cap-binding protein subunit 1
[93]	Q09161	Oxidation	M	400	-	20	28.9	10.09	4.5e-18	760.059	3	2	LQPGSLPQVLAQATEMLYMR	Oxidation@16;Oxidation@19	MDA_143_FTMSms2hcd	53.242	1	53.5	2.1e-16	1	91840.3	HUMAN	Nuclear cap-binding protein subunit 1
[93]	Q09161	Oxidation	M	600	-	20	28.9	10.09	4.5e-18	690.869	2	0.67	NHPQMIAVLVDK	Oxidation@5	MDA_143_FTMSms2hcd	27.663	1	43.7	6.9e-10	1	91840.3	HUMAN	Nuclear cap-binding protein subunit 1
[93]	Q09161	Oxidation	M	719	-	20	28.9	10.09	4.5e-18	463.264	3	1	FIMILTEHLVR	Oxidation@3	MDA_143_FTMSms2hcd	39.631	1	48.8	8.8e-10	1	91840.3	HUMAN	Nuclear cap-binding protein subunit 1
[94]	O14777	Oxidation	M	16	-	29	40.7	8.99	4.9e-16	446.732	2	0.5	LSMQELR	Oxidation@3	MDA_143_FTMSms2hcd	19.274	1	34	0.00017	1	73913.3	HUMAN	Kinetochore protein NDC80 homolog
[94]	O14777	Oxidation	M	314	-	29	40.7	8.99	4.9e-16	705.335	3	1.6	YQAYMSNLESHSAILDQK	Oxidation@5	MDA_143_FTMSms2hcd	29.371	1	42.8	6.7e-10	1	73913.3	HUMAN	Kinetochore protein NDC80 homolog
[94]	O14777	Oxidation	M	554	-	29	40.7	8.99	4.9e-16	857.424	3	2.7	HLLESTVNQGLSEAMNELDAVQR	Oxidation@15	MDA_143_FTMSms2hcd	41.808	1	64	4.9e-16	1	73913.3	HUMAN	Kinetochore protein NDC80 homolog
[94]	O14777	Oxidation	M	588	-	29	40.7	8.99	4.9e-16	510.274	3	1.3	LLEMVATHVGSVEK	Oxidation@4	MDA_143_FTMSms2hcd	28.506	1	49.7	1.9e-10	1	73913.3	HUMAN	Kinetochore protein NDC80 homolog
[95]	P49589	Oxidation	M	227	-	24	36.8	8.16	1.7e-14	849.942	2	2.3	DMEALNVLPPDVLTR	Oxidation@2	MDA_143_FTMSms2hcd	42.721	1	48.6	1.7e-14	1	85474.1	HUMAN	Cysteine--tRNA ligase, cytoplasmic
[95]	P49589	Oxidation	M	435	-	24	36.8	8.16	1.7e-14	383.536	3	0.12	LAFLMHSWK	Oxidation@5	MDA_143_FTMSms2hcd	32.842	1	40.9	1.4e-08	1	85474.1	HUMAN	Cysteine--tRNA ligase, cytoplasmic
[95]	P49589	Oxidation	M	554	-	24	36.8	8.16	1.7e-14	752.086	3	3.1	RPNQALLENIALYLTHMLK	Oxidation@17	MDA_143_FTMSms2hcd	51.451	1	52.6	1.1e-08	1	85474.1	HUMAN	Cysteine--tRNA ligase, cytoplasmic
[95]	P49589	Oxidation	M	690	-	24	36.8	8.16	1.7e-14	629.974	3	1.3	IPPSEMFLSETDKYSK	Oxidation@6	MDA_143_FTMSms2hcd	31.816	1	45.7	2e-09	1	85474.1	HUMAN	Cysteine--tRNA ligase, cytoplasmic
[95]	P49589	Oxidation	M	711	-	24	36.8	8.16	1.7e-14	535.9	3	1	FDENGLPTHDMEGK	Oxidation@11	MDA_143_FTMSms2hcd	23.014	1	30	7.2e-08	1	85474.1	HUMAN	Cysteine--tRNA ligase, cytoplasmic
[96]	P17655	Oxidation	M	326	-	21	34.7	9.21	1.9e-16	692.309	3	2.8	RHEDGEFWMSFSDFLR	Oxidation@9	MDA_143_FTMSms2hcd	45.371	1	45.8	1.6e-11	1	79996	HUMAN	Calpain-2 catalytic subunit
[96]	P17655	Oxidation	M	383	-	21	34.7	9.21	1.9e-16	972.973	2	3.7	NYPNTFWMNPQYLIK	Oxidation@8	MDA_143_FTMSms2hcd	43.711	1	47.5	2.7e-11	1	79996	HUMAN	Calpain-2 catalytic subunit
[96]	P17655	Oxidation	M	422	-	21	34.7	9.21	1.9e-16	848.91	4	1.7	KMGEDMHTIGFGIYEVPEELSGQTNIHLSK	Oxidation@2;Oxidation@6	MDA_143_FTMSms2hcd	41.15	1	41.1	7.3e-11	1	79996	HUMAN	Calpain-2 catalytic subunit
[96]	P17655	Oxidation	M	426	-	21	34.7	9.21	1.9e-16	848.91	4	1.7	KMGEDMHTIGFGIYEVPEELSGQTNIHLSK	Oxidation@2;Oxidation@6	MDA_143_FTMSms2hcd	41.15	1	41.1	7.3e-11	1	79996	HUMAN	Calpain-2 catalytic subunit
[96]	P17655	Oxidation	M	580	-	21	34.7	9.21	1.9e-16	700.308	2	1.3	IMVDMLDSDGSGK	Oxidation@2;Oxidation@5	MDA_143_FTMSms2hcd	25.3	1	57.2	3.6e-15	1	79996	HUMAN	Calpain-2 catalytic subunit
[96]	P17655	Oxidation	M	583	-	21	34.7	9.21	1.9e-16	700.308	2	1.3	IMVDMLDSDGSGK	Oxidation@2;Oxidation@5	MDA_143_FTMSms2hcd	25.3	1	57.2	3.6e-15	1	79996	HUMAN	Calpain-2 catalytic subunit
[96]	P17655	Oxidation	M	622	-	21	34.7	9.21	1.9e-16	604.239	2	-0.23	SGTMNSYEMR	Oxidation@4;Oxidation@9	MDA_143_FTMSms2hcd	14.36	1	39.5	1.9e-16	1	79996	HUMAN	Calpain-2 catalytic subunit
[96]	P17655	Oxidation	M	627	-	21	34.7	9.21	1.9e-16	604.239	2	-0.23	SGTMNSYEMR	Oxidation@4;Oxidation@9	MDA_143_FTMSms2hcd	14.36	1	39.5	1.9e-16	1	79996	HUMAN	Calpain-2 catalytic subunit
[97]	Q4G0J3	Gln->pyro-Glu	Q	41	-	23	38.3	10.79	2.2e-19	780.368	2	1.1	QVDFWFGDANLHK	Gln->pyro-Glu@1	MDA_143_FTMSms2hcd	45.763	1	20.1	0.0003	1	66899.2	HUMAN	La-related protein 7
[97]	Q4G0J3	Oxidation	M	241	-	23	38.3	10.79	2.2e-19	736.315	2	0.29	EENMDTSNTSISK	Oxidation@4	MDA_143_FTMSms2hcd	15.244	1	48.2	3.1e-12	1	66899.2	HUMAN	La-related protein 7
[97]	Q4G0J3	Oxidation	M	415	-	23	38.3	10.79	2.2e-19	979.902	2	0.99	SESEMETDSGVPQNTGMK	Oxidation@5;Oxidation@17	MDA_143_FTMSms2hcd	18.034	1	55.7	2.2e-19	1	66899.2	HUMAN	La-related protein 7
[97]	Q4G0J3	Oxidation	M	427	-	23	38.3	10.79	2.2e-19	979.902	2	0.99	SESEMETDSGVPQNTGMK	Oxidation@5;Oxidation@17	MDA_143_FTMSms2hcd	18.034	1	55.7	2.2e-19	1	66899.2	HUMAN	La-related protein 7
[97]	Q4G0J3	Phospho	T	292	34	23	38.3	10.79	2.2e-19	940.469	2	-4.4	RDRVEASSLPEVRTGK	Phospho@14=34	MDA_143_FTMSms2hcd	51.683	1	17.9	0.0022	1	66899.2	HUMAN	La-related protein 7
[98]	Q96EK5	Oxidation	M	223	-	21	47.5	8.55	3.2e-15	902.442	3	1.7	VYTHNLYYLAQVYQHLEMFEK	Oxidation@18	MDA_143_FTMSms2hcd	48.179	1	58.9	4.9e-14	1	71814.6	HUMAN	KIF-binding protein
[98]	Q96EK5	Oxidation	M	440	-	21	47.5	8.55	3.2e-15	687.325	2	0.98	VLAFFETDMER	Oxidation@9	MDA_143_FTMSms2hcd	37.975	1	49.2	8.5e-15	1	71814.6	HUMAN	KIF-binding protein
[98]	Q96EK5	Oxidation	M	453	-	21	47.5	8.55	3.2e-15	1246.17	2	2.4	IAMLEPLTVDLNPQYYLLVNR	Oxidation@3	MDA_143_FTMSms2hcd	52.359	1	67.7	6.1e-15	1	71814.6	HUMAN	KIF-binding protein
[98]	Q96EK5	Oxidation	M	484	-	21	47.5	8.55	3.2e-15	716.665	3	1.2	QIQFEIAHAYYDMMDLK	Oxidation@13;Oxidation@14	MDA_143_FTMSms2hcd	37.755	1	42.5	2.7e-13	1	71814.6	HUMAN	KIF-binding protein
[98]	Q96EK5	Oxidation	M	485	-	21	47.5	8.55	3.2e-15	716.665	3	1.2	QIQFEIAHAYYDMMDLK	Oxidation@13;Oxidation@14	MDA_143_FTMSms2hcd	37.755	1	42.5	2.7e-13	1	71814.6	HUMAN	KIF-binding protein
[98]	Q96EK5	Oxidation	M	544	-	21	47.5	8.55	3.2e-15	510.276	4	1.6	VFPEHIGEDVLRPAMLAK	Oxidation@15	MDA_143_FTMSms2hcd	35.898	1	39.1	1.6e-08	1	71814.6	HUMAN	KIF-binding protein
[99]	Q6P3X3	Gln->pyro-Glu	Q	804	-	23	29.2	7.59	1.9e-13	727.337	2	2.6	QLFTDVATGEMSR	Gln->pyro-Glu@1;Oxidation@11	MDA_143_FTMSms2hcd	38.878	1	30	1.8e-08	1	96633.3	HUMAN	Tetratricopeptide repeat protein 27
[99]	Q6P3X3	Oxidation	M	1	-	23	29.2	7.59	1.9e-13	623.338	2	2.7	MWTPELAILR	Oxidation@1	MDA_143_FTMSms2hcd	43.497	1	32.4	2.5e-10	1	96633.3	HUMAN	Tetratricopeptide repeat protein 27
[99]	Q6P3X3	Oxidation	M	679	-	23	29.2	7.59	1.9e-13	497.238	2	0.96	AVIDGMTDR	Oxidation@6	MDA_143_FTMSms2hcd	17.571	1	32	3.4e-07	1	96633.3	HUMAN	Tetratricopeptide repeat protein 27
[99]	Q6P3X3	Oxidation	M	787	-	23	29.2	7.59	1.9e-13	762.871	2	1.6	SSSQEAVQMLSSVR	Oxidation@9	MDA_143_FTMSms2hcd	27.97	1	42.5	2e-12	1	96633.3	HUMAN	Tetratricopeptide repeat protein 27
[99]	Q6P3X3	Oxidation	M	814	-	23	29.2	7.59	1.9e-13	727.337	2	2.6	QLFTDVATGEMSR	Gln->pyro-Glu@1;Oxidation@11	MDA_143_FTMSms2hcd	38.878	1	30	1.8e-08	1	96633.3	HUMAN	Tetratricopeptide repeat protein 27
[99]	Q6P3X3	Oxidation	M	825	-	23	29.2	7.59	1.9e-13	918.779	3	3.2	ELADDITAMDTLVTELQDLSNQFR	Oxidation@9	MDA_143_FTMSms2hcd	56.287	1	43.6	5.8e-12	1	96633.3	HUMAN	Tetratricopeptide repeat protein 27
[100]	O75694	Met-loss	M	1	-	23	21.3	7.35	5.4e-13	867.439	3	1.8	MPSSLLGAAMPASTSAAALQEALENAGR	Met-loss@1;Oxidation@10	MDA_143_FTMSms2hcd	47.223	1	52.9	1.1e-12	1	155201	HUMAN	Nuclear pore complex protein Nup155
[100]	O75694	Oxidation	M	10	-	23	21.3	7.35	5.4e-13	867.439	3	1.8	MPSSLLGAAMPASTSAAALQEALENAGR	Met-loss@1;Oxidation@10	MDA_143_FTMSms2hcd	47.223	1	52.9	1.1e-12	1	155201	HUMAN	Nuclear pore complex protein Nup155
[100]	O75694	Oxidation	M	312	-	23	21.3	7.35	5.4e-13	919.94	2	1.6	GVIQVYDLGQDGQGMSR	Oxidation@15	MDA_143_FTMSms2hcd	33.862	1	42	1.7e-12	1	155201	HUMAN	Nuclear pore complex protein Nup155
[100]	O75694	Oxidation	M	1183	-	23	21.3	7.35	5.4e-13	684.323	4	2.4	QYSHHSSVQDAVSQLDSELMDITK	Oxidation@20	MDA_143_FTMSms2hcd	44.551	1	31.1	4.7e-08	1	155201	HUMAN	Nuclear pore complex protein Nup155
[100]	O75694	Oxidation	M	1241	-	23	21.3	7.35	5.4e-13	408.226	2	-0.32	MHALSLK	Oxidation@1	MDA_143_FTMSms2hcd	18.568	1	25.6	1.1e-05	1	155201	HUMAN	Nuclear pore complex protein Nup155
[101]	Q6IN85	Oxidation	M	360	-	24	31.1	8.37	6.8e-15	840.104	3	3.2	TLSNMGILPALEVILGMDDTQVR	Oxidation@5;Oxidation@17	MDA_143_FTMSms2hcd	57.096	1	55.9	3.5e-11	1	95369.1	HUMAN	Serine/threonine-protein phosphatase 4 regulatory subunit 3A
[101]	Q6IN85	Oxidation	M	372	-	24	31.1	8.37	6.8e-15	840.104	3	3.2	TLSNMGILPALEVILGMDDTQVR	Oxidation@5;Oxidation@17	MDA_143_FTMSms2hcd	57.096	1	55.9	3.5e-11	1	95369.1	HUMAN	Serine/threonine-protein phosphatase 4 regulatory subunit 3A
[101]	Q6IN85	Oxidation	M	395	-	24	31.1	8.37	6.8e-15	1090.03	2	3.7	SAATDIFSYLVEYNPSMVR	Oxidation@17	MDA_143_FTMSms2hcd	51.976	1	64	7.8e-14	1	95369.1	HUMAN	Serine/threonine-protein phosphatase 4 regulatory subunit 3A
[101]	Q6IN85	Oxidation	M	597	-	24	31.1	8.37	6.8e-15	1011.99	2	2.3	YNLMNSAIIEMFEFIR	Oxidation@4;Oxidation@11	MDA_143_FTMSms2hcd	49.565	1	58.3	6.8e-15	1	95369.1	HUMAN	Serine/threonine-protein phosphatase 4 regulatory subunit 3A
[101]	Q6IN85	Oxidation	M	604	-	24	31.1	8.37	6.8e-15	1011.99	2	2.3	YNLMNSAIIEMFEFIR	Oxidation@4;Oxidation@11	MDA_143_FTMSms2hcd	49.565	1	58.3	6.8e-15	1	95369.1	HUMAN	Serine/threonine-protein phosphatase 4 regulatory subunit 3A
[101]	Q6IN85	Oxidation	M	710	-	24	31.1	8.37	6.8e-15	639.78	2	0.23	NDDDIMDPISK	Oxidation@6	MDA_143_FTMSms2hcd	24.719	1	38.9	1.2e-08	1	95369.1	HUMAN	Serine/threonine-protein phosphatase 4 regulatory subunit 3A
[101-1]	Q5MIZ7	Oxidation	M	372	-	17	23.1	8.79	1.1e-15	705.713	3	2.9	LGILPALEIVMGMDDLQVR	Oxidation@11;Oxidation@13	MDA_143_FTMSms2hcd	52.771	1	48.6	3.4e-13	1	97459.1	HUMAN	Serine/threonine-protein phosphatase 4 regulatory subunit 3B
[101-1]	Q5MIZ7	Oxidation	M	374	-	17	23.1	8.79	1.1e-15	705.713	3	2.9	LGILPALEIVMGMDDLQVR	Oxidation@11;Oxidation@13	MDA_143_FTMSms2hcd	52.771	1	48.6	3.4e-13	1	97459.1	HUMAN	Serine/threonine-protein phosphatase 4 regulatory subunit 3B
[101-1]	Q5MIZ7	Oxidation	M	397	-	17	23.1	8.79	1.1e-15	1068.52	2	2.4	SAATDIFSYLVEFSPSMVR	Oxidation@17	MDA_143_FTMSms2hcd	55.882	1	64	1.1e-15	1	97459.1	HUMAN	Serine/threonine-protein phosphatase 4 regulatory subunit 3B
[102]	Q8WUM4	Met-loss+Acetyl	M	1	68	25	31.6	7.12	1.4e-12	588.853	2	0.032	MATFISVQLKK	Met-loss+Acetyl@1=68	MDA_143_FTMSms2hcd	39.053	1	29.5	2e-07	1	96024	HUMAN	Programmed cell death 6-interacting protein
[102]	Q8WUM4	Oxidation	M	358	-	25	31.6	7.12	1.4e-12	903.965	2	3.4	MVPVSVQQSLAAYNQR	Oxidation@1	MDA_143_FTMSms2hcd	34.406	1	43.9	1.7e-11	1	96024	HUMAN	Programmed cell death 6-interacting protein
[103]	Q6PJG6	Oxidation	M	569	-	20	34.5	8.88	7.8e-16	680.833	4	2.2	ASAVTAMGQLSSQGLHAPTSPEHAEAR	Oxidation@7	MDA_143_FTMSms2hcd	26.739	1	72	2.3e-13	1	88119.9	HUMAN	BRCA1-associated ATM activator 1
[103]	Q6PJG6	Oxidation	M	613	-	20	34.5	8.88	7.8e-16	698.359	2	1.1	AVMQVFTEWLR	Oxidation@3	MDA_143_FTMSms2hcd	43.969	1	38	2.9e-07	1	88119.9	HUMAN	BRCA1-associated ATM activator 1
[103]	Q6PJG6	Oxidation	M	775	-	20	34.5	8.88	7.8e-16	741.697	3	1.8	AGEQAQPPGDQEPEAVLAMLR	Oxidation@19	MDA_143_FTMSms2hcd	40.356	1	46.5	2.9e-14	1	88119.9	HUMAN	BRCA1-associated ATM activator 1
[104]	Q6IA86	Gln->pyro-Glu	Q	606	-	23	31	7.83	6.9e-14	834.425	3	4.4	QVQNLVFHSLTVTQMAFSPNEK	Gln->pyro-Glu@1	MDA_143_FTMSms2hcd	52.933	1	34.2	4e-08	1	92500.9	HUMAN	Elongator complex protein 2
[104]	Q6IA86	Oxidation	M	316	-	23	31	7.83	6.9e-14	1138.06	2	2.5	TMILWAPDEESGVWLEQVR	Oxidation@2	MDA_143_FTMSms2hcd	47.298	1	58.6	1.4e-11	1	92500.9	HUMAN	Elongator complex protein 2
[104]	Q6IA86	Oxidation	M	620	-	23	31	7.83	6.9e-14	845.43	3	2.3	QVQNLVFHSLTVTQMAFSPNEK	Oxidation@15	MDA_143_FTMSms2hcd	42.093	1	35.9	1.4e-08	1	92500.9	HUMAN	Elongator complex protein 2
[105]	Q2NL82	Gln->pyro-Glu	Q	575	-	22	27.4	7.9	5.1e-14	881.482	2	1.7	QGTPLIAFSLLPHEQK	Gln->pyro-Glu@1	MDA_143_FTMSms2hcd	50.493	1	46.1	1.1e-11	1	91810.8	HUMAN	Pre-rRNA-processing protein TSR1 homolog
[105]	Q2NL82	Oxidation	M	231	-	22	27.4	7.9	5.1e-14	865.483	2	3.8	LLLLDTQQEAGMLLR	Oxidation@12	MDA_143_FTMSms2hcd	44.627	1	54.2	2.7e-11	1	91810.8	HUMAN	Pre-rRNA-processing protein TSR1 homolog
[105]	Q2NL82	Oxidation	M	299	-	22	27.4	7.9	5.1e-14	512.935	3	1.6	LLHIVGYGDFQMK	Oxidation@12	MDA_143_FTMSms2hcd	34.681	1	36.9	6.2e-11	1	91810.8	HUMAN	Pre-rRNA-processing protein TSR1 homolog
[105]	Q2NL82	Oxidation	M	483	-	22	27.4	7.9	5.1e-14	797.359	2	0.76	LEEMFPDEVDTPR	Oxidation@4	MDA_143_FTMSms2hcd	31.371	1	55	1.6e-13	1	91810.8	HUMAN	Pre-rRNA-processing protein TSR1 homolog
[105]	Q2NL82	Oxidation	M	716	-	22	27.4	7.9	5.1e-14	447.203	2	0.55	YMFFNR	Oxidation@2	MDA_143_FTMSms2hcd	29.403	1	16.6	0.00091	1	91810.8	HUMAN	Pre-rRNA-processing protein TSR1 homolog
[105]	Q2NL82	Oxidation	M	751	-	22	27.4	7.9	5.1e-14	429.23	4	0.47	RGHIKEPLGTHGHMK	Oxidation@14	MDA_143_FTMSms2hcd	12.963	1	31.6	1.8e-09	1	91810.8	HUMAN	Pre-rRNA-processing protein TSR1 homolog
[105]	Q2NL82	Oxidation	M	767	-	22	27.4	7.9	5.1e-14	664.333	2	1.9	SQDTVLMNLYK	Oxidation@7	MDA_143_FTMSms2hcd	33.136	1	27.7	2.4e-07	1	91810.8	HUMAN	Pre-rRNA-processing protein TSR1 homolog
[105]	Q2NL82	Oxidation	M	803	-	22	27.4	7.9	5.1e-14	669.299	2	1.2	SEISSTVPQGGME	Oxidation@12	MDA_143_FTMSms2hcd	24.235	1	23.7	3.1e-07	1	91810.8	HUMAN	Pre-rRNA-processing protein TSR1 homolog
[106]	Q9NXH9	Oxidation	M	215	-	22	37.2	7.67	1.3e-13	380.176	3	-0.32	MLMYQHQR	Oxidation@1;Oxidation@3	MDA_143_FTMSms2hcd	15.212	1	24.6	1.7e-05	1	72234.7	HUMAN	tRNA (guanine(26)-N(2))-dimethyltransferase
[106]	Q9NXH9	Oxidation	M	217	-	22	37.2	7.67	1.3e-13	380.176	3	-0.32	MLMYQHQR	Oxidation@1;Oxidation@3	MDA_143_FTMSms2hcd	15.212	1	24.6	1.7e-05	1	72234.7	HUMAN	tRNA (guanine(26)-N(2))-dimethyltransferase
[106]	Q9NXH9	Oxidation	M	280	-	22	37.2	7.67	1.3e-13	385.199	2	0.047	YGAMALK	Oxidation@4	MDA_143_FTMSms2hcd	18.36	1	24.6	1.7e-07	1	72234.7	HUMAN	tRNA (guanine(26)-N(2))-dimethyltransferase
[106]	Q9NXH9	Oxidation	M	397	-	22	37.2	7.67	1.3e-13	573.532	4	1.7	HQLGGPMWAEPIHDLDFVGR	Oxidation@7	MDA_143_FTMSms2hcd	40.572	1	57.5	5e-11	1	72234.7	HUMAN	tRNA (guanine(26)-N(2))-dimethyltransferase
[106]	Q9NXH9	Oxidation	M	499	-	22	37.2	7.67	1.3e-13	731.855	2	2.3	TDAPASALWDIMR	Oxidation@12	MDA_143_FTMSms2hcd	38.338	1	59.6	1.3e-13	1	72234.7	HUMAN	tRNA (guanine(26)-N(2))-dimethyltransferase
[107]	Q04446	Gln->pyro-Glu	Q	566	-	23	35.2	7.3	6.4e-13	678.334	2	1.6	QFHLTDDDLLR	Gln->pyro-Glu@1	MDA_143_FTMSms2hcd	41.238	1	35	1.2e-09	1	80474.6	HUMAN	1,4-alpha-glucan-branching enzyme
[107]	Q04446	Met-loss+Acetyl	M	1	-	23	35.2	7.3	6.4e-13	1018.18	3	2.9	MAAPMTPAARPEDYEAALNAALADVPELAR	Met-loss+Acetyl@1;Oxidation@5	MDA_143_FTMSms2hcd	52.624	1	50.4	2e-11	1	80474.6	HUMAN	1,4-alpha-glucan-branching enzyme
[107]	Q04446	Oxidation	M	5	-	23	35.2	7.3	6.4e-13	1018.18	3	2.9	MAAPMTPAARPEDYEAALNAALADVPELAR	Met-loss+Acetyl@1;Oxidation@5	MDA_143_FTMSms2hcd	52.624	1	50.4	2e-11	1	80474.6	HUMAN	1,4-alpha-glucan-branching enzyme
[107]	Q04446	Oxidation	M	437	-	23	35.2	7.3	6.4e-13	437.739	2	0.98	LAMAIPDK	Oxidation@3	MDA_143_FTMSms2hcd	21.854	1	29.3	6e-06	1	80474.6	HUMAN	1,4-alpha-glucan-branching enzyme
[107]	Q04446	Oxidation	M	539	-	23	35.2	7.3	6.4e-13	830.648	4	1.9	LITHGLGGEGYLNFMGNEFGHPEWLDFPR	Oxidation@15	MDA_143_FTMSms2hcd	46.71	1	47.5	2.3e-12	1	80474.6	HUMAN	1,4-alpha-glucan-branching enzyme
[108]	P53992	Oxidation	M	608	-	20	21.8	8	3.3e-14	679.351	3	0.92	AVITSLLDQIPEMFADTR	Oxidation@13	MDA_143_FTMSms2hcd	51.231	1	48.8	2.3e-12	1	118326	HUMAN	Protein transport protein Sec24C
[108]	P53992	Oxidation	M	627	-	20	21.8	8	3.3e-14	660.013	3	2.5	ETETVFVPVIQAGMEALK	Oxidation@14	MDA_143_FTMSms2hcd	46.554	1	39.5	7.4e-11	1	118326	HUMAN	Protein transport protein Sec24C
[108]	P53992	Oxidation	M	753	-	20	21.8	8	3.3e-14	505.261	2	1.2	VVGFDAVMR	Oxidation@8	MDA_143_FTMSms2hcd	28.496	1	35	2.3e-09	1	118326	HUMAN	Protein transport protein Sec24C
[109]	Q9NQX3	Met-loss+Acetyl	M	1	-	20	30.8	7.86	5.9e-14	598.625	3	0.47	MATEGMILTNHDHQIR	Met-loss+Acetyl@1;Oxidation@6	MDA_143_FTMSms2hcd	27.36	1	63	7.9e-12	1	79749.1	HUMAN	Gephyrin
[109]	Q9NQX3	Oxidation	M	6	-	20	30.8	7.86	5.9e-14	598.625	3	0.47	MATEGMILTNHDHQIR	Met-loss+Acetyl@1;Oxidation@6	MDA_143_FTMSms2hcd	27.36	1	63	7.9e-12	1	79749.1	HUMAN	Gephyrin
[109]	Q9NQX3	Oxidation	M	318	-	20	30.8	7.86	5.9e-14	643.295	2	1.6	MSPFPLTSMDK	Oxidation@1;Oxidation@9	MDA_143_FTMSms2hcd	30.28	1	29.4	3.6e-08	1	79749.1	HUMAN	Gephyrin
[109]	Q9NQX3	Oxidation	M	326	-	20	30.8	7.86	5.9e-14	643.295	2	1.6	MSPFPLTSMDK	Oxidation@1;Oxidation@9	MDA_143_FTMSms2hcd	30.28	1	29.4	3.6e-08	1	79749.1	HUMAN	Gephyrin
[109]	Q9NQX3	Oxidation	M	336	-	20	30.8	7.86	5.9e-14	1148.62	2	3.1	AFITVLEMTPVLGTEIINYR	Oxidation@8	MDA_143_FTMSms2hcd	53.005	1	69.5	1.2e-13	1	79749.1	HUMAN	Gephyrin
[109]	Q9NQX3	Oxidation	M	404	-	20	30.8	7.86	5.9e-14	846.08	3	2.7	FIIGESQAGEQPTQTVMPGQVMR	Oxidation@17;Oxidation@22	MDA_143_FTMSms2hcd	33.809	1	59.8	6.7e-11	1	79749.1	HUMAN	Gephyrin
[109]	Q9NQX3	Oxidation	M	409	-	20	30.8	7.86	5.9e-14	846.08	3	2.7	FIIGESQAGEQPTQTVMPGQVMR	Oxidation@17;Oxidation@22	MDA_143_FTMSms2hcd	33.809	1	59.8	6.7e-11	1	79749.1	HUMAN	Gephyrin
[109]	Q9NQX3	Oxidation	M	576	-	20	30.8	7.86	5.9e-14	740.372	2	0.8	ADVIITSGGVSMGEK	Oxidation@12	MDA_143_FTMSms2hcd	27.343	1	56.6	9.9e-13	1	79749.1	HUMAN	Gephyrin
[109]	Q9NQX3	Oxidation	M	601	-	20	30.8	7.86	5.9e-14	732.059	3	2	VFMKPGLPTTFATLDIDGVR	Oxidation@3	MDA_143_FTMSms2hcd	43.638	1	34.5	1.6e-07	1	79749.1	HUMAN	Gephyrin
[109]	Q9NQX3	Oxidation	M	646	-	20	30.8	7.86	5.9e-14	499.954	3	1.3	MQGILDPRPTIIK	Oxidation@1	MDA_143_FTMSms2hcd	31.977	1	27.5	6e-09	1	79749.1	HUMAN	Gephyrin
[110]	O75534	Oxidation	M	177	-	23	32.3	6.95	2.9e-12	374.225	2	0.001	NIMLLK	Oxidation@3	MDA_143_FTMSms2hcd	28.486	1	16.9	0.0033	1	88885.4	HUMAN	Cold shock domain-containing protein E1
[110]	O75534	Oxidation	M	350	-	23	32.3	6.95	2.9e-12	505.244	2	0.8	EMGVIAAMR	Oxidation@2;Oxidation@8	MDA_143_FTMSms2hcd	19.587	1	29.4	2.6e-08	1	88885.4	HUMAN	Cold shock domain-containing protein E1
[110]	O75534	Oxidation	M	356	-	23	32.3	6.95	2.9e-12	505.244	2	0.8	EMGVIAAMR	Oxidation@2;Oxidation@8	MDA_143_FTMSms2hcd	19.587	1	29.4	2.6e-08	1	88885.4	HUMAN	Cold shock domain-containing protein E1
[110]	O75534	Oxidation	M	771	-	23	32.3	6.95	2.9e-12	324.199	2	-0.26	LMVLR	Oxidation@2	MDA_143_FTMSms2hcd	23.478	1	19.1	0.0026	1	88885.4	HUMAN	Cold shock domain-containing protein E1
[110]	O75534	Oxidation	M	783	-	23	32.3	6.95	2.9e-12	627.265	2	1.3	GPDNSMGFGAER	Oxidation@6	MDA_143_FTMSms2hcd	19.427	1	46.9	4.3e-12	1	88885.4	HUMAN	Cold shock domain-containing protein E1
[111]	Q15642	Oxidation	M	182	-	18	41.1	9.08	3.3e-16	669.979	3	1.6	SHMAEESKNEYAAQLQR	Oxidation@3	MDA_143_FTMSms2hcd	20.234	1	57.7	7.2e-15	1	68352.8	HUMAN	Cdc42-interacting protein 4
[111]	Q15642	Oxidation	M	209	-	18	41.1	9.08	3.3e-16	673.31	3	2.2	DQAHFYFSQMPQIFDK	Oxidation@10	MDA_143_FTMSms2hcd	38.44	1	40.2	6.8e-09	1	68352.8	HUMAN	Cdc42-interacting protein 4
[111]	Q15642	Oxidation	M	291	-	18	41.1	9.08	3.3e-16	768.013	3	1.8	SGFARPGDVEFEDFSQPMNR	Oxidation@18	MDA_143_FTMSms2hcd	34.498	1	49.6	4.2e-13	1	68352.8	HUMAN	Cdc42-interacting protein 4
[111]	Q15642	Oxidation	M	437	-	18	41.1	9.08	3.3e-16	1257.12	2	3.5	TPQMGDPASLEPQIAETLSNIER	Oxidation@4	MDA_143_FTMSms2hcd	47.06	1	69.4	3.3e-16	1	68352.8	HUMAN	Cdc42-interacting protein 4
[111]	Q15642	Phospho	S	296	18	18	41.1	9.08	3.3e-16	641.294	3	1.8	APSDSSLGTPSDGRPELR	Phospho@3=18	MDA_143_FTMSms2hcd	26.181	1	48.7	2.1e-11	1	68352.8	HUMAN	Cdc42-interacting protein 4
[112]	P23588	Oxidation	M	474	-	21	37	7.37	4.7e-13	426.736	2	-0.074	VMPAPPPK	Oxidation@2	MDA_143_FTMSms2hcd	16.973	1	33	3.6e-09	1	69151.7	HUMAN	Eukaryotic translation initiation factor 4B
[112]	P23588	Oxidation	M	533	-	21	37	7.37	4.7e-13	487.904	3	-0.87	KDENKVDGMNAPK	Oxidation@9	MDA_143_FTMSms2hcd	12.879	1	44.6	1.8e-09	1	69151.7	HUMAN	Eukaryotic translation initiation factor 4B
[112]	P23588	Phospho	S	406	-	21	37	7.37	4.7e-13	349.822	3	-1.4	ERHPSWR	Phospho@5	MDA_143_FTMSms2hcd	15.366	1	25.2	0.0018	1	69151.7	HUMAN	Eukaryotic translation initiation factor 4B
[113]	P41252	Oxidation	M	769	-	19	20.4	8.19	1.4e-14	735.706	3	2.9	LMAPYTPFLTELMYQNLK	Oxidation@2;Oxidation@13	MDA_143_FTMSms2hcd	49.317	1	46.3	4.3e-14	1	144499	HUMAN	Isoleucine--tRNA ligase, cytoplasmic
[113]	P41252	Oxidation	M	780	-	19	20.4	8.19	1.4e-14	735.706	3	2.9	LMAPYTPFLTELMYQNLK	Oxidation@2;Oxidation@13	MDA_143_FTMSms2hcd	49.317	1	46.3	4.3e-14	1	144499	HUMAN	Isoleucine--tRNA ligase, cytoplasmic
[113]	P41252	Oxidation	M	805	-	19	20.4	8.19	1.4e-14	667.867	4	3	VLIDPVSVQDKDTLSIHYLMLPR	Oxidation@20	MDA_143_FTMSms2hcd	43.499	1	65.8	2.1e-13	1	144499	HUMAN	Isoleucine--tRNA ligase, cytoplasmic
[114]	Q96S55	Oxidation	M	422	-	20	34.4	7.73	1.1e-13	771.777	5	2	AINSLGIHVLDSSRPTDPLSHSSNSSSEPAMFIEDK	Oxidation@31	MDA_143_FTMSms2hcd	38.357	1	40.8	6.6e-10	1	72133.6	HUMAN	ATPase WRNIP1
[114]	Q96S55	Oxidation	M	640	-	20	34.4	7.73	1.1e-13	1194.54	2	2	YNPMYSEPVDQEYLPEELR	Oxidation@4	MDA_143_FTMSms2hcd	38.893	1	53.6	5.8e-13	1	72133.6	HUMAN	ATPase WRNIP1
[114]	Q96S55	Phospho	S	65	-	20	34.4	7.73	1.1e-13	495.244	2	-0.05	AKGPSPPGAK	Phospho@5	MDA_143_FTMSms2hcd	15.171	1	33.7	1.1e-09	1	72133.6	HUMAN	ATPase WRNIP1
[114]	Q96S55	Phospho	S	75	20	20	34.4	7.73	1.1e-13	535.766	2	1.3	RLSESSALK	Phospho@3=20	MDA_143_FTMSms2hcd	20.328	1	33.7	5.9e-08	1	72133.6	HUMAN	ATPase WRNIP1
[114]	Q96S55	Phospho	S	153	20	20	34.4	7.73	1.1e-13	445.217	3	-0.37	RPAAAAAAGSASPR	Phospho@12=20	MDA_143_FTMSms2hcd	15.56	1	53.2	1.1e-13	1	72133.6	HUMAN	ATPase WRNIP1
[115]	Q8TC07	Gln->pyro-Glu	Q	378	-	21	30.1	8.53	3.4e-15	535.252	2	1.3	QKTDEYFR	Gln->pyro-Glu@1	MDA_143_FTMSms2hcd	23.774	1	26.9	1.3e-08	1	79491.4	HUMAN	TBC1 domain family member 15
[115]	Q8TC07	Met-loss+Acetyl	M	1	-	21	30.1	8.53	3.4e-15	401.226	2	-0.96	MAAAGVVSGK	Met-loss+Acetyl@1	MDA_143_FTMSms2hcd	23.221	1	21.8	0.00015	1	79491.4	HUMAN	TBC1 domain family member 15
[115]	Q8TC07	Oxidation	M	100	-	21	30.1	8.53	3.4e-15	820.367	3	1.6	GSEHLNSYEAEWDMVNTVSFK	Oxidation@14	MDA_143_FTMSms2hcd	37.961	1	46.5	1.5e-14	1	79491.4	HUMAN	TBC1 domain family member 15
[115]	Q8TC07	Oxidation	M	247	-	21	30.1	8.53	3.4e-15	673.82	2	2.9	DPYTATMIGFSK	Oxidation@7	MDA_143_FTMSms2hcd	31.201	1	39.5	4.2e-09	1	79491.4	HUMAN	TBC1 domain family member 15
[115]	Q8TC07	Oxidation	M	276	-	21	30.1	8.53	3.4e-15	923.779	3	3	GSDPSTHQRPPSEMADFLSDAIPGLK	Oxidation@14	MDA_143_FTMSms2hcd	38.871	1	50.6	3.4e-15	1	79491.4	HUMAN	TBC1 domain family member 15
[115]	Q8TC07	Oxidation	M	338	-	21	30.1	8.53	3.4e-15	481.753	2	0.81	ILNVDNMK	Oxidation@7	MDA_143_FTMSms2hcd	21.46	1	34.9	7.4e-08	1	79491.4	HUMAN	TBC1 domain family member 15
[115]	Q8TC07	Oxidation	M	341	-	21	30.1	8.53	3.4e-15	355.686	2	-0.12	QMIFR	Oxidation@2	MDA_143_FTMSms2hcd	20.811	1	16.8	0.0018	1	79491.4	HUMAN	TBC1 domain family member 15
[115]	Q8TC07	Oxidation	M	614	-	21	30.1	8.53	3.4e-15	553.301	2	1.4	AEAISLQMVK	Oxidation@8	MDA_143_FTMSms2hcd	27.805	1	39.8	1.3e-08	1	79491.4	HUMAN	TBC1 domain family member 15
[115-1]	Q9HA65	Oxidation	M	560	-	6	9.3	5.99	1.3e-10	501.258	2	0.88	HINELTMK	Oxidation@7	MDA_143_FTMSms2hcd	16.236	1	32.6	1.1e-08	1	72728.9	HUMAN	TBC1 domain family member 17
[116]	P35222	Oxidation	M	131	-	22	25.5	9.14	2.5e-16	516.774	2	1.1	LAEPSQMLK	Oxidation@7	MDA_143_FTMSms2hcd	21.959	2	27.8	0.00014	1	85497.4	HUMAN	Catenin beta-1
[116]	P35222	Oxidation	M	174	-	22	25.5	9.14	2.5e-16	550.301	2	0.98	AAVMVHQLSK	Oxidation@4	MDA_143_FTMSms2hcd	19.237	1	54.5	1.4e-09	1	85497.4	HUMAN	Catenin beta-1
[116]	P35222	Oxidation	M	194	-	22	25.5	9.14	2.5e-16	552.298	2	0.7	SPQMVSAIVR	Oxidation@4	MDA_143_FTMSms2hcd	25.246	1	45.6	4.2e-10	1	85497.4	HUMAN	Catenin beta-1
[116]	P35222	Oxidation	M	202	-	22	25.5	9.14	2.5e-16	698.312	2	0.32	TMQNTNDVETAR	Oxidation@2	MDA_143_FTMSms2hcd	15.469	1	48.7	4.5e-12	1	85497.4	HUMAN	Catenin beta-1
[116]	P35222	Oxidation	M	282	-	22	25.5	9.14	2.5e-16	402.736	2	-0.078	MVALLNK	Oxidation@1	MDA_143_FTMSms2hcd	24.475	1	23.6	8.4e-05	1	85497.4	HUMAN	Catenin beta-1
[116]	P35222	Oxidation	M	328	-	22	25.5	9.14	2.5e-16	891.521	2	1.9	LIILASGGPQALVNIMR	Oxidation@16	MDA_143_FTMSms2hcd	45.181	1	70	2.5e-16	1	85497.4	HUMAN	Catenin beta-1
[116]	P35222	Oxidation	M	480	-	22	25.5	9.14	2.5e-16	700.322	2	-0.55	HQEAEMAQNAVR	Oxidation@6	MDA_143_FTMSms2hcd	14.704	1	52.6	9.1e-13	1	85497.4	HUMAN	Catenin beta-1
[116]	P35222	Oxidation	M	662	-	22	25.5	9.14	2.5e-16	628.777	2	-0.33	MSEDKPQDYK	Oxidation@1	MDA_143_FTMSms2hcd	14.028	1	42.7	2.8e-10	1	85497.4	HUMAN	Catenin beta-1
[116-1]	P14923	Oxidation	M	180	-	18	25.1	8.16	1.7e-14	714.407	2	1.4	ALMGSPQLVAAVVR	Oxidation@3	MDA_143_FTMSms2hcd	37.981	1	45.9	1.4e-10	1	81745.5	HUMAN	Junction plakoglobin
[116-1]	P14923	Oxidation	M	193	-	18	25.1	8.16	1.7e-14	684.807	2	0.98	TMQNTSDLDTAR	Oxidation@2	MDA_143_FTMSms2hcd	17.789	1	38.4	1.1e-10	1	81745.5	HUMAN	Junction plakoglobin
[116-1]	P14923	Oxidation	M	273	-	18	25.1	8.16	1.7e-14	415.744	2	1.3	MVPLLNK	Oxidation@1	MDA_143_FTMSms2hcd	26.363	1	18.5	0.0028	1	81745.5	HUMAN	Junction plakoglobin
[116-1]	P14923	Oxidation	M	471	-	18	25.1	8.16	1.7e-14	692.817	2	-0.19	HPEAEMAQNSVR	Oxidation@6	MDA_143_FTMSms2hcd	14.602	1	53.1	3.5e-12	1	81745.5	HUMAN	Junction plakoglobin
[116-1]	P14923	Oxidation	M	578	-	18	25.1	8.16	1.7e-14	356.178	2	0.42	MEIFR	Oxidation@1	MDA_143_FTMSms2hcd	21.626	1	17.4	0.014	1	81745.5	HUMAN	Junction plakoglobin
[117]	Q9Y223	Oxidation	M	29	-	21	30.5	7.85	6.1e-14	503.294	2	0.57	LAPIMFGIK	Oxidation@5	MDA_143_FTMSms2hcd	37.98	1	33.7	1.7e-06	1	79275.4	HUMAN	Bifunctional UDP-N-acetylglucosamine 2-epimerase/N-acetylmannosamine kinase
[117]	Q9Y223	Oxidation	M	60	-	21	30.5	7.85	6.1e-14	756.837	2	2.1	MIEQDDFDINTR	Oxidation@1	MDA_143_FTMSms2hcd	29.69	1	38.5	4.3e-09	1	79275.4	HUMAN	Bifunctional UDP-N-acetylglucosamine 2-epimerase/N-acetylmannosamine kinase
[117]	Q9Y223	Oxidation	M	84	-	21	30.5	7.85	6.1e-14	867.436	2	1.7	GEDEAAMVESVGLALVK	Oxidation@7	MDA_143_FTMSms2hcd	42.891	1	52.6	6.1e-14	1	79275.4	HUMAN	Bifunctional UDP-N-acetylglucosamine 2-epimerase/N-acetylmannosamine kinase
[117]	Q9Y223	Oxidation	M	107	-	21	30.5	7.85	6.1e-14	617.734	5	2.3	LKPDIMIVHGDRFDALALATSAALMNIR	Oxidation@6;Oxidation@25	MDA_143_FTMSms2hcd	47.862	1	27.6	9.7e-06	1	79275.4	HUMAN	Bifunctional UDP-N-acetylglucosamine 2-epimerase/N-acetylmannosamine kinase
[117]	Q9Y223	Oxidation	M	126	-	21	30.5	7.85	6.1e-14	617.734	5	2.3	LKPDIMIVHGDRFDALALATSAALMNIR	Oxidation@6;Oxidation@25	MDA_143_FTMSms2hcd	47.862	1	27.6	9.7e-06	1	79275.4	HUMAN	Bifunctional UDP-N-acetylglucosamine 2-epimerase/N-acetylmannosamine kinase
[117]	Q9Y223	Oxidation	M	203	-	21	30.5	7.85	6.1e-14	490.233	2	2.4	MWLGDDVK	Oxidation@1	MDA_143_FTMSms2hcd	27.871	1	15.2	8e-05	1	79275.4	HUMAN	Bifunctional UDP-N-acetylglucosamine 2-epimerase/N-acetylmannosamine kinase
[117]	Q9Y223	Oxidation	M	614	-	21	30.5	7.85	6.1e-14	485.511	4	0.87	KLHDEDLLLVEGMSVPK	Oxidation@13	MDA_143_FTMSms2hcd	33.786	1	34.9	8.6e-07	1	79275.4	HUMAN	Bifunctional UDP-N-acetylglucosamine 2-epimerase/N-acetylmannosamine kinase
[118]	P07437	Oxidation	M	73	-	16	49.3	8.11	2.1e-14	816.42	2	0.87	AILVDLEPGTMDSVR	Oxidation@11	MDA_143_FTMSms2hcd	37.329	1	41.8	2.7e-10	4	49671.3	HUMAN	Tubulin beta chain
[118]	P07437	Oxidation	M	164	-	16	49.3	8.11	2.1e-14	668.353	2	1.2	IMNTFSVVPSPK	Oxidation@2	MDA_143_FTMSms2hcd	32.645	1	33.8	1.2e-08	4	49671.3	HUMAN	Tubulin beta chain
[118]	P07437	Oxidation	M	257	-	16	49.3	8.11	2.1e-14	580.319	2	1.6	LAVNMVPFPR	Oxidation@5	MDA_143_FTMSms2hcd	35.674	1	40.4	1.1e-08	8	49671.3	HUMAN	Tubulin beta chain
[118]	P07437	Oxidation	M	267	-	16	49.3	8.11	2.1e-14	818.921	2	2.2	LHFFMPGFAPLTSR	Oxidation@5	MDA_143_FTMSms2hcd	41.604	1	46	1.6e-10	7	49671.3	HUMAN	Tubulin beta chain
[118]	P07437	Oxidation	M	330	-	16	49.3	8.11	2.1e-14	731.847	2	2.4	EVDEQMLNVQNK	Oxidation@6	MDA_143_FTMSms2hcd	22.582	1	42.5	1.9e-10	4	49671.3	HUMAN	Tubulin beta chain
[118]	P07437	Oxidation	M	363	-	16	49.3	8.11	2.1e-14	943.493	2	2.9	MAVTFIGNSTAIQELFK	Oxidation@1	MDA_143_FTMSms2hcd	49.051	1	55.8	1.7e-13	1	49671.3	HUMAN	Tubulin beta chain
[118]	P07437	Oxidation	M	388	-	16	49.3	8.11	2.1e-14	623.301	2	0.71	ISEQFTAMFR	Oxidation@8	MDA_143_FTMSms2hcd	32.06	2	49.5	4.8e-11	6	49671.3	HUMAN	Tubulin beta chain
[118-1]	P68371	Oxidation	M	73	-	15	43.1	7.43	3.7e-13	809.413	2	2.4	AVLVDLEPGTMDSVR	Oxidation@11	MDA_143_FTMSms2hcd	35.546	1	47.5	8.1e-11	3	49831.5	HUMAN	Tubulin beta-4B chain
[118-1]	P68371	Oxidation	M	164	-	15	43.1	7.43	3.7e-13	668.353	2	1.2	IMNTFSVVPSPK	Oxidation@2	MDA_143_FTMSms2hcd	32.645	1	33.8	1.2e-08	4	49831.5	HUMAN	Tubulin beta-4B chain
[118-1]	P68371	Oxidation	M	257	-	15	43.1	7.43	3.7e-13	580.319	2	1.6	LAVNMVPFPR	Oxidation@5	MDA_143_FTMSms2hcd	35.674	1	40.4	1.1e-08	8	49831.5	HUMAN	Tubulin beta-4B chain
[118-1]	P68371	Oxidation	M	267	-	15	43.1	7.43	3.7e-13	818.921	2	2.2	LHFFMPGFAPLTSR	Oxidation@5	MDA_143_FTMSms2hcd	41.604	1	46	1.6e-10	7	49831.5	HUMAN	Tubulin beta-4B chain
[118-1]	P68371	Oxidation	M	293	-	15	43.1	7.43	3.7e-13	854.437	2	2.9	ALTVPELTQQMFDAK	Oxidation@11	MDA_143_FTMSms2hcd	38.469	1	45.8	1.1e-08	3	49831.5	HUMAN	Tubulin beta-4B chain
[118-1]	P68371	Oxidation	M	330	-	15	43.1	7.43	3.7e-13	731.847	2	2.4	EVDEQMLNVQNK	Oxidation@6	MDA_143_FTMSms2hcd	22.582	1	42.5	1.9e-10	4	49831.5	HUMAN	Tubulin beta-4B chain
[118-1]	P68371	Oxidation	M	363	-	15	43.1	7.43	3.7e-13	937.475	2	3.4	MSATFIGNSTAIQELFK	Oxidation@1	MDA_143_FTMSms2hcd	47.122	1	41	4.3e-11	3	49831.5	HUMAN	Tubulin beta-4B chain
[118-1]	P68371	Oxidation	M	388	-	15	43.1	7.43	3.7e-13	623.301	2	0.71	ISEQFTAMFR	Oxidation@8	MDA_143_FTMSms2hcd	32.06	2	49.5	4.8e-11	6	49831.5	HUMAN	Tubulin beta-4B chain
[118-2]	Q13885	Oxidation	M	73	-	11	32.4	7.43	3.7e-13	816.42	2	0.87	AILVDLEPGTMDSVR	Oxidation@11	MDA_143_FTMSms2hcd	37.329	1	41.8	2.7e-10	4	49907.4	HUMAN	Tubulin beta-2A chain
[118-2]	Q13885	Oxidation	M	257	-	11	32.4	7.43	3.7e-13	580.319	2	1.6	LAVNMVPFPR	Oxidation@5	MDA_143_FTMSms2hcd	35.674	1	40.4	1.1e-08	8	49907.4	HUMAN	Tubulin beta-2A chain
[118-2]	Q13885	Oxidation	M	267	-	11	32.4	7.43	3.7e-13	818.921	2	2.2	LHFFMPGFAPLTSR	Oxidation@5	MDA_143_FTMSms2hcd	41.604	1	46	1.6e-10	7	49907.4	HUMAN	Tubulin beta-2A chain
[118-2]	Q13885	Oxidation	M	330	-	11	32.4	7.43	3.7e-13	731.847	2	2.4	EVDEQMLNVQNK	Oxidation@6	MDA_143_FTMSms2hcd	22.582	1	42.5	1.9e-10	4	49907.4	HUMAN	Tubulin beta-2A chain
[118-2]	Q13885	Oxidation	M	363	-	11	32.4	7.43	3.7e-13	937.475	2	3.4	MSATFIGNSTAIQELFK	Oxidation@1	MDA_143_FTMSms2hcd	47.122	1	41	4.3e-11	3	49907.4	HUMAN	Tubulin beta-2A chain
[118-2]	Q13885	Oxidation	M	388	-	11	32.4	7.43	3.7e-13	623.301	2	0.71	ISEQFTAMFR	Oxidation@8	MDA_143_FTMSms2hcd	32.06	2	49.5	4.8e-11	6	49907.4	HUMAN	Tubulin beta-2A chain
[118-3]	Q9BVA1	Oxidation	M	73	-	11	32.4	7.43	3.7e-13	816.42	2	0.87	AILVDLEPGTMDSVR	Oxidation@11	MDA_143_FTMSms2hcd	37.329	1	41.8	2.7e-10	4	49953.5	HUMAN	Tubulin beta-2B chain
[118-3]	Q9BVA1	Oxidation	M	257	-	11	32.4	7.43	3.7e-13	580.319	2	1.6	LAVNMVPFPR	Oxidation@5	MDA_143_FTMSms2hcd	35.674	1	40.4	1.1e-08	8	49953.5	HUMAN	Tubulin beta-2B chain
[118-3]	Q9BVA1	Oxidation	M	267	-	11	32.4	7.43	3.7e-13	818.921	2	2.2	LHFFMPGFAPLTSR	Oxidation@5	MDA_143_FTMSms2hcd	41.604	1	46	1.6e-10	7	49953.5	HUMAN	Tubulin beta-2B chain
[118-3]	Q9BVA1	Oxidation	M	330	-	11	32.4	7.43	3.7e-13	731.847	2	2.4	EVDEQMLNVQNK	Oxidation@6	MDA_143_FTMSms2hcd	22.582	1	42.5	1.9e-10	4	49953.5	HUMAN	Tubulin beta-2B chain
[118-3]	Q9BVA1	Oxidation	M	363	-	11	32.4	7.43	3.7e-13	937.475	2	3.4	MSATFIGNSTAIQELFK	Oxidation@1	MDA_143_FTMSms2hcd	47.122	1	41	4.3e-11	3	49953.5	HUMAN	Tubulin beta-2B chain
[118-3]	Q9BVA1	Oxidation	M	388	-	11	32.4	7.43	3.7e-13	623.301	2	0.71	ISEQFTAMFR	Oxidation@8	MDA_143_FTMSms2hcd	32.06	2	49.5	4.8e-11	6	49953.5	HUMAN	Tubulin beta-2B chain
[118-4]	P04350	Oxidation	M	73	-	11	32.2	6.48	2.1e-11	809.413	2	2.4	AVLVDLEPGTMDSVR	Oxidation@11	MDA_143_FTMSms2hcd	35.546	1	47.5	8.1e-11	3	49586.2	HUMAN	Tubulin beta-4A chain
[118-4]	P04350	Oxidation	M	164	-	11	32.2	6.48	2.1e-11	668.353	2	1.2	IMNTFSVVPSPK	Oxidation@2	MDA_143_FTMSms2hcd	32.645	1	33.8	1.2e-08	4	49586.2	HUMAN	Tubulin beta-4A chain
[118-4]	P04350	Oxidation	M	257	-	11	32.2	6.48	2.1e-11	580.319	2	1.6	LAVNMVPFPR	Oxidation@5	MDA_143_FTMSms2hcd	35.674	1	40.4	1.1e-08	8	49586.2	HUMAN	Tubulin beta-4A chain
[118-4]	P04350	Oxidation	M	267	-	11	32.2	6.48	2.1e-11	818.921	2	2.2	LHFFMPGFAPLTSR	Oxidation@5	MDA_143_FTMSms2hcd	41.604	1	46	1.6e-10	7	49586.2	HUMAN	Tubulin beta-4A chain
[118-4]	P04350	Oxidation	M	293	-	11	32.2	6.48	2.1e-11	854.437	2	2.9	ALTVPELTQQMFDAK	Oxidation@11	MDA_143_FTMSms2hcd	38.469	1	45.8	1.1e-08	3	49586.2	HUMAN	Tubulin beta-4A chain
[118-4]	P04350	Oxidation	M	388	-	11	32.2	6.48	2.1e-11	623.301	2	0.71	ISEQFTAMFR	Oxidation@8	MDA_143_FTMSms2hcd	32.06	2	49.5	4.8e-11	6	49586.2	HUMAN	Tubulin beta-4A chain
[118-5]	Q13509	Oxidation	M	73	-	7	20.9	7.43	3.7e-13	816.42	2	0.87	AILVDLEPGTMDSVR	Oxidation@11	MDA_143_FTMSms2hcd	37.329	1	41.8	2.7e-10	4	50433.2	HUMAN	Tubulin beta-3 chain
[118-5]	Q13509	Oxidation	M	164	-	7	20.9	7.43	3.7e-13	668.353	2	1.2	IMNTFSVVPSPK	Oxidation@2	MDA_143_FTMSms2hcd	32.645	1	33.8	1.2e-08	4	50433.2	HUMAN	Tubulin beta-3 chain
[118-5]	Q13509	Oxidation	M	257	-	7	20.9	7.43	3.7e-13	580.319	2	1.6	LAVNMVPFPR	Oxidation@5	MDA_143_FTMSms2hcd	35.674	1	40.4	1.1e-08	8	50433.2	HUMAN	Tubulin beta-3 chain
[118-5]	Q13509	Oxidation	M	293	-	7	20.9	7.43	3.7e-13	854.437	2	2.9	ALTVPELTQQMFDAK	Oxidation@11	MDA_143_FTMSms2hcd	38.469	1	45.8	1.1e-08	3	50433.2	HUMAN	Tubulin beta-3 chain
[118-5]	Q13509	Oxidation	M	388	-	7	20.9	7.43	3.7e-13	623.301	2	0.71	ISEQFTAMFR	Oxidation@8	MDA_143_FTMSms2hcd	32.06	2	49.5	4.8e-11	6	50433.2	HUMAN	Tubulin beta-3 chain
[118-6]	Q9BUF5	Oxidation	M	257	-	5	12.6	6.38	3.3e-11	580.319	2	1.6	LAVNMVPFPR	Oxidation@5	MDA_143_FTMSms2hcd	35.674	1	40.4	1.1e-08	8	49857.6	HUMAN	Tubulin beta-6 chain
[118-6]	Q9BUF5	Oxidation	M	267	-	5	12.6	6.38	3.3e-11	818.921	2	2.2	LHFFMPGFAPLTSR	Oxidation@5	MDA_143_FTMSms2hcd	41.604	1	46	1.6e-10	7	49857.6	HUMAN	Tubulin beta-6 chain
[118-7]	Q3ZCM7	Oxidation	M	73	-	5	10.6	6.17	8.1e-11	809.413	2	2.4	AVLVDLEPGTMDSVR	Oxidation@11	MDA_143_FTMSms2hcd	35.546	1	47.5	8.1e-11	3	49776.5	HUMAN	Tubulin beta-8 chain
[118-7]	Q3ZCM7	Oxidation	M	257	-	5	10.6	6.17	8.1e-11	580.319	2	1.6	LAVNMVPFPR	Oxidation@5	MDA_143_FTMSms2hcd	35.674	1	40.4	1.1e-08	8	49776.5	HUMAN	Tubulin beta-8 chain
[118-7]	Q3ZCM7	Oxidation	M	267	-	5	10.6	6.17	8.1e-11	818.921	2	2.2	LHFFMPGFAPLTSR	Oxidation@5	MDA_143_FTMSms2hcd	41.604	1	46	1.6e-10	7	49776.5	HUMAN	Tubulin beta-8 chain
[119]	Q96HY7	Oxidation	M	170	-	19	29.3	8.96	5.5e-16	608.967	3	1.9	LMLESQEFDHFLATK	Oxidation@2	MDA_143_FTMSms2hcd	40.139	1	56.1	5.7e-12	1	103078	HUMAN	Probable 2-oxoglutarate dehydrogenase E1 component DHKTD1, mitochondrial
[119]	Q96HY7	Oxidation	M	198	-	19	29.3	8.96	5.5e-16	678.971	3	1.7	YGGEGAESMMGFFHELLK	Oxidation@9;Oxidation@10	MDA_143_FTMSms2hcd	39.156	1	56.3	1.8e-13	1	103078	HUMAN	Probable 2-oxoglutarate dehydrogenase E1 component DHKTD1, mitochondrial
[119]	Q96HY7	Oxidation	M	199	-	19	29.3	8.96	5.5e-16	678.971	3	1.7	YGGEGAESMMGFFHELLK	Oxidation@9;Oxidation@10	MDA_143_FTMSms2hcd	39.156	1	56.3	1.8e-13	1	103078	HUMAN	Probable 2-oxoglutarate dehydrogenase E1 component DHKTD1, mitochondrial
[119]	Q96HY7	Oxidation	M	208	-	19	29.3	8.96	5.5e-16	627.306	3	0.14	MSAYSGITDVIIGMPHR	Oxidation@1;Oxidation@14	MDA_143_FTMSms2hcd	36.928	1	49.6	1.1e-11	1	103078	HUMAN	Probable 2-oxoglutarate dehydrogenase E1 component DHKTD1, mitochondrial
[119]	Q96HY7	Oxidation	M	221	-	19	29.3	8.96	5.5e-16	627.306	3	0.14	MSAYSGITDVIIGMPHR	Oxidation@1;Oxidation@14	MDA_143_FTMSms2hcd	36.928	1	49.6	1.1e-11	1	103078	HUMAN	Probable 2-oxoglutarate dehydrogenase E1 component DHKTD1, mitochondrial
[119]	Q96HY7	Oxidation	M	448	-	19	29.3	8.96	5.5e-16	800.033	3	1.4	QWGHNELDEPFYTNPIMYK	Oxidation@17	MDA_143_FTMSms2hcd	38.746	1	47.5	3e-11	1	103078	HUMAN	Probable 2-oxoglutarate dehydrogenase E1 component DHKTD1, mitochondrial
[119]	Q96HY7	Oxidation	M	782	-	19	29.3	8.96	5.5e-16	986.833	3	2.9	LPAAVSTLQEMAPGTTFNPVIGDSSVDPK	Oxidation@11	MDA_143_FTMSms2hcd	42.964	1	56.9	1e-11	1	103078	HUMAN	Probable 2-oxoglutarate dehydrogenase E1 component DHKTD1, mitochondrial
[119]	Q96HY7	Oxidation	M	869	-	19	29.3	8.96	5.5e-16	848.388	3	2.8	DHIWSQEEPQNMGPWSFVSPR	Oxidation@12	MDA_143_FTMSms2hcd	40.794	1	52.9	1.1e-11	1	103078	HUMAN	Probable 2-oxoglutarate dehydrogenase E1 component DHKTD1, mitochondrial
[120]	O43264	Gln->pyro-Glu	Q	306	-	20	34.8	10	6.4e-18	869.945	2	5.2	QLLDLPLDTDLENEK	Gln->pyro-Glu@1	MDA_143_FTMSms2hcd	51.312	1	17.9	0.0012	1	88830.3	HUMAN	Centromere/kinetochore protein zw10 homolog
[120]	O43264	Met-loss+Acetyl	M	1	-	20	34.8	10	6.4e-18	708.368	2	1.2	MASFVTEVLAHSGR	Met-loss+Acetyl@1	MDA_143_FTMSms2hcd	49.689	1	64.8	7.3e-12	1	88830.3	HUMAN	Centromere/kinetochore protein zw10 homolog
[120]	O43264	Oxidation	M	415	-	20	34.8	10	6.4e-18	701.854	2	1	NLMTSEIHNTVK	Oxidation@3	MDA_143_FTMSms2hcd	21.706	1	38.8	5.8e-07	1	88830.3	HUMAN	Centromere/kinetochore protein zw10 homolog
[120]	O43264	Oxidation	M	613	-	20	34.8	10	6.4e-18	919.364	2	1.1	NFSNMDDEENYSAASK	Oxidation@5	MDA_143_FTMSms2hcd	21.802	1	59.1	6.4e-18	1	88830.3	HUMAN	Centromere/kinetochore protein zw10 homolog
[120]	O43264	Oxidation	M	653	-	20	34.8	10	6.4e-18	817.448	2	3.2	AMGTLLNTAISEVIGK	Oxidation@2	MDA_143_FTMSms2hcd	47.9	1	43	1.9e-10	1	88830.3	HUMAN	Centromere/kinetochore protein zw10 homolog
[120]	O43264	Oxidation	M	690	-	20	34.8	10	6.4e-18	990.469	2	2.3	TVMDEGPQVFAPLSEESK	Oxidation@3	MDA_143_FTMSms2hcd	36.42	1	66.9	1.2e-14	1	88830.3	HUMAN	Centromere/kinetochore protein zw10 homolog
[121]	Q9UNN5	Oxidation	M	100	-	23	35.5	7.8	7.7e-14	349.17	2	-0.36	MLDFR	Oxidation@1	MDA_143_FTMSms2hcd	23.611	1	15.8	0.011	1	73954.8	HUMAN	FAS-associated factor 1
[121]	Q9UNN5	Oxidation	M	455	-	23	35.5	7.8	7.7e-14	769.92	2	2.1	TDQFPLFLIIMGK	Oxidation@11	MDA_143_FTMSms2hcd	53.937	1	44.8	1.5e-12	1	73954.8	HUMAN	FAS-associated factor 1
[121]	Q9UNN5	Oxidation	M	477	-	23	35.5	7.8	7.7e-14	794.716	3	2.5	SSNEVLNVIQGNTTVDELMMR	Oxidation@19;Oxidation@20	MDA_143_FTMSms2hcd	41.521	1	46	7.7e-14	1	73954.8	HUMAN	FAS-associated factor 1
[121]	Q9UNN5	Oxidation	M	478	-	23	35.5	7.8	7.7e-14	794.716	3	2.5	SSNEVLNVIQGNTTVDELMMR	Oxidation@19;Oxidation@20	MDA_143_FTMSms2hcd	41.521	1	46	7.7e-14	1	73954.8	HUMAN	FAS-associated factor 1
[121]	Q9UNN5	Oxidation	M	481	-	23	35.5	7.8	7.7e-14	750.6	4	2.4	LMAAMEIFTAQQQEDIKDEDEREAR	Oxidation@2;Oxidation@5	MDA_143_FTMSms2hcd	31.081	1	64.8	1.3e-13	1	73954.8	HUMAN	FAS-associated factor 1
[121]	Q9UNN5	Oxidation	M	484	-	23	35.5	7.8	7.7e-14	750.6	4	2.4	LMAAMEIFTAQQQEDIKDEDEREAR	Oxidation@2;Oxidation@5	MDA_143_FTMSms2hcd	31.081	1	64.8	1.3e-13	1	73954.8	HUMAN	FAS-associated factor 1
[121]	Q9UNN5	Oxidation	M	533	-	23	35.5	7.8	7.7e-14	463.706	2	0.73	EMAEQFR	Oxidation@2	MDA_143_FTMSms2hcd	17.051	1	20.9	7.7e-05	1	73954.8	HUMAN	FAS-associated factor 1
[122]	P50542	Oxidation	M	369	-	16	36.2	9.04	3.8e-16	1006.83	3	3.6	HMEAWQYLGTTQAENEQELLAISALR	Oxidation@2	MDA_143_FTMSms2hcd	46.375	1	68.2	3.8e-16	1	70865.3	HUMAN	Peroxisomal targeting signal 1 receptor
[122]	P50542	Oxidation	M	585	-	16	36.2	9.04	3.8e-16	568.279	3	1.1	EAVEHFLEALNMQR	Oxidation@12	MDA_143_FTMSms2hcd	39.096	1	44.7	5.6e-10	1	70865.3	HUMAN	Peroxisomal targeting signal 1 receptor
[122]	P50542	Oxidation	M	599	-	16	36.2	9.04	3.8e-16	812.377	2	2.2	GEGGAMSENIWSTLR	Oxidation@6	MDA_143_FTMSms2hcd	36.279	1	37.5	9.9e-09	1	70865.3	HUMAN	Peroxisomal targeting signal 1 receptor
[122]	P50542	Oxidation	M	613	-	16	36.2	9.04	3.8e-16	913.442	2	1.4	LALSMLGQSDAYGAADAR	Oxidation@5	MDA_143_FTMSms2hcd	34.11	1	56.5	9.4e-13	1	70865.3	HUMAN	Peroxisomal targeting signal 1 receptor
[122]	P50542	Oxidation	M	634	-	16	36.2	9.04	3.8e-16	726.378	2	2.3	DLSTLLTMFGLPQ	Oxidation@8	MDA_143_FTMSms2hcd	57.855	1	27.4	2.5e-07	1	70865.3	HUMAN	Peroxisomal targeting signal 1 receptor
[123]	P51812	Oxidation	M	287	-	21	32.8	8.9	7e-16	901.98	2	2.9	LGMPQFLSPEAQSLLR	Oxidation@3	MDA_143_FTMSms2hcd	43.241	1	56.2	4.3e-11	1	83736.7	HUMAN	Ribosomal protein S6 kinase alpha-3
[123]	P51812	Oxidation	M	399	-	21	32.8	8.9	7e-16	826.659	4	2.9	GFSFVAITSDDESQAMQTVGVHSIVQQLHR	Oxidation@16	MDA_143_FTMSms2hcd	42.975	1	57.1	7e-16	1	83736.7	HUMAN	Ribosomal protein S6 kinase alpha-3
[123]	P51812	Oxidation	M	446	-	21	32.8	8.9	7e-16	513.75	2	0.26	ATNMEFAVK	Oxidation@4	MDA_143_FTMSms2hcd	22.134	1	31.1	2.6e-07	1	83736.7	HUMAN	Ribosomal protein S6 kinase alpha-3
[123]	P51812	Oxidation	M	659	-	21	32.8	8.9	7e-16	383.526	3	-0.86	MLHVDPHQR	Oxidation@1	MDA_143_FTMSms2hcd	16.06	1	31.8	6.6e-07	3	83736.7	HUMAN	Ribosomal protein S6 kinase alpha-3
[123]	P51812	Oxidation	M	703	-	21	32.8	8.9	7e-16	621.302	2	1.5	GAMAATYSALNR	Oxidation@3	MDA_143_FTMSms2hcd	23.27	1	33	1e-07	1	83736.7	HUMAN	Ribosomal protein S6 kinase alpha-3
[123-1]	Q15418	Oxidation	M	93	-	19	26	6.32	4.3e-11	540.284	3	0.84	KVTRPDSGHLYAMK	Oxidation@13	MDA_143_FTMSms2hcd	17.346	1	50.1	1.1e-09	1	82723.7	HUMAN	Ribosomal protein S6 kinase alpha-1
[123-1]	Q15418	Oxidation	M	271	-	19	26	6.32	4.3e-11	482.773	2	0.39	ETMTLILK	Oxidation@3	MDA_143_FTMSms2hcd	28.219	1	23.2	8.7e-06	1	82723.7	HUMAN	Ribosomal protein S6 kinase alpha-1
[123-1]	Q15418	Oxidation	M	442	-	19	26	6.32	4.3e-11	521.75	2	5.9	ATNMEYAVK	Oxidation@4	MDA_143_FTMSms2hcd	17.597	1	29	2.8e-08	1	82723.7	HUMAN	Ribosomal protein S6 kinase alpha-1
[123-1]	Q15418	Oxidation	M	655	-	19	26	6.32	4.3e-11	383.526	3	-0.86	MLHVDPHQR	Oxidation@1	MDA_143_FTMSms2hcd	16.06	1	31.8	6.6e-07	3	82723.7	HUMAN	Ribosomal protein S6 kinase alpha-1
[123-2]	Q15349	Oxidation	M	652	-	8	9.5	5.77	4.5e-10	383.526	3	-0.86	MLHVDPHQR	Oxidation@1	MDA_143_FTMSms2hcd	16.06	1	31.8	6.6e-07	3	83239.5	HUMAN	Ribosomal protein S6 kinase alpha-2
[124]	Q6PI48	Oxidation	M	134	-	23	36.3	8.01	3.1e-14	517.265	2	0.29	MPTGEIEIK	Oxidation@1	MDA_143_FTMSms2hcd	24.638	1	31.4	6.5e-06	1	73563.3	HUMAN	Aspartate--tRNA ligase, mitochondrial
[124]	Q6PI48	Oxidation	M	419	-	23	36.3	8.01	3.1e-14	904.924	2	1.6	NWNSPVANFIMESQR	Oxidation@11	MDA_143_FTMSms2hcd	42.511	1	55.8	3.1e-14	1	73563.3	HUMAN	Aspartate--tRNA ligase, mitochondrial
[124]	Q6PI48	Oxidation	M	430	-	23	36.3	8.01	3.1e-14	724.689	3	1.2	LMETQEEDVVLLTAGEHNK	Oxidation@2	MDA_143_FTMSms2hcd	34.28	1	44	2.1e-12	1	73563.3	HUMAN	Aspartate--tRNA ligase, mitochondrial
[124]	Q6PI48	Oxidation	M	563	-	23	36.3	8.01	3.1e-14	658.599	4	1.7	MLSHLLQALDYGAPPHGGIALGLDR	Oxidation@1	MDA_143_FTMSms2hcd	43.828	1	45.2	5.5e-09	1	73563.3	HUMAN	Aspartate--tRNA ligase, mitochondrial
[125]	Q9BTE3	Oxidation	M	174	-	18	31.8	9	4.6e-16	850.834	2	1.2	SYEDDDDMDLQPNK	Oxidation@8	MDA_143_FTMSms2hcd	21.746	1	50.3	4.6e-16	1	72980.8	HUMAN	Mini-chromosome maintenance complex-binding protein
[125]	Q9BTE3	Oxidation	M	422	-	18	31.8	9	4.6e-16	501.915	3	0.49	LQMTIENMNHLK	Oxidation@3;Oxidation@8	MDA_143_FTMSms2hcd	21.194	1	40.7	3.3e-09	1	72980.8	HUMAN	Mini-chromosome maintenance complex-binding protein
[125]	Q9BTE3	Oxidation	M	427	-	18	31.8	9	4.6e-16	501.915	3	0.49	LQMTIENMNHLK	Oxidation@3;Oxidation@8	MDA_143_FTMSms2hcd	21.194	1	40.7	3.3e-09	1	72980.8	HUMAN	Mini-chromosome maintenance complex-binding protein
[125]	Q9BTE3	Oxidation	M	580	-	18	31.8	9	4.6e-16	452.215	3	0.67	AVEDDFVEMRK	Oxidation@9	MDA_143_FTMSms2hcd	23.389	1	36.7	1.3e-09	1	72980.8	HUMAN	Mini-chromosome maintenance complex-binding protein
[126]	Q9UJX4	Oxidation	M	175	-	20	34	7.99	3.4e-14	691.809	2	0.67	TVEDADMELTSR	Oxidation@7	MDA_143_FTMSms2hcd	22.976	1	41.1	5.6e-10	1	85077.7	HUMAN	Anaphase-promoting complex subunit 5
[126]	Q9UJX4	Oxidation	M	399	-	20	34	7.99	3.4e-14	353.694	2	0.19	LMDALK	Oxidation@2	MDA_143_FTMSms2hcd	18.617	1	21.1	7.9e-06	2	85077.7	HUMAN	Anaphase-promoting complex subunit 5
[126]	Q9UJX4	Oxidation	M	557	-	20	34	7.99	3.4e-14	557.283	3	1.1	AVVLQAQNQMSEAHK	Oxidation@10	MDA_143_FTMSms2hcd	19.91	1	57.9	3.4e-14	1	85077.7	HUMAN	Anaphase-promoting complex subunit 5
[126]	Q9UJX4	Oxidation	M	579	-	20	34	7.99	3.4e-14	740.371	3	7.6	NTEMVISVLLSVAELYWR	Oxidation@4;Phospho@11=7	MDA_143_FTMSms2hcd	21.339	1	16.9	0.015	1	85077.7	HUMAN	Anaphase-promoting complex subunit 5
[126]	Q9UJX4	Oxidation	M	603	-	20	34	7.99	3.4e-14	653.041	3	2.7	SSSPTIALPMLLQALALSK	Oxidation@10	MDA_143_FTMSms2hcd	57.285	1	47.5	1.8e-10	1	85077.7	HUMAN	Anaphase-promoting complex subunit 5
[126]	Q9UJX4	Oxidation	M	664	-	20	34	7.99	3.4e-14	398.226	2	0.5	AMFLVAK	Oxidation@2	MDA_143_FTMSms2hcd	26.371	1	23.9	1.4e-07	1	85077.7	HUMAN	Anaphase-promoting complex subunit 5
[126]	Q9UJX4	Phospho	S	383	18	20	34	7.99	3.4e-14	595.073	4	12	AVHFGLPYLASLGIQSLVQQR	Phospho@16=18	MDA_143_FTMSms2hcd	41.316	1	15.9	0.018	1	85077.7	HUMAN	Anaphase-promoting complex subunit 5
[126]	Q9UJX4	Phospho	S	586	7	20	34	7.99	3.4e-14	740.371	3	7.6	NTEMVISVLLSVAELYWR	Oxidation@4;Phospho@11=7	MDA_143_FTMSms2hcd	21.339	1	16.9	0.015	1	85077.7	HUMAN	Anaphase-promoting complex subunit 5
[126-1]	Q96QK1	Met-loss	M	1	-	19	28.5	6.82	5e-12	758.349	2	-0.42	MPTTQQSPQDEQEK	Met-loss@1	MDA_143_FTMSms2hcd	13.871	1	58.8	5e-12	1	91707.8	HUMAN	Vacuolar protein sorting-associated protein 35
[126-1]	Q96QK1	Oxidation	M	40	-	19	28.5	6.82	5e-12	353.694	2	0.19	LMDALK	Oxidation@2	MDA_143_FTMSms2hcd	18.617	1	21.1	7.9e-06	2	91707.8	HUMAN	Vacuolar protein sorting-associated protein 35
[126-1]	Q96QK1	Oxidation	M	49	-	19	28.5	6.82	5e-12	572.283	2	1.2	HASNMLGELR	Oxidation@5	MDA_143_FTMSms2hcd	20.536	1	25.6	6.6e-06	1	91707.8	HUMAN	Vacuolar protein sorting-associated protein 35
[127]	O60716	Oxidation	M	158	-	21	26.1	7.04	2e-12	1001.5	3	2.5	TVQPVAMGPDGLPVDASSVSNNYIQTLGR	Oxidation@7	MDA_143_FTMSms2hcd	42.793	1	57	2e-12	1	108171	HUMAN	Catenin delta-1
[127]	O60716	Oxidation	M	245	-	21	26.1	7.04	2e-12	392.182	3	-0.1	YRPSMEGYR	Oxidation@5	MDA_143_FTMSms2hcd	16.215	1	28.7	2.9e-07	1	108171	HUMAN	Catenin delta-1
[127]	O60716	Oxidation	M	466	-	21	26.1	7.04	2e-12	831.074	3	1.9	DMDLTEVITGTLWNLSSHDSIK	Oxidation@2	MDA_143_FTMSms2hcd	55.312	1	57.5	1.2e-10	1	108171	HUMAN	Catenin delta-1
[127]	O60716	Oxidation	M	487	-	21	26.1	7.04	2e-12	696.851	4	2	MEIVDHALHALTDEVIIPHSGWER	Oxidation@1	MDA_143_FTMSms2hcd	43.031	1	44.4	4.4e-09	1	108171	HUMAN	Catenin delta-1
[127]	O60716	Oxidation	M	926	-	21	26.1	7.04	2e-12	589.274	2	0.33	SGDLGDMEPLK	Oxidation@7	MDA_143_FTMSms2hcd	23.53	1	38.5	3.1e-09	1	108171	HUMAN	Catenin delta-1
[128]	Q96EA4	Gln->pyro-Glu	Q	191	-	19	33.2	10.37	1.3e-18	800.426	2	1.9	QEQLELLITNLMR	Gln->pyro-Glu@1;Oxidation@12	MDA_143_FTMSms2hcd	56.852	1	43.2	4.2e-15	1	70172.7	HUMAN	Protein Spindly
[128]	Q96EA4	Oxidation	M	202	-	19	33.2	10.37	1.3e-18	800.426	2	1.9	QEQLELLITNLMR	Gln->pyro-Glu@1;Oxidation@12	MDA_143_FTMSms2hcd	56.852	1	43.2	4.2e-15	1	70172.7	HUMAN	Protein Spindly
[128]	Q96EA4	Oxidation	M	306	-	19	33.2	10.37	1.3e-18	587.848	2	1.6	LQIATLLQMK	Oxidation@9	MDA_143_FTMSms2hcd	40.002	1	44.1	1.5e-09	1	70172.7	HUMAN	Protein Spindly
[128]	Q96EA4	Oxidation	M	322	-	19	33.2	10.37	1.3e-18	481.273	2	0.67	LLAMLEQK	Oxidation@4	MDA_143_FTMSms2hcd	26.544	1	31.4	1.2e-05	1	70172.7	HUMAN	Protein Spindly
[128]	Q96EA4	Oxidation	M	350	-	19	33.2	10.37	1.3e-18	1163.86	3	2.4	NLYDSMESKPSVDSGTLEDNTYYTDLLQMK	Oxidation@6;Oxidation@29	MDA_143_FTMSms2hcd	40.023	1	69.4	1.3e-18	1	70172.7	HUMAN	Protein Spindly
[128]	Q96EA4	Oxidation	M	373	-	19	33.2	10.37	1.3e-18	1163.86	3	2.4	NLYDSMESKPSVDSGTLEDNTYYTDLLQMK	Oxidation@6;Oxidation@29	MDA_143_FTMSms2hcd	40.023	1	69.4	1.3e-18	1	70172.7	HUMAN	Protein Spindly
[129]	Q9BW92	Oxidation	M	53	-	20	32.5	8.09	2.2e-14	382.869	3	-0.72	LASMAQKEPR	Oxidation@4	MDA_143_FTMSms2hcd	13.697	1	33.3	3.7e-07	1	81036.8	HUMAN	Threonine--tRNA ligase, mitochondrial
[130]	O94829	Gln->pyro-Glu	Q	379	-	16	24.1	10.85	1.8e-19	897.157	3	2	QAVYQQVYRPVYFQLVDVLLHK	Gln->pyro-Glu@1	MDA_143_FTMSms2hcd	56.666	1	58.5	2e-15	1	108196	HUMAN	Importin-13
[130]	O94829	Oxidation	M	578	-	16	24.1	10.85	1.8e-19	741.718	3	2	YDLPPYAANIVAVSQDVLMK	Oxidation@19	MDA_143_FTMSms2hcd	52.463	1	49.3	3.2e-14	1	108196	HUMAN	Importin-13
[130]	O94829	Oxidation	M	734	-	16	24.1	10.85	1.8e-19	841.925	2	0.79	MYSTIPQASALDLTR	Oxidation@1	MDA_143_FTMSms2hcd	36.786	1	35.1	1.1e-09	1	108196	HUMAN	Importin-13
[130]	O94829	Oxidation	M	794	-	16	24.1	10.85	1.8e-19	738.386	3	2.3	DHPDIVDSFMQLLAQALKR	Oxidation@10	MDA_143_FTMSms2hcd	56.319	1	32.7	3.5e-10	1	108196	HUMAN	Importin-13
[130]	O94829	Oxidation	M	864	-	16	24.1	10.85	1.8e-19	553.316	3	1.4	MLLIAVLEAIGGQASR	Oxidation@1	MDA_143_FTMSms2hcd	55.047	1	44.3	2.6e-09	1	108196	HUMAN	Importin-13
[131]	O94973	Oxidation	M	143	-	18	27.1	7.54	2.4e-13	654.812	2	1.3	EMAEAFAGEIPK	Oxidation@2	MDA_143_FTMSms2hcd	30.702	1	32.5	1.1e-08	1	103961	HUMAN	AP-2 complex subunit alpha-2
[131]	O94973	Oxidation	M	161	-	18	27.1	7.54	2.4e-13	625.819	2	0.83	VLVAGDTMDSVK	Oxidation@8	MDA_143_FTMSms2hcd	23.485	1	45.2	1.6e-12	1	103961	HUMAN	AP-2 complex subunit alpha-2
[131]	O94973	Oxidation	M	601	-	18	27.1	7.54	2.4e-13	844.771	3	3.4	LSTVASTDILATVLEEMPPFPER	Oxidation@17	MDA_143_FTMSms2hcd	53.521	1	49.6	5.5e-13	1	103961	HUMAN	AP-2 complex subunit alpha-2
[131]	O94973	Oxidation	M	738	-	18	27.1	7.54	2.4e-13	518.254	2	3.2	MFIFYGNK	Oxidation@1	MDA_143_FTMSms2hcd	32.222	1	25.9	6.2e-06	1	103961	HUMAN	AP-2 complex subunit alpha-2
[131-1]	O95782	Oxidation	M	143	-	15	20.3	7.63	1.6e-13	661.807	2	1.4	EMGEAFAADIPR	Oxidation@2	MDA_143_FTMSms2hcd	31.79	1	36.6	5.9e-09	1	107547	HUMAN	AP-2 complex subunit alpha-1
[131-1]	O95782	Oxidation	M	870	-	15	20.3	7.63	1.6e-13	939.93	2	2.3	FFQPTEMAAQDFFQR	Oxidation@7	MDA_143_FTMSms2hcd	41.572	1	45	6.8e-11	1	107547	HUMAN	AP-2 complex subunit alpha-1
[131-1]	O95782	Oxidation	M	953	-	15	20.3	7.63	1.6e-13	668.821	2	2.2	LEPNAQAQMYR	Oxidation@9	MDA_143_FTMSms2hcd	21.376	1	44.5	8.5e-09	1	107547	HUMAN	AP-2 complex subunit alpha-1
[132]	Q9BUJ2	Gln->pyro-Glu	Q	107	-	20	20.6	7.82	7e-14	683.837	2	1.6	QNQFYDTQVIK	Gln->pyro-Glu@1	MDA_143_FTMSms2hcd	35.729	1	22.4	1e-05	1	95739.3	HUMAN	Heterogeneous nuclear ribonucleoprotein U-like protein 1
[132]	Q9BUJ2	Gln->pyro-Glu	Q	147	-	20	20.6	7.82	7e-14	1011.52	2	2.8	QGAPTSFLPPEASQLKPDR	Gln->pyro-Glu@1	MDA_143_FTMSms2hcd	40.254	1	54.2	8.4e-10	1	95739.3	HUMAN	Heterogeneous nuclear ribonucleoprotein U-like protein 1
[132]	Q9BUJ2	Gln->pyro-Glu	Q	593	-	20	20.6	7.82	7e-14	503.733	2	-0.92	QYNEEGRK	Gln->pyro-Glu@1	MDA_143_FTMSms2hcd	14.656	1	29.2	1.1e-05	1	95739.3	HUMAN	Heterogeneous nuclear ribonucleoprotein U-like protein 1
[132]	Q9BUJ2	Oxidation	M	131	-	20	20.6	7.82	7e-14	689.332	3	1.3	RPLEMEQQQAYRPEMK	Oxidation@5;Oxidation@15	MDA_143_FTMSms2hcd	19.051	1	47.5	3.2e-09	1	95739.3	HUMAN	Heterogeneous nuclear ribonucleoprotein U-like protein 1
[132]	Q9BUJ2	Oxidation	M	141	-	20	20.6	7.82	7e-14	689.332	3	1.3	RPLEMEQQQAYRPEMK	Oxidation@5;Oxidation@15	MDA_143_FTMSms2hcd	19.051	1	47.5	3.2e-09	1	95739.3	HUMAN	Heterogeneous nuclear ribonucleoprotein U-like protein 1
[132]	Q9BUJ2	Oxidation	M	352	-	20	20.6	7.82	7e-14	448.726	2	0.67	WMGIAFR	Oxidation@2	MDA_143_FTMSms2hcd	33.583	1	28.2	2.7e-05	1	95739.3	HUMAN	Heterogeneous nuclear ribonucleoprotein U-like protein 1
[132]	Q9BUJ2	Oxidation	M	459	-	20	20.6	7.82	7e-14	748.893	2	1.2	KYNILGTNAIMDK	Oxidation@11	MDA_143_FTMSms2hcd	29.207	1	38.8	5.1e-09	1	95739.3	HUMAN	Heterogeneous nuclear ribonucleoprotein U-like protein 1
[132]	Q9BUJ2	Oxidation	M	518	-	20	20.6	7.82	7e-14	592.288	2	1.6	MRPFEGFQR	Oxidation@1	MDA_143_FTMSms2hcd	24.376	1	26.2	1.6e-05	1	95739.3	HUMAN	Heterogeneous nuclear ribonucleoprotein U-like protein 1
[132]	Q9BUJ2	Oxidation	M	561	-	20	20.6	7.82	7e-14	643.636	3	1.3	TDEEGKDVPDHAVLEMK	Oxidation@16	MDA_143_FTMSms2hcd	22.636	1	55.4	7e-14	1	95739.3	HUMAN	Heterogeneous nuclear ribonucleoprotein U-like protein 1
[133]	O43719	Oxidation	M	160	-	19	22.1	9.76	1.8e-17	576.287	3	0.27	FGIIMRDPQTEEFK	Oxidation@5	MDA_143_FTMSms2hcd	31.325	1	35.8	1.2e-07	1	85853.5	HUMAN	HIV Tat-specific factor 1
[133]	O43719	Oxidation	M	271	-	19	22.1	9.76	1.8e-17	788.694	3	1.2	NMFHPMDFEDDPLVLNEIR	Oxidation@2;Oxidation@6	MDA_143_FTMSms2hcd	41.827	1	37.2	1e-10	1	85853.5	HUMAN	HIV Tat-specific factor 1
[133]	O43719	Oxidation	M	275	-	19	22.1	9.76	1.8e-17	788.694	3	1.2	NMFHPMDFEDDPLVLNEIR	Oxidation@2;Oxidation@6	MDA_143_FTMSms2hcd	41.827	1	37.2	1e-10	1	85853.5	HUMAN	HIV Tat-specific factor 1
[133]	O43719	Oxidation	M	411	-	19	22.1	9.76	1.8e-17	1072.46	2	0.98	MNAQETATGMAFEEPIDEK	Oxidation@1;Oxidation@10	MDA_143_FTMSms2hcd	29.356	1	70	1.8e-17	1	85853.5	HUMAN	HIV Tat-specific factor 1
[133]	O43719	Oxidation	M	420	-	19	22.1	9.76	1.8e-17	1072.46	2	0.98	MNAQETATGMAFEEPIDEK	Oxidation@1;Oxidation@10	MDA_143_FTMSms2hcd	29.356	1	70	1.8e-17	1	85853.5	HUMAN	HIV Tat-specific factor 1
[133]	O43719	Phospho	S	403	46	19	22.1	9.76	1.8e-17	412.839	3	-1.7	HFSEHPSTSK	Phospho@3=46	MDA_143_FTMSms2hcd	14.368	1	38.2	6.4e-09	1	85853.5	HUMAN	HIV Tat-specific factor 1
[134]	P27708	Met-loss+Acetyl	M	1	-	15	12.2	8.54	3.3e-15	642.863	2	2.1	MAALVLEDGSVLR	Met-loss+Acetyl@1	MDA_143_FTMSms2hcd	48.668	1	45.7	3.8e-09	1	242986	HUMAN	CAD protein
[134]	P27708	Oxidation	M	33	-	15	12.2	8.54	3.3e-15	1130.88	3	3.5	GQPFGAAVSTAGEVVFQTGMVGYPEALTDPSYK	Oxidation@20	MDA_143_FTMSms2hcd	48.387	1	58	3.3e-15	1	242986	HUMAN	CAD protein
[134]	P27708	Oxidation	M	522	-	15	12.2	8.54	3.3e-15	899.426	3	2.1	MAEIGEHVAPSEAANSLEQAQAAAER	Oxidation@1	MDA_143_FTMSms2hcd	33.242	1	61.4	4.4e-13	1	242986	HUMAN	CAD protein
[134]	P27708	Oxidation	M	2144	-	15	12.2	8.54	3.3e-15	939.778	3	2.5	GTKQEEFESIEEALPDTDVLYMTR	Oxidation@22	MDA_143_FTMSms2hcd	43.267	1	54.5	1e-10	1	242986	HUMAN	CAD protein
[134]	P27708	Oxidation	M	2215	-	15	12.2	8.54	3.3e-15	604.348	2	2.1	MALLATVLGRF	Oxidation@1	MDA_143_FTMSms2hcd	49.825	1	32.8	1.5e-07	1	242986	HUMAN	CAD protein
[135]	Q4V328	Met-loss+Acetyl	M	1	-	20	27.5	9	4.6e-16	675.32	2	0.1	MAQALSEEEFQR	Met-loss+Acetyl@1	MDA_143_FTMSms2hcd	33.93	1	35.6	1.7e-08	1	96006.3	HUMAN	GRIP1-associated protein 1
[135]	Q4V328	Oxidation	M	97	-	20	27.5	9	4.6e-16	692.847	2	5.9	LQNSTLMAEFSK	Oxidation@7	MDA_143_FTMSms2hcd	29.18	1	35.1	2.8e-07	1	96006.3	HUMAN	GRIP1-associated protein 1
[135]	Q4V328	Oxidation	M	198	-	20	27.5	9	4.6e-16	427.536	3	-0.87	WEMEKEEKR	Oxidation@3	MDA_143_FTMSms2hcd	13.277	1	16.6	0.00013	1	96006.3	HUMAN	GRIP1-associated protein 1
[135]	Q4V328	Oxidation	M	358	-	20	27.5	9	4.6e-16	510.761	2	1	TQELNMLR	Oxidation@6	MDA_143_FTMSms2hcd	22.254	1	24.1	1.2e-05	1	96006.3	HUMAN	GRIP1-associated protein 1
[135]	Q4V328	Oxidation	M	518	-	20	27.5	9	4.6e-16	867.423	3	2	ELETLQQTVEELQAQVHSMDGAK	Oxidation@19	MDA_143_FTMSms2hcd	45.392	1	54.6	4.6e-16	1	96006.3	HUMAN	GRIP1-associated protein 1
[136]	P68363	Gln->pyro-Glu	Q	85	-	19	41.9	8.51	3.7e-15	697.378	2	1.1	QLFHPEQLITGK	Gln->pyro-Glu@1	MDA_143_FTMSms2hcd	42.158	1	45.1	7.2e-09	1	50152.1	HUMAN	Tubulin alpha-1B chain
[136]	P68363	Oxidation	M	398	-	19	41.9	8.51	3.7e-15	452.218	2	1.4	FDLMYAK	Oxidation@4	MDA_143_FTMSms2hcd	29.095	1	26.2	8.2e-06	1	50152.1	HUMAN	Tubulin alpha-1B chain
[136]	P68363	Oxidation	M	425	-	19	41.9	8.51	3.7e-15	461.713	2	-0.11	EDMAALEK	Oxidation@3	MDA_143_FTMSms2hcd	15.86	1	17.1	0.0032	1	50152.1	HUMAN	Tubulin alpha-1B chain
[137]	Q04206	Oxidation	M	270	-	20	35	8.16	1.6e-14	375.202	2	-0.95	VSMQLR	Oxidation@3	MDA_143_FTMSms2hcd	15.431	1	32.7	2.2e-06	1	60219.7	HUMAN	Transcription factor p65
[137]	Q04206	Oxidation	M	284	-	20	35	8.16	1.6e-14	599.273	4	1.6	ELSEPMEFQYLPDTDDRHR	Oxidation@6	MDA_143_FTMSms2hcd	32.615	1	61.2	5.6e-14	1	60219.7	HUMAN	Transcription factor p65
[138]	Q5H9R7	Oxidation	M	163	-	19	23.7	7.33	5.8e-13	728.404	2	1.2	HIGTSAIMDLLLR	Oxidation@8	MDA_143_FTMSms2hcd	41.206	1	45.4	7.3e-11	1	97670	HUMAN	Serine/threonine-protein phosphatase 6 regulatory subunit 3
[138]	Q5H9R7	Oxidation	M	226	-	19	23.7	7.33	5.8e-13	800.74	3	3.6	DQMLQIQNSTEPDPLLATLEK	Oxidation@3	MDA_143_FTMSms2hcd	44.294	1	52.8	5.8e-13	1	97670	HUMAN	Serine/threonine-protein phosphatase 6 regulatory subunit 3
[138]	Q5H9R7	Oxidation	M	443	-	19	23.7	7.33	5.8e-13	639.807	2	2.5	ILEAWEMNEK	Oxidation@7	MDA_143_FTMSms2hcd	29.11	1	34.2	1.4e-10	1	97670	HUMAN	Serine/threonine-protein phosphatase 6 regulatory subunit 3
[138]	Q5H9R7	Oxidation	M	458	-	19	23.7	7.33	5.8e-13	363.175	3	0.25	HGYMGHLTR	Oxidation@4	MDA_143_FTMSms2hcd	14.083	1	47.5	1e-09	1	97670	HUMAN	Serine/threonine-protein phosphatase 6 regulatory subunit 3
[40-1, 138-1]	Q9H0D6	Oxidation	M	319	-	5	5.1	6.51	1.9e-11	886.435	2	2.9	ELTMASLPFTFDVER	Oxidation@4	MDA_143_FTMSms2hcd	45.326	1	43.8	1.9e-11	1	108583	HUMAN	5'-3' exoribonuclease 2
[139]	Q6L8Q7	Oxidation	M	35	-	16	34.3	8.74	1.4e-15	683.307	2	0.59	AEAGSQTAAGAMER	Oxidation@12	MDA_143_FTMSms2hcd	14.494	1	50.5	6.1e-14	1	67352.1	HUMAN	2',5'-phosphodiesterase 12
[139]	Q6L8Q7	Oxidation	M	471	-	16	34.3	8.74	1.4e-15	451.268	3	0.51	LIQMAVALAHIR	Oxidation@4	MDA_143_FTMSms2hcd	33.859	1	42.2	8.7e-09	1	67352.1	HUMAN	2',5'-phosphodiesterase 12
[140]	P83436	Acetyl	K	153	-	17	29	9.34	1.1e-16	856.163	4	9.3	TQDIAVISAKLTGMQNSLMMLVDTPDYSEK	Acetyl@10;Phospho@17=8	MDA_143_FTMSms2hcd	51.458	1	15	0.0018	1	86344.7	HUMAN	Conserved oligomeric Golgi complex subunit 7
[140]	P83436	Oxidation	M	42	-	17	29	9.34	1.1e-16	377.194	3	0.38	ADGHAATLVMK	Oxidation@10	MDA_143_FTMSms2hcd	17.08	1	36.3	1.4e-13	1	86344.7	HUMAN	Conserved oligomeric Golgi complex subunit 7
[140]	P83436	Oxidation	M	330	-	17	29	9.34	1.1e-16	492.519	4	0.53	GLEMALLPHLHEHNLVK	Oxidation@4	MDA_143_FTMSms2hcd	33.811	1	30.6	4.4e-06	1	86344.7	HUMAN	Conserved oligomeric Golgi complex subunit 7
[140]	P83436	Oxidation	M	547	-	17	29	9.34	1.1e-16	993.995	2	4.5	DNPAEYASLMEILYTLK	Oxidation@10	MDA_143_FTMSms2hcd	52.894	1	60.1	1.1e-16	1	86344.7	HUMAN	Conserved oligomeric Golgi complex subunit 7
[140]	P83436	Phospho	S	160	8	17	29	9.34	1.1e-16	856.163	4	9.3	TQDIAVISAKLTGMQNSLMMLVDTPDYSEK	Acetyl@10;Phospho@17=8	MDA_143_FTMSms2hcd	51.458	1	15	0.0018	1	86344.7	HUMAN	Conserved oligomeric Golgi complex subunit 7
[141]	Q8WTW3	Gln->pyro-Glu	Q	225	-	18	23.7	8.09	2.3e-14	565.814	2	0.96	QALTDFLLAR	Gln->pyro-Glu@1	MDA_143_FTMSms2hcd	51.106	1	40.4	8.9e-08	1	108979	HUMAN	Conserved oligomeric Golgi complex subunit 1
[141]	Q8WTW3	Oxidation	M	315	-	18	23.7	8.09	2.3e-14	554.272	2	1.5	GTGVLQEEMK	Oxidation@9	MDA_143_FTMSms2hcd	20.187	1	33.9	4.6e-07	1	108979	HUMAN	Conserved oligomeric Golgi complex subunit 1
[141]	Q8WTW3	Oxidation	M	505	-	18	23.7	8.09	2.3e-14	564.772	2	1.4	GQFASSGLSMK	Oxidation@10	MDA_143_FTMSms2hcd	21.856	1	33.5	1e-08	1	108979	HUMAN	Conserved oligomeric Golgi complex subunit 1
[141]	Q8WTW3	Oxidation	M	614	-	18	23.7	8.09	2.3e-14	363.867	3	0.26	LHSVLFMAR	Oxidation@7	MDA_143_FTMSms2hcd	27.998	1	17.6	0.00028	1	108979	HUMAN	Conserved oligomeric Golgi complex subunit 1
[142]	Q99567	Met-loss+Acetyl	M	1	-	17	32.1	7.86	6e-14	935.48	3	3.6	MAAAEGPVGDGELWQTWLPNHVVFLR	Met-loss+Acetyl@1	MDA_143_FTMSms2hcd	55.41	1	51.8	1e-13	1	83542.7	HUMAN	Nuclear pore complex protein Nup88
[142]	Q99567	Oxidation	M	132	-	17	32.1	7.86	6e-14	514.971	3	11	GLMVLELPKRWGK	Oxidation@3	MDA_143_FTMSms2hcd	50.902	1	15.3	0.0063	1	83542.7	HUMAN	Nuclear pore complex protein Nup88
[143]	Q9BVP2	Gln->pyro-Glu	Q	300	-	20	40.3	8.79	1.2e-15	1256.69	2	2.4	QITIIDSPSFIVSPLNSSSALALR	Gln->pyro-Glu@1	MDA_143_FTMSms2hcd	57.784	1	28.1	8.4e-10	1	61993.7	HUMAN	Guanine nucleotide-binding protein-like 3
[143]	Q9BVP2	Oxidation	M	106	-	20	40.3	8.79	1.2e-15	695.69	3	1.5	KLETNPDIKPSNVEPMEK	Oxidation@16	MDA_143_FTMSms2hcd	23.928	1	63.3	1e-13	1	61993.7	HUMAN	Guanine nucleotide-binding protein-like 3
[143]	Q9BVP2	Oxidation	M	292	-	20	40.3	8.79	1.2e-15	516.774	2	0.5	SMQVVPLDK	Oxidation@2	MDA_143_FTMSms2hcd	24.51	1	28	2.6e-07	1	61993.7	HUMAN	Guanine nucleotide-binding protein-like 3
[143]	Q9BVP2	Oxidation	M	334	-	20	40.3	8.79	1.2e-15	819.762	3	2.2	SPASIEVVKPMEAASAILSQADAR	Oxidation@11	MDA_143_FTMSms2hcd	40.785	1	78.8	1.2e-15	1	61993.7	HUMAN	Guanine nucleotide-binding protein-like 3
[144]	P10398	Gln->pyro-Glu	Q	167	-	19	35.6	6.88	3.9e-12	807.749	3	1.9	QHEAPSNRPLNELLTPQGPSPR	Gln->pyro-Glu@1	MDA_143_FTMSms2hcd	34.608	1	43.9	1e-11	1	67586	HUMAN	Serine/threonine-protein kinase A-Raf
[144]	P10398	Gln->pyro-Glu	Q	412	-	19	35.6	6.88	3.9e-12	681.312	2	1.4	QTAQGMDYLHAK	Gln->pyro-Glu@1;Oxidation@6	MDA_143_FTMSms2hcd	24.207	1	42.9	2.8e-11	3	67586	HUMAN	Serine/threonine-protein kinase A-Raf
[144]	P10398	Oxidation	M	39	-	19	35.6	6.88	3.9e-12	623.269	2	1.1	DGMSVYDSLDK	Oxidation@3	MDA_143_FTMSms2hcd	25.945	1	32.4	1.5e-08	1	67586	HUMAN	Serine/threonine-protein kinase A-Raf
[144]	P10398	Oxidation	M	355	-	19	35.6	6.88	3.9e-12	453.229	2	-0.0042	NEMQVLR	Oxidation@3	MDA_143_FTMSms2hcd	17.809	1	15.6	0.004	1	67586	HUMAN	Serine/threonine-protein kinase A-Raf
[144]	P10398	Oxidation	M	403	-	19	35.6	6.88	3.9e-12	661.843	2	1.2	FDMVQLIDVAR	Oxidation@3	MDA_143_FTMSms2hcd	38.282	1	30.9	2.7e-07	1	67586	HUMAN	Serine/threonine-protein kinase A-Raf
[144]	P10398	Oxidation	M	417	-	19	35.6	6.88	3.9e-12	681.312	2	1.4	QTAQGMDYLHAK	Gln->pyro-Glu@1;Oxidation@6	MDA_143_FTMSms2hcd	24.207	1	42.9	2.8e-11	3	67586	HUMAN	Serine/threonine-protein kinase A-Raf
[144]	P10398	Oxidation	M	521	-	19	35.6	6.88	3.9e-12	547.788	2	1.3	DQIIFMVGR	Oxidation@6	MDA_143_FTMSms2hcd	34.574	1	29.6	9.7e-07	3	67586	HUMAN	Serine/threonine-protein kinase A-Raf
[144]	P10398	Phospho	S	582	19	19	35.6	6.88	3.9e-12	532.232	2	0.67	SASEPSLHR	Phospho@3=19	MDA_143_FTMSms2hcd	16.954	1	42.1	2.7e-08	2	67586	HUMAN	Serine/threonine-protein kinase A-Raf
[144-1]	P04049	Gln->pyro-Glu	Q	192	-	13	23.9	6.97	2.6e-12	1263.67	2	4	QLLLFPNSTIGDSGVPALPSLTMR	Gln->pyro-Glu@1;Oxidation@23	MDA_143_FTMSms2hcd	57.513	1	18.5	4.7e-08	1	73052.2	HUMAN	RAF proto-oncogene serine/threonine-protein kinase
[144-1]	P04049	Gln->pyro-Glu	Q	451	-	13	23.9	6.97	2.6e-12	681.312	2	1.4	QTAQGMDYLHAK	Gln->pyro-Glu@1;Oxidation@6	MDA_143_FTMSms2hcd	24.207	1	42.9	2.8e-11	3	73052.2	HUMAN	RAF proto-oncogene serine/threonine-protein kinase
[144-1]	P04049	Oxidation	M	214	-	13	23.9	6.97	2.6e-12	1263.67	2	4	QLLLFPNSTIGDSGVPALPSLTMR	Gln->pyro-Glu@1;Oxidation@23	MDA_143_FTMSms2hcd	57.513	1	18.5	4.7e-08	1	73052.2	HUMAN	RAF proto-oncogene serine/threonine-protein kinase
[144-1]	P04049	Oxidation	M	265	-	13	23.9	6.97	2.6e-12	708.994	3	1.6	STSTPNVHMVSTTLPVDSR	Oxidation@9;Phospho@1|2|3	MDA_143_FTMSms2hcd	30.493	1	55.4	2.6e-12	1	73052.2	HUMAN	RAF proto-oncogene serine/threonine-protein kinase
[144-1]	P04049	Oxidation	M	456	-	13	23.9	6.97	2.6e-12	681.312	2	1.4	QTAQGMDYLHAK	Gln->pyro-Glu@1;Oxidation@6	MDA_143_FTMSms2hcd	24.207	1	42.9	2.8e-11	3	73052.2	HUMAN	RAF proto-oncogene serine/threonine-protein kinase
[144-1]	P04049	Oxidation	M	560	-	13	23.9	6.97	2.6e-12	547.788	2	1.3	DQIIFMVGR	Oxidation@6	MDA_143_FTMSms2hcd	34.574	1	29.6	9.7e-07	3	73052.2	HUMAN	RAF proto-oncogene serine/threonine-protein kinase
[144-1]	P04049	Phospho	S	43	65	13	23.9	6.97	2.6e-12	490.559	3	-0.29	RASDDGKLTDPSK	Phospho@3=65	MDA_143_FTMSms2hcd	15.589	1	36.5	2.4e-10	1	73052.2	HUMAN	RAF proto-oncogene serine/threonine-protein kinase
[144-1]	P04049	Phospho	S	621	19	13	23.9	6.97	2.6e-12	532.232	2	0.67	SASEPSLHR	Phospho@3=19	MDA_143_FTMSms2hcd	16.954	1	42.1	2.7e-08	2	73052.2	HUMAN	RAF proto-oncogene serine/threonine-protein kinase
[144-2]	P15056	Gln->pyro-Glu	Q	559	-	14	19.2	6.42	2.8e-11	681.312	2	1.4	QTAQGMDYLHAK	Gln->pyro-Glu@1;Oxidation@6	MDA_143_FTMSms2hcd	24.207	1	42.9	2.8e-11	3	84437.6	HUMAN	Serine/threonine-protein kinase B-raf
[144-2]	P15056	Oxidation	M	484	-	14	19.2	6.42	2.8e-11	901.978	2	1.2	MLNVTAPTPQQLQAFK	Oxidation@1	MDA_143_FTMSms2hcd	38.997	1	45.3	9.1e-10	1	84437.6	HUMAN	Serine/threonine-protein kinase B-raf
[144-2]	P15056	Oxidation	M	564	-	14	19.2	6.42	2.8e-11	681.312	2	1.4	QTAQGMDYLHAK	Gln->pyro-Glu@1;Oxidation@6	MDA_143_FTMSms2hcd	24.207	1	42.9	2.8e-11	3	84437.6	HUMAN	Serine/threonine-protein kinase B-raf
[144-2]	P15056	Oxidation	M	668	-	14	19.2	6.42	2.8e-11	547.788	2	1.3	DQIIFMVGR	Oxidation@6	MDA_143_FTMSms2hcd	34.574	1	29.6	9.7e-07	3	84437.6	HUMAN	Serine/threonine-protein kinase B-raf
[144-2]	P15056	Phospho	S	151	37	14	19.2	6.42	2.8e-11	477.589	3	1.3	SNPKSPQKPIVR	Phospho@5=37	MDA_143_FTMSms2hcd	16.924	1	45	1.2e-09	1	84437.6	HUMAN	Serine/threonine-protein kinase B-raf
[145]	O76094	Oxidation	M	512	-	17	29.5	8.79	1.1e-15	609.296	2	1.9	HLPSSDSMSLK	Oxidation@8	MDA_143_FTMSms2hcd	18.439	1	35.9	2.1e-10	1	74606.8	HUMAN	Signal recognition particle subunit SRP72
[146]	Q7Z6Z7	Gln->pyro-Glu	Q	3637	-	16	5.8	8.56	3e-15	548.822	2	0.95	QIGTLLAELR	Gln->pyro-Glu@1	MDA_143_FTMSms2hcd	53.516	1	33.7	3.3e-07	1	481895	HUMAN	E3 ubiquitin-protein ligase HUWE1
[146]	Q7Z6Z7	Gln->pyro-Glu	Q	3972	-	16	5.8	8.56	3e-15	1043.54	2	1.9	QSTTHLADGPFAVLVDYIR	Gln->pyro-Glu@1	MDA_143_FTMSms2hcd	55.27	1	62.8	7.6e-15	1	481895	HUMAN	E3 ubiquitin-protein ligase HUWE1
[146]	Q7Z6Z7	Oxidation	M	3435	-	16	5.8	8.56	3e-15	1214.94	3	4.7	SVPVSAGGEGETSPYSLEASPLGQLMNMLSHPVIR	Oxidation@26;Oxidation@28	MDA_143_FTMSms2hcd	48.361	1	64	3e-15	1	481895	HUMAN	E3 ubiquitin-protein ligase HUWE1
[146]	Q7Z6Z7	Oxidation	M	3437	-	16	5.8	8.56	3e-15	1214.94	3	4.7	SVPVSAGGEGETSPYSLEASPLGQLMNMLSHPVIR	Oxidation@26;Oxidation@28	MDA_143_FTMSms2hcd	48.361	1	64	3e-15	1	481895	HUMAN	E3 ubiquitin-protein ligase HUWE1
[146]	Q7Z6Z7	Oxidation	M	4073	-	16	5.8	8.56	3e-15	725.83	2	1.8	EMFNPMYALFR	Oxidation@2;Oxidation@6	MDA_143_FTMSms2hcd	39.951	1	37.8	7.7e-10	1	481895	HUMAN	E3 ubiquitin-protein ligase HUWE1
[146]	Q7Z6Z7	Oxidation	M	4077	-	16	5.8	8.56	3e-15	725.83	2	1.8	EMFNPMYALFR	Oxidation@2;Oxidation@6	MDA_143_FTMSms2hcd	39.951	1	37.8	7.7e-10	1	481895	HUMAN	E3 ubiquitin-protein ligase HUWE1
[147]	Q9BW27	Oxidation	M	233	-	17	32.8	8.53	3.5e-15	434.207	2	0.044	IMGDLMR	Oxidation@2;Oxidation@6	MDA_143_FTMSms2hcd	17.909	1	21.3	3.1e-05	1	75020.1	HUMAN	Nuclear pore complex protein Nup85
[147]	Q9BW27	Oxidation	M	237	-	17	32.8	8.53	3.5e-15	434.207	2	0.044	IMGDLMR	Oxidation@2;Oxidation@6	MDA_143_FTMSms2hcd	17.909	1	21.3	3.1e-05	1	75020.1	HUMAN	Nuclear pore complex protein Nup85
[147]	Q9BW27	Oxidation	M	240	-	17	32.8	8.53	3.5e-15	1051.56	2	1.7	TMPILSPGNTQTLTELELK	Oxidation@2	MDA_143_FTMSms2hcd	42.689	1	57	1.6e-09	1	75020.1	HUMAN	Nuclear pore complex protein Nup85
[147]	Q9BW27	Oxidation	M	287	-	17	32.8	8.53	3.5e-15	723.88	2	1.2	IMLGDEAALLEQK	Oxidation@2	MDA_143_FTMSms2hcd	37.381	1	37	7.7e-08	1	75020.1	HUMAN	Nuclear pore complex protein Nup85
[147]	Q9BW27	Oxidation	M	564	-	17	32.8	8.53	3.5e-15	806.425	2	1.3	FADAASLLLSLMTSR	Oxidation@12	MDA_143_FTMSms2hcd	49.593	1	46.1	9.2e-12	1	75020.1	HUMAN	Nuclear pore complex protein Nup85
[147]	Q9BW27	Oxidation	M	601	-	17	32.8	8.53	3.5e-15	865.927	2	2.8	QVIFSAEQTYELMR	Oxidation@13	MDA_143_FTMSms2hcd	36.032	1	50.5	3.5e-15	1	75020.1	HUMAN	Nuclear pore complex protein Nup85
[148]	Q9Y4R8	Oxidation	M	42	-	18	23.8	8	3.3e-14	694.849	2	2.1	YLGEMEPPALPR	Oxidation@5	MDA_143_FTMSms2hcd	31.644	1	38.5	6.6e-09	1	91747.8	HUMAN	Telomere length regulation protein TEL2 homolog
[148]	Q9Y4R8	Oxidation	M	264	-	18	23.8	8	3.3e-14	1071.58	2	2.3	AMEAVLTGLVEAALGPEVLSR	Oxidation@2	MDA_143_FTMSms2hcd	55.213	1	63.9	3.3e-14	1	91747.8	HUMAN	Telomere length regulation protein TEL2 homolog
[148]	Q9Y4R8	Oxidation	M	299	-	18	23.8	8	3.3e-14	484.747	2	0.56	AQFVMTQK	Oxidation@5	MDA_143_FTMSms2hcd	18.67	1	26.7	2.4e-08	1	91747.8	HUMAN	Telomere length regulation protein TEL2 homolog
[148]	Q9Y4R8	Oxidation	M	387	-	18	23.8	8	3.3e-14	552.265	3	1.2	DSRDELLASMMAGVK	Oxidation@10;Oxidation@11	MDA_143_FTMSms2hcd	25.948	1	33.5	2.5e-08	1	91747.8	HUMAN	Telomere length regulation protein TEL2 homolog
[148]	Q9Y4R8	Oxidation	M	388	-	18	23.8	8	3.3e-14	552.265	3	1.2	DSRDELLASMMAGVK	Oxidation@10;Oxidation@11	MDA_143_FTMSms2hcd	25.948	1	33.5	2.5e-08	1	91747.8	HUMAN	Telomere length regulation protein TEL2 homolog
[148]	Q9Y4R8	Oxidation	M	791	-	18	23.8	8	3.3e-14	788.402	2	2.5	LLEDLMDELLEAR	Oxidation@6	MDA_143_FTMSms2hcd	43.951	1	42.6	7.1e-08	1	91747.8	HUMAN	Telomere length regulation protein TEL2 homolog
[149]	Q9H6T3	Oxidation	M	25	-	19	30.1	7.1	1.6e-12	698.812	2	0.69	QNAEELQDFMR	Oxidation@10	MDA_143_FTMSms2hcd	27.122	1	43.9	1.6e-12	1	75719.2	HUMAN	RNA polymerase II-associated protein 3
[149]	Q9H6T3	Oxidation	M	565	-	19	30.1	7.1	1.6e-12	680.827	2	1.3	SSPDMLYQYLK	Oxidation@5	MDA_143_FTMSms2hcd	36.296	1	31.8	2e-07	1	75719.2	HUMAN	RNA polymerase II-associated protein 3
[149-1]	Q6NUQ1	Oxidation	M	309	-	4	5.2	5.86	4.7e-11	804.461	3	2.6	YSLPASPSVILPIQVMLTPLQK	Oxidation@16	MDA_143_FTMSms2hcd	52.684	1	35.6	4.7e-11	1	90632.4	HUMAN	RAD50-interacting protein 1
[149-1]	Q6NUQ1	Oxidation	M	606	-	4	5.2	5.86	4.7e-11	343.855	3	-1.1	LKHDMLTR	Oxidation@5	MDA_143_FTMSms2hcd	13.868	1	24.2	0.00044	1	90632.4	HUMAN	RAD50-interacting protein 1
[150]	Q86Y56	Met-loss+Acetyl	M	1	-	19	26	7.72	1.1e-13	910.465	3	2.8	MAALGVAEAVAAPHPAEGAETAEAVELSR	Met-loss+Acetyl@1	MDA_143_FTMSms2hcd	44.573	1	53.4	3.8e-12	1	93522	HUMAN	Dynein axonemal assembly factor 5
[150]	Q86Y56	Oxidation	M	460	-	19	26	7.72	1.1e-13	745.407	2	0.96	TPSASGLLVLASAMR	Oxidation@14	MDA_143_FTMSms2hcd	41.1	1	60.2	1.1e-13	1	93522	HUMAN	Dynein axonemal assembly factor 5
[150-1]	Q9P2J5	Oxidation	M	377	-	6	7	6.87	4.2e-12	653.397	2	0.97	VIYVLPMLTIK	Oxidation@7	MDA_143_FTMSms2hcd	45.812	1	19.6	0.00014	1	134467	HUMAN	Leucine--tRNA ligase, cytoplasmic
[150-1]	Q9P2J5	Oxidation	M	1021	-	6	7	6.87	4.2e-12	858.458	3	2.7	AVLMENIVYLTNSLELEHIEVK	Oxidation@4	MDA_143_FTMSms2hcd	48.812	1	54	2.5e-11	1	134467	HUMAN	Leucine--tRNA ligase, cytoplasmic
[151]	P23246	Oxidation	M	357	-	17	28.3	8.58	2.8e-15	817.421	3	11	ALAEIAKAELDDTPMRGRQLR	Phospho@13;Oxidation@15	MDA_143_FTMSms2hcd	50.357	1	17.6	0.015	1	76150	HUMAN	Splicing factor, proline- and glutamine-rich
[151]	P23246	Oxidation	M	523	-	17	28.3	8.58	2.8e-15	611.786	4	2.7	DKLESEMEDAYHEHQANLLR	Oxidation@7	MDA_143_FTMSms2hcd	25.535	1	59.2	1e-12	1	76150	HUMAN	Splicing factor, proline- and glutamine-rich
[151]	P23246	Oxidation	M	549	-	17	28.3	8.58	2.8e-15	535.577	3	-0.0026	RMEELHNQEMQK	Oxidation@2;Oxidation@10	MDA_143_FTMSms2hcd	12.455	1	33.5	1.2e-09	1	76150	HUMAN	Splicing factor, proline- and glutamine-rich
[151]	P23246	Oxidation	M	557	-	17	28.3	8.58	2.8e-15	535.577	3	-0.0026	RMEELHNQEMQK	Oxidation@2;Oxidation@10	MDA_143_FTMSms2hcd	12.455	1	33.5	1.2e-09	1	76150	HUMAN	Splicing factor, proline- and glutamine-rich
[151]	P23246	Oxidation	M	600	-	17	28.3	8.58	2.8e-15	451.18	2	-0.58	MGYMDPR	Oxidation@1;Oxidation@4	MDA_143_FTMSms2hcd	15.468	1	17.5	1.9e-05	1	76150	HUMAN	Splicing factor, proline- and glutamine-rich
[151]	P23246	Oxidation	M	603	-	17	28.3	8.58	2.8e-15	451.18	2	-0.58	MGYMDPR	Oxidation@1;Oxidation@4	MDA_143_FTMSms2hcd	15.468	1	17.5	1.9e-05	1	76150	HUMAN	Splicing factor, proline- and glutamine-rich
[151]	P23246	Phospho	T	355	-	17	28.3	8.58	2.8e-15	817.421	3	11	ALAEIAKAELDDTPMRGRQLR	Phospho@13;Oxidation@15	MDA_143_FTMSms2hcd	50.357	1	17.6	0.015	1	76150	HUMAN	Splicing factor, proline- and glutamine-rich
[152]	Q6P996	Oxidation	M	58	-	15	30.3	9.44	7e-17	1083.78	4	3.3	LISGDIPGPLQGSGQDMVSILQLVQNLMHGDEDEEPQSPR	Oxidation@17;Oxidation@28	MDA_143_FTMSms2hcd	54.638	1	43.6	1.5e-12	1	86707.7	HUMAN	Pyridoxal-dependent decarboxylase domain-containing protein 1
[152]	Q6P996	Oxidation	M	69	-	15	30.3	9.44	7e-17	1083.78	4	3.3	LISGDIPGPLQGSGQDMVSILQLVQNLMHGDEDEEPQSPR	Oxidation@17;Oxidation@28	MDA_143_FTMSms2hcd	54.638	1	43.6	1.5e-12	1	86707.7	HUMAN	Pyridoxal-dependent decarboxylase domain-containing protein 1
[152]	Q6P996	Oxidation	M	413	-	15	30.3	9.44	7e-17	699.365	2	1.4	AVPVPNMTPSGVGR	Oxidation@7	MDA_143_FTMSms2hcd	26.152	1	48.4	1.3e-09	1	86707.7	HUMAN	Pyridoxal-dependent decarboxylase domain-containing protein 1
[152]	Q6P996	Oxidation	M	463	-	15	30.3	9.44	7e-17	690.372	2	0.71	FSPLMTAAVLGTR	Oxidation@5	MDA_143_FTMSms2hcd	39.811	1	44	1.1e-08	1	86707.7	HUMAN	Pyridoxal-dependent decarboxylase domain-containing protein 1
[152]	Q6P996	Oxidation	M	609	-	15	30.3	9.44	7e-17	610.322	2	1.2	LLENMTEVVR	Oxidation@5	MDA_143_FTMSms2hcd	25.902	1	42	3.9e-06	1	86707.7	HUMAN	Pyridoxal-dependent decarboxylase domain-containing protein 1
[153]	Q13144	Met-loss+Acetyl	M	1	-	18	27.9	7.86	5.9e-14	680.902	2	1.5	MAAPVVAPPGVVVSR	Met-loss+Acetyl@1	MDA_143_FTMSms2hcd	39.783	1	43	2.1e-11	1	80380.6	HUMAN	Translation initiation factor eIF-2B subunit epsilon
[153]	Q13144	Oxidation	M	181	-	18	27.9	7.86	5.9e-14	601.303	2	2.3	NVSVMTMIFK	Oxidation@5;Oxidation@7	MDA_143_FTMSms2hcd	31.663	1	32.2	3.6e-09	1	80380.6	HUMAN	Translation initiation factor eIF-2B subunit epsilon
[153]	Q13144	Oxidation	M	183	-	18	27.9	7.86	5.9e-14	601.303	2	2.3	NVSVMTMIFK	Oxidation@5;Oxidation@7	MDA_143_FTMSms2hcd	31.663	1	32.2	3.6e-09	1	80380.6	HUMAN	Translation initiation factor eIF-2B subunit epsilon
[153]	Q13144	Oxidation	M	289	-	18	27.9	7.86	5.9e-14	558.801	4	0.026	GLLVNEEILGNQIHMHVTAK	Oxidation@15	MDA_143_FTMSms2hcd	36.782	1	37.6	3.3e-09	1	80380.6	HUMAN	Translation initiation factor eIF-2B subunit epsilon
[153]	Q13144	Oxidation	M	547	-	18	27.9	7.86	5.9e-14	572.224	2	1	GGSPQMDDIK	Phospho@3;Oxidation@6	MDA_143_FTMSms2hcd	16.392	1	26.1	9.5e-07	1	80380.6	HUMAN	Translation initiation factor eIF-2B subunit epsilon
[153]	Q13144	Oxidation	M	663	-	18	27.9	7.86	5.9e-14	732.868	4	1.8	AADHLEALAAIEDFFLEHEALGISMAK	Oxidation@25	MDA_143_FTMSms2hcd	56.121	1	68	5.9e-14	1	80380.6	HUMAN	Translation initiation factor eIF-2B subunit epsilon
[153]	Q13144	Phospho	S	544	-	18	27.9	7.86	5.9e-14	572.224	2	1	GGSPQMDDIK	Phospho@3;Oxidation@6	MDA_143_FTMSms2hcd	16.392	1	26.1	9.5e-07	1	80380.6	HUMAN	Translation initiation factor eIF-2B subunit epsilon
[154]	Q9Y450	Oxidation	M	326	-	16	31.6	8.87	8e-16	535.747	2	0.81	GVTMDVGMTK	Oxidation@4;Oxidation@8	MDA_143_FTMSms2hcd	17.344	1	40.7	8.1e-12	1	75473.6	HUMAN	HBS1-like protein
[154]	Q9Y450	Oxidation	M	330	-	16	31.6	8.87	8e-16	535.747	2	0.81	GVTMDVGMTK	Oxidation@4;Oxidation@8	MDA_143_FTMSms2hcd	17.344	1	40.7	8.1e-12	1	75473.6	HUMAN	HBS1-like protein
[154]	Q9Y450	Oxidation	M	408	-	16	31.6	8.87	8e-16	675.299	2	0.33	MDQVNWQQER	Oxidation@1	MDA_143_FTMSms2hcd	23.077	1	41.3	3.5e-08	1	75473.6	HUMAN	HBS1-like protein
[155]	Q9UJX5	Oxidation	M	305	-	14	24.4	9.06	3.6e-16	712.688	3	2.3	NTTTSVQDEFMHLLLWGK	Oxidation@11	MDA_143_FTMSms2hcd	48.601	1	52.5	2.1e-13	1	92117.2	HUMAN	Anaphase-promoting complex subunit 4
[155]	Q9UJX5	Oxidation	M	411	-	14	24.4	9.06	3.6e-16	732.376	2	2.1	ANELLQVIDSSMK	Oxidation@12	MDA_143_FTMSms2hcd	39.746	1	47	1.8e-12	1	92117.2	HUMAN	Anaphase-promoting complex subunit 4
[155]	Q9UJX5	Oxidation	M	425	-	14	24.4	9.06	3.6e-16	534.29	2	2.9	WLYVAMLR	Oxidation@6	MDA_143_FTMSms2hcd	38.42	1	22.9	3.7e-05	1	92117.2	HUMAN	Anaphase-promoting complex subunit 4
[155]	Q9UJX5	Oxidation	M	428	-	14	24.4	9.06	3.6e-16	481.238	3	1.2	MTEDHVLPELNK	Oxidation@1	MDA_143_FTMSms2hcd	27.248	1	40	3.1e-09	1	92117.2	HUMAN	Anaphase-promoting complex subunit 4
[156]	Q00610	Oxidation	M	264	-	15	12.8	8.41	5.7e-15	865.755	3	3	AVDVFFPPEAQNDFPVAMQISEK	Oxidation@18	MDA_143_FTMSms2hcd	46.566	1	27.3	1.4e-08	1	191616	HUMAN	Clathrin heavy chain 1
[156]	Q00610	Oxidation	M	996	-	15	12.8	8.41	5.7e-15	982.009	2	1.2	AFMTADLPNELIELLEK	Oxidation@3	MDA_143_FTMSms2hcd	56.986	1	48.9	5.3e-11	1	191616	HUMAN	Clathrin heavy chain 1
[157]	Q9BQ52	Oxidation	M	262	-	13	19.9	9.59	3.7e-17	679.733	3	3.3	AKEMGLPVGTAAIAPIIAAVK	Oxidation@4	MDA_143_FTMSms2hcd	46.58	1	34	1.9e-08	1	92219.9	HUMAN	Zinc phosphodiesterase ELAC protein 2
[157]	Q9BQ52	Oxidation	M	343	-	13	19.9	9.59	3.7e-17	712.051	3	2.1	ADAPVALVVHMAPASVLVDSR	Oxidation@11	MDA_143_FTMSms2hcd	40.904	1	64	3.7e-17	1	92219.9	HUMAN	Zinc phosphodiesterase ELAC protein 2
[157]	Q9BQ52	Oxidation	M	494	-	13	19.9	9.59	3.7e-17	984.514	2	3.1	SQYPEIIFLGTGSAIPMK	Oxidation@17	MDA_143_FTMSms2hcd	45.664	1	38.2	1e-09	1	92219.9	HUMAN	Zinc phosphodiesterase ELAC protein 2
[157]	Q9BQ52	Oxidation	M	713	-	13	19.9	9.59	3.7e-17	497.912	3	0.42	THSTTSQAISVGMR	Oxidation@13	MDA_143_FTMSms2hcd	19.33	1	30.1	2.3e-07	1	92219.9	HUMAN	Zinc phosphodiesterase ELAC protein 2
[157]	Q9BQ52	Oxidation	M	750	-	13	19.9	9.59	3.7e-17	340.504	3	-0.42	VGVAFDHMK	Oxidation@8	MDA_143_FTMSms2hcd	20.801	1	35.1	7.2e-11	1	92219.9	HUMAN	Zinc phosphodiesterase ELAC protein 2
[157]	Q9BQ52	Oxidation	M	778	-	13	19.9	9.59	3.7e-17	763.346	2	0.28	ALFAGDIEEMEER	Oxidation@10	MDA_143_FTMSms2hcd	32.138	1	37.3	3.3e-11	1	92219.9	HUMAN	Zinc phosphodiesterase ELAC protein 2
[158]	P43246	Oxidation	M	141	-	20	25.2	6.83	4.9e-12	994.824	3	2.6	ASPGNLSQFEDILFGNNDMSASIGVVGVK	Oxidation@19	MDA_143_FTMSms2hcd	52.225	1	46.9	7.8e-12	1	104744	HUMAN	DNA mismatch repair protein Msh2
[159]	Q9HAV4	Gln->pyro-Glu	Q	145	-	14	17.8	7.27	7.5e-13	888.964	2	0.043	QGETQTELVMFILLR	Gln->pyro-Glu@1;Oxidation@10	MDA_143_FTMSms2hcd	56.91	1	43.2	7.4e-10	1	136312	HUMAN	Exportin-5
[159]	Q9HAV4	Oxidation	M	95	-	14	17.8	7.27	7.5e-13	833.095	3	3.8	NSVMELIANGTLNILEEENHIK	Oxidation@4	MDA_143_FTMSms2hcd	49.327	1	31.1	1.5e-07	1	136312	HUMAN	Exportin-5
[159]	Q9HAV4	Oxidation	M	154	-	14	17.8	7.27	7.5e-13	888.964	2	0.043	QGETQTELVMFILLR	Gln->pyro-Glu@1;Oxidation@10	MDA_143_FTMSms2hcd	56.91	1	43.2	7.4e-10	1	136312	HUMAN	Exportin-5
[159]	Q9HAV4	Oxidation	M	625	-	14	17.8	7.27	7.5e-13	741.372	3	3.3	DYPQLVLPNFDMLYNHVK	Oxidation@12	MDA_143_FTMSms2hcd	47.63	1	49.8	7.5e-13	1	136312	HUMAN	Exportin-5
[159]	Q9HAV4	Oxidation	M	673	-	14	17.8	7.27	7.5e-13	835.417	3	2.3	VFLEELMAPVASIWLSQDMHR	Oxidation@7;Oxidation@19	MDA_143_FTMSms2hcd	50.013	1	44.1	7.4e-12	1	136312	HUMAN	Exportin-5
[159]	Q9HAV4	Oxidation	M	685	-	14	17.8	7.27	7.5e-13	835.417	3	2.3	VFLEELMAPVASIWLSQDMHR	Oxidation@7;Oxidation@19	MDA_143_FTMSms2hcd	50.013	1	44.1	7.4e-12	1	136312	HUMAN	Exportin-5
[159]	Q9HAV4	Oxidation	M	1185	-	14	17.8	7.27	7.5e-13	1232.1	2	2.3	TKPMLETEVLDNDGGGLATIFEP	Oxidation@4	MDA_143_FTMSms2hcd	47.799	1	29.2	4.3e-06	1	136312	HUMAN	Exportin-5
[160]	O95905	Oxidation	M	457	-	17	30.9	7.51	2.6e-13	706.071	4	1.6	ESESVSKEEKEQNYDLTEVSESMK	Oxidation@23	MDA_143_FTMSms2hcd	24.845	1	41.4	4.8e-10	1	72758.7	HUMAN	Protein ecdysoneless homolog
[161]	Q9Y3Z3	Acetyl	K	455	-	16	29.7	7.95	4.1e-14	878.759	3	-13	QIEYRNLFKYVGETQPTGQIK	Acetyl@9;Phospho@17=13	MDA_143_FTMSms2hcd	39.471	1	17.8	0.0032	1	72201.1	HUMAN	Deoxynucleoside triphosphate triphosphohydrolase SAMHD1
[161]	Q9Y3Z3	Oxidation	M	362	-	16	29.7	7.95	4.1e-14	580.939	3	1.4	DKEVGNLYDMFHTR	Oxidation@10	MDA_143_FTMSms2hcd	29.056	1	45	6.8e-12	1	72201.1	HUMAN	Deoxynucleoside triphosphate triphosphohydrolase SAMHD1
[161]	Q9Y3Z3	Oxidation	M	416	-	16	29.7	7.95	4.1e-14	737.343	2	1.1	ISTAIDDMEAYTK	Oxidation@8	MDA_143_FTMSms2hcd	25.896	1	54.9	4.1e-14	1	72201.1	HUMAN	Deoxynucleoside triphosphate triphosphohydrolase SAMHD1
[161]	Q9Y3Z3	Phospho	T	463	13	16	29.7	7.95	4.1e-14	878.759	3	-13	QIEYRNLFKYVGETQPTGQIK	Acetyl@9;Phospho@17=13	MDA_143_FTMSms2hcd	39.471	1	17.8	0.0032	1	72201.1	HUMAN	Deoxynucleoside triphosphate triphosphohydrolase SAMHD1
[162]	P61978	Oxidation	M	27	-	15	41.3	8.07	2.5e-14	584.606	3	0.81	RPAEDMEEEQAFKR	Oxidation@6	MDA_143_FTMSms2hcd	18.804	1	50.8	6.1e-09	1	50976.7	HUMAN	Heterogeneous nuclear ribonucleoprotein K
[162]	P61978	Oxidation	M	42	-	15	41.3	8.07	2.5e-14	561.759	2	1	NTDEMVELR	Oxidation@5	MDA_143_FTMSms2hcd	21.923	1	32.8	5e-08	1	50976.7	HUMAN	Heterogeneous nuclear ribonucleoprotein K
[162]	P61978	Oxidation	M	241	-	15	41.3	8.07	2.5e-14	1082.78	3	1.3	AQPYDPNFYDETYDYGGFTMMFDDRR	Oxidation@20;Oxidation@21	MDA_143_FTMSms2hcd	41.23	1	39.9	2.5e-14	1	50976.7	HUMAN	Heterogeneous nuclear ribonucleoprotein K
[162]	P61978	Oxidation	M	242	-	15	41.3	8.07	2.5e-14	1082.78	3	1.3	AQPYDPNFYDETYDYGGFTMMFDDRR	Oxidation@20;Oxidation@21	MDA_143_FTMSms2hcd	41.23	1	39.9	2.5e-14	1	50976.7	HUMAN	Heterogeneous nuclear ribonucleoprotein K
[162]	P61978	Oxidation	M	283	-	15	41.3	8.07	2.5e-14	507.695	2	-0.18	DYDDMSPR	Oxidation@5	MDA_143_FTMSms2hcd	15.487	1	27.6	5e-08	1	50976.7	HUMAN	Heterogeneous nuclear ribonucleoprotein K
[162]	P61978	Oxidation	M	321	-	15	41.3	8.07	2.5e-14	507.222	2	0.64	GGDLMAYDR	Oxidation@5	MDA_143_FTMSms2hcd	20.514	1	26	9.4e-07	1	50976.7	HUMAN	Heterogeneous nuclear ribonucleoprotein K
[163]	Q658Y4	Oxidation	M	76	-	17	23.2	7.92	4.6e-14	669.663	3	1.7	DHLMLYPYHLSDIMVK	Oxidation@4;Oxidation@14	MDA_143_FTMSms2hcd	37.538	1	46.1	4.3e-13	1	93909.8	HUMAN	Protein FAM91A1
[163]	Q658Y4	Oxidation	M	86	-	17	23.2	7.92	4.6e-14	669.663	3	1.7	DHLMLYPYHLSDIMVK	Oxidation@4;Oxidation@14	MDA_143_FTMSms2hcd	37.538	1	46.1	4.3e-13	1	93909.8	HUMAN	Protein FAM91A1
[164]	Q8IUC4	Met-loss+Acetyl	M	1	-	16	26.8	7.21	9.6e-13	753.416	2	2.1	MTDALLPAAPQPLEK	Met-loss+Acetyl@1	MDA_143_FTMSms2hcd	42.197	1	32.4	2.3e-06	1	76994	HUMAN	Rhophilin-2
[164]	Q8IUC4	Oxidation	M	282	-	16	26.8	7.21	9.6e-13	772.361	2	0.41	MMLAQAQESVFEK	Oxidation@1;Oxidation@2	MDA_143_FTMSms2hcd	28.634	1	48.9	2.3e-12	1	76994	HUMAN	Rhophilin-2
[164]	Q8IUC4	Oxidation	M	283	-	16	26.8	7.21	9.6e-13	772.361	2	0.41	MMLAQAQESVFEK	Oxidation@1;Oxidation@2	MDA_143_FTMSms2hcd	28.634	1	48.9	2.3e-12	1	76994	HUMAN	Rhophilin-2
[164]	Q8IUC4	Oxidation	M	306	-	16	26.8	7.21	9.6e-13	522.266	2	1	NEFFMLVK	Oxidation@5	MDA_143_FTMSms2hcd	38.087	1	27.9	1.9e-06	1	76994	HUMAN	Rhophilin-2
[164]	Q8IUC4	Oxidation	M	328	-	16	26.8	7.21	9.6e-13	658.004	3	1.4	VGEVYQQLHAAMSQAPVK	Oxidation@12	MDA_143_FTMSms2hcd	29.869	1	55	2.1e-12	1	76994	HUMAN	Rhophilin-2
[164]	Q8IUC4	Oxidation	M	588	-	16	26.8	7.21	9.6e-13	600.759	2	1.7	SFGEDEIEMK	Oxidation@9	MDA_143_FTMSms2hcd	24.382	1	43.2	9.6e-13	1	76994	HUMAN	Rhophilin-2
[165]	Q14152	Oxidation	M	243	-	13	12.7	10.07	4.8e-18	1062.54	2	1.6	LVQLDSAISMELWQEAFK	Oxidation@10	MDA_143_FTMSms2hcd	51.801	1	60.2	6.8e-15	1	166571	HUMAN	Eukaryotic translation initiation factor 3 subunit A
[165]	Q14152	Oxidation	M	526	-	13	12.7	10.07	4.8e-18	639.84	2	0.87	NQLTAMSSVLAK	Oxidation@6	MDA_143_FTMSms2hcd	26.703	1	32.5	1.7e-07	1	166571	HUMAN	Eukaryotic translation initiation factor 3 subunit A
[165]	Q14152	Oxidation	M	670	-	13	12.7	10.07	4.8e-18	828.406	3	5	AFKDIDIEDLEELDPDFIMAK	Oxidation@19	MDA_143_FTMSms2hcd	48.352	1	44	2.5e-11	1	166571	HUMAN	Eukaryotic translation initiation factor 3 subunit A
[166]	Q16531	Oxidation	M	282	-	12	14.9	8.81	1e-15	757.394	3	1.1	LFMLLLEKEEQMDGTVTLK	Oxidation@3;Oxidation@12	MDA_143_FTMSms2hcd	41.759	1	48.8	6.2e-11	1	126969	HUMAN	DNA damage-binding protein 1
[166]	Q16531	Oxidation	M	291	-	12	14.9	8.81	1e-15	757.394	3	1.1	LFMLLLEKEEQMDGTVTLK	Oxidation@3;Oxidation@12	MDA_143_FTMSms2hcd	41.759	1	48.8	6.2e-11	1	126969	HUMAN	DNA damage-binding protein 1
[166]	Q16531	Oxidation	M	938	-	12	14.9	8.81	1e-15	732.719	3	2.1	SVLLLAYKPMEGNFEEIAR	Oxidation@10	MDA_143_FTMSms2hcd	41.235	1	67.8	1e-15	1	126969	HUMAN	DNA damage-binding protein 1
[166]	Q16531	Oxidation	M	1105	-	12	14.9	8.81	1e-15	691.652	3	1.1	MQEVVANLQYDDGSGMKR	Oxidation@1;Oxidation@16	MDA_143_FTMSms2hcd	25.954	1	50.8	1.7e-14	1	126969	HUMAN	DNA damage-binding protein 1
[166]	Q16531	Oxidation	M	1120	-	12	14.9	8.81	1e-15	691.652	3	1.1	MQEVVANLQYDDGSGMKR	Oxidation@1;Oxidation@16	MDA_143_FTMSms2hcd	25.954	1	50.8	1.7e-14	1	126969	HUMAN	DNA damage-binding protein 1
[167]	Q9UG63	Acetyl	K	365	-	17	29.1	8.47	4.5e-15	794.371	2	4.6	TLQKMMASGLTER	Acetyl@4;Phospho@11=11	MDA_143_FTMSms2hcd	42.991	1	16.3	0.0012	1	71290.9	HUMAN	ATP-binding cassette sub-family F member 2
[167]	Q9UG63	Acetyl	K	508	-	17	29.1	8.47	4.5e-15	744.387	3	-15	YGLTGKQQVSPIRNLSDGQK	Acetyl@6	MDA_143_FTMSms2hcd	21.395	1	18.2	0.039	1	71290.9	HUMAN	ATP-binding cassette sub-family F member 2
[167]	Q9UG63	Oxidation	M	65	-	17	29.1	8.47	4.5e-15	395.522	3	0.66	ELEDFEMKK	Oxidation@7	MDA_143_FTMSms2hcd	21.42	1	29.4	6.9e-06	1	71290.9	HUMAN	ATP-binding cassette sub-family F member 2
[167]	Q9UG63	Oxidation	M	206	-	17	29.1	8.47	4.5e-15	479.23	3	1.3	LEELDADKAEMR	Oxidation@11	MDA_143_FTMSms2hcd	21.467	1	48	1.6e-09	1	71290.9	HUMAN	ATP-binding cassette sub-family F member 2
[167]	Q9UG63	Oxidation	M	221	-	17	29.1	8.47	4.5e-15	486.263	3	1.5	ILHGLGFTPAMQR	Oxidation@11	MDA_143_FTMSms2hcd	30.675	1	30.1	2.8e-07	1	71290.9	HUMAN	ATP-binding cassette sub-family F member 2
[167]	Q9UG63	Oxidation	M	325	-	17	29.1	8.47	4.5e-15	521.604	3	0.85	TRLELEENQMKR	Oxidation@10	MDA_143_FTMSms2hcd	18.963	1	39	1.5e-07	1	71290.9	HUMAN	ATP-binding cassette sub-family F member 2
[167]	Q9UG63	Oxidation	M	338	-	17	29.1	8.47	4.5e-15	529.246	3	1.2	FHWEQDQIAHMK	Oxidation@11	MDA_143_FTMSms2hcd	24.837	1	46.1	4.5e-15	1	71290.9	HUMAN	ATP-binding cassette sub-family F member 2
[167]	Q9UG63	Oxidation	M	366	-	17	29.1	8.47	4.5e-15	514.231	2	0.23	MMASGLTER	Oxidation@1;Oxidation@2	MDA_143_FTMSms2hcd	16.462	1	32.8	4.2e-08	1	71290.9	HUMAN	ATP-binding cassette sub-family F member 2
[167]	Q9UG63	Oxidation	M	367	-	17	29.1	8.47	4.5e-15	514.231	2	0.23	MMASGLTER	Oxidation@1;Oxidation@2	MDA_143_FTMSms2hcd	16.462	1	32.8	4.2e-08	1	71290.9	HUMAN	ATP-binding cassette sub-family F member 2
[167]	Q9UG63	Oxidation	M	397	-	17	29.1	8.47	4.5e-15	792.946	2	1.6	IPPPVIMVQNVSFK	Oxidation@7	MDA_143_FTMSms2hcd	40.658	1	44	2.7e-09	1	71290.9	HUMAN	ATP-binding cassette sub-family F member 2
[167]	Q9UG63	Oxidation	M	453	-	17	29.1	8.47	4.5e-15	772.923	2	1.6	LLTGELLPTDGMIR	Oxidation@12	MDA_143_FTMSms2hcd	40.094	1	52.2	4e-10	1	71290.9	HUMAN	ATP-binding cassette sub-family F member 2
[167]	Q9UG63	Phospho	T	372	11	17	29.1	8.47	4.5e-15	794.371	2	4.6	TLQKMMASGLTER	Acetyl@4;Phospho@11=11	MDA_143_FTMSms2hcd	42.991	1	16.3	0.0012	1	71290.9	HUMAN	ATP-binding cassette sub-family F member 2
[168]	P23921	Oxidation	M	170	-	16	23.4	7.99	3.5e-14	350.679	4	-0.24	VAERPQHMLMR	Oxidation@8;Oxidation@10	MDA_143_FTMSms2hcd	14.9	1	22.9	0.0001	1	90071	HUMAN	Ribonucleoside-diphosphate reductase large subunit
[168]	P23921	Oxidation	M	172	-	16	23.4	7.99	3.5e-14	350.679	4	-0.24	VAERPQHMLMR	Oxidation@8;Oxidation@10	MDA_143_FTMSms2hcd	14.9	1	22.9	0.0001	1	90071	HUMAN	Ribonucleoside-diphosphate reductase large subunit
[168-1]	Q9UPU5	Oxidation	M	1586	-	6	3.6	6.26	5.6e-11	704.048	3	2.1	EMLGSSLIKPLLDDFLFR	Oxidation@2	MDA_143_FTMSms2hcd	55.752	1	33.6	5.6e-11	1	294368	HUMAN	Ubiquitin carboxyl-terminal hydrolase 24
[169]	Q92733	Oxidation	M	57	-	11	48.3	11.6	7e-21	1027.57	3	1.9	GPALLPPPPQMLAPAFPPPLLLPPPTGDPR	Oxidation@11	MDA_143_FTMSms2hcd	55.719	1	43.9	3.8e-12	1	52418.2	HUMAN	Proline-rich protein PRCC
[169]	Q92733	Phospho	S	157	67	11	48.3	11.6	7e-21	776.651	3	2.4	IAAPELHKGDSDSEEDEPTK	Phospho@11=67;Phospho@13=47	MDA_143_FTMSms2hcd	24.336	1	63.7	7e-21	1	52418.2	HUMAN	Proline-rich protein PRCC
[169]	Q92733	Phospho	S	159	47	11	48.3	11.6	7e-21	776.651	3	2.4	IAAPELHKGDSDSEEDEPTK	Phospho@11=67;Phospho@13=47	MDA_143_FTMSms2hcd	24.336	1	63.7	7e-21	1	52418.2	HUMAN	Proline-rich protein PRCC
[170]	Q9Y5Q9	Oxidation	M	516	-	14	20.5	9.29	1.3e-16	954.458	3	2.7	ALEALEPMYDPDTLAQDANAAQQELK	Oxidation@8	MDA_143_FTMSms2hcd	43.269	1	51.2	2.9e-12	1	101273	HUMAN	General transcription factor 3C polypeptide 3
[171]	Q15057	Gln->pyro-Glu	Q	149	-	16	25.1	8.32	8.4e-15	847.921	2	0.54	QHEVEEATNILTATR	Gln->pyro-Glu@1	MDA_143_FTMSms2hcd	36.987	1	34.1	2.6e-08	1	88029.4	HUMAN	Arf-GAP with coiled-coil, ANK repeat and PH domain-containing protein 2
[171]	Q15057	Oxidation	M	90	-	16	25.1	8.32	8.4e-15	862.75	3	1.9	FSDSLQEMINFHTILFDQTQR	Oxidation@8	MDA_143_FTMSms2hcd	44.822	1	59.5	8.4e-15	1	88029.4	HUMAN	Arf-GAP with coiled-coil, ANK repeat and PH domain-containing protein 2
[171]	Q15057	Phospho	S	540	14	16	25.1	8.32	8.4e-15	392.21	2	0.88	RLSISK	Phospho@3=14	MDA_143_FTMSms2hcd	18.322	1	15.3	0.00072	1	88029.4	HUMAN	Arf-GAP with coiled-coil, ANK repeat and PH domain-containing protein 2
[172]	P50570	Oxidation	M	6	-	15	18.9	8.1	2.1e-14	629.84	2	1.2	GMEELIPLVNK	Oxidation@2	MDA_143_FTMSms2hcd	36.374	1	37	6.4e-12	1	98065.1	HUMAN	Dynamin-2
[172]	P50570	Oxidation	M	159	-	15	18.9	8.1	2.1e-14	939.824	3	3.3	VPVGDQPPDIEYQIKDMILQFISR	Oxidation@17	MDA_143_FTMSms2hcd	54.541	1	43.1	3.9e-14	1	98065.1	HUMAN	Dynamin-2
[172-1]	Q9UQ16	Oxidation	M	377	-	5	5.6	3.62	3.3e-07	606.288	2	-2.5	MEFNEKELR	Oxidation@1	MDA_143_FTMSms2hcd	22.955	1	20.6	0.0064	1	97746.9	HUMAN	Dynamin-3
[173]	P46060	Oxidation	M	215	-	15	35.4	6.83	4.9e-12	909.991	4	2.7	VIGTLEEVHMPQNGINHPGITALAQAFAVNPLLR	Oxidation@10	MDA_143_FTMSms2hcd	50.043	1	35	1.1e-11	1	63542.5	HUMAN	Ran GTPase-activating protein 1
[173]	P46060	Oxidation	M	256	-	15	35.4	6.83	4.9e-12	503.766	2	1.6	GAVAMAETLK	Oxidation@5	MDA_143_FTMSms2hcd	21.516	1	40	2.7e-06	1	63542.5	HUMAN	Ran GTPase-activating protein 1
[173]	P46060	Oxidation	M	488	-	15	35.4	6.83	4.9e-12	726.349	2	2.9	MAVQDAVDALMQK	Oxidation@1;Oxidation@11	MDA_143_FTMSms2hcd	31.565	1	44.4	2e-11	1	63542.5	HUMAN	Ran GTPase-activating protein 1
[173]	P46060	Oxidation	M	498	-	15	35.4	6.83	4.9e-12	726.349	2	2.9	MAVQDAVDALMQK	Oxidation@1;Oxidation@11	MDA_143_FTMSms2hcd	31.565	1	44.4	2e-11	1	63542.5	HUMAN	Ran GTPase-activating protein 1
[174]	Q08211	Oxidation	M	745	-	13	14.7	9.1	3e-16	695.67	3	4.5	LFTAHNNMTNYATVWASK	Oxidation@8	MDA_143_FTMSms2hcd	32.707	1	32.1	2.3e-08	1	140960	HUMAN	ATP-dependent RNA helicase A
[174]	Q08211	Oxidation	M	1059	-	13	14.7	9.1	3e-16	626.039	3	3.1	GMTLVTPLQLLLFASKK	Oxidation@2	MDA_143_FTMSms2hcd	54.278	1	50.9	3e-16	1	140960	HUMAN	ATP-dependent RNA helicase A
[175]	Q14145	Oxidation	M	94	-	14	24.7	8.69	1.8e-15	498.566	3	0.12	YQDAPAAQFMAHK	Oxidation@10	MDA_143_FTMSms2hcd	22.967	1	46.6	1.3e-11	1	69666.9	HUMAN	Kelch-like ECH-associated protein 1
[175]	Q14145	Oxidation	M	120	-	14	24.7	8.69	1.8e-15	556.948	3	2	EQGMEVVSIEGIHPK	Oxidation@4	MDA_143_FTMSms2hcd	29.72	1	31.6	8e-09	1	69666.9	HUMAN	Kelch-like ECH-associated protein 1
[175]	Q14145	Oxidation	M	209	-	14	24.7	8.69	1.8e-15	501.571	3	0.81	EYIYMHFGEVAK	Oxidation@5	MDA_143_FTMSms2hcd	30.496	1	26.5	7.4e-07	1	69666.9	HUMAN	Kelch-like ECH-associated protein 1
[175]	Q14145	Oxidation	M	550	-	14	24.7	8.69	1.8e-15	916.926	2	1.4	YDVETETWTFVAPMK	Oxidation@14	MDA_143_FTMSms2hcd	40.376	1	56.6	1.8e-15	1	69666.9	HUMAN	Kelch-like ECH-associated protein 1
[176]	Q9NSD9	Met-loss	M	1	-	19	31.7	5.71	5.6e-10	315.695	2	-0.28	MPTVSVK	Met-loss@1	MDA_143_FTMSms2hcd	16.508	1	20.8	0.00025	1	66116.2	HUMAN	Phenylalanine--tRNA ligase beta subunit
[176]	Q9NSD9	Oxidation	M	468	-	19	31.7	5.71	5.6e-10	421.762	2	0.6	KMPLPLK	Oxidation@2	MDA_143_FTMSms2hcd	20.537	1	16.2	0.0033	1	66116.2	HUMAN	Phenylalanine--tRNA ligase beta subunit
[177]	Q13042	Oxidation	M	95	-	15	31.3	8.36	7e-15	727.693	3	1.7	EHQQALDVLDMEEPINKR	Oxidation@11	MDA_143_FTMSms2hcd	30.125	1	63.8	8e-13	1	71656.3	HUMAN	Cell division cycle protein 16 homolog
[177]	Q13042	Oxidation	M	123	-	15	31.3	8.36	7e-15	670.809	4	1.7	YLKDESGFKDPSSDWEMSQSSIK	Oxidation@17	MDA_143_FTMSms2hcd	29.571	1	32.7	1.5e-08	1	71656.3	HUMAN	Cell division cycle protein 16 homolog
[177]	Q13042	Oxidation	M	258	-	15	31.3	8.36	7e-15	461.749	2	-0.078	LTSVVMEK	Oxidation@6	MDA_143_FTMSms2hcd	20.294	1	30.4	1.6e-06	1	71656.3	HUMAN	Cell division cycle protein 16 homolog
[177]	Q13042	Oxidation	M	354	-	15	31.3	8.36	7e-15	949.439	4	2.3	TYGPAWIAYGHSFAVESEHDQAMAAYFTAAQLMK	Oxidation@23;Oxidation@33	MDA_143_FTMSms2hcd	44.662	1	47.2	7e-15	1	71656.3	HUMAN	Cell division cycle protein 16 homolog
[177]	Q13042	Oxidation	M	364	-	15	31.3	8.36	7e-15	949.439	4	2.3	TYGPAWIAYGHSFAVESEHDQAMAAYFTAAQLMK	Oxidation@23;Oxidation@33	MDA_143_FTMSms2hcd	44.662	1	47.2	7e-15	1	71656.3	HUMAN	Cell division cycle protein 16 homolog
[178]	Q8NEM2	Oxidation	M	531	-	15	28.3	9.3	1.3e-16	1087.54	4	3	ISMVNNIIHNNEGYGVVLVKPTIFSDLQENAEDGTEENK	Oxidation@3	MDA_143_FTMSms2hcd	44.371	1	57.1	1.3e-12	1	75691.2	HUMAN	SHC SH2 domain-binding protein 1
[179]	P42224	Oxidation	M	521	-	14	22.5	6.86	4.3e-12	723.867	2	1.1	GLNVDQLNMLGEK	Oxidation@9	MDA_143_FTMSms2hcd	34.063	1	49.5	4.3e-12	1	87335.5	HUMAN	Signal transducer and activator of transcription 1-alpha/beta
[179]	P42224	Oxidation	M	654	-	14	22.5	6.86	4.3e-12	721.373	2	2.2	VMAAENIPENPLK	Oxidation@2	MDA_143_FTMSms2hcd	30.635	1	40.5	1.1e-10	1	87335.5	HUMAN	Signal transducer and activator of transcription 1-alpha/beta
[179]	P42224	Oxidation	M	691	-	14	22.5	6.86	4.3e-12	664.806	2	0.65	EAPEPMELDGPK	Oxidation@6	MDA_143_FTMSms2hcd	23.793	1	42.8	1.5e-08	1	87335.5	HUMAN	Signal transducer and activator of transcription 1-alpha/beta
[180]	Q01433	Oxidation	M	463	-	17	20.1	8.08	2.4e-14	919.431	3	2.8	EVFESMNLTAYDLSVDTLDVHADR	Oxidation@6	MDA_143_FTMSms2hcd	42.431	1	62.6	2.4e-14	1	100689	HUMAN	AMP deaminase 2
[180]	Q01433	Oxidation	M	526	-	17	20.1	8.08	2.4e-14	686.322	3	1.4	EVMSDLEESKYQNAELR	Oxidation@3	MDA_143_FTMSms2hcd	26.004	1	51.6	6e-12	1	100689	HUMAN	AMP deaminase 2
[180-1]	Q92609	Oxidation	M	692	-	2	2.3	3.37	1.8e-06	653.826	2	1.5	GQGQSVQMSGAIK	Oxidation@8	MDA_143_FTMSms2hcd	17.523	1	35.5	1.8e-06	1	89005.2	HUMAN	TBC1 domain family member 5
[181]	Q9BVS4	Oxidation	M	25	-	13	30.6	7.35	5.3e-13	555.781	2	0.52	VLTAVEMGMK	Oxidation@7;Oxidation@9	MDA_143_FTMSms2hcd	21.715	1	34.5	1.4e-10	1	63283.6	HUMAN	Serine/threonine-protein kinase RIO2
[181]	Q9BVS4	Oxidation	M	27	-	13	30.6	7.35	5.3e-13	555.781	2	0.52	VLTAVEMGMK	Oxidation@7;Oxidation@9	MDA_143_FTMSms2hcd	21.715	1	34.5	1.4e-10	1	63283.6	HUMAN	Serine/threonine-protein kinase RIO2
[181]	Q9BVS4	Oxidation	M	101	-	13	30.6	7.35	5.3e-13	724.365	2	1.1	QVVESVGNQMGVGK	Oxidation@10	MDA_143_FTMSms2hcd	21.604	1	51.4	5.3e-13	1	63283.6	HUMAN	Serine/threonine-protein kinase RIO2
[181]	Q9BVS4	Oxidation	M	309	-	13	30.6	7.35	5.3e-13	646.964	3	1.6	EMQADDELLHPLGPDDK	Oxidation@2	MDA_143_FTMSms2hcd	31.59	1	47.6	8.5e-11	1	63283.6	HUMAN	Serine/threonine-protein kinase RIO2
[181]	Q9BVS4	Oxidation	M	474	-	13	30.6	7.35	5.3e-13	569.265	4	2	EFRPFRDEENVGAMNQYR	Oxidation@14	MDA_143_FTMSms2hcd	26.87	1	37.7	2.7e-09	1	63283.6	HUMAN	Serine/threonine-protein kinase RIO2
[182]	Q96GA3	Oxidation	M	177	-	14	35.6	7.74	9.9e-14	662.291	2	0.63	ATGEEEGMDIQK	Oxidation@8	MDA_143_FTMSms2hcd	16.209	1	41.5	4.7e-10	1	54855.4	HUMAN	Protein LTV1 homolog
[182]	Q96GA3	Oxidation	M	245	-	14	35.6	7.74	9.9e-14	735.817	2	1.6	FTEYSMTSSVMR	Oxidation@6;Oxidation@11	MDA_143_FTMSms2hcd	22.797	1	39.8	4e-09	1	54855.4	HUMAN	Protein LTV1 homolog
[182]	Q96GA3	Oxidation	M	250	-	14	35.6	7.74	9.9e-14	735.817	2	1.6	FTEYSMTSSVMR	Oxidation@6;Oxidation@11	MDA_143_FTMSms2hcd	22.797	1	39.8	4e-09	1	54855.4	HUMAN	Protein LTV1 homolog
[183]	Q9UP83	Oxidation	M	133	-	18	21.1	7.01	2.2e-12	901.446	3	3.9	HEDLLAQATGIESLEGVLQMMQTR	Oxidation@20;Oxidation@21	MDA_143_FTMSms2hcd	47.039	1	56.6	2.2e-12	1	92743.6	HUMAN	Conserved oligomeric Golgi complex subunit 5
[183]	Q9UP83	Oxidation	M	134	-	18	21.1	7.01	2.2e-12	901.446	3	3.9	HEDLLAQATGIESLEGVLQMMQTR	Oxidation@20;Oxidation@21	MDA_143_FTMSms2hcd	47.039	1	56.6	2.2e-12	1	92743.6	HUMAN	Conserved oligomeric Golgi complex subunit 5
[183]	Q9UP83	Oxidation	M	317	-	18	21.1	7.01	2.2e-12	666.833	2	1.6	STMPTPGNTAALR	Oxidation@3	MDA_143_FTMSms2hcd	22.524	1	45.6	4.1e-10	1	92743.6	HUMAN	Conserved oligomeric Golgi complex subunit 5
[183]	Q9UP83	Oxidation	M	655	-	18	21.1	7.01	2.2e-12	950.449	2	10	ELQGFIARVMSDYFK	Oxidation@10;Phospho@11|13	MDA_143_FTMSms2hcd	49.303	1	15.1	0.0083	1	92743.6	HUMAN	Conserved oligomeric Golgi complex subunit 5
[183]	Q9UP83	Oxidation	M	827	-	18	21.1	7.01	2.2e-12	896.491	2	2.1	EFAPVYPIMVQLLQK	Oxidation@9	MDA_143_FTMSms2hcd	46.878	1	33.1	3.4e-08	1	92743.6	HUMAN	Conserved oligomeric Golgi complex subunit 5
[183-1]	Q92503	Oxidation	M	20	-	8	11.5	5.92	2.3e-10	759.867	2	-2.5	YPFELIMAAYER	Oxidation@7	MDA_143_FTMSms2hcd	43.272	1	35.4	1.2e-08	1	81250.3	HUMAN	SEC14-like protein 1
[184]	P22314	Acetyl	K	125	-	13	20.6	8.57	2.9e-15	590.629	3	-3.3	EEDIGKNRAEVSQPR	Acetyl@6	MDA_143_FTMSms2hcd	28.324	1	18.8	0.0024	1	117850	HUMAN	Ubiquitin-like modifier-activating enzyme 1
[184]	P22314	Oxidation	M	410	-	13	20.6	8.57	2.9e-15	873.802	3	1.9	LAYVAAGDLAPINAFIGGLAAQEVMK	Oxidation@25	MDA_143_FTMSms2hcd	55.909	1	56.4	1.8e-13	1	117850	HUMAN	Ubiquitin-like modifier-activating enzyme 1
[185]	P51692	Gln->pyro-Glu	Q	601	-	17	22.1	5.89	2.7e-10	688.043	3	2.8	QQAHDLLINKPDGTFLLR	Gln->pyro-Glu@1	MDA_143_FTMSms2hcd	40.636	1	55.3	2.7e-10	1	89866.6	HUMAN	Signal transducer and activator of transcription 5B
[185-1]	P42226	Gln->pyro-Glu	Q	545	-	7	9.2	7.71	1.1e-13	1031.55	2	-1.2	QYVTSLLLNEPDGTFLLR	Gln->pyro-Glu@1	MDA_143_FTMSms2hcd	56.54	1	32.4	8e-06	1	94135.9	HUMAN	Signal transducer and activator of transcription 6
[186]	Q5T447	Oxidation	M	306	-	13	19.2	10.36	1.4e-18	869.933	2	1.1	LLLTVDTTDDNFMPK	Oxidation@13	MDA_143_FTMSms2hcd	38.748	1	54.4	1.4e-18	1	97113.8	HUMAN	E3 ubiquitin-protein ligase HECTD3
[186]	Q5T447	Oxidation	M	471	-	13	19.2	10.36	1.4e-18	461.879	3	0.68	DSESSKPSFMPR	Oxidation@10	MDA_143_FTMSms2hcd	19.741	1	26.8	4.1e-06	1	97113.8	HUMAN	E3 ubiquitin-protein ligase HECTD3
[187]	Q6NXG1	Oxidation	M	184	-	14	25.1	9.34	1.1e-16	914.098	3	3	YGASQVEDMGNIILAMISEPYNHR	Oxidation@9;Oxidation@16	MDA_143_FTMSms2hcd	42.799	1	64.8	4.8e-15	1	75586.1	HUMAN	Epithelial splicing regulatory protein 1
[187]	Q6NXG1	Oxidation	M	191	-	14	25.1	9.34	1.1e-16	914.098	3	3	YGASQVEDMGNIILAMISEPYNHR	Oxidation@9;Oxidation@16	MDA_143_FTMSms2hcd	42.799	1	64.8	4.8e-15	1	75586.1	HUMAN	Epithelial splicing regulatory protein 1
[187]	Q6NXG1	Oxidation	M	218	-	14	25.1	9.34	1.1e-16	660.828	2	1.9	MELIDDNTVVR	Oxidation@1	MDA_143_FTMSms2hcd	29.036	1	31.5	1e-07	1	75586.1	HUMAN	Epithelial splicing regulatory protein 1
[187-1]	Q9H6T0	Oxidation	M	154	-	7	9.9	4.87	3.8e-09	946.97	2	3.9	NLVLPDMFFSFYDLR	Oxidation@7	MDA_143_FTMSms2hcd	54.672	1	31.2	6.7e-09	1	78401.8	HUMAN	Epithelial splicing regulatory protein 2
[188]	P33121	Oxidation	M	1	7	15	23.4	7.73	1e-13	545.261	2	1	MQAHELFR	Acetyl@N-term=7;Oxidation@1=7	MDA_143_FTMSms2hcd	27.609	1	42.2	3.7e-09	1	77944.1	HUMAN	Long-chain-fatty-acid--CoA ligase 1
[188]	P33121	Oxidation	M	227	-	15	23.4	7.73	1e-13	855.444	2	1.7	IIVVMDAYGSELVER	Oxidation@5	MDA_143_FTMSms2hcd	37.032	1	44.7	4.9e-09	1	77944.1	HUMAN	Long-chain-fatty-acid--CoA ligase 1
[188]	P33121	Oxidation	M	352	-	15	23.4	7.73	1e-13	432.231	2	1.2	LLMDDLK	Oxidation@3	MDA_143_FTMSms2hcd	24.892	1	20.6	9.4e-06	1	77944.1	HUMAN	Long-chain-fatty-acid--CoA ligase 1
[188]	P33121	Oxidation	M	431	-	15	23.4	7.73	1e-13	932.025	2	1.6	LMVTGAAPVSATVLTFLR	Oxidation@2	MDA_143_FTMSms2hcd	51.577	1	55.4	1e-13	1	77944.1	HUMAN	Long-chain-fatty-acid--CoA ligase 1
[188]	P33121	Oxidation	M	578	-	15	23.4	7.73	1e-13	477.74	2	1.3	IENIYMR	Oxidation@6	MDA_143_FTMSms2hcd	22.44	1	29.6	6.7e-07	1	77944.1	HUMAN	Long-chain-fatty-acid--CoA ligase 1
[188]	P33121	Oxidation	M	638	-	15	23.4	7.73	1e-13	481.753	2	2.3	AILEDMVR	Oxidation@6	MDA_143_FTMSms2hcd	24.694	1	29.1	7.6e-06	1	77944.1	HUMAN	Long-chain-fatty-acid--CoA ligase 1
[188]	P33121	Oxidation	M	674	-	15	23.4	7.73	1e-13	771.746	3	2.7	GITLHPELFSIDNGLLTPTMK	Oxidation@20	MDA_143_FTMSms2hcd	46.452	1	38.5	5e-09	1	77944.1	HUMAN	Long-chain-fatty-acid--CoA ligase 1
[189]	Q9H3P7	Met-loss+Acetyl	M	1	-	13	31.6	9.41	8.2e-17	443.243	2	0.3	MAAVLNAER	Met-loss+Acetyl@1	MDA_143_FTMSms2hcd	30.836	1	33	6.7e-07	1	60593.9	HUMAN	Golgi resident protein GCP60
[189]	Q9H3P7	Oxidation	M	152	-	13	31.6	9.41	8.2e-17	561.766	2	0.27	EWAALGNMSK	Oxidation@8	MDA_143_FTMSms2hcd	26.122	1	25.7	1.3e-06	1	60593.9	HUMAN	Golgi resident protein GCP60
[189]	Q9H3P7	Oxidation	M	158	-	13	31.6	9.41	8.2e-17	542.256	2	1.5	EDAMVEFVK	Oxidation@4	MDA_143_FTMSms2hcd	26.814	1	34.8	8e-08	1	60593.9	HUMAN	Golgi resident protein GCP60
[189]	Q9H3P7	Oxidation	M	374	-	13	31.6	9.41	8.2e-17	680.705	3	2.1	ESLPVIAAPSMWTRPQIK	Oxidation@11	MDA_143_FTMSms2hcd	39.939	1	62.6	2.6e-12	1	60593.9	HUMAN	Golgi resident protein GCP60
[190]	Q5SSJ5	Met-loss+Acetyl	M	1	-	15	35.1	6.97	2.6e-12	712.855	2	1.2	MATDTSQGELVHPK	Met-loss+Acetyl@1	MDA_143_FTMSms2hcd	23.807	1	46.8	3.8e-12	1	61207.5	HUMAN	Heterochromatin protein 1-binding protein 3
[190]	Q5SSJ5	Oxidation	M	39	-	15	35.1	6.97	2.6e-12	532.259	2	0.83	VEDSTMPIR	Oxidation@6	MDA_143_FTMSms2hcd	18.349	1	32.3	2.2e-08	1	61207.5	HUMAN	Heterochromatin protein 1-binding protein 3
[190]	Q5SSJ5	Oxidation	M	161	-	15	35.1	6.97	2.6e-12	560.8	2	0.077	MDAILTEAIK	Oxidation@1	MDA_143_FTMSms2hcd	32.197	1	30.8	4.6e-07	1	61207.5	HUMAN	Heterochromatin protein 1-binding protein 3
[190]	Q5SSJ5	Oxidation	M	342	-	15	35.1	6.97	2.6e-12	941.484	3	2.3	SGEKPLLGGSLMEYAILSAIAAMNEPK	Oxidation@12;Oxidation@23	MDA_143_FTMSms2hcd	50.006	1	55.5	2.6e-12	1	61207.5	HUMAN	Heterochromatin protein 1-binding protein 3
[190]	Q5SSJ5	Oxidation	M	353	-	15	35.1	6.97	2.6e-12	941.484	3	2.3	SGEKPLLGGSLMEYAILSAIAAMNEPK	Oxidation@12;Oxidation@23	MDA_143_FTMSms2hcd	50.006	1	55.5	2.6e-12	1	61207.5	HUMAN	Heterochromatin protein 1-binding protein 3
[190]	Q5SSJ5	Oxidation	M	381	-	15	35.1	6.97	2.6e-12	569.28	4	1.3	YVLENHPGTNSNYQMHLLK	Oxidation@15	MDA_143_FTMSms2hcd	27.171	1	18.3	0.00042	1	61207.5	HUMAN	Heterochromatin protein 1-binding protein 3
[191]	P26038	Oxidation	M	200	-	16	23.1	7.01	2.3e-12	953.969	2	2.5	IAQDLEMYGVNYFSIK	Oxidation@7	MDA_143_FTMSms2hcd	42.486	1	54.9	2.3e-12	1	67820.6	HUMAN	Moesin
[191]	P26038	Oxidation	M	305	-	16	23.1	7.01	2.3e-12	496.933	3	-0.43	RKPDTIEVQQMK	Oxidation@11	MDA_143_FTMSms2hcd	16.53	1	37.1	2.6e-07	3	67820.6	HUMAN	Moesin
[191]	P26038	Oxidation	M	543	-	16	23.1	7.01	2.3e-12	521.573	3	-0.15	KTANDMIHAENMR	Oxidation@6;Oxidation@12	MDA_143_FTMSms2hcd	13.837	1	29.6	2e-08	1	67820.6	HUMAN	Moesin
[191]	P26038	Oxidation	M	549	-	16	23.1	7.01	2.3e-12	521.573	3	-0.15	KTANDMIHAENMR	Oxidation@6;Oxidation@12	MDA_143_FTMSms2hcd	13.837	1	29.6	2e-08	1	67820.6	HUMAN	Moesin
[191-1]	P15311	Oxidation	M	200	-	14	22.9	7.54	2.4e-13	981.982	2	2.1	IAQDLEMYGINYFEIK	Oxidation@7	MDA_143_FTMSms2hcd	44.557	1	56.9	4.6e-12	1	69413.4	HUMAN	Ezrin
[191-1]	P15311	Oxidation	M	305	-	14	22.9	7.54	2.4e-13	496.933	3	-0.43	RKPDTIEVQQMK	Oxidation@11	MDA_143_FTMSms2hcd	16.53	1	37.1	2.6e-07	3	69413.4	HUMAN	Ezrin
[191-2]	P35241	Oxidation	M	305	-	9	13.2	4.68	4.7e-08	496.933	3	-0.43	RKPDTIEVQQMK	Oxidation@11	MDA_143_FTMSms2hcd	16.53	1	37.1	2.6e-07	3	68564.5	HUMAN	Radixin
[192]	Q92499	Oxidation	M	152	-	14	25.8	6.59	1.4e-11	862.913	2	1.1	VGWSTMQASLDLGTDK	Oxidation@6	MDA_143_FTMSms2hcd	34.752	1	49.8	2e-10	1	82432.9	HUMAN	ATP-dependent RNA helicase DDX1
[192]	Q92499	Oxidation	M	387	-	14	25.8	6.59	1.4e-11	542.939	3	-0.072	MHNQIPQVTSDGKR	Oxidation@1	MDA_143_FTMSms2hcd	18.917	1	40.9	4.7e-09	1	82432.9	HUMAN	ATP-dependent RNA helicase DDX1
[192]	Q92499	Oxidation	M	484	-	14	25.8	6.59	1.4e-11	673.647	3	1.8	DNTRPGANSPEMWSEAIK	Oxidation@12	MDA_143_FTMSms2hcd	29.965	1	42.4	2.2e-10	1	82432.9	HUMAN	ATP-dependent RNA helicase DDX1
[193]	Q9H4H8	Gln->pyro-Glu	Q	532	-	14	25	6.77	6.4e-12	479.749	2	0.59	QFHFAGIR	Gln->pyro-Glu@1	MDA_143_FTMSms2hcd	36.615	1	28.2	1.8e-05	1	64425	HUMAN	Protein FAM83D
[193]	Q9H4H8	Oxidation	M	350	-	14	25	6.77	6.4e-12	708.839	2	2.5	KADLDPEMPAEGK	Oxidation@8	MDA_143_FTMSms2hcd	19.36	1	53.6	3.5e-10	1	64425	HUMAN	Protein FAM83D
[193]	Q9H4H8	Oxidation	M	446	-	14	25	6.77	6.4e-12	942.937	2	1.2	STTTQTDMDENILFPR	Oxidation@8	MDA_143_FTMSms2hcd	34.885	1	48.7	6.4e-12	1	64425	HUMAN	Protein FAM83D
[194]	O43747	Oxidation	M	208	-	13	18.5	9.48	6.1e-17	363.843	3	0.69	SPDMLAHFR	Oxidation@4	MDA_143_FTMSms2hcd	23.633	1	40.9	4.1e-08	1	91352.3	HUMAN	AP-1 complex subunit gamma-1
[194]	O43747	Oxidation	M	228	-	13	18.5	9.48	6.1e-17	893.105	3	2.7	NLIMSGYSPEHDVSGISDPFLQVR	Oxidation@4	MDA_143_FTMSms2hcd	42.377	1	72.1	6.1e-17	1	91352.3	HUMAN	AP-1 complex subunit gamma-1
[194]	O43747	Oxidation	M	297	-	13	18.5	9.48	6.1e-17	675.033	3	2.6	NVGNAILYETVLTIMDIK	Oxidation@15	MDA_143_FTMSms2hcd	56.771	1	53.1	1.1e-12	1	91352.3	HUMAN	AP-1 complex subunit gamma-1
[194]	O43747	Oxidation	M	531	-	13	18.5	9.48	6.1e-17	492.266	2	0.91	GYALTAIMK	Oxidation@8	MDA_143_FTMSms2hcd	28.907	1	33.3	7.2e-11	2	91352.3	HUMAN	AP-1 complex subunit gamma-1
[194-1]	O75843	Oxidation	M	230	-	4	7.4	6.83	4.8e-12	998.849	3	2.8	TLVTMGYSTEHSISGVSDPFLQVQILR	Oxidation@5	MDA_143_FTMSms2hcd	46.3	1	46	4.8e-12	1	87117.4	HUMAN	AP-1 complex subunit gamma-like 2
[194-1]	O75843	Oxidation	M	532	-	4	7.4	6.83	4.8e-12	492.266	2	0.91	GYALTALMK	Oxidation@8	MDA_143_FTMSms2hcd	28.907	1	33.3	7.2e-11	2	87117.4	HUMAN	AP-1 complex subunit gamma-like 2
[195]	Q86TI2	Acetyl	K	93	-	15	21.3	7.9	5e-14	731.883	2	-14	ENSLLYSEIPKK	Acetyl@11	MDA_143_FTMSms2hcd	44.145	1	16.1	0.002	1	98264.2	HUMAN	Dipeptidyl peptidase 9
[195]	Q86TI2	Oxidation	M	77	-	15	21.3	7.9	5e-14	668.324	2	0.4	LYYLGMPYGSR	Oxidation@6	MDA_143_FTMSms2hcd	32.297	1	22.6	1.1e-06	1	98264.2	HUMAN	Dipeptidyl peptidase 9
[195]	Q86TI2	Oxidation	M	771	-	15	21.3	7.9	5e-14	651.552	4	1.6	YMDVPENNQHGYEAGSVALHVEK	Oxidation@2	MDA_143_FTMSms2hcd	27.849	1	55.7	5e-14	1	98264.2	HUMAN	Dipeptidyl peptidase 9
[196]	Q9UHD2	Oxidation	M	53	-	13	21.5	6.65	1e-11	651.013	3	1.5	VFNNISFLRPVDVQMR	Oxidation@15	MDA_143_FTMSms2hcd	40.268	1	45.8	7.3e-10	1	83642.9	HUMAN	Serine/threonine-protein kinase TBK1
[196]	Q9UHD2	Oxidation	M	142	-	13	21.5	6.65	1e-11	353.859	3	1.1	DIKPGNIMR	Oxidation@8	MDA_143_FTMSms2hcd	20.176	1	32.5	1.2e-07	1	83642.9	HUMAN	Serine/threonine-protein kinase TBK1
[196]	Q9UHD2	Oxidation	M	414	-	13	21.5	6.65	1e-11	601.256	2	0.81	YDLDGDASMAK	Oxidation@9	MDA_143_FTMSms2hcd	21.609	1	46.5	1e-11	1	83642.9	HUMAN	Serine/threonine-protein kinase TBK1
[196]	Q9UHD2	Oxidation	M	697	-	13	21.5	6.65	1e-11	589.311	2	0.53	LKEEMEGVVK	Oxidation@5	MDA_143_FTMSms2hcd	17.45	1	35.2	9e-07	1	83642.9	HUMAN	Serine/threonine-protein kinase TBK1
[196]	Q9UHD2	Oxidation	M	719	-	13	21.5	6.65	1e-11	585.284	2	-0.18	FGSLTMDGGLR	Oxidation@6	MDA_143_FTMSms2hcd	28.806	1	45.4	1.5e-10	1	83642.9	HUMAN	Serine/threonine-protein kinase TBK1
[197]	Q07866	Oxidation	M	257	-	14	27.1	7.65	1.5e-13	585.552	4	1.9	TSGHDHPDVATMLNILALVYR	Oxidation@12	MDA_143_FTMSms2hcd	46.778	1	44.3	1.6e-11	2	65310.1	HUMAN	Kinesin light chain 1
[197]	Q07866	Oxidation	M	491	-	14	27.1	7.65	1.5e-13	742.341	2	1.6	FEAAETLEEAAMR	Oxidation@12	MDA_143_FTMSms2hcd	33.782	1	48.9	2.1e-12	1	65310.1	HUMAN	Kinesin light chain 1
[197]	Q07866	Oxidation	M	516	-	14	27.1	7.65	1.5e-13	752.355	2	1.8	VAEVLNDPENMEK	Oxidation@11	MDA_143_FTMSms2hcd	24.325	1	48.2	1.5e-13	1	65310.1	HUMAN	Kinesin light chain 1
[198]	Q9UKF6	Gln->pyro-Glu	Q	296	-	11	23.5	8.61	2.4e-15	658.855	2	2.3	QININNPFVFK	Gln->pyro-Glu@1	MDA_143_FTMSms2hcd	48.684	1	34.3	6.9e-10	1	77486.7	HUMAN	Cleavage and polyadenylation specificity factor subunit 3
[198]	Q9UKF6	Met-loss+Acetyl	M	1	-	11	23.5	8.61	2.4e-15	850.119	3	2.3	MSAIPAEESDQLLIRPLGAGQEVGR	Met-loss+Acetyl@1	MDA_143_FTMSms2hcd	43.768	1	60.8	7.6e-11	1	77486.7	HUMAN	Cleavage and polyadenylation specificity factor subunit 3
[198]	Q9UKF6	Oxidation	M	368	-	11	23.5	8.61	2.4e-15	617.283	3	1.2	HIMSEPEEITTMSGQK	Oxidation@3;Oxidation@12	MDA_143_FTMSms2hcd	21.608	1	43.9	1.7e-12	1	77486.7	HUMAN	Cleavage and polyadenylation specificity factor subunit 3
[198]	Q9UKF6	Oxidation	M	377	-	11	23.5	8.61	2.4e-15	617.283	3	1.2	HIMSEPEEITTMSGQK	Oxidation@3;Oxidation@12	MDA_143_FTMSms2hcd	21.608	1	43.9	1.7e-12	1	77486.7	HUMAN	Cleavage and polyadenylation specificity factor subunit 3
[198]	Q9UKF6	Oxidation	M	386	-	11	23.5	8.61	2.4e-15	881.069	3	2.4	MSVDYISFSAHTDYQQTSEFIR	Oxidation@1	MDA_143_FTMSms2hcd	39.153	1	73.8	2.4e-15	1	77486.7	HUMAN	Cleavage and polyadenylation specificity factor subunit 3
[198]	Q9UKF6	Oxidation	M	424	-	11	23.5	8.61	2.4e-15	539.542	4	1.7	ALKPPHVILVHGEQNEMAR	Oxidation@17	MDA_143_FTMSms2hcd	26.743	1	37.9	1e-09	1	77486.7	HUMAN	Cleavage and polyadenylation specificity factor subunit 3
[198]	Q9UKF6	Oxidation	M	467	-	11	23.5	8.61	2.4e-15	448.731	2	0.34	VMGFLADK	Oxidation@2	MDA_143_FTMSms2hcd	25.674	1	26.4	0.0001	1	77486.7	HUMAN	Cleavage and polyadenylation specificity factor subunit 3
[198]	Q9UKF6	Oxidation	M	607	-	11	23.5	8.61	2.4e-15	384.202	3	-0.66	KLEMHVYSK	Oxidation@4	MDA_143_FTMSms2hcd	14.563	1	31.4	4.1e-07	1	77486.7	HUMAN	Cleavage and polyadenylation specificity factor subunit 3
[199]	O95486	Oxidation	M	627	-	12	14.6	9.35	1e-16	417.71	2	-0.59	LMSPTGGR	Oxidation@2	MDA_143_FTMSms2hcd	15.863	1	25.1	2.6e-06	1	119750	HUMAN	Protein transport protein Sec24A
[199]	O95486	Oxidation	M	634	-	12	14.6	9.35	1e-16	687.052	3	1.8	MSVFQTQLPTLGVGALKPR	Oxidation@1	MDA_143_FTMSms2hcd	42.48	1	64.4	1e-16	1	119750	HUMAN	Protein transport protein Sec24A
[199]	O95486	Oxidation	M	856	-	12	14.6	9.35	1e-16	527.746	2	0.73	SMTASLSDAR	Oxidation@2	MDA_143_FTMSms2hcd	18.158	1	27.7	6.1e-07	1	119750	HUMAN	Protein transport protein Sec24A
[200]	P22102	Oxidation	M	727	-	11	15.9	9.27	1.5e-16	731.343	3	2.5	VFSWLQQEGHLSEEEMAR	Oxidation@16	MDA_143_FTMSms2hcd	36.222	1	63.8	1.5e-16	1	107768	HUMAN	Trifunctional purine biosynthetic protein adenosine-3
[200]	P22102	Oxidation	M	911	-	11	15.9	9.27	1.5e-16	504.947	3	1.6	MLNIHPSLLPSFK	Oxidation@1	MDA_143_FTMSms2hcd	39.994	1	53.3	6.7e-11	1	107768	HUMAN	Trifunctional purine biosynthetic protein adenosine-3
[201]	P35637	Oxidation	M	321	-	10	22.2	11.02	8.5e-20	712.847	2	2	TGQPMINLYTDR	Oxidation@5	MDA_143_FTMSms2hcd	30.249	1	37	1.2e-08	1	53426.2	HUMAN	RNA-binding protein FUS
[201]	P35637	Oxidation	M	464	-	10	22.2	11.02	8.5e-20	567.998	4	0.83	APKPDGPGGGPGGSHMGGNYGDDR	Oxidation@16	MDA_143_FTMSms2hcd	17.016	1	59.3	8.5e-20	1	53426.2	HUMAN	RNA-binding protein FUS
[201-1]	Q92804	Oxidation	M	270	-	6	10.3	5.62	8.6e-10	506.519	4	1.4	TGKPMINLYTDKDTGKPK	Oxidation@5	MDA_143_FTMSms2hcd	22.383	1	57	2e-09	1	61830.4	HUMAN	TATA-binding protein-associated factor 2N
[202]	Q7L2J0	Phospho	T	213	18	13	23.9	7.89	5.3e-14	857.397	2	0.42	TLNAETPKSSPLPAK	Phospho@6=18;Phospho@10=8	MDA_143_FTMSms2hcd	24.746	1	38.7	2.3e-09	1	74355.8	HUMAN	7SK snRNA methylphosphate capping enzyme
[202]	Q7L2J0	Phospho	S	217	8	13	23.9	7.89	5.3e-14	857.397	2	0.42	TLNAETPKSSPLPAK	Phospho@6=18;Phospho@10=8	MDA_143_FTMSms2hcd	24.746	1	38.7	2.3e-09	1	74355.8	HUMAN	7SK snRNA methylphosphate capping enzyme
[203]	P54886	Oxidation	M	369	-	12	19	8.09	2.2e-14	827.742	3	1.9	VGTFFSEVKPAGPTVEQQGEMAR	Oxidation@21	MDA_143_FTMSms2hcd	33.915	1	61.8	2.2e-14	1	87303.1	HUMAN	Delta-1-pyrroline-5-carboxylate synthase
[truncated: 634 more rows]

## Sheet: Nature 2023 Type1_NT
Hsp90-Beta										PU			YK55					PU			YK55
[truncated: 26 more rows]

## Sheet: ratio
										MDA			LY1			COLON
[truncated: 32 more rows]

## Sheet: MS Sample Log
Project	Set	Sample	Run #
[truncated: 17 more rows]
